# Supplementary material for: Molecular Mechanism of Exogenous ABA to Enhance UV-B Resistance in Rhododendron chrysanthum Pall. by Modulating Flavonoid Accumulation
Source: MDPI journal article supplement (doi:10.3390/ijms25105248), 2024-05-11
Supplement: s1 [file s1]

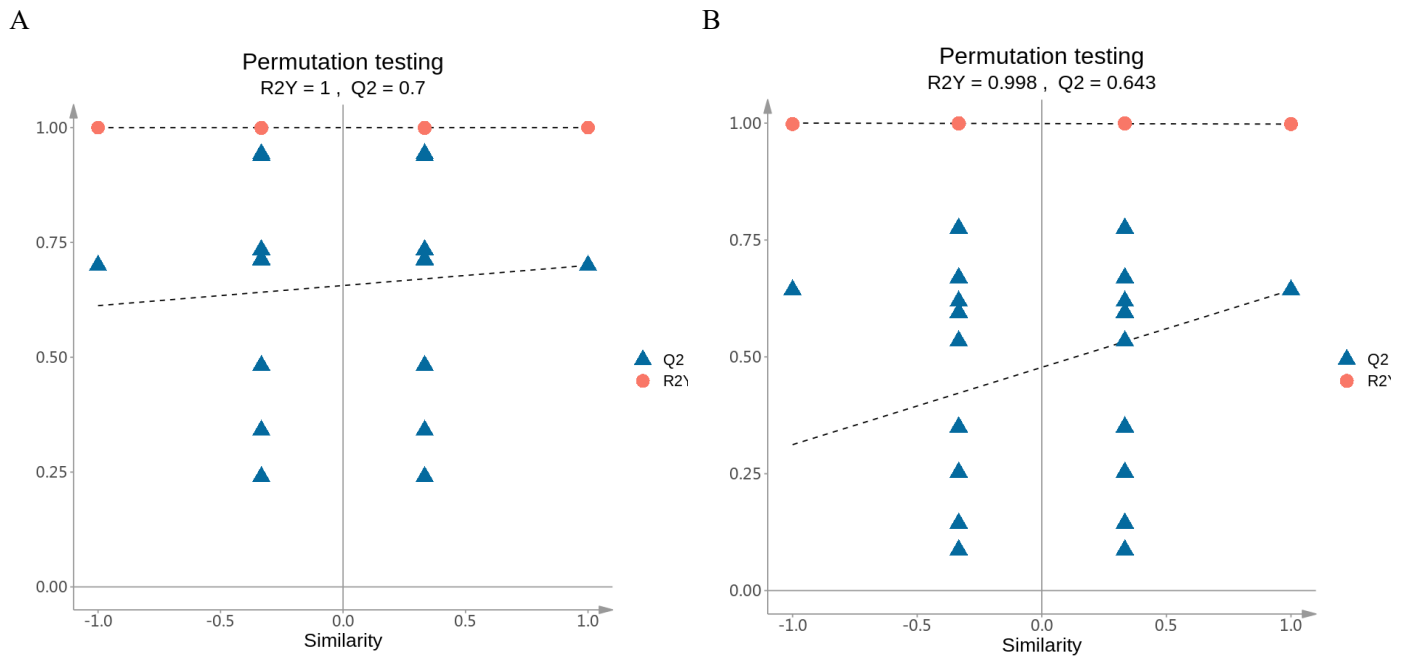

**Supplementary Figure S1:** A, OPLS-DA evaluation model (MvsN); A, OPLS-DA evaluation model (NvsQ).  $R^2X$  and  $R^2Y$  denote the explanatory rate of the constructed model on the X and Y matrices, respectively, and  $Q^2$  denotes the predictive power of the model. A model is generally considered valid when  $Q^2 > 0.5$ .

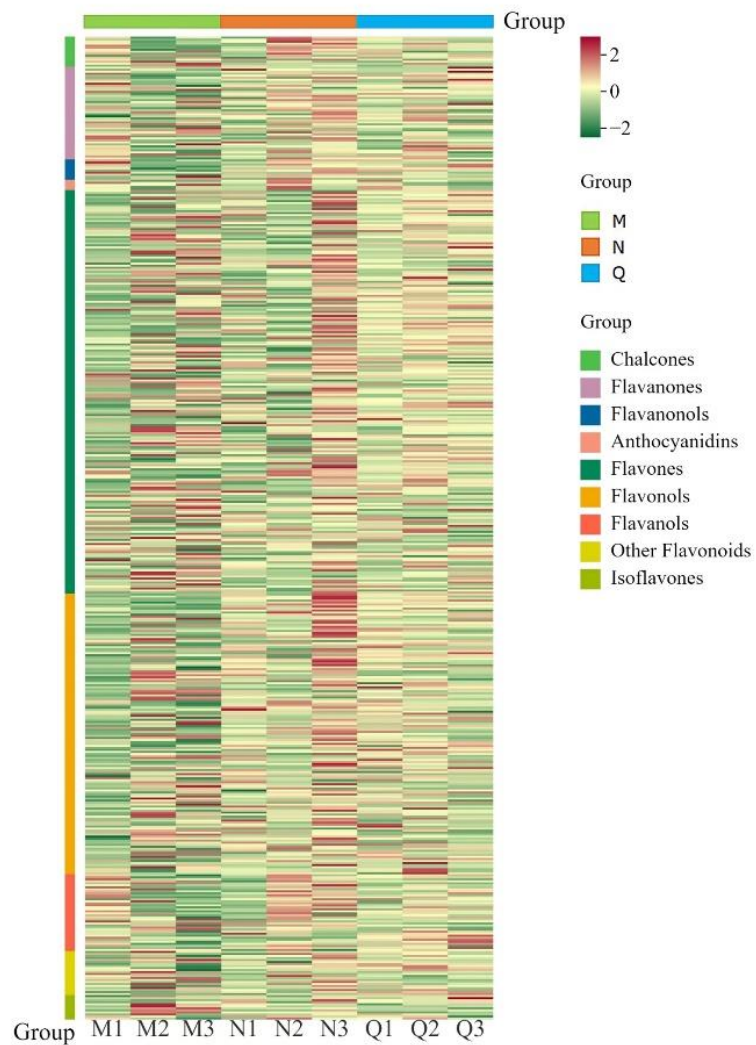

**Supplementary Figure S2:** Clustering heatmap of the detected 487 flavonoids.

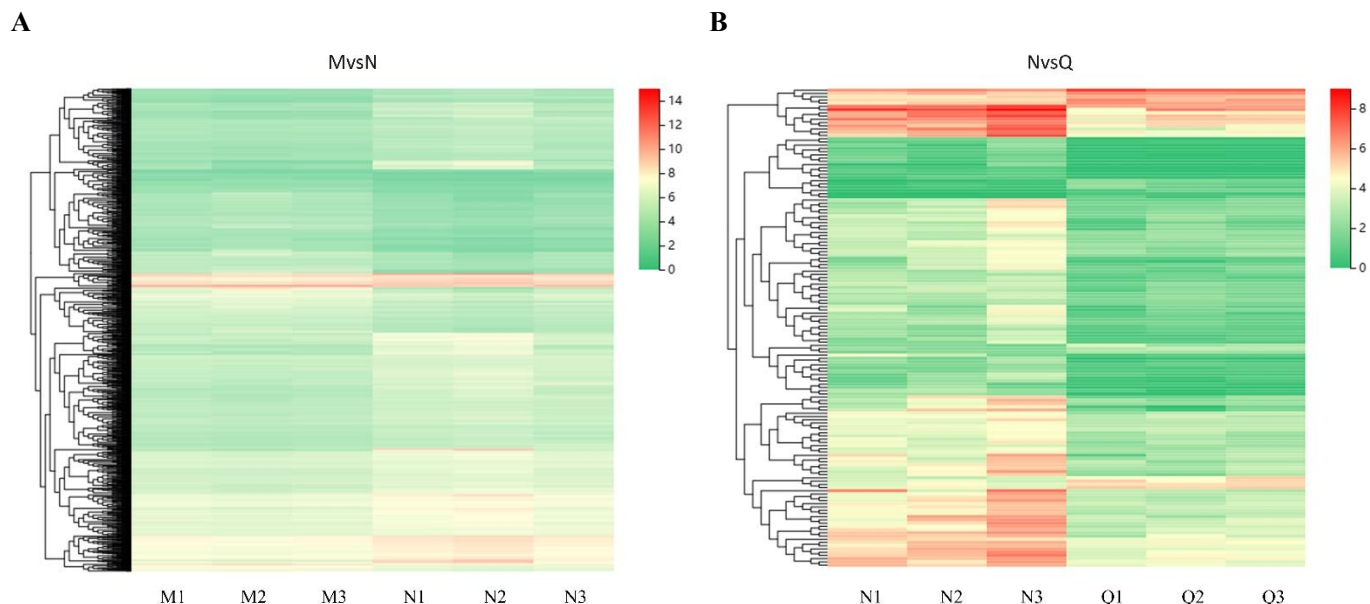

**Supplementary Figure S3:** A, Hierarchical clustering analysis of DEGs in Groups M and N; B, Hierarchical cluster analysis of DEGs in Groups N and Q.

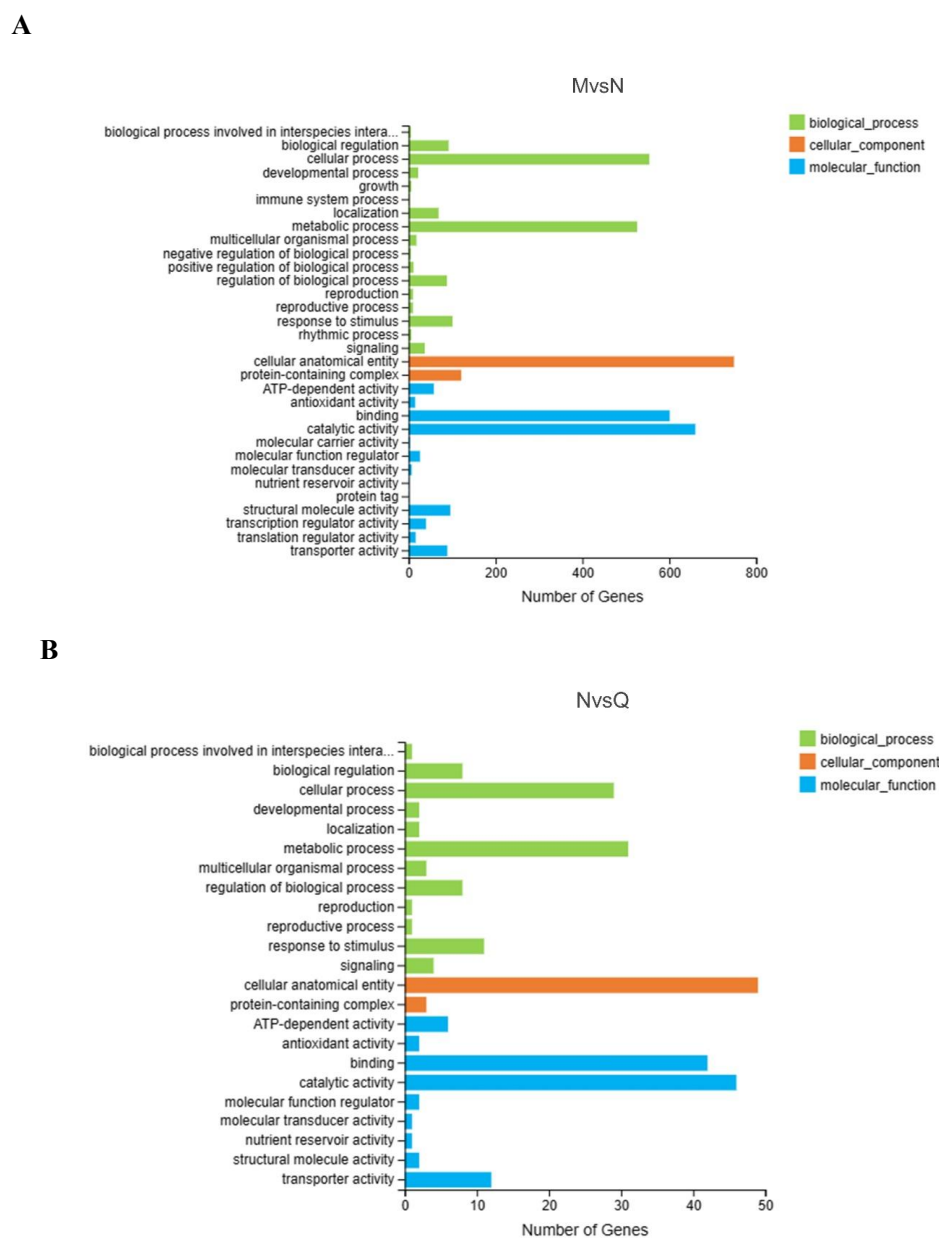

**Supplementary Figure S4:** A, Functional classification of GO term enrichment analysis of DEGs in Group M and Group

N comparison.; B, Functional classification of GO term enrichment analysis of DEGs in Group N and Group Q comparison.

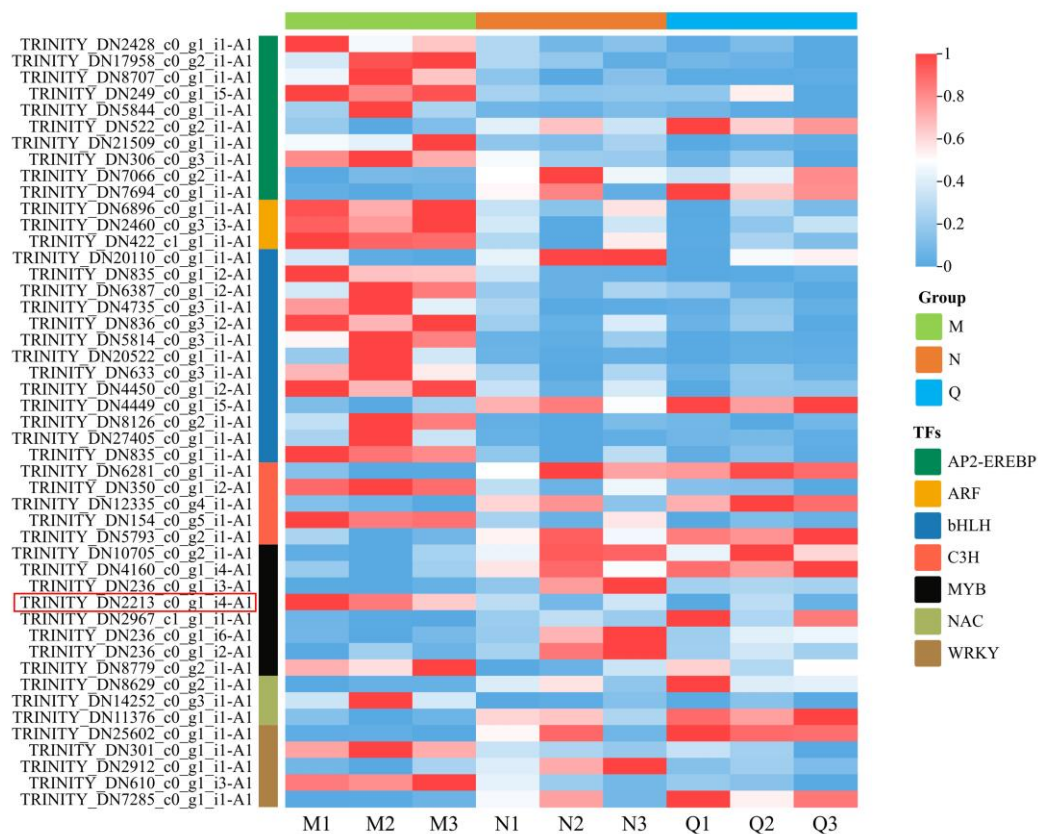

Supplementary Figure S5: Clustering heatmap of key TFs regulating flavonoid-related pathway DEGs.

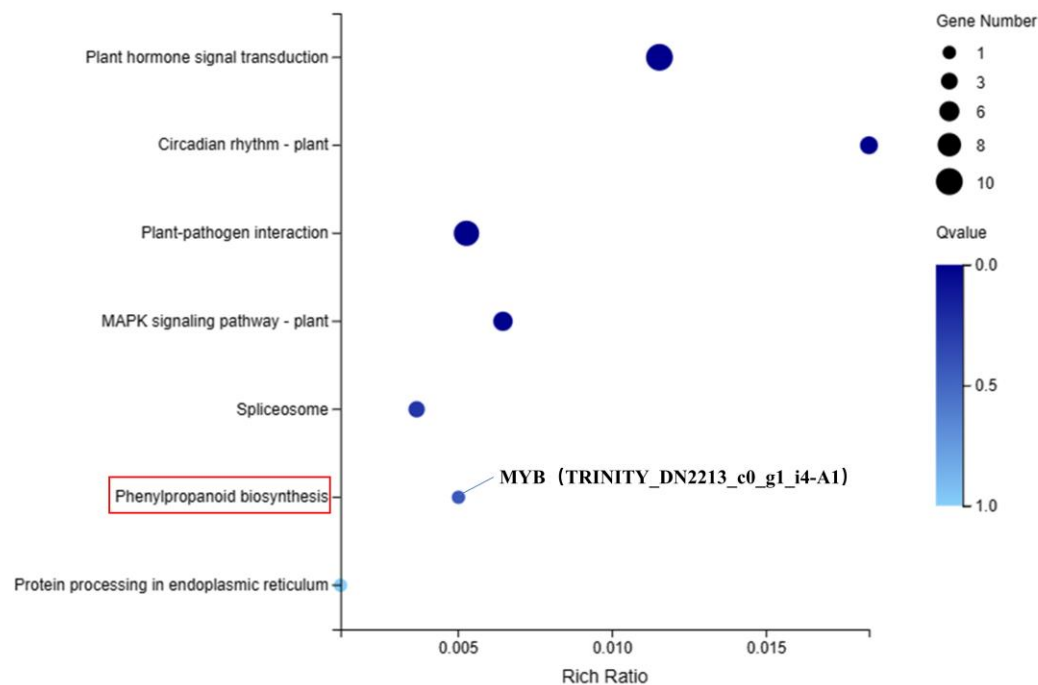

Supplementary Figure S6: Bubble map of KEGG Pathway enrichment of TFs.
