# Supplementary material for: Molecular Mechanism of Exogenous ABA to Enhance UV-B Resistance in Rhododendron chrysanthum Pall. by Modulating Flavonoid Accumulation
Source: Int J Mol Sci. 2024 May 11;25(10):5248. doi: 10.3390/ijms25105248 (PMC11121613; doi:10.3390/ijms25105248)
Supplement: Supplementary file 1 [file ijms-25-05248-s001.zip › Supplementary Table.xlsx]

## Sheet: Table S1
Supplementary Table S1. The relative content information of 2148 metabolites detected by UPLC-MS/MS .
MWDB Index	Formula	Ionization model	Compounds	Class I	Class II	CAS	M1	M2	M3	N1	N2	N3	Q1	Q2	Q3	QC01	QC02	QC03	cpd_ID	kegg_map
pma2987	C6H11N3O	[M+H]+	Histidinol	Alkaloids	Alkaloids	501-28-0	1.73686e+07	1.69254e+07	1.57013e+07	1.89327e+07	1.96001e+07	1.74046e+07	1.9123e+07	1.90989e+07	1.71382e+07	1.69189e+07	1.70302e+07	1.69312e+07	C00860	ko00340,ko01100,ko01110,ko01230
mws0704	C2H8NO4P	[M-H]-	O-Phosphorylethanolamine	Alkaloids	Alkaloids	1071-23-4	39394.8	99960.1	149501	66453.5	62647.4	47024.7	93248.5	107753	69734.3	86841.1	85886.6	87317.8	C00346	ko00563,ko00564,ko00600,ko01100
Yacn003968	C11H13NO3	[M-H]-	Cantleyine	Alkaloids	Alkaloids	30333-81-4	390047	192510	262902	326224	519988	411061	341569	327313	277983	290875	283492	286169	C09933	-
pmb0069	C7H7NO	[M+H]+	Benzamide	Alkaloids	Alkaloids	55-21-0	2.51742e+06	434051	688971	2.64356e+06	3.37977e+06	2.81242e+06	4.49721e+06	6.30753e+06	5.22879e+06	3.08274e+06	3.09194e+06	3.16502e+06	C09815	-
mws0018	C10H26N4	[M+H]+	Spermine	Alkaloids	Alkaloids	71-44-3	984778	967020	916762	948641	966155	956197	1.06784e+06	1.03764e+06	1.09224e+06	1.0201e+06	1.01101e+06	991257	C00750	ko00330,ko00410,ko00480,ko00770,ko01100,ko01240
pme2122	C5H9N3	[M+H]+	Histamine	Alkaloids	Alkaloids	51-45-6	763781	1.09638e+06	1.10088e+06	658715	798955	582091	584349	656780	547971	764719	764737	744912	C00388	ko00340,ko01100,ko01110
Wbjp001317	C11H10N2O2	[M+H]+	vasicinone	Alkaloids	Alkaloids	486-64-6	1.15416e+06	1.83707e+06	988788	1.93689e+06	1.56835e+06	1.78536e+06	1.9854e+06	1.24355e+06	1.6349e+06	1.53854e+06	1.56553e+06	1.51901e+06	-	-
Wbmp002283	C9H7NO	[M+H]+	Α-hydroxyquinoline	Alkaloids	Alkaloids	-	1.75154e+06	4.37643e+06	7.99499e+06	1.03637e+07	5.84147e+06	1.00663e+07	1.11406e+07	6.70963e+06	9.47075e+06	7.11572e+06	6.92597e+06	6.84291e+06	-	-
Zahp013600	C18H35NO	[M+H]+	Octadec-2-enamide	Alkaloids	Alkaloids	-	165057	190273	137184	111735	119923	135079	101420	417502	124651	145102	138667	140149	-	-
MWSslk108	C9H17NO4	[M+H]+	O-Acetyl-L-carnitine	Alkaloids	Alkaloids	3040-38-8	4.7729e+06	2.76757e+06	2.39879e+06	5.94141e+06	5.10708e+06	7.05085e+06	5.49618e+06	4.98086e+06	6.32068e+06	4.43634e+06	4.64924e+06	4.48378e+06	-	-
mws0982	C6H11N3	[M+H]+	1-Methylhistamine	Alkaloids	Alkaloids	501-75-7	155114	144973	161609	148401	136235	149771	142748	130880	135163	146606	139587	144392	C05127	ko00340,ko01100
mws0983	C20H39NO2	[M+H]+	N-Oleoylethanolamine	Alkaloids	Alkaloids	111-58-0	41795.8	10774.8	13088.7	27821.6	31581.1	26642.4	54566.2	38917.8	43031.7	33171.8	34174.7	32355.4	C20792	-
Wbmp007680	C29H41NO5	[M+H]+	5,6,6a,7-tetrahydro-1,2,9,10-tetraethoxy-6-n-pentyl-4H-dibenzo[de,g]quinolin-4-ol	Alkaloids	Alkaloids	-	8.20522e+07	4.09164e+07	4.44074e+07	7.91409e+07	8.71651e+07	9.38722e+07	8.73034e+07	9.05577e+07	1.00336e+08	8.30853e+07	8.58568e+07	8.77543e+07	-	-
Lmxn006423	C7H5NOS	[M-H]-	2(3H)-Benzothiazolone	Alkaloids	Alkaloids	934-34-9	582803	402393	563902	361508	464042	403878	357567	195357	261844	377908	388938	368131	-	-
mws0017	C7H19N3	[M+H]+	Spermidine	Alkaloids	Alkaloids	124-20-9	472869	446897	564506	602446	597548	444234	546891	595438	547394	370274	394477	369697	C00315	ko00330,ko00410,ko00480,ko00940,ko01100,ko02010
Layp000971	C14H21NO8	[M+H]+	Hydroxymenisdaurin D	Alkaloids	Alkaloids	-	405281	1.01143e+06	603258	437871	360777	664725	322636	383731	337524	441103	465113	429702	-	-
Wbmp011352	C37H52N2O11	[M+H]+	Puberaconitidine	Alkaloids	Alkaloids	83685-21-6	1.71925e+07	3.8988e+06	5.58509e+06	1.29734e+07	2.76904e+07	2.36504e+07	2.5775e+07	1.31132e+07	2.18136e+07	1.46853e+07	1.56697e+07	1.45465e+07	-	-
Wbsp001938	C9H17NO5	[M+H]+	Casuarine Analogue	Alkaloids	Alkaloids	-	7.93563e+06	1.16071e+07	9.30203e+06	8.98512e+06	6.34806e+06	6.74571e+06	7.28257e+06	8.13439e+06	7.6943e+06	7.83049e+06	7.2501e+06	7.30538e+06	-	-
Wbmp002299	C22H27NO9	[M+H]+	1-(4-((3,4,5-trihydroxy-6-(hydroxymethyl)tetrahydro-2H-pyran-2-yl)oxy)benzyl)-1,2,3,4-tetrahydroisoquinoline-5,6,7-triol	Alkaloids	Alkaloids	-	1.28396e+07	6.13477e+06	1.16958e+07	1.1859e+07	2.44063e+07	11417099	2.06083e+07	1.6755e+07	9.70866e+06	1.27034e+07	1.38443e+07	1.32823e+07	-	-
pme1002	C8H11NO	[M+H]+	L-Tyramine	Alkaloids	Alkaloids	51-67-2	117370	182649	206490	108753	143614	103561	144152	155550	114941	133811	122422	128252	C00483	ko00350,ko00950,ko01100,ko01110,ko01240
MWS1855	C6H8N2	[M+H]+	2,5-Dimethyl pyrazine	Alkaloids	Alkaloids	123-32-0	846556	1.84913e+06	1.28149e+06	1.36278e+06	791351	1.36321e+06	1.01499e+06	890654	973354	1.17123e+06	1.07158e+06	1.09902e+06	-	-
Hamp011640	C16H33NO	[M+H]+	Hexadecanamide	Alkaloids	Alkaloids	629-54-9	1.70803e+06	1.64168e+06	1.90414e+06	1.57585e+06	1.67332e+06	1.74345e+06	1.6501e+06	1.89161e+06	1.65117e+06	1.67898e+06	1.6963e+06	1.55412e+06	-	-
pma0948	C8H11NO	[M+H]+	Phenylethanolamine	Alkaloids	Alkaloids	7568-93-6	288755	94424	110315	215717	204773	207964	137052	180901	147850	167170	169723	154893	C02735	-
Qmhp090808	C29H28N2O4	[M+H]+	18-Demethylparaensidimerin C	Alkaloids	Alkaloids	-	1.91937e+06	1.99547e+06	2.00654e+06	3945595	4.01469e+06	2.89665e+06	2.27004e+06	2.32679e+06	2.98454e+06	2.45917e+06	2.22213e+06	2.34683e+06	-	-
Zabp010319	C22H18N2O4	[M+H]+	6-cyanodihydrochelerythrine	Alkaloids	Alkaloids	-	783021	720738	845070	918615	654512	1.06518e+06	784032	917657	785466	740054	816293	755171	-	-
Wbmp010544	C37H50N2O11	[M+H]+	10-Hydroxymethyllycaconitine	Alkaloids	Alkaloids	-	1.61161e+07	7.1076e+06	9.88602e+06	2.44319e+07	3.72509e+07	3.90245e+07	3.89816e+07	2.54669e+07	2.97189e+07	2.16728e+07	2.42026e+07	2.25589e+07	-	-
Lcsp002946	C21H33N5O10	[M+H]+	Dihydrozeatin-O-glucoside riboside	Alkaloids	Alkaloids	62512-95-2	1.08785e+06	885916	1.11781e+06	1.34665e+06	1.30905e+06	1.55729e+06	968141	897991	945053	1.02929e+06	1.15215e+06	1.11465e+06	-	-
mws1375	C12H21N3O6	[M+H]+	Nicotianamine	Alkaloids	Alkaloids	34441-14-0	3.63617e+06	3.0204e+06	2.33431e+06	2.00166e+06	3.05086e+06	2.33213e+06	2.10061e+06	1.96995e+06	1.65985e+06	2.52193e+06	2.30808e+06	2.58288e+06	C05324	ko00270,ko00999,ko01100,ko01110
Ybsp009454	C37H38N2O6	[M+H]+	Cepharanthine	Alkaloids	Alkaloids	481-49-2	6.12572e+08	5.11755e+08	558393871	5.90044e+08	5.77501e+08	5.42932e+08	5.9791e+08	5.76481e+08	5.69842e+08	4.66074e+06	4.56083e+06	5.09577e+06	-	-
Lcsp004886	C16H23N5O5S	[M+H]+	2-Methylthio-cis-zeatin riboside	Alkaloids	Alkaloids	52049-48-6	4875410	7132675	4975450	5682880	4641105	5948405	6064835	5800830	4362495	4820245	5065200	5474960	-	-
pmb1912	C20H23N7O7	[M+H]+	10-Formyltetrahydrofolic Acid	Alkaloids	Alkaloids	2800-34-2	5.73166e+06	1.02188e+07	7.13243e+06	8.72262e+06	5.84558e+06	7.57415e+06	6.26089e+06	6.88767e+06	6.21709e+06	6.4525e+06	7.35653e+06	7.18316e+06	C00234	ko00670,ko00970,ko01100,ko01200,ko01240
Zahp012577	C18H33NO	[M+H]+	Octadecadienamide	Alkaloids	Alkaloids	-	71190.8	77776.3	71206.2	67019.5	62738.4	71018.2	68540.3	79210.7	64099.6	67367.8	70784.9	61448.8	-	-
pme3200	C2H7N3	[M+H]+	1-Methylguanidine	Alkaloids	Alkaloids	471-29-4	135627	33708.2	35171.7	111344	119785	108199	100083	110973	103842	154089	146189	132773	C02294	-
Zmbp002461	C15H10N2O3	[M+H]+	3-(2'-Hydroxyl-phenyl)-4-(3H)-quinazolone	Alkaloids	Alkaloids	-	184486	110172	55015	125332	171952	31675	36675	201946	238724	188960	163032	182438	-	-
MWSmce201	C10H14N4O3	[M+H]+	Proxyphylline	Alkaloids	Alkaloids	603-00-9	130060	95225.6	103822	130088	122691	95223.7	163861	144202	114028	132732	120143	113874	-	-
Wcsp002246	C22H17NO3	[M+H]+	N-Phenylethylcrinasiadine	Alkaloids	Alkaloids	-	1.77516e+06	1.51405e+06	1.92028e+06	4.74342e+06	6.46804e+06	5.94628e+06	3.27791e+06	4.0638e+06	2.79881e+06	3.73336e+06	3.93907e+06	3.36507e+06	-	-
pmb0484	C5H14NO+	[M]+	Choline	Alkaloids	Alkaloids	62-49-7	1.33101e+07	4.49191e+07	9.05927e+06	1.19638e+07	1.2608e+07	1.62401e+07	1.39892e+07	1.20628e+07	1.60535e+07	1.83219e+07	1.56603e+07	1.74657e+07	C00114	ko00260,ko00564,ko01100,ko02010
Wbjp002336	C16H18N2O5	[M+H]+	N,N-diethyl-5-hydroxytryptamineoxalate	Alkaloids	Alkaloids	-	1.19843e+06	1.43837e+06	1.25219e+06	2.74334e+06	1.65088e+06	2.77228e+06	1.79066e+06	1.80665e+06	1.87531e+06	1.66655e+06	1.88828e+06	1.94343e+06	-	-
pme2292	C4H12N2	[M+H]+	Putrescine	Alkaloids	Alkaloids	110-60-1	344843	340530	287444	164448	362026	97068.6	390258	427780	402903	389510	336488	343612	C00134	ko00330,ko00470,ko00480,ko00960,ko01100,ko01110,ko02010
pmb1754	C5H15NO4P+	[M]+	O-Phosphocholine	Alkaloids	Alkaloids	107-73-3	4.00528e+06	4.81269e+06	4.95733e+06	4.87749e+06	4.697e+06	4.23304e+06	6.7569e+06	7.78963e+06	6.80743e+06	6.04921e+06	5.27852e+06	5.14749e+06	C00588	ko00564,ko01100
MWSmce207	C6H6N2O	[M+H]+	Acetylpyrazine	Alkaloids	Alkaloids	22047-25-2	669547	1.51748e+06	1.2785e+06	1.20608e+06	744760	1.05827e+06	813666	911429	974093	870797	886931	1.02344e+06	-	-
Hmtp000776	C8H9NO3	[M+H]+	4,5,6-Trihydroxy-2-cyclohexen-1-ylideneacetonitrile	Alkaloids	Alkaloids	-	203206	355216	254041	491935	359805	428981	534787	600033	774484	471839	402911	400323	-	-
MWSmce448	C5H6N2O2	[M+H]+	Imidazol-1-yl-acetic acid	Alkaloids	Alkaloids	22884-10-2	3.98612e+06	7.01998e+06	5.53378e+06	8.28273e+06	1.33874e+07	1.11366e+07	7.89655e+06	8.69792e+06	8.70904e+06	6.71591e+06	7.93749e+06	7.99454e+06	-	-
Zasp102439	C8H7N	[M+H]+	m-Aminophenylacetylene	Alkaloids	Alkaloids	54060-30-9	3.3611e+06	4.67153e+06	6.86143e+06	7.48982e+06	5.037e+06	7.68348e+06	7.95163e+06	5.84523e+06	7.23211e+06	6.59428e+06	5.41573e+06	5.99432e+06	-	-
Wbmp002794	C22H27NO8	[M+H]+	demethylcoclaurine-glucose	Alkaloids	Alkaloids	-	1.99588e+06	195982	775084	1.75203e+06	1.1242e+06	1.45653e+06	1.58291e+06	1.94413e+06	2.22278e+06	1.37793e+06	1.70397e+06	1.49384e+06	-	-
pmp001287	C8H9N	[M+H]+	N-Benzylmethylene isomethylamine	Alkaloids	Alkaloids	-	648804	1.07579e+06	851618	1.60738e+06	1.37555e+06	1.42424e+06	1.99824e+06	2.15948e+06	2.97829e+06	1.91992e+06	1.56367e+06	1.6234e+06	-	-
pme1841	C5H14N2	[M+H]+	Cadaverine	Alkaloids	Alkaloids	462-94-2	59988.8	136133	156220	42668.4	69242.3	63685.9	51027.1	45916	37316.7	68990.2	66961.8	82403.7	C01672	ko00310,ko00470,ko00480,ko00960,ko01100,ko01110
Wbmp002620	C20H23NO4	[M+H]+	(12bs)-4,10,11-trimethoxy-7,8,12b,13-tetrahydro-5h-6-azatetraphen-3-ol	Alkaloids	Alkaloids	-	315351	318218	373216	341941	578421	578067	272061	407067	228730	320770	373361	405430	-	-
Wbjp002330	C11H12N2O3	[M+H]+	(3S)-1,3-dihydroxy-2,3,3a,4-tetrahydropyrrolo[2,1-b]quinazolin-9(1H)-one	Alkaloids	Alkaloids	-	327161	368815	553461	583580	424716	642444	612777	552987	549855	436805	508206	558697	-	-
Wbjp000520	C6H11NO3	[M+H]+	4-Hydroxypipecolic acid*	Alkaloids	Alkaloids	14228-16-1	300517	296828	294943	305037	274774	261171	247369	269752	262833	251660	323764	275355	-	-
MWS1840	C6H15N	[M+H]+	Triethylamine	Alkaloids	Alkaloids	121-44-8	306706	248043	395555	370261	283089	366913	226061	194964	220714	241007	279849	203179	C14691	-
Wbjp002608	C18H23NO9	[M+H]+	5-methoxy-3-methyl-2-oxo-7-((3,4,5-trihydroxy-6-methyltetrahydro-2H-pyran-2-yl)oxy)indolin-3-yl acetate	Alkaloids	Alkaloids	-	1.50371e+06	1.54717e+06	2.56655e+06	1965951	1.62355e+06	2.10369e+06	2.03157e+06	1.43261e+06	1.48105e+06	1.50856e+06	1.77527e+06	2.10408e+06	-	-
Smcp001137	C11H9NO2	[M+H]+	naphthisoxazol A*	Alkaloids	Alkaloids	-	187601	417296	802142	1.15264e+06	672054	1.31822e+06	1.29236e+06	666215	1.16466e+06	1.18698e+06	835612	906747	-	-
Lmmp002080	C11H16N2O	[M+H]+	N-(4-Aminobutyl)benzamide	Alkaloids	Alkaloids	5692-23-9	436776	497833	451319	364856	230751	405820	301020	366528	511038	342491	493589	374254	-	-
pmn001497	C33H44N2O3	[M+CH3COOH-H]-	Dendrocrepine*	Alkaloids	Alkaloids	51020-39-4	22718.9	13498.1	8103.43	21929	26977.8	23838	32050.7	13548.3	22220.7	19447.5	20492.7	28424.2	-	-
pmn001498	C33H44N2O3	[M+CH3COOH-H]-	Isodendrocrepine*	Alkaloids	Alkaloids	50906-94-0	46190	9327.05	11012.8	29341.9	15921.8	33756.3	40586.4	5559.79	42868.6	31361.3	41568.5	27498	-	-
Hmgp002327	C11H9NO2	[M+H]+	3-amino-2-naphthoic acid*	Alkaloids	Alkaloids	-	224206	504297	751468	1.14807e+06	668937	1.28339e+06	1.3091e+06	884731	1.21947e+06	1.23866e+06	764137	952081	-	-
MWStz152	C11H11NO3	[M+H]+	2-(Acetylamino)-3-phenyl-2-propenoic acid	Alkaloids	Alkaloids	5469-45-4	78895.6	55488.3	44281.7	43345	48345	91625.4	33039.1	69739.2	56989.7	51740.5	69754.7	36744.2	-	-
mws1038	C11H22N2O4S	[M-H]-	Pantetheine	Alkaloids	Alkaloids	496-65-1	16983.1	27837.1	22905.1	32069.4	23290.8	25948.1	75025	21686	30021	31542.8	19162.1	18334.2	C00831	ko00332,ko00770,ko01100,ko01110
Qmhp120811	C23H35NO5	[M+H]+	17-Hydroxydaphnigraciline	Alkaloids	Alkaloids	-	41245.7	50487.8	48776.6	69353	58532.9	55660.6	57372.2	44548.7	58817.5	44289.4	78849.2	44687.3	-	-
Lmhp002748	C27H34N2O11	[M+H]+	3β-Isodihydrocadambine 4-oxide	Alkaloids	Alkaloids	1092371-18-0	478351	1.61755e+06	775444	388410	1.00203e+06	510039	702898	979205	548794	701714	896873	1.4859e+06	-	-
Wdzp011126	C23H19NO5	[M+H]+	1-(13-methyl-13,14-dihydro-[1,3]dioxolo[4',5':4,5]benzo[1,2-c][1,3]dioxolo[4,5-i]phenanthridin-14-yl)propan-2-one	Alkaloids	Isoquinoline alkaloids	-	9.37896e+06	10554117	1.19518e+07	1.25944e+07	1.01959e+07	1.61192e+07	1.21145e+07	1.41823e+07	1.27207e+07	1.15454e+07	1.18697e+07	1.15456e+07	-	-
Sazp000955	C12H17NO6	[M+H]+	Tetraphyllin A	Alkaloids	Isoquinoline alkaloids	-	1.11374e+07	6.73494e+06	5.83874e+06	1.20021e+07	1.40742e+07	1.40724e+07	1.12017e+07	1.09262e+07	1.22355e+07	1.0641e+07	1.05951e+07	11416249	-	-
Lmlp001118	C23H29NO8	[M+H]+	3'-Glucosyl-6,7-dihydroxy-N-methyl-benzyltetrahydroisoquinoline	Alkaloids	Isoquinoline alkaloids	-	662058	239671	1.93949e+06	730205	131231	716956	335890	569475	691117	744495	746641	684669	-	-
MWSmce709	C9H7N	[M+H]+	Isoquinoline	Alkaloids	Isoquinoline alkaloids	119-65-3	410477	831542	1.32315e+06	1.50988e+06	842658	1.49238e+06	1.60221e+06	1.11042e+06	1.37266e+06	955744	1.14848e+06	1.26814e+06	C06323	-
Wdsp002909	C20H21NO6	[M+H]+	6-[(7-hydroxy-2-methyl-6-oxo-3,4-dihydroisoquinolin-1-yl)methyl]-2,3-dimethoxybenzoic acid	Alkaloids	Isoquinoline alkaloids	-	48345	61685	63420.3	54333.9	46470.1	76274.1	74907.3	94766.7	56611.5	55268.8	71337.8	80716.3	-	-
pmb0496	C15H22N4O3	[M+H]+	N-Feruloylagmatine	Alkaloids	Phenolamine	-	7.56941e+06	5.02452e+06	4.7668e+06	5.45772e+06	8.67241e+06	5.863e+06	6.22574e+06	8.20048e+06	7.24016e+06	6.02752e+06	6.2909e+06	6.01651e+06	C18325	ko00999,ko01100,ko01110
Lmlp003161	C14H20N2O3	[M+H]+	N-Feruloylputrescine	Alkaloids	Phenolamine	501-13-3	1.13652e+06	351486	458804	657953	1.2517e+06	1.20848e+06	523787	688666	310681	773997	787119	728508	C10497	ko00330,ko01100
MWStz070	C9H11NO3	[M+H]+	N-(2-Hydroxy-4-methoxyphenyl)acetamide	Alkaloids	Phenolamine	58469-06-0	4.86937e+06	2.81219e+06	4.5472e+06	8.25097e+06	6.69275e+06	7.78054e+06	8.94061e+06	1.00375e+07	1.14079e+07	7.09498e+06	7.38193e+06	6.67951e+06	-	-
Lahp003147	C13H18N2O	[M+H]+	N,N-cinnamoylbutanediamine*	Alkaloids	Phenolamine	-	1.67176e+06	1.18261e+06	1.28858e+06	2.2275e+06	1.76653e+06	2.01258e+06	1.71069e+06	1.70985e+06	1.42096e+06	1.42481e+06	1.65081e+06	1.48427e+06	-	-
Hmcp009963	C11H18NO+	[M]+	Candicine	Alkaloids	Phenolamine	6656-13-9	1.66779e+07	6.05213e+06	1.24179e+07	7.31608e+06	1.16498e+07	8.24486e+06	6.36857e+06	3.64945e+06	4.26278e+06	8.66773e+06	7.72532e+06	7.0871e+06	C10575	-
mws0596	C7H7NO3	[M+H]+	3-Hydroxyanthranilic acid	Alkaloids	Phenolamine	548-93-6	1122745	148435	235953	1.12528e+06	350326	1.16736e+06	722145	252878	519710	600275	474005	558438	C00632	ko00380,ko01100,ko01240
pma0702	C29H39N3O8	[M+H]+	N1,N8-Bis(sinapoyl)spermidine	Alkaloids	Phenolamine	-	76619.6	83365	180838	77933.6	109332	46680	53265.5	103375	72135.8	75507.5	75025	94045.8	C21170	-
Wahp005277	C34H37N3O9	[M+H]+	Tricaffeoyl Spermidine	Alkaloids	Phenolamine	-	198298	204206	182488	215713	204646	328315	188501	307446	163267	189538	147738	156933	C18070	ko00940,ko01110
Wagp001741	C19H28N2O9	[M+H]+	N-(gamma-L-glutamyl)tyramine O-glucoside	Alkaloids	Phenolamine	-	819622	877360	1.16427e+06	1.5767e+06	955172	707529	641831	681499	1.2711e+06	615010	742734	819891	-	-
pma0633	C19H32N4O2	[M+H]+	N-p-Coumaroylspermine	Alkaloids	Phenolamine	130210-35-4	130851	125182	120797	156966	85511.3	135185	174903	153868	114548	114221	145765	153223	-	-
pmb0494	C15H22N2O4	[M+H]+	Sinapoylputrescine	Alkaloids	Phenolamine	70185-57-8	89079.3	65934.3	79939.6	46118.8	23956.5	40294.8	47618.8	42466.5	30681.9	54967.3	39498.3	50047.7	-	-
Qagp003587	C13H18N2O	[M+H]+	N-Monocinnamoylputrescine*	Alkaloids	Phenolamine	-	1791200	1553430	4.02196e+06	1885740	2.60692e+06	1671425	1.78201e+06	2024290	1.83264e+06	1.89237e+06	2366170	1696720	-	-
pmb0489	C19H28N2O7	[M+H]+	N-Glucosyl-p-coumaroylputrescine	Alkaloids	Phenolamine	-	76682.7	80444.4	74147.8	46296	73816.9	47015.2	40158	120579	48547.6	76845.3	50696.7	68764.4	-	-
pmb0504	C21H32N4O8	[M+H]+	N-(4'-O-glycosyl)-feruloyl agmatine	Alkaloids	Phenolamine	-	221695	107164	31437.5	114256	237381	179355	181079	228032	207337	130179	185880	128900	-	-
pmp001214	C16H24NO5+	[M]+	Sinapine	Alkaloids	Phenolamine	18696-26-9	29752.8	68355	96705	65020	101710	50015	150085	55015	71690	91700	83365	53350	C00933	ko00940,ko01110
GQ512004	C25H33N3O5	[M+H]+	N1-Dihydrocaffeoyl-N10-coumaroylspermidine	Alkaloids	Phenolamine	-	32430.3	77024.7	153420	133400	47095.5	90035	63007.5	53065.5	63323.4	47983.2	82782.9	87149.9	-	-
pmb0492	C34H37N3O6	[M+H]+	N',N'',N'''-p-Coumaroyl-cinnamoyl-caffeoyl spermidine	Alkaloids	Phenolamine	-	53698.9	76095.7	52874.6	70460.2	115997	86828.8	62651	93355.2	82534.4	90669.9	47722.3	57794.5	-	-
pmp001198	C6H13NO2	[M+H]+	6-Deoxyfagomine	Alkaloids	Piperidine alkaloids	197449-09-5	2.36863e+06	4.02145e+06	8.92239e+06	6.17365e+06	2.41573e+06	5.44196e+06	6.3574e+06	4.01575e+06	5.02131e+06	5.03876e+06	5.07715e+06	4.90965e+06	-	-
pmb0782	C5H11N	[M+H]+	Piperidine	Alkaloids	Piperidine alkaloids	110-89-4	1.19568e+06	3.50069e+06	5.42517e+06	3.70907e+06	1.63587e+06	2.89303e+06	3.3181e+06	2.52181e+06	2.60967e+06	3.03191e+06	2.77176e+06	2.69025e+06	C01746	ko00960
Zmsp000366	C6H13NO3	[M+H]+	Fagomine	Alkaloids	Piperidine alkaloids	53185-12-9	165660	73076.2	222284	141695	137409	146580	147048	151977	162969	158060	137267	171090	C10144	-
Zmtn001624	C10H7NO3	[M-H]-	N-Acetylisatin	Alkaloids	Plumerane	574-17-4	620136	415982	339743	727418	718330	766029	628307	492772	440142	579720	561452	564479	C02172	ko00380
Hmyp002656	C11H11NO4	[M+H]+	Methyl dioxindole-3-acetate	Alkaloids	Plumerane	57061-18-4	1.8837e+06	3.98179e+06	2.3858e+06	3.1517e+06	1.74078e+06	2.6098e+06	2.38106e+06	1.91522e+06	2.3658e+06	2.41458e+06	2.32728e+06	2.37714e+06	-	-
pmb0818	C11H11NO3	[M+H]+	Methoxyindoleacetic acid	Alkaloids	Plumerane	3471-31-6	763414	1.65602e+06	2.71531e+06	4.17892e+06	2.5168e+06	4.19945e+06	4.41665e+06	2.91553e+06	3.69406e+06	3.0068e+06	2.86673e+06	3.076e+06	C05660	ko00380
Lcsp001671	C10H9NO3	[M+H]+	2-oxindole-3-acetic acid	Alkaloids	Plumerane	2971-31-5	512391	437118	402357	1.44648e+06	1.19906e+06	1.58501e+06	1.47917e+06	1.73918e+06	1.95067e+06	1.08475e+06	1.06438e+06	982959	C22202	ko00380
pme2836	C10H11NO2	[M+H]+	5-Hydroxytryptophol	Alkaloids	Plumerane	154-02-9	2.85342e+06	1.80554e+06	2.33427e+06	2.44031e+06	2.57336e+06	2.53834e+06	2.00059e+06	1.96301e+06	1.49188e+06	2.26103e+06	2.02582e+06	2.1695e+06	-	-
Wdmp005910	C31H36N2O8	[M+H]+	Raunescine	Alkaloids	Plumerane	-	1.95103e+06	1.67849e+06	2.21142e+06	2.02951e+06	2.33336e+06	3.25974e+06	1.40541e+06	621344	536505	1.59352e+06	1.77766e+06	1.77914e+06	-	-
Lmyn002540	C16H19NO9	[M-H]-	Dioxindole-3-acetyl-3-O-glucoside	Alkaloids	Plumerane	-	128789	185081	123384	307882	108525	234940	196711	193813	186356	187069	175164	201755	-	-
Zblp004317	C11H11NO3	[M+H]+	(S)-3-(2-oxopropyl)-3-hydroxyindolin-2-one	Alkaloids	Plumerane	-	288192	213500	210160	191087	591230	173988	212252	175300	300320	330390	348765	301990	-	-
pmb1096	C8H7N	[M+H]+	Indole	Alkaloids	Plumerane	120-72-9	1395140	4.56988e+06	6.0886e+06	6.87723e+06	4.78281e+06	6.70627e+06	7.45191e+06	5.26738e+06	6.48336e+06	6.08723e+06	5.22112e+06	5.46198e+06	C00463	ko00380,ko00400,ko00402,ko00999,ko01100,ko01110
Zmbp002538	C11H12N2O2	[M+H]+	1-Methoxy-indole-3-acetamide	Alkaloids	Plumerane	-	427225	1.21048e+06	2.23991e+06	3.3985e+06	1.85241e+06	3.36039e+06	3.35864e+06	2.47264e+06	3.63787e+06	2.76972e+06	2.1867e+06	2.56976e+06	-	-
MWSmce208	C11H8N2	[M+H]+	Norharmane; Beta-Carboline	Alkaloids	Plumerane	244-63-3	386613	190445	92473.2	261599	349922	296287	161385	171932	352635	248665	225526	194837	-	-
MWStz058	C14H12N2O3	[M+H]+	7-Hydroxy-β-carboline-1-propionic acid	Alkaloids	Plumerane	215934-15-9	196904	151169	142181	263500	217658	214325	239397	256751	238554	187193	225608	176620	-	-
ML10198935	C11H14N2O	[M+H]+	N-Methylserotonin	Alkaloids	Plumerane	1134-01-6	85300.3	51699.5	34685.8	381565	60881.8	49552.3	153025	99258.8	148745	95524	82405.9	71316.4	C06212	ko00380
pme2244	C11H11NO2	[M+H]+	3-Indolepropionic acid	Alkaloids	Plumerane	830-96-6	113522	287018	472076	624603	363132	656765	598615	421060	546984	460305	339217	425484	-	-
Hmmp001310	C11H9NO2	[M+H]+	3-Indoleacrylic acid	Alkaloids	Plumerane	1204-06-4	238487	495328	866133	1.30059e+06	701307	1.44892e+06	1.49978e+06	960355	1.27409e+06	1.25581e+06	858946	1.00463e+06	C21283	-
Lahp001956	C11H9O2N	[M+H]+	Pyran[3,4-b]indole-2-ketone	Alkaloids	Plumerane	-	238487	495328	866133	1.30059e+06	701307	1.44892e+06	1.49978e+06	960355	1.27409e+06	1.25581e+06	858946	1.00463e+06	-	-
mws0620	C11H14N2	[M+H]+	N-Methyltryptamine	Alkaloids	Plumerane	61-49-4	20652.6	36945.9	39512.3	41680	20005	22733.6	24471.1	24408.5	20032.9	12517.7	21290.9	15655	C06213	ko00380,ko01100
Hmcp001824	C12H8N2O2	[M+H]+	Ailanindole	Alkaloids	Plumerane	159903-51-2	666673	404348	527296	449712	577184	733759	425599	669183	597925	855900	510138	551424	-	-
Wayp004564	C9H11NO3	[M+H]+	4-hydroxy-4-(3-pyridyl)-butanoic acid	Alkaloids	Pyridine alkaloids	15569-97-8	2.15804e+06	516951	423698	2.29933e+06	1.84171e+06	2.16294e+06	1.93814e+06	1967624	2.48675e+06	1.8697e+06	1.73983e+06	1.73214e+06	C19579	-
pme2268	C7H7NO2	[M+H]+	Trigonelline	Alkaloids	Pyridine alkaloids	535-83-1	165952	256150	291786	155462	135345	128620	156042	188620	130829	196610	215536	193167	C01004	ko00960
Zblp001009	C12H17NO6	[M+H]+	3-pyridine-methanol-O-β-D-glucopyranosyl	Alkaloids	Pyridine alkaloids	-	1.28742e+07	1.08757e+07	8.57279e+06	1.60381e+07	1.76876e+07	1.91198e+07	1.29514e+07	1.24598e+07	1.47031e+07	1.27062e+07	1.44854e+07	1.33131e+07	-	-
Wayp003781	C24H38N2O7	[M+H]+	N-Hydroxynonanoyl nornicotine glucoside	Alkaloids	Pyridine alkaloids	-	907934	1.48637e+06	1.76644e+06	1.69071e+06	1.85168e+06	1.81712e+06	3.11888e+06	1.84387e+06	1.06272e+06	1.23693e+06	1.38944e+06	1.65144e+06	-	-
pma6298	C5H5NO	[M+H]+	3-Hydroxypyridine	Alkaloids	Pyridine alkaloids	109-00-2	93438.4	117008	86542.7	102935	69817.6	96217	58045.1	52020	64033.5	78326.9	100747	66395	-	-
pme1137	C6H5NO3	[M+H]+	6-Hydroxynicotinic acid	Alkaloids	Pyridine alkaloids	5006-66-6	445850	214298	230716	451683	248935	227972	305943	390572	152828	273993	346419	435207	C01020	ko00760,ko01100
Wasn002329	C16H17NO9	[M-H]-	Xanthurenic Acid 8-O-Glucoside	Alkaloids	Quinoline alkaloids	97451-32-6	1.46e+07	1.96903e+07	1.62154e+07	2.88923e+07	1.34857e+07	2.88681e+07	2.06935e+07	1.90717e+07	1.9715e+07	1.8953e+07	1.83954e+07	1.93321e+07	-	-
Ladp002110	C10H7NO4	[M+H]+	4-hydroxy-2-oxo-1,2-dihydroquinoline-3-carboxylic acid	Alkaloids	Quinoline alkaloids	73776-24-6	5.03473e+06	5.0104e+06	3.31074e+06	7.93376e+06	4.32462e+06	8.4234e+06	4.74902e+06	5.7357e+06	5.14171e+06	4.93886e+06	4.79063e+06	4.54945e+06	-	-
Wcjp002598	C9H7NO	[M+H]+	8-hydroxyquinoline	Alkaloids	Quinoline alkaloids	148-24-3	2.80111e+06	6.48225e+06	1.25723e+07	15076918	8.33742e+06	1.54013e+07	1.69688e+07	1.04287e+07	1.33946e+07	9.87835e+06	9.67163e+06	1.04828e+07	C19434	-
Ladp002935	C10H7NO3	[M+H]+	3-quinolinecarboxylic acid	Alkaloids	Quinoline alkaloids	-	1.49311e+06	930199	734796	1.47721e+06	1.57923e+06	1.6638e+06	1.29269e+06	972401	1.0262e+06	1.17065e+06	1.03212e+06	1.15117e+06	-	-
NK10246260	C9H7NO2	[M+H]+	2,4-Dihydroxyquinoline	Alkaloids	Quinoline alkaloids	86-95-3	145138	253565	127384	229295	128395	136681	168568	152533	151842	143114	195577	152798	C16716	ko00996
mws0393	C20H24O2N2	[M+H]+	Quinine	Alkaloids	Quinoline alkaloids	130-95-0	14621.5	93642.4	67480.7	26763.2	51680	22902.8	27412.3	43113.9	15152.1	44631.8	49090.4	33405.1	C06526	-
Lahp002608	C11H9NO2	[M+H]+	3,5-Dihydro-2H-Furo[3,2-C]Quinolin-4-One	Alkaloids	Quinoline alkaloids	-	170458	468237	791466	1.13722e+06	782900	1.46077e+06	1.39065e+06	934083	1.32605e+06	1.24001e+06	875165	881898	-	-
pme2527	C5H12N2O2	[M+H]+	L-Ornithine	Amino acids and derivatives	Amino acids and derivatives	70-26-8	2.13388e+06	2.27929e+06	2.43538e+06	1.04052e+06	1.70694e+06	1.19234e+06	1.28119e+06	1.47914e+06	1.44109e+06	1.69241e+06	1.7179e+06	1.70743e+06	C00077	ko00220,ko00330,ko00470,ko00480,ko01100,ko01110,ko01210,ko01230,ko02010
mws4516	C5H7NO3	[M+H]+	Pyroglutamic acid	Amino acids and derivatives	Amino acids and derivatives	4042-36-8	2.40104e+06	7.25376e+06	8.62854e+06	1.71741e+06	1.66191e+06	1.19822e+06	2.22454e+06	2.60273e+06	1.94369e+06	3.55722e+06	3.61434e+06	3.57193e+06	-	-
MWS201415	C9H14N2O5	[M+H]+	Pro-Asp	Amino acids and derivatives	Amino acids and derivatives	85227-98-1	1.29471e+06	1.85525e+06	1.58282e+06	1.51768e+06	2.6229e+06	1.57367e+06	1.47115e+06	1.35474e+06	1.462e+06	1.5527e+06	1.52782e+06	1.54525e+06	-	-
MWS3166	C18H35NO3	[M-H]-	N-Palmitoylglycine	Amino acids and derivatives	Amino acids and derivatives	2441-41-0	42194.6	50033.5	39334.8	40550.1	39190.8	44336.3	43815.5	38571	40417.1	42083.1	41314.8	41843	-	-
Zmdp001663	C10H18N2O5S	[M+H]+	γ-glutamylmethionine	Amino acids and derivatives	Amino acids and derivatives	17663-87-5	241536	2.58457e+06	1.14289e+06	96730.9	6.06299e+07	174937	157800	210650	127522	6.36913e+06	6.49416e+06	6.42459e+06	-	-
pme2679	C6H13NO2	[M+H]+	L-Allo-isoleucine	Amino acids and derivatives	Amino acids and derivatives	1509-34-8	42118.5	288372	564362	328156	117758	276413	309446	279496	308826	268419	274252	273293	C21096	-
pme1210	C5H11NO2S	[M+H]+	L-Methionine	Amino acids and derivatives	Amino acids and derivatives	63-68-3	2.12488e+06	3.66323e+06	3.51172e+06	1.01095e+06	1.12274e+06	923591	760438	935274	775877	1.48731e+06	1.49799e+06	1.52203e+06	C00073	ko00270,ko00470,ko00966,ko00970,ko00999,ko01100,ko01110,ko01210,ko01230,ko01240
Zmdp001647	C10H18N2O5	[M+H]+	γ-Glutamyl-L-valine	Amino acids and derivatives	Amino acids and derivatives	-	356376	2.04226e+06	2.24974e+06	447798	1.96629e+06	358419	436875	436311	318519	863736	843142	848174	-	-
pme2566	C8H14N2O5	[M-H]-	5-L-Glutamyl-L-amino acid	Amino acids and derivatives	Amino acids and derivatives	5875-41-2	377853	1.01966e+06	570847	458417	504223	350033	471118	447197	468057	529781	526415	515221	-	-
Zmzp000145	C9H20N2O2	[M+H]+	Trimethyllysine	Amino acids and derivatives	Amino acids and derivatives	23284-33-5	1.59521e+07	3.64805e+07	3.86307e+07	9.62859e+06	1.75053e+07	1.01996e+07	8.89502e+06	1.16204e+07	8.05272e+06	1.62533e+07	1.67411e+07	1.63776e+07	C03793	ko00310,ko01100
MWS5164	C8H18N4O2	[M+H]+	N,N'-Dimethylarginine;SDMA*	Amino acids and derivatives	Amino acids and derivatives	30344-00-4	4.99493e+06	1.51987e+07	1.53414e+07	4.47844e+06	7.37634e+06	4.77237e+06	3.91841e+06	5.20653e+06	3.37854e+06	7.24532e+06	7.18367e+06	6.98621e+06	-	-
pme0075	C7H11NO5	[M-H]-	N-Acetyl-L-glutamic acid	Amino acids and derivatives	Amino acids and derivatives	1188-37-0	521861	564730	518907	528367	520794	306318	586167	575006	501424	527009	506672	516684	C00624	ko00220,ko00470,ko01100,ko01110,ko01210,ko01230
MWS201384	C8H17N5O3	[M+H]+	Arg-Gly	Amino acids and derivatives	Amino acids and derivatives	108347-93-9	172042	196824	149488	158111	285090	193095	199350	184467	150481	177257	176099	182730	-	-
Zmdp000292	C7H16N4O2	[M+H]+	Arginine methyl ester*	Amino acids and derivatives	Amino acids and derivatives	-	4.2332e+07	7.08984e+07	8.19412e+07	2.64733e+07	4.98164e+07	2.78673e+07	2.4008e+07	3.20399e+07	2.12712e+07	4.02985e+07	4.18078e+07	4.16649e+07	-	-
pme3351	C6H11NO3	[M-H]-	Allysine(6-Oxo DL-Norleucine)	Amino acids and derivatives	Amino acids and derivatives	1962-83-0	180245	61514	316659	60397.4	170235	202581	198200	143331	174101	212522	205053	204858	C04076	ko00300,ko00310,ko00960,ko01100,ko01110,ko01230
Zmzn000113	C5H9NO4	[M-H]-	L-threo-3-Methylaspartate	Amino acids and derivatives	Amino acids and derivatives	6061-13-8	1.90861e+06	3.9328e+06	4.51751e+06	2.20871e+06	1.62641e+06	1.92048e+06	1.808e+06	2.0436e+06	1.73558e+06	2.28144e+06	2.18993e+06	2.26776e+06	C03618	ko00630,ko00660,ko01100,ko01200
pme0137	C7H12N2O4	[M-H]-	N-Acetyl-L-Glutamine	Amino acids and derivatives	Amino acids and derivatives	2490-97-3	1.76147e+06	2.60642e+06	2.56825e+06	1.42592e+06	2.05326e+06	1.69594e+06	1.36391e+06	1.69892e+06	1.50736e+06	1.73323e+06	1.69055e+06	1.76782e+06	-	-
MWS04559g	C9H11NO3	[M+H]+	3-Hydroxy-L-phenylalanine*	Amino acids and derivatives	Amino acids and derivatives	587-33-7	2.64491e+06	1.50742e+06	2.63584e+06	4.66071e+06	3.72834e+06	4.01995e+06	4.82758e+06	5.42911e+06	7.38913e+06	3.81782e+06	3.94457e+06	3.98916e+06	-	-
pme3827	C9H11NO4	[M+H]+	3,4-Dihydroxy-L-phenylalanine (L-Dopa)	Amino acids and derivatives	Amino acids and derivatives	59-92-7	8.31351e+06	6.38594e+06	7.62097e+06	9.09475e+06	7.39182e+06	9.24766e+06	9.36421e+06	7.768e+06	6.73211e+06	7.84533e+06	7.4983e+06	7.76171e+06	C00355	ko00350,ko00950,ko00965,ko01100,ko01110
MWS201054	C6H11NO4	[M+H]+	O-Acetyl-L-homoserine	Amino acids and derivatives	Amino acids and derivatives	250736-84-6	593159	1.25875e+06	957773	857736	651812	668695	645456	588103	687324	742489	761353	723874	-	-
Lmhp001732	C14H18N2O3	[M+H]+	L-Prolyl-L-Phenylalanine	Amino acids and derivatives	Amino acids and derivatives	13589-02-1	44688.9	59106	52002.3	122989	95372.9	121912	80490.1	125509	139801	75861.5	72370.8	72882.6	-	-
mws0224	C5H11NO2S	[M+H]+	DL-Methionine	Amino acids and derivatives	Amino acids and derivatives	59-51-8	1.62974e+06	2.89578e+06	2.76176e+06	1.01581e+06	1.04115e+06	1.00977e+06	845246	947575	828654	1.4573e+06	1.41544e+06	1.49144e+06	C01733	-
Zmyn000155	C7H14N2O3	[M-H]-	N-α-Acetyl-L-ornithine	Amino acids and derivatives	Amino acids and derivatives	6205-08-9	2.01347e+06	5.34539e+06	9.40952e+06	1.62372e+06	2.51723e+06	1.39044e+06	1.23229e+06	1.60533e+06	1.14414e+06	2.38188e+06	2.37011e+06	2.49014e+06	C00437	ko00220,ko01100,ko01110,ko01210,ko01230
MWS201414	C9H15N3O4	[M+H]+	Pro-Asn	Amino acids and derivatives	Amino acids and derivatives	107856-82-6	3.63287e+06	4.70499e+06	3.70825e+06	4.1361e+06	3.52268e+06	3.97217e+06	3.54213e+06	3.95644e+06	3.83044e+06	3.50591e+06	3.64081e+06	3.70793e+06	-	-
mws0193	C7H15N3O3	[M+H]+	L-Homocitrulline	Amino acids and derivatives	Amino acids and derivatives	1190-49-4	1.22291e+06	2.0254e+06	2.06467e+06	992386	1.12381e+06	872092	948982	1.02675e+06	863245	1.19122e+06	1.23159e+06	1.16327e+06	C02427	-
pme2617	C5H11NO3S	[M+H]+	L-Methionine Sulfoxide	Amino acids and derivatives	Amino acids and derivatives	3226-65-1	599998	534465	672730	699560	580502	642731	682907	649936	699041	630792	669702	655329	C02989	ko00270,ko01100
Zmjp000182	C7H16N4O2	[M+H]+	N-Monomethyl-L-arginine*	Amino acids and derivatives	Amino acids and derivatives	17035-90-4	4.72893e+07	7.8655e+07	2.31466e+07	8.36146e+06	1.71217e+07	9.84079e+06	8.04639e+06	1.02116e+07	6.52773e+06	1.33893e+07	1.39566e+07	1.42527e+07	C03884	-
Zmdp001857	C14H18N2O6	[M+H]+	γ-Glutamyltyrosine	Amino acids and derivatives	Amino acids and derivatives	7432-23-7	915383	2.14322e+06	2.90505e+06	1.53453e+06	2.07897e+06	1.61275e+06	1.95648e+06	1.84055e+06	1.9052e+06	1.73671e+06	1.84069e+06	1.83289e+06	-	-
MWS201444	C7H13N3O4	[M+H]+	Gln-Gly	Amino acids and derivatives	Amino acids and derivatives	2650-65-9	1.45517e+07	1.38028e+07	1.51816e+07	1.53759e+07	1.45056e+07	1.54087e+07	1.48059e+07	15782964	1.48516e+07	1.37727e+07	14458543	1.46491e+07	-	-
MWS00330g	C5H9NO2	[M+H]+	1-Amino-1-cyclobutane-carboxylic-acid	Amino acids and derivatives	Amino acids and derivatives	22264-50-2	2.40469e+07	2.75032e+07	5.05166e+07	2.59841e+07	2.78485e+07	2.25059e+07	2.74655e+07	2.65885e+07	2.18281e+07	2.89987e+07	2.86646e+07	2.72594e+07	-	-
Hmsp000364	C7H13NO2	[M+H]+	L-Cyclopentylglycine	Amino acids and derivatives	Amino acids and derivatives	2521-84-8	372679	274954	268554	378086	328107	375445	277734	399558	357876	298588	277808	289897	-	-
MWS00327g	C3H7NO3	[M+H]+	L-Isoserine	Amino acids and derivatives	Amino acids and derivatives	632-13-3	962545	170275	598323	930573	621087	705203	636626	647241	709781	746885	783490	729861	-	-
mws3133	C7H11NO4	[M+H]+	Oxaceprol	Amino acids and derivatives	Amino acids and derivatives	33996-33-7	615701	346153	301811	390593	542241	699524	486151	311159	465300	466972	498751	497436	-	-
MWS201408	C9H14N2O7	[M+H]+	Asp-Glu	Amino acids and derivatives	Amino acids and derivatives	6157-06-8	1.26752e+06	1.69298e+06	2.41317e+06	1.07713e+06	1.6127e+06	669890	1.85307e+06	1.85515e+06	880448	1.55753e+06	1.67497e+06	1.58717e+06	-	-
mws0582	C11H19N3O6S	[M+H]+	S-(Methyl)glutathione	Amino acids and derivatives	Amino acids and derivatives	2922-56-7	764360	825096	891924	670600	664868	530819	968746	962569	1.01534e+06	1.00166e+06	1.07673e+06	1.06361e+06	C11347	-
MWS201401	C7H13N3O4	[M+H]+	Ala-Asn	Amino acids and derivatives	Amino acids and derivatives	31796-57-3	1.95005e+06	585565	378967	1.75454e+06	2.04746e+06	1.98808e+06	1.80294e+06	1.64431e+06	2.31932e+06	1.339e+06	1.40281e+06	1.44597e+06	-	-
mws0254	C6H9N3O2	[M+H]+	L-Histidine	Amino acids and derivatives	Amino acids and derivatives	71-00-1	4.79907e+07	1.23116e+08	1.26866e+08	4.69587e+07	6.18279e+07	4.22939e+07	4.31908e+07	4.7205e+07	3.37302e+07	5.91518e+07	6.32215e+07	6.34393e+07	C00135	ko00340,ko00410,ko00470,ko00970,ko01100,ko01110,ko01230,ko02010
mws0250	C9H11NO3	[M+H]+	L-Tyrosine*	Amino acids and derivatives	Amino acids and derivatives	60-18-4	2.64979e+06	1.49356e+06	2.41179e+06	4.45396e+06	3.80562e+06	4.40459e+06	4.99021e+06	5.37467e+06	6.57436e+06	3.92319e+06	4.03829e+06	3.73499e+06	C00082	ko00130,ko00261,ko00350,ko00360,ko00400,ko00460,ko00730,ko00940,ko00950,ko00965,ko00966,ko00970,ko00999,ko01100,ko01110,ko01210,ko01230,ko01240
Zmmp000635	C6H11NO2	[M+H]+	(2S)-2-amino-4-methyl-4-pentenoic acid	Amino acids and derivatives	Amino acids and derivatives	-	1.7044e+06	8.61817e+06	8.03126e+06	1.58017e+06	1.81163e+06	1.28176e+06	1.94979e+06	2.20081e+06	1.6161e+06	3.85401e+06	3.63471e+06	3.57789e+06	-	-
pme0124	C7H12N2O3	[M+H]+	L-Glycyl-L-proline	Amino acids and derivatives	Amino acids and derivatives	704-15-4	242761	141781	122611	319626	302847	319945	355032	239387	350872	224554	241711	239404	-	-
NK10251888	C8H18N4O2	[M+H]+	NG,NG-Dimethyl-L-arginine*	Amino acids and derivatives	Amino acids and derivatives	30315-93-6	7.07479e+06	1.43327e+07	1.45607e+07	4.25199e+06	7.09945e+06	4.23919e+06	3.59579e+06	4.8616e+06	3.19757e+06	6.31967e+06	6.72711e+06	6.80884e+06	C03626	-
pme0021	C9H11NO2	[M+H]+	L-Phenylalanine	Amino acids and derivatives	Amino acids and derivatives	63-91-2	3.8769e+06	6.23553e+06	4.90352e+06	9.30067e+06	7.69639e+06	8.67146e+06	1.06426e+07	1.14072e+07	1.39533e+07	8.78997e+06	8.22857e+06	8.19284e+06	C00079	ko00360,ko00400,ko00460,ko00470,ko00940,ko00960,ko00966,ko00970,ko00996,ko00999,ko01100,ko01110,ko01210,ko01230,ko02010
Zmmp000606	C6H13NO3	[M+H]+	2-Amino-4-hydroxy-3-methylpentanoic acid	Amino acids and derivatives	Amino acids and derivatives	-	2.48764e+06	2.12564e+06	2.03867e+06	2.51501e+06	2.11467e+06	2.04378e+06	2.06996e+06	2.18681e+06	2.26917e+06	2.25227e+06	2.22985e+06	2.08994e+06	-	-
pme0008	C6H13N3O3	[M+H]+	L-Citrulline	Amino acids and derivatives	Amino acids and derivatives	372-75-8	8.61398e+06	7.24858e+06	1.50463e+07	3.56535e+06	5.72369e+06	4.97635e+06	4.8523e+06	4.50438e+06	4.53503e+06	8.15126e+06	7.66639e+06	7.53283e+06	C00327	ko00220,ko01100,ko01110,ko01230
MWSmce190	C6H13NO3	[M+H]+	4-Hydroxy-L-Isoleucine	Amino acids and derivatives	Amino acids and derivatives	781658-23-9	230447	341328	359362	296910	267121	245984	280105	211019	278785	315178	301000	289815	-	-
Zmgn002106	C11H13NO3	[M-H]-	N-Acetyl-L-phenylalanine	Amino acids and derivatives	Amino acids and derivatives	2018-61-3	395742	189754	215771	266472	474970	300309	323551	324716	315398	332817	305737	318814	C03519	ko00360,ko01100
MW0106972	C10H18N2O5S	[M+H]+	Glu-Met	Amino acids and derivatives	Amino acids and derivatives	4423-22-7	157784	2.00348e+06	864315	77049.6	5.10331e+07	100759	131694	145572	75235.9	5.24224e+06	5.6885e+06	5.32361e+06	-	-
pmb0464	C16H27NO14	[M+H]+	L-Aspartic acid-O-diglucoside	Amino acids and derivatives	Amino acids and derivatives	-	110402	1361480	637841	362213	246643	305638	621167	672323	410733	346395	319858	323136	-	-
pme1712	C11H20N2O6	[M-H]-	L-Saccharopine	Amino acids and derivatives	Amino acids and derivatives	997-68-2	259454	2.40937e+06	2.70823e+06	183958	230093	204250	339235	296530	166952	680638	663588	624340	C00449	ko00300,ko00310,ko01100,ko01110,ko01230
Lmbp000123	C6H13NO2S	[M+H]+	L-Homomethionine	Amino acids and derivatives	Amino acids and derivatives	25148-30-5	1.11223e+06	6.45133e+06	2.92858e+06	3.36607e+06	1.06846e+06	2.85182e+06	1.74824e+06	1.60838e+06	1.56411e+06	2.30914e+06	2.52321e+06	2.41469e+06	C17213	ko00966,ko01110,ko01210
MWS201437	C10H18N2O5	[M+H]+	Leu-Asp	Amino acids and derivatives	Amino acids and derivatives	32949-40-9	523205	585640	528833	858308	695197	994294	715849	531129	659695	583328	638153	618410	-	-
MWS0933	C7H11N3O2	[M+H]+	1-Methylhistidine	Amino acids and derivatives	Amino acids and derivatives	332-80-9	1.05887e+06	1.22424e+06	1.08504e+06	933303	855900	869073	879030	905492	836313	1.03455e+06	945042	984236	-	-
pme0116	C9H14N4O3	[M+H]+	L-Carnosine	Amino acids and derivatives	Amino acids and derivatives	305-84-0	237790	233288	147340	219420	264940	289698	235147	293452	218322	212811	233298	224824	C00386	ko00340,ko00410,ko01100
pme2914	C6H10O5	[M-H]-	3-Hydroxy-3-methylpentane-1,5-dioic acid	Amino acids and derivatives	Amino acids and derivatives	503-49-1	3.25561e+06	1.73847e+06	1.75793e+06	5.32339e+06	4.45109e+06	5.60203e+06	7.12589e+06	6.86808e+06	5.50076e+06	4.66728e+06	4.26699e+06	4.3877e+06	C03761	-
pme1286	C14H20N6O5S	[M+H]+	S-(5'-Adenosy)-L-homocysteine	Amino acids and derivatives	Amino acids and derivatives	979-92-0	607939	559195	563385	687910	875716	690731	565448	525842	530233	538858	574106	524205	C00021	ko00270,ko01100,ko01230,ko01240
MWS04447	C6H11NO2	[M+H]+	Homoproline	Amino acids and derivatives	Amino acids and derivatives	56879-46-0	9.13713e+06	1.3359e+07	1.54452e+07	6.62576e+06	9.09497e+06	5.85486e+06	6.45677e+06	7.60972e+06	6.42065e+06	8.80729e+06	9.40485e+06	8.58879e+06	-	-
pme3388	C7H16N4O2	[M+H]+	Homoarginine	Amino acids and derivatives	Amino acids and derivatives	156-86-5	8.59442e+06	4.02041e+06	5.2831e+06	3497435	7045140	6.8825e+06	3316515	4252580	1.25704e+06	2.03376e+06	2.2385e+06	2.16138e+06	C01924	-
Lmrj002087	C10H18N2O5	[M+H]+	L-Isoleucyl-L-Aspartate	Amino acids and derivatives	Amino acids and derivatives	-	486230	239786	330116	742768	565184	655455	651065	617279	618300	603928	618700	561230	-	-
MW0155088	C19H28N6O6	[M+H]+	Phe-Arg-Asp	Amino acids and derivatives	Amino acids and derivatives	-	1.83631e+06	2.68041e+06	2.67983e+06	1.55335e+06	1.83791e+06	1.81388e+06	1.9072e+06	1.7078e+06	1.8167e+06	1.82152e+06	1.85554e+06	2.00088e+06	-	-
mws0219	C4H7NO4	[M-H]-	L-Aspartic Acid	Amino acids and derivatives	Amino acids and derivatives	56-84-8	4.19282e+06	1.40983e+07	1.12295e+07	4.70505e+06	4.57627e+06	4.07294e+06	4.66149e+06	3.02523e+06	2.87717e+06	4.60175e+06	4.93746e+06	5.08258e+06	C00049	ko00220,ko00250,ko00260,ko00261,ko00270,ko00300,ko00340,ko00410,ko00460,ko00470,ko00710,ko00760,ko00770,ko00970,ko00999,ko01100,ko01110,ko01200,ko01210,ko01230,ko01240,ko02010
Rfmb318	C7H14NO2+	[M]+	D-Proline betaine	Amino acids and derivatives	Amino acids and derivatives	1195-94-4	3.05036e+06	2.88821e+06	2.93395e+06	3.42271e+06	3.17719e+06	3.15908e+06	3.2032e+06	2.98294e+06	3.1631e+06	3.44374e+06	3.18325e+06	3.11625e+06	C21514	-
Zbqn002253	C9H17NO5	[M-H]-	6-(((S)-1-carboxyethyl)amino)-4-hydroxyhexanoicacid	Amino acids and derivatives	Amino acids and derivatives	-	3.48783e+06	5.66924e+06	5.65431e+06	4.24444e+06	2.83908e+06	2.65091e+06	3.44226e+06	3.313e+06	3.67676e+06	3.90376e+06	3.5499e+06	3.57439e+06	-	-
MW0107802	C11H20N2O3	[M+H]+	1-(2-Amino-4-methylpentanoyl)pyrrolidine-2-carboxylic acid	Amino acids and derivatives	Amino acids and derivatives	-	7.98772e+06	1.1284e+07	9.50045e+06	9.88613e+06	8.69388e+06	9.96475e+06	8.66262e+06	8.6696e+06	9.01787e+06	8.59895e+06	9.59393e+06	9.20433e+06	-	-
MWS201398	C8H14N2O5	[M+H]+	Hyp-Ser	Amino acids and derivatives	Amino acids and derivatives	-	148203	189153	143954	217208	170244	201712	179376	176548	171977	155572	174378	167520	-	-
mws0256	C5H11NO2	[M+H]+	L-Valine	Amino acids and derivatives	Amino acids and derivatives	72-18-4	2.88838e+06	8.2603e+06	9.36579e+06	5.57191e+06	3.68575e+06	4.33109e+06	5.2629e+06	4.78403e+06	4.07503e+06	5.51645e+06	4.95633e+06	5.05585e+06	C00183	ko00280,ko00290,ko00460,ko00770,ko00966,ko00970,ko01100,ko01110,ko01210,ko01230,ko01240,ko02010
mws0227	C6H13NO2	[M+H]+	L-Leucine*	Amino acids and derivatives	Amino acids and derivatives	61-90-5	723070	1.87229e+06	3.10321e+06	2.06701e+06	1.06585e+06	1.66968e+06	2.14996e+06	1.68338e+06	1.62557e+06	1.77344e+06	1.67015e+06	1.57997e+06	C00123	ko00280,ko00290,ko00966,ko00970,ko01100,ko01110,ko01210,ko01230,ko02010
pme0057	C4H9NO2S	[M+H]+	L-Homocysteine	Amino acids and derivatives	Amino acids and derivatives	6027-13-0	236971	100732	173773	277090	213167	252113	343118	406454	425058	269131	240014	249052	C00155	ko00270,ko00920,ko01100,ko01110,ko01230
mws0263	C5H7NO3	[M-H]-	5-Oxo-L-Proline	Amino acids and derivatives	Amino acids and derivatives	98-79-3	384138	1.46737e+06	1.92375e+06	201857	239674	124503	384556	363521	303683	612765	560985	547845	C01879	ko00480,ko01100
pme3193	C4H7NO3	[M-H]-	N-Acetyl-L-glycine	Amino acids and derivatives	Amino acids and derivatives	543-24-8	71512	219923	31932.3	88168.8	93384.1	84369.9	109750	89073.5	92742.9	116150	102996	112106	-	-
ML10181668	C6H11NO2	[M+H]+	Cycloleucine	Amino acids and derivatives	Amino acids and derivatives	52-52-8	1.51624e+07	3.77991e+07	4.03633e+07	8.68634e+06	1.01894e+07	7.26539e+06	1.14869e+07	1.21052e+07	9.50522e+06	2.07412e+07	1.86754e+07	1.86624e+07	C03969	-
MWSmce585	C4H9NO2	[M+H]+	Methyl 3-aminopropanoate	Amino acids and derivatives	Amino acids and derivatives	4138-35-6	1.45769e+06	4.39628e+06	1.09126e+06	1.06552e+06	1.20992e+06	1.43454e+06	1.39631e+06	1.15899e+06	1.27748e+06	1.83755e+06	1.65939e+06	1.64541e+06	-	-
mws1401	C7H14N2O3	[M+H]+	L-Theanine	Amino acids and derivatives	Amino acids and derivatives	3081-61-6	1.70849e+06	2.09823e+06	1.91923e+06	1.24076e+06	1.59842e+06	1.27553e+06	1.24084e+06	1.39807e+06	1.06546e+06	1.47504e+06	1.30659e+06	1.4457e+06	C01047	-
MWSmce607	C4H9NO3	[M+H]+	DL-Threonine	Amino acids and derivatives	Amino acids and derivatives	80-68-2	602999	802144	700634	601758	552160	450710	570474	508891	576762	574580	510558	520066	-	-
Zmmp002946	C14H18N2O5	[M+H]+	(3-(carboxyamino)-2-methylpropanoyl)phenylalanine	Amino acids and derivatives	Amino acids and derivatives	-	1.62467e+06	8.38439e+06	6.95953e+06	1.82941e+06	2.02817e+07	1.64026e+06	2.43836e+06	2.43817e+06	2.37277e+06	4.75685e+06	5.42636e+06	5.18159e+06	-	-
MWStz103	C15H22N6O5S	[M+H]+	S-(5'-Adenosyl)-L-methionine	Amino acids and derivatives	Amino acids and derivatives	29908-03-0	4.89497e+06	6.54138e+06	6.40631e+06	7.28225e+06	7.7119e+06	8.2179e+06	9.09843e+06	6.91681e+06	7.15911e+06	7.34204e+06	8.37385e+06	8.07106e+06	C00019	ko00261,ko00270,ko00330,ko00908,ko00999,ko01100,ko01110,ko01230,ko01240,ko04122
MW0105879	C15H17N3O5	[M+H]+	Asp-Trp	Amino acids and derivatives	Amino acids and derivatives	71835-79-5	515023	667516	416192	740682	951204	1.02017e+06	324305	639951	395858	606212	605314	679365	-	-
MWS201419	C8H17N3O3	[M+H]+	Lys-Gly	Amino acids and derivatives	Amino acids and derivatives	7563-03-3	1.32352e+07	1.2536e+07	1.36011e+07	1.61608e+07	1.4412e+07	1.5851e+07	1.62516e+07	1.54435e+07	1.48217e+07	1.3144e+07	1.41605e+07	1.50727e+07	-	-
pme3033	C4H9NO2	[M+H]+	N,N-Dimethylglycine	Amino acids and derivatives	Amino acids and derivatives	1118-68-9	2.07897e+06	7.6401e+06	1.66612e+06	1.78982e+06	1.86587e+06	2.48443e+06	2.23595e+06	2.19981e+06	2.37713e+06	2.62862e+06	2.635e+06	2.95802e+06	C01026	ko00260,ko01100
MWS201455	C10H19N3O5	[M+H]+	Asp-Lys	Amino acids and derivatives	Amino acids and derivatives	5891-51-0	244415	342080	121906	167094	170304	325212	169763	144708	189385	136007	139439	154616	-	-
MWS20966	C7H15N3O2S	[M+H]+	S-methyl-L-thiocitrulline	Amino acids and derivatives	Amino acids and derivatives	209589-59-3	535141	389827	400022	435106	485266	511637	506422	534535	413222	406560	464521	422857	-	-
MWS1771	C10H13NO3	[M+H]+	L-Tyrosine methyl ester	Amino acids and derivatives	Amino acids and derivatives	1080-06-4	230916	81708.5	94261.1	334529	150886	173921	119048	147697	326007	327293	304456	284270	C03404	-
Lmhp001670	C11H22N2O3	[M+H]+	L-Valyl-L-Leucine	Amino acids and derivatives	Amino acids and derivatives	3989-97-7	97628.5	45412.6	70528.3	82280.3	86228.5	97231.8	123375	86602.8	94495.4	84422.6	80198.3	92181.1	-	-
Zmmp002167	C14H18N2O6	[M+H]+	2-((L-tyrosyl)oxy)-5-amino-5-oxopentanoic acid	Amino acids and derivatives	Amino acids and derivatives	-	836667	1.85683e+06	2.58047e+06	1.28856e+06	2.00237e+06	1.48848e+06	1.83326e+06	1.7086e+06	1.75793e+06	1.4446e+06	1.56372e+06	1.66877e+06	-	-
pme2563	C8H14N2O5S	[M-H]-	γ-Glu-Cys	Amino acids and derivatives	Amino acids and derivatives	636-58-8	66977.1	98230.4	105762	91979.5	41149.7	80005	53350.9	76593.5	55164.4	65690.1	68922.1	59595.5	C00669	ko00480,ko01100,ko01240
MWS201443	C9H19N3O4	[M+H]+	Ser-Lys	Amino acids and derivatives	Amino acids and derivatives	22677-61-8	251806	253334	144986	287603	172551	244385	252934	257623	216033	236434	273698	258993	-	-
pme1086	C10H17N3O6S	[M-H]-	Glutathione reduced form	Amino acids and derivatives	Amino acids and derivatives	70-18-8	6.16641e+06	1.21194e+07	1.04122e+07	8.52252e+06	5.39781e+06	8.6951e+06	7.24966e+06	7.48628e+06	8.12943e+06	8.30311e+06	8.05756e+06	7.17039e+06	C00051	ko00270,ko00480,ko01100,ko01240,ko02010
pme0026	C6H14N2O2	[M+H]+	L-Lysine	Amino acids and derivatives	Amino acids and derivatives	56-87-1	5.47336e+06	1.52635e+07	1.29086e+07	2.69011e+06	3.39432e+06	2.442e+06	3.20352e+06	3.15952e+06	2.38447e+06	6.99638e+06	6.01334e+06	6.38598e+06	C00047	ko00300,ko00310,ko00470,ko00780,ko00960,ko00970,ko01100,ko01110,ko01210,ko01230,ko02010
mws0282	C11H12N2O2	[M-H]-	L-Tryptophan	Amino acids and derivatives	Amino acids and derivatives	73-22-3	2.22557e+06	6.09897e+06	1.37587e+07	1.52103e+07	7.2678e+06	1.38307e+07	1.58037e+07	7.78391e+06	1.18904e+07	1.01289e+07	8.81008e+06	1.00678e+07	C00078	ko00260,ko00380,ko00400,ko00901,ko00966,ko00970,ko00996,ko00999,ko01100,ko01110,ko01210,ko01230,ko01240
pmb0034	C10H16N2O7	[M+H]+	L-α-Glutamyl-L-Glutamic Acid	Amino acids and derivatives	Amino acids and derivatives	3929-61-1	1.27266e+06	3.83828e+06	4.22809e+06	956441	908012	731547	1.33048e+06	1.07987e+06	820523	1.53726e+06	1.78619e+06	1.72904e+06	C01425	-
Wcdp000380	C5H13NO	[M+H]+	L-Valinol	Amino acids and derivatives	Amino acids and derivatives	2026-48-4	1.33101e+07	4.49191e+07	9.05927e+06	1.19638e+07	1.2608e+07	1.62401e+07	1.39892e+07	1.20628e+07	1.60535e+07	1.83219e+07	1.56603e+07	1.74657e+07	-	-
mws5042	C11H14N2O3	[M+H]+	L-Glycyl-L-phenylalanine*	Amino acids and derivatives	Amino acids and derivatives	721-66-4	210353	230974	255107	432253	389727	493584	336757	474062	591417	396867	358299	339702	-	-
pme0014	C5H9NO4	[M+H]+	L-Glutamic acid	Amino acids and derivatives	Amino acids and derivatives	56-86-0	2.35794e+06	2.10596e+06	1.76936e+06	2.42425e+06	1.91392e+06	2.01865e+06	1.97822e+06	2.24589e+06	2.48028e+06	2.41454e+06	2.0963e+06	2.11931e+06	C00025	ko00220,ko00250,ko00330,ko00332,ko00340,ko00430,ko00470,ko00480,ko00524,ko00630,ko00650,ko00660,ko00860,ko00910,ko00970,ko01100,ko01110,ko01200,ko01210,ko01230,ko01240,ko02010
MW0107009	C9H15N3O6	[M+H]+	Glutamylasparagine	Amino acids and derivatives	Amino acids and derivatives	36314-37-1	298918	539391	453502	264072	335129	268328	256469	184792	243968	309242	363286	331336	-	-
MWS201465	C14H18N2O5	[M+H]+	Glu-Phe	Amino acids and derivatives	Amino acids and derivatives	20556-22-3	136805	152648	195194	263880	190733	246158	207435	207860	189247	175849	207234	195205	-	-
MW0153757	C10H18N2O5S	[M-H]-	Met-Glu	Amino acids and derivatives	Amino acids and derivatives	14517-44-3	113157	118946	125406	232923	162481	234866	137234	151391	113920	153463	130608	138392	-	-
mws1050	C5H9NO4	[M+H]+	O-Acetylserine	Amino acids and derivatives	Amino acids and derivatives	5147-00-2	447705	318448	300416	367140	368259	416257	347429	347389	395691	386925	357859	326586	C00979	ko00270,ko00908,ko00920,ko01100,ko01110,ko01200,ko01230,ko04122
MWS201471	C15H23N3O4	[M+H]+	Lys-Tyr	Amino acids and derivatives	Amino acids and derivatives	35978-98-4	2.66107e+06	4.03286e+06	4.0001e+06	4.96411e+06	2.95671e+06	4.56923e+06	4.10684e+06	3.37128e+06	3.72179e+06	3.26567e+06	3.74896e+06	3.84396e+06	-	-
mws3109	C8H9NO3	[M+H]+	4-Hydroxy-L-phenylglycine	Amino acids and derivatives	Amino acids and derivatives	32462-30-9	106712	63350	55015	132780	28999.8	86965.9	82542.9	93220.9	159971	132600	134910	114863	-	-
Zmdp000972	C4H9NO2S	[M+H]+	S-Methyl-L-cysteine	Amino acids and derivatives	Amino acids and derivatives	1187-84-4	5.80277e+06	3.50726e+06	5.53086e+06	1.01715e+07	8.70875e+06	9.52779e+06	1.06653e+07	1.20253e+07	1.37802e+07	7.90267e+06	9.41182e+06	8.51368e+06	C22040	ko02010
mws0715	C13H16N2O4	[M-H]-	Phenylacetyl-L-glutamine	Amino acids and derivatives	Amino acids and derivatives	28047-15-6	21112.3	30551.7	23900	14780.6	11973.4	40023.4	36877.7	27315.3	47358	36043.4	38224.2	43011	C04148	ko00360
MWS1926	C6H13NO2	[M+H]+	DL-Leucine*	Amino acids and derivatives	Amino acids and derivatives	328-39-2	570604	1.42582e+06	2.50357e+06	1.94808e+06	953236	1.59704e+06	1.63054e+06	1.62697e+06	1.49241e+06	1.46157e+06	1.6232e+06	1.35492e+06	-	-
mws1587	C6H13NO2	[M+H]+	L-Norleucine*	Amino acids and derivatives	Amino acids and derivatives	327-57-1	570604	1.42582e+06	2.50357e+06	1.94808e+06	953236	1.59704e+06	1.63054e+06	1.62697e+06	1.49241e+06	1.46157e+06	1.6232e+06	1.35492e+06	C01933	-
MWS00411g	C6H11NO4	[M+H]+	L-2-Aminoadipate	Amino acids and derivatives	Amino acids and derivatives	1118-90-7	150668	161775	68736.4	146570	162992	175739	125780	153128	135099	138690	158608	165929	-	-
mws0712	C5H9NO3	[M-H]-	N-Propionylglycine	Amino acids and derivatives	Amino acids and derivatives	21709-90-0	307791	398766	308355	361939	385033	357519	374094	320243	309132	378435	325239	322792	-	-
pme0193	C5H10N2O3	[M+H]+	L-Glutamine	Amino acids and derivatives	Amino acids and derivatives	56-85-9	4.81314e+06	1.52553e+07	12216636	2.45197e+06	3.5338e+06	2.46506e+06	2.8854e+06	3.16493e+06	2.24632e+06	7.44106e+06	6.32486e+06	6.38023e+06	C00064	ko00220,ko00230,ko00240,ko00250,ko00470,ko00630,ko00750,ko00910,ko00970,ko01100,ko01230,ko01232,ko01240,ko02010
pme0170	C8H16N4O3	[M+H]+	N-Acetyl-L-Arginine	Amino acids and derivatives	Amino acids and derivatives	155-84-0	2.56364e+06	2.73424e+06	1.4349e+06	2.13376e+06	1.68955e+06	1.50975e+06	1.94629e+06	1.76428e+06	1.77254e+06	1.60473e+06	1.76795e+06	1.46265e+06	-	-
MWS201387	C10H20N6O4	[M+H]+	Asn-Arg	Amino acids and derivatives	Amino acids and derivatives	2478-01-5	282669	230446	259669	221977	314146	241632	337950	314559	323949	296192	251633	252825	-	-
MWS20987	C7H15N3O2	[M+H]+	N5-(1-Iminoethyl)-L-ornithine	Amino acids and derivatives	Amino acids and derivatives	36889-13-1	1.33094e+06	346290	393805	945374	1.42554e+06	1.02907e+06	726768	781031	1.21567e+06	734946	888743	841355	-	-
pmb2857	C11H19NO9	[M-H]-	L-Glutamic acid-O-glycoside	Amino acids and derivatives	Amino acids and derivatives	-	111350	187368	216020	148416	87340.4	95386.2	87888.1	93704.5	88340.6	113585	125575	103471	-	-
pmb2591	C13H14N2O3	[M-H]-	N-Acetyl-L-Tryptophan	Amino acids and derivatives	Amino acids and derivatives	1218-34-4	434375	473022	345231	358122	380242	324136	380313	438371	398619	338550	404326	405137	-	-
Zazp002547	C11H12N2O2	[M+H]+	cyclo-(Gly-Phe)	Amino acids and derivatives	Amino acids and derivatives	10125-07-2	587650	1.24308e+06	1.99542e+06	3.26704e+06	1.82545e+06	3.07738e+06	3.75786e+06	2.23258e+06	3.57274e+06	2.77047e+06	2.34918e+06	2.32775e+06	-	-
MWS201447	C12H16N2O3	[M+H]+	Phe-Ala	Amino acids and derivatives	Amino acids and derivatives	3918-87-4	61963.5	56231.1	96705	64467.4	70088.4	66383.5	87637.1	73861.8	76389	51293.6	62829	57615.2	-	-
MWS4309	C13H15N3O3	[M+H]+	Glycyl-tryptophan	Amino acids and derivatives	Amino acids and derivatives	2390-74-1	140817	194318	85030	209190	179049	175913	219657	179936	159549	200575	163398	188490	-	-
ZbWp002423	C10H13NO2	[M+H]+	N-methylphenylalanine	Amino acids and derivatives	Amino acids and derivatives	-	559060	986331	672142	1.14921e+06	1.04323e+06	1.14751e+06	841459	908590	900945	935434	1.00929e+06	820358	-	-
MWS2010	C9H10N2O5	[2M-H]-	3-nitro-L-tyrosine	Amino acids and derivatives	Amino acids and derivatives	621-44-3	214909	288685	296685	159836	245937	220611	158656	187870	124250	229347	189303	227706	-	-
mws5035	C15H22N2O3	[M+H]+	L-Leucyl-L-phenylalanine	Amino acids and derivatives	Amino acids and derivatives	56217-82-4	74857.8	52765.3	74161	77341.7	85563.5	78023.4	85705.7	67892.6	108761	65923.1	80025	79574.6	-	-
MW0107019	C10H16N2O5	[M+H]+	Glutamylproline	Amino acids and derivatives	Amino acids and derivatives	41745-47-5	2.32592e+06	2.35155e+06	2.16851e+06	2.32748e+06	2.34259e+06	2.39528e+06	2.21825e+06	2.30018e+06	2.09771e+06	2.00711e+06	2.32892e+06	2.48352e+06	-	-
MWS201381	C14H17N3O4	[M+H]+	Ser-Trp	Amino acids and derivatives	Amino acids and derivatives	94421-70-2	199370	198793	219380	116720	262610	346103	185436	248962	201832	172000	198879	214025	-	-
pme3382	C6H11NO4	[M-H]-	N-Acetyl-L-threonine	Amino acids and derivatives	Amino acids and derivatives	17093-74-2	173988	557565	363724	156567	158449	283539	137894	150802	183727	187641	226092	188309	-	-
Lmqp000427	C6H11NO3	[M+H]+	N-Methyl-Trans-4-Hydroxy-L-Proline*	Amino acids and derivatives	Amino acids and derivatives	4252-82-8	304350	331746	327544	292629	303242	307649	246502	271700	316772	280635	341013	285933	-	-
pme2074	C18H29NO4	[M-H]-	Jasmonoyl-L-Isoleucine	Amino acids and derivatives	Amino acids and derivatives	120330-93-0	554273	30527.2	17324.6	50904.4	24615.3	82653.1	29659.4	10162.5	32814.5	92778.8	74676.4	81187.7	C18699	ko04075
MW0109387	C11H16N4O3	[M+CH3COO]-	Prolylhistidine	Amino acids and derivatives	Amino acids and derivatives	-	5.27852e+06	1.12004e+07	5.9556e+06	5.24357e+06	3.37452e+06	6.38065e+06	4.47712e+06	4.87754e+06	4.27116e+06	6.13938e+06	5.33074e+06	6.67766e+06	-	-
Zmdn001564	C14H18N2O5	[M-H]-	γ-Glutamylphenylalanine	Amino acids and derivatives	Amino acids and derivatives	7432-24-8	113255	502857	478293	120628	1.05012e+06	101578	141325	119364	147102	338580	370504	295473	-	-
Zmdp000976	C7H13NO4S	[M+H]+	S-(2-Carboxypropyl)cysteine	Amino acids and derivatives	Amino acids and derivatives	6852-42-2	126966	270390	258346	172130	153828	119719	145777	104873	135011	139260	142191	170689	-	-
MWS201451	C11H18N4O3	[M+H]+	Val-His	Amino acids and derivatives	Amino acids and derivatives	13589-07-6	47320.1	56360.7	53594.8	42590.3	59449.8	61931.1	75783	71169.3	64161.9	35125.5	44251.6	41608.7	-	-
pme2559	C6H9NO5	[M-H]-	N-Acetyl-L-Aspartic Acid	Amino acids and derivatives	Amino acids and derivatives	997-55-7	66244.7	48317.8	21234.2	57343	102853	61458.3	35649.6	74242	67207.9	61176	66941.5	52625.5	C01042	ko00250,ko01100
Zmdp002216	C11H20N2O5	[M+H]+	L-γ-Glutamyl-L-leucine	Amino acids and derivatives	Amino acids and derivatives	2566-39-4	582943	3.60144e+06	2.72149e+06	588762	9.94327e+06	565759	667853	691698	495755	2.16055e+06	1.70979e+06	2.0744e+06	-	-
MWS04491	C5H7NO2	[M+H]+	3,4-Dehydro-DL-proline	Amino acids and derivatives	Amino acids and derivatives	3395-35-5	188044	148397	98195.8	181058	188622	184100	132442	76573.8	150650	157222	142009	123232	-	-
MWS4296	C11H14N2O3	[M+H]+	Glycylphenylalanine*	Amino acids and derivatives	Amino acids and derivatives	3321-03-7	270236	226558	254821	357522	320039	543036	503399	431303	385399	265420	324917	337292	-	-
MWS201428	C7H12N2O5	[M+H]+	Gly-Glu	Amino acids and derivatives	Amino acids and derivatives	7412-78-4	53885.5	36112.7	17587.6	56973.5	36435.8	59121.5	49230.9	66376	34959.8	34635.1	44729.3	41774	-	-
MWStz091	C8H12N2O2	[M+H]+	Cyclo(L-Ala-L-Pro)	Amino acids and derivatives	Amino acids and derivatives	36357-32-1	18779.9	47420	26759	52539.4	17801.3	55828.4	34525.1	29097.2	46640.6	42147.2	35646.3	32851.1	-	-
MWS201424	C10H19N3O4	[M+H]+	Ile-Asn	Amino acids and derivatives	Amino acids and derivatives	59652-59-4	44879	40498.3	65384.1	77130.3	59803.5	59094.1	76606.8	52783.3	60979.1	45418	49752.2	58523.8	-	-
mws0629	C13H16N2O5	[M+H]+	L-Aspartyl-L-Phenylalanine	Amino acids and derivatives	Amino acids and derivatives	13433-09-5	237765	310755	333218	271930	248322	255076	263032	122451	270795	257889	201815	213211	-	-
MWSmce706	C5H8N2O2	[M+H]+	Cyclo(Ala-Gly)	Amino acids and derivatives	Amino acids and derivatives	4526-77-6	2.27815e+06	3.39716e+06	2.48138e+06	2.43498e+06	2.29651e+06	721869	2.08127e+06	2.06795e+06	1.30466e+06	2.3677e+06	1.82401e+06	2.25968e+06	-	-
pme0122	C8H16N2O3	[M+H]+	N6-Acetyl-L-lysine	Amino acids and derivatives	Amino acids and derivatives	692-04-6	1.60381e+06	2.15524e+06	2.46365e+06	1.01054e+06	2.47439e+06	1.00687e+06	1.10242e+06	1.06053e+06	722506	1.09042e+06	1.4373e+06	1.29223e+06	C02727	ko00310,ko01100
MWS201477	C8H16N2O5	[M+H]+	Thr-Thr	Amino acids and derivatives	Amino acids and derivatives	-	76078.8	74084.4	62731.8	97886.7	76612.9	78613.5	91048.9	68747.7	73837.5	79853.9	77454.7	61164.6	-	-
pme2890	C8H16N2O4S2	[M+H]+	L-Homocystine	Amino acids and derivatives	Amino acids and derivatives	626-72-2	154617	42682.3	95897.8	122708	134380	115735	119109	127787	87596.6	110316	139793	109135	C01817	ko00270
MWS201439	C15H18N4O3	[M+H]+	Phe-His	Amino acids and derivatives	Amino acids and derivatives	16874-81-0	126289	190397	152187	115488	78802.5	88105.3	91458.1	138966	97653.2	126914	170502	143397	-	-
pmf0512	C2H3NO3	[M-H]-	Oxamic acid	Amino acids and derivatives	Amino acids and derivatives	471-47-6	78369.4	76636.7	83840.9	72925	63745.2	77534.4	95473	80798.4	68937.8	83649	63405.9	83025	C01444	ko00230,ko01100
mws0520	C11H13NO4	[M+H]+	N-Acetyl-L-tyrosine	Amino acids and derivatives	Amino acids and derivatives	537-55-3	49888.9	131820	66163.6	96705	37950.8	85030	44488.7	93370	34176.8	58022.2	76406.4	61274.2	-	-
MWS20633g	C9H12NO6P	[M+H]+	O-phosphate-L-tyrosine	Amino acids and derivatives	Amino acids and derivatives	21820-51-9	254739	318908	302141	274986	257920	321215	247969	314382	389783	278286	238166	322725	C06501	-
MWS201461	C12H25N5O3	[M+H]+	Leu-Arg	Amino acids and derivatives	Amino acids and derivatives	26607-15-8	217752	221329	225626	281625	317172	271317	316555	273641	243404	266803	206154	275625	-	-
MWSmce251	C16H15NO4	[M+H]+	N-Benzoyl-(2R,3S)-3-phenylisoserine	Amino acids and derivatives	Amino acids and derivatives	132201-33-3	80690.5	212216	226061	151812	163927	213341	189283	137481	175899	178288	135369	181402	-	-
mws0875	C5H10N2O3S	[M+H]+	L-Cysteinyl-L-glycine	Amino acids and derivatives	Amino acids and derivatives	19246-18-5	1.7871e+06	1.95981e+06	2.08976e+06	2.91591e+06	1.66567e+06	2.24855e+06	1.47743e+06	1.87443e+06	2.1341e+06	2.49712e+06	3.09043e+06	2.23088e+06	C01419	ko00480,ko01100
MWS201483	C14H18N2O4	[M+H]+	Phe-Hyp	Amino acids and derivatives	Amino acids and derivatives	90965-82-5	39989.2	69197.9	88223.9	96106	118815	119539	163257	158571	231530	88048.8	105550	125703	-	-
mws5041	C8H16N2O3	[M+H]+	L-Glycyl-L-isoleucine	Amino acids and derivatives	Amino acids and derivatives	19461-38-2	98752.4	90428.7	83228.2	86814.6	193530	137913	79243	75702.9	212205	122249	95493	87556.2	-	-
MWSmce056	C11H12N2O2	[M+H]+	DL-Tryptophan	Amino acids and derivatives	Amino acids and derivatives	54-12-6	612224	1.22405e+06	2.2634e+06	3.38472e+06	1.7092e+06	3.45912e+06	3.73094e+06	2.51965e+06	3.22843e+06	2.80913e+06	1.95152e+06	2.39572e+06	-	-
mws0221	C6H12N2O4S2	[M+H]+	L-Cystine	Amino acids and derivatives	Amino acids and derivatives	56-89-3	56374	139284	98481	151622	100515	162860	93212.8	55262.3	59457	114556	83263.5	87005	C00491	ko00270,ko01100,ko02010
MWS201405	C15H18N4O4	[M+H]+	His-Tyr	Amino acids and derivatives	Amino acids and derivatives	35979-00-1	166412	99699	64373.8	108854	111005	192565	49278.1	174537	93020.1	74332.8	104909	82649.5	-	-
MWS201464	C15H23N3O3	[M+H]+	Lys-Phe	Amino acids and derivatives	Amino acids and derivatives	6235-35-4	207982	233215	212068	133076	205152	156630	147292	184962	139624	161973	201231	139580	-	-
MWS201430	C9H18N2O4S	[M+H]+	Met-Thr	Amino acids and derivatives	Amino acids and derivatives	40883-16-7	21475.2	14999.6	22271.9	24697.9	20776.4	23806.1	28340	16414.9	30285.6	23028.7	19545.5	15722.2	-	-
MWS04515	C11H20N4O6	[M+H]+	Nopaline	Amino acids and derivatives	Amino acids and derivatives	22350-70-5	147974	118323	103620	109417	83219.8	120548	101740	155216	59714.8	147126	102212	112669	C01682	ko00330,ko01100,ko02010
MWS0994	C10H16N4O10	[M-H]-	N-Carbamoyl-L-aspartate	Amino acids and derivatives	Amino acids and derivatives	13184-27-5	20867.3	16830.4	20019	8129.42	17284.6	21770.9	16631.2	14119.6	10463.2	17239.8	15013.5	21950.6	C00438	ko00240,ko00250,ko01100,ko01240
MWS201397	C10H18N2O4	[M+H]+	Hyp-Val	Amino acids and derivatives	Amino acids and derivatives	-	119217	130042	117086	89280.6	395738	124364	103966	44866.6	47605.4	120696	176768	138454	-	-
mws5037	C9H18N2O3	[M+H]+	L-Alanyl-L-leucine	Amino acids and derivatives	Amino acids and derivatives	3303-34-2	150140	170524	178487	239924	140416	225378	122515	212991	181478	161011	126840	109420	-	-
Lcsp002417	C14H27N3O5	[M+H]+	Ser-Val-Leu	Amino acids and derivatives	Amino acids and derivatives	-	166622	633075	250563	256484	329613	117569	290982	252004	256890	183113	254650	272591	-	-
MWS0132	C20H32N6O12S2	[M-H]-	Oxiglutatione	Amino acids and derivatives	Amino acids and derivatives	27025-41-8	132440	549926	241948	283958	886619	275693	227596	174934	252199	324903	475459	489536	C00127	ko00480,ko01100,ko01240
pme1228	C11H12N2O3	[M+H]+	5-Hydroxy-L-tryptophan	Amino acids and derivatives	Amino acids and derivatives	4350-09-8	151652	446682	376514	475385	288945	527119	192267	402014	246169	296740	235267	191655	C00643	ko00380,ko01100
MWS201480	C12H16N2O4	[M+H]+	Tyr-Ala	Amino acids and derivatives	Amino acids and derivatives	730-08-5	113382	109515	76918.8	104545	136476	94626.4	85324.3	139575	112761	83727.1	124624	88663.2	-	-
Lmhp002031	C12H24N2O3	[M+H]+	L-Leucyl-L-Leucine	Amino acids and derivatives	Amino acids and derivatives	3303-31-9	93370	71589.3	83365	56636.2	45844.8	81695	63693	80025	60798.2	45350.2	65690.7	71609	-	-
mws0805	C11H19NO9	[M-H]-	N-Acetylneuraminic acid	Amino acids and derivatives	Amino acids and derivatives	131-48-6	44976.6	61325.4	40067.3	51680	22670	33426.8	34528	23006.8	15283.4	49807.2	31257.1	44615.1	C00270	ko00520,ko01100,ko01250
MWS1933	C10H11NO3	[M+H]+	N-(2-Methylbenzoyl)glycine	Amino acids and derivatives	Amino acids and derivatives	42013-20-7	243631	138767	225149	226763	223472	229711	165431	202007	206004	179747	281950	201198	-	-
Lmbn000121	C4H6N2O2	[M-H]-	3-Cyano-L-alanine	Amino acids and derivatives	Amino acids and derivatives	6232-19-5	6984.19	14425	21879.5	3340	5590.79	11670	1400.8	10005	4190.79	4191.19	6051.66	6985.58	C02512	ko00460,ko01100,ko01110
MWStz083	C10H16N2O2	[M+H]+	Cyclo(D-Val-L-Pro)	Amino acids and derivatives	Amino acids and derivatives	27483-18-7	71690	43037.4	30938.8	70020	37445.6	21506.5	50015	34282.7	47136.9	20063.1	32275.8	22951.2	-	-
pme1419	C6H13NO2S	[M+H]+	L-Methionine methyl ester	Amino acids and derivatives	Amino acids and derivatives	10332-17-9	213796	217072	205648	144803	175361	250848	261819	118424	106078	280738	267938	165722	-	-
MWS201421	C14H20N2O3S	[M+H]+	Met-Phe	Amino acids and derivatives	Amino acids and derivatives	14492-14-9	11453.4	11447.7	14788.1	10116.1	3340	12754.2	6737.4	3372.7	5396.72	16160.1	15459.1	9422.04	-	-
MWS201442	C13H18N2O4	[M+H]+	Phe-Thr	Amino acids and derivatives	Amino acids and derivatives	51352-44-4	86838.6	75362.9	87730.3	77110.5	71010.9	93429.1	77146.4	64927.7	93743.2	57063.2	100988	84624.8	-	-
MWStz170	C11H18N2O3	[M+H]+	Cyclo(L-Leu-trans-4-hydroxy-L-Pro)	Amino acids and derivatives	Amino acids and derivatives	115006-86-5	15226.3	33340	38345	13340	28340	23340	11670	8340	30010	18354.4	30010	20005	-	-
MWS201426	C8H16N2O3S	[M+H]+	Ala-Met	Amino acids and derivatives	Amino acids and derivatives	14486-05-6	95908.3	56337.7	32868.5	62140.1	152666	84815.1	103819	117159	82502.1	121611	150420	81471	-	-
mws4176	C12H16N2O3	[M+H]+	L-Alanyl-L-Phenylalanine	Amino acids and derivatives	Amino acids and derivatives	3061-90-3	90636.2	31347.5	47518.7	56006.1	41680	44197	76441.6	39576.5	98474.9	69411.9	49593	38851.4	-	-
pme2602	C3H8NO6P	[M-H]-	O-Phospho-L-serine	Amino acids and derivatives	Amino acids and derivatives	407-41-0	96970.1	318619	110194	169964	91653.1	83431.7	53628.9	52158	98231.9	27732.8	50022.8	49083	C01005	ko00260,ko00270,ko00970,ko01100,ko01110,ko01200,ko01230
MWS4471	C6H10N2O4	[M-H]-	N-Alpha-Acetyl-L-Asparagine	Amino acids and derivatives	Amino acids and derivatives	4033-40-3	325180	21357	240458	133344	243628	89658.4	196309	178088	234432	176986	256146	138655	-	-
Zbqp002414	C11H20N2O5	[M+H]+	h-gamma-Glu-leu-oh	Amino acids and derivatives	Amino acids and derivatives	-	69517.9	600305	586472	57584.5	1.7396e+06	84558.8	211830	106430	118675	361666	600756	348119	-	-
pmb0962	C10H22N2O4	[M+H]+	L-Lysine-Butanoic Acid	Amino acids and derivatives	Amino acids and derivatives	80407-71-2	28340	36675	48345	38880.3	42874.3	50647.3	21902.6	42479.9	50032.2	31445.3	57812.9	36804.2	-	-
Zbqn004590	C11H13NO3	[M-H]-	N-(acetyl)phenylalanine	Amino acids and derivatives	Amino acids and derivatives	-	17694.3	28340	15254.9	18329.2	23784.3	10374.3	29344.3	12204.3	14026.6	17084.9	26224.2	14026.6	-	-
Cmsn000131	C5H8N2O5	[M-H]-	Dencichin	Amino acids and derivatives	Amino acids and derivatives	5302-45-4	22572.1	39850.7	19725.9	21089	28320.4	21097.2	26838.2	10022.5	14937.6	18456.3	16770.6	30098	C04209	-
pme0253	C8H15NO3	[M+H]+	N-Acetyl-L-leucine	Amino acids and derivatives	Amino acids and derivatives	1188-21-2	30010	126730	31675	38345	45164	33994.6	48401.5	40010	45010	65020	31571.8	45010	C02710	-
MWSprf117	C11H12N2O3	[M+H]+	5-Hydroxy-DL-tryptophan(5-HTP)	Amino acids and derivatives	Amino acids and derivatives	56-69-9	55949.2	207116	170607	209522	175975	235841	115297	103458	195645	159450	79156.3	184091	C01017	-
Lmhp002001	C14H20N2O3	[M+H]+	L-Valyl-L-Phenylalanine	Amino acids and derivatives	Amino acids and derivatives	3918-92-1	63582.2	60593.2	45325.2	52933.4	68476.6	74832.3	79585.1	67037.5	64231.7	61211.1	52714.8	26043.9	-	-
MWStz261	C11H18N2O2	[M+H]+	Cyclo(D-Leu-L-Pro)	Amino acids and derivatives	Amino acids and derivatives	36238-67-2	13340	21675	4013.21	6437.63	16103.3	8024.01	7222.81	5618.01	5005	7082.33	13340	16675	-	-
pme2758	C5H9NO5	[M-H]-	4-Hydroxy-L-glutamic acid	Amino acids and derivatives	Amino acids and derivatives	3913-68-6	125385	112188	97350.9	55308.9	105088	91699.4	37391.6	90425.9	80951.5	108614	80371.1	46568.9	C03079	-
MWSslk140	C7H13NO3S	[M+H]+	N-Acetyl-L-Methionine	Amino acids and derivatives	Amino acids and derivatives	65-82-7	25005	20072.5	22014.5	27244.8	22698.2	43345	31675	21675	14916.2	20755.1	24607.1	9946.47	C02712	-
mws0217	C2H5NO2	[M+H]+	L-Glycine	Amino acids and derivatives	Amino acids and derivatives	56-40-6	81016.2	110098	104435	158366	80874.1	123558	94034.3	92106.4	121226	155044	89868.2	71292.9	C00037	ko00230,ko00260,ko00310,ko00440,ko00460,ko00470,ko00480,ko00630,ko00730,ko00785,ko00860,ko00970,ko01100,ko01110,ko01200,ko01230,ko01240,ko02010
MWS20627g	C9H12N2O2	[M+H]+	L-Tyrosinamide	Amino acids and derivatives	Amino acids and derivatives	4985-46-0	72276.3	36434.2	41561	36675	80941.8	74951.8	24036.7	33317.8	57393.5	49975.7	33696.8	80370.7	-	-
MWS201400	C16H21N3O3	[M+H]+	Val-Trp	Amino acids and derivatives	Amino acids and derivatives	24587-37-9	37829.5	28318.1	81695	50001.9	76690	33081	42453.1	107408	36478.1	40010	46680	86271.9	-	-
pmf0470	C5H9NO3	[M+H]+	cis-4-Hydroxy-D-proline	Amino acids and derivatives	Amino acids and derivatives	2584-71-6	3.21616e+07	197898985	285080445	203704765	79370825	172841965	236046665	7.50091e+07	183621285	7.31339e+07	174543465	194248645	C03440	ko00470,ko01100
Zbqn004682	C14H14N2O5	[M-H]-	N-(malonyl)tryptophan	Amino acids and derivatives	Amino acids and derivatives	-	6.56363e+06	6.93285e+06	4.57754e+06	4.17745e+06	8.93003e+06	7.03173e+06	6.56209e+06	7.82403e+06	4.98245e+06	9.25658e+06	3.28149e+06	7.20168e+06	-	-
MWS201458	C15H22N2O3	[M+H]+	Phe-Ile	Amino acids and derivatives	Amino acids and derivatives	22951-94-6	45010	56685	23340	20146	61685	60020	11417.4	17459.4	51680	75025	65020	25519.4	-	-
Hmhp002834	C20H19O10+	[M]+	Cyanidin 3-xyloside	Flavonoids	Anthocyanidins	29761-24-8	4.81887e+07	1.99871e+07	2.96027e+07	7.36227e+07	1.06779e+08	7.19933e+07	1.13121e+08	6.88059e+07	4.74731e+07	6.12305e+07	5.91896e+07	6.04249e+07	-	-
Lmjp001367	C26H29O15+	[M]+	Cyanidin-3-O-(2''-O-xylosyl)galactoside	Flavonoids	Anthocyanidins	-	2.97898e+07	1.80864e+07	1.45676e+07	1.64082e+07	2.87573e+07	1.80497e+07	1.53657e+07	1.05602e+07	7.54034e+06	1.64796e+07	1.73035e+07	17424963	-	-
Smlp002877	C21H21O10+	[M]+	Peonidin-3-O-arabinoside	Flavonoids	Anthocyanidins	-	5.34651e+06	5.42017e+06	9.66707e+06	3.57229e+06	5.86269e+06	4.26944e+06	4.70422e+06	2.95647e+06	2.38888e+06	4.86099e+06	5.27542e+06	4.92158e+06	-	-
pmf0027	C21H21O11+	[M]+	Cyanidin-3-O-galactoside*	Flavonoids	Anthocyanidins	142506-26-1	6.94337e+07	2.93727e+07	5.98713e+07	5.83252e+07	1.17395e+08	5.70225e+07	9.89555e+07	8.01459e+07	4.78873e+07	6.05179e+07	7.09733e+07	6.5024e+07	C08647	-
pmb0550	C21H21O11+	[M]+	Cyanidin-3-O-glucoside (Kuromanin)*	Flavonoids	Anthocyanidins	47705-70-4	6.94337e+07	2.93727e+07	5.98713e+07	5.83252e+07	1.17395e+08	5.70225e+07	9.89555e+07	8.01459e+07	4.78873e+07	6.05179e+07	7.09733e+07	6.5024e+07	C08604	ko00942,ko01110
HJN055	C21H24O10	[M-H]-	Dihydrocharcone-4'-O-glucoside	Flavonoids	Chalcones	-	5.40352e+06	4.00018e+06	5.02463e+06	4.17824e+06	6.08494e+06	5.5871e+06	4.98867e+06	5.47296e+06	4.8268e+06	5.01088e+06	5.06257e+06	4.95893e+06	-	-
pme2960	C15H12O5	[M+H]+	Naringenin chalcone; 2',4,4',6'-Tetrahydroxychalcone	Flavonoids	Chalcones	73692-50-9	1.06798e+06	828685	871067	1.44157e+06	2.19466e+06	1.89833e+06	1.46235e+06	1.06516e+06	1.02351e+06	1.25957e+06	1.29876e+06	1.31217e+06	C06561	ko00941,ko01100,ko01110
Lmjp003402	C21H24O8	[M+H]+	2'-Hydroxy-3,4,5,3',4',6'-hexameth-oxychalcone	Flavonoids	Chalcones	-	841191	324603	567277	790893	1.35736e+06	914111	709729	662780	513868	832650	775745	803864	-	-
Wagp010556	C18H18O6	[M+H]+	2',4'-Dihydroxy-2,3',6'-Trimethoxychalcone*	Flavonoids	Chalcones	100079-39-8	2.42142e+07	1.84305e+07	2.19137e+07	1.99345e+07	2.33289e+07	3.22103e+07	2.11935e+07	2.99224e+07	2.64531e+07	2.15212e+07	2.2792e+07	2.30229e+07	-	-
mws2118	C21H24O10	[M-H]-	Phloretin-2'-O-glucoside (Phlorizin)	Flavonoids	Chalcones	60-81-1	4.78261e+06	3.04291e+06	2.99584e+06	3.29396e+06	4.49303e+06	4.28832e+06	3.82881e+06	4.26675e+06	3.82767e+06	3.77284e+06	3.95054e+06	4.09151e+06	C01604	ko00941,ko01110
pme1201	C15H14O5	[M-H]-	Phloretin	Flavonoids	Chalcones	60-82-2	285534	116826	95409.8	175842	293143	280058	194000	166267	189107	202060	194185	185094	C00774	ko00941,ko01100,ko01110
Lmfn004093	C21H24O10	[M-H]-	Phloretin-4'-O-glucoside (Trilobatin)	Flavonoids	Chalcones	4192-90-9	2.31329e+07	1.55188e+07	1.71885e+07	2.16336e+07	2.62772e+07	2.33786e+07	2.46874e+07	2.50856e+07	2.18411e+07	2.08599e+07	2.29663e+07	2.20521e+07	-	-
MWSslk030	C28H36O15	[M-H]-	Neohesperidin Dihydrochalcone (Nhdc)	Flavonoids	Chalcones	20702-77-6	148815	115017	205583	103197	159107	164938	105141	51763.5	89945.4	114109	134087	126094	-	-
Labn004865	C21H22O10	[M-H]-	Hydroxy isoliquiritigenin glucoside	Flavonoids	Chalcones	-	3.06265e+07	6.24133e+06	9.1806e+06	1.07107e+07	4.09639e+07	1.71959e+07	3.11509e+07	1.95492e+07	1.21176e+07	1.78233e+07	1.57563e+07	1.47696e+07	-	-
Lasp002993	C26H30O9	[M+H]+	Isobavachalcone glucoside	Flavonoids	Chalcones	-	372155	1.46644e+06	460750	695030	1.32095e+06	614660	1.25038e+06	1.08007e+06	1.2756e+06	1.53018e+06	1.547e+06	1.27208e+06	-	-
Zmpn004068	C26H32O14	[M-H]-	Phloretin-2'-O-(6''-O-xylosyl)glucoside	Flavonoids	Chalcones	-	759996	469528	817301	398657	773290	635561	516134	710594	741236	552591	611682	688221	-	-
Lmjp003722	C20H22O7	[M+H]+	2'-Hydroxy-3,4,5,4',6'-pentamethoxychalcone	Flavonoids	Chalcones	-	118550	83508.3	125582	157425	79989	172816	134864	76863	125139	161623	131600	137398	-	-
Hmpn005101	C21H24O11	[M-H]-	Sieboldin	Flavonoids	Chalcones	18777-73-6	1845215	2.35727e+06	1.19881e+06	1.05906e+06	1.70772e+06	1.11787e+06	1.05177e+06	1.65134e+06	1.38082e+06	1.21594e+06	989177	1.2584e+06	-	-
Hmmn003343	C16H14O5	[M-H]-	Sappanchalcone	Flavonoids	Chalcones	94344-54-4	104115	37581	270260	45677	69387.7	65921.5	58948	201815	44120.4	63531.5	69127.8	106710	-	-
MWSslk141	C29H36O15	[M+H]+	Hesperidin methylchalcone	Flavonoids	Chalcones	24292-52-2	149460	324744	380246	282891	198878	232883	151261	193002	172390	263227	206225	128442	-	-
mws2220	C22H18O11	[M-H]-	Gallocatechin 3-O-gallate	Flavonoids	Flavanols	5127-64-0	1.66816e+07	1.32519e+07	7.39586e+06	1.34926e+07	1.94047e+07	12070578	1.50823e+07	1.62093e+07	1.78345e+07	1.3416e+07	1.32922e+07	1.34075e+07	-	-
MWSHY0203	C15H14O6	[M+H]+	Catechin	Flavonoids	Flavanols	154-23-4	2.96725e+07	1.17002e+07	1.40041e+07	1.72514e+07	3.01503e+07	2.41463e+07	2.35912e+07	2.58783e+07	1.90722e+07	2.10792e+07	2.16562e+07	2.09758e+07	C06562	ko00941,ko01110
pmb2947	C45H38O18	[M-H]-	Catechin-catechin-catechin	Flavonoids	Flavanols	-	3.63159e+07	2.0194e+07	2.74182e+07	1.67456e+07	3.18563e+07	2.71428e+07	2.13762e+07	1.88372e+07	1.63516e+07	2.67621e+07	2.74529e+07	2.62064e+07	-	-
Lmhn004960	C22H18O10	[M-H]-	7-O-Galloyltricetiflavan	Flavonoids	Flavanols	-	1.50187e+07	1.54784e+07	1.20284e+07	1.12146e+07	1.66648e+07	1.30552e+07	1.40493e+07	1.48516e+07	1.42067e+07	1.26728e+07	1.26632e+07	1.3234e+07	-	-
Zmdn002400	C21H24O11	[M-H]-	Epicatechin-3'-O-β-D-glucopyranoside*	Flavonoids	Flavanols	-	1.72373e+07	3.42285e+07	3.24894e+07	1.80265e+07	2.11826e+07	2.79625e+07	1.53447e+07	1.49871e+07	1.39405e+07	2.05809e+07	2.19571e+07	2.14483e+07	-	-
pmn001418	C24H20O9	[M-H]-	Cinchonain Id*	Flavonoids	Flavanols	85022-67-9	2.50012e+06	1.59164e+06	1.98621e+06	2.13772e+06	3.0785e+06	4.27217e+06	1.70434e+06	2.85397e+06	2.07395e+06	2.40397e+06	2.48325e+06	2.31388e+06	-	-
pmb3114	C30H26O11	[M-H]-	Epicatechin-epiafzelechin	Flavonoids	Flavanols	-	3.09806e+06	164122	179086	634458	2.19562e+06	2.28702e+06	816183	1.2748e+06	611185	1.21748e+06	1.29473e+06	1.18519e+06	-	-
Lmhn005088	C29H22O14	[M-H]-	7,3'-Di-O-gallyoltricetiflavan	Flavonoids	Flavanols	-	5.70877e+06	9.12949e+06	3.59212e+06	4.36289e+06	6.16234e+06	4.34924e+06	6.19213e+06	6.53989e+06	6.41886e+06	5.98589e+06	5.60807e+06	5.47798e+06	-	-
mws1422	C15H14O5	[M+H]+	Epiafzelechin	Flavonoids	Flavanols	24808-04-6	782145	557760	656515	551070	884410	760365	614660	586210	738580	693355	631400	661540	C12128	ko00941,ko01110
Lahp002857	C30H26O13	[M+H]+	(-)-Epicatechin-(4β->8)-(-)-epigallocatechin	Flavonoids	Flavanols	-	11790780	1.92585e+06	2.05971e+06	6667585	10260365	10426845	4.84636e+06	6.38688e+06	12639225	4.60397e+06	4.90212e+06	5.10814e+06	-	-
Lajp003377	C30H26O12	[M+H]+	Fisetinidol-(4α,6)-gallocatechin	Flavonoids	Flavanols	1262536-83-3	1.50936e+06	742096	758477	862631	1.57333e+06	1.34735e+06	912608	1.06722e+06	748571	979844	962337	1.06041e+06	-	-
mws0049	C15H14O7	[M+H]+	Gallocatechin	Flavonoids	Flavanols	970-73-0	2.98436e+07	7.85617e+06	6.45607e+06	1.39514e+07	2.42944e+07	1.80292e+07	1.81354e+07	2.61138e+07	2.12534e+07	1.77543e+07	1.9586e+07	1.94138e+07	C12127	ko00941,ko01110
Zmjn003358	C23H20O10	[M-H]-	Epicatechin-3-(3''-O-methyl)gallate	Flavonoids	Flavanols	-	323566	407938	392659	517241	472480	669173	661205	429997	495365	483020	512993	456801	-	-
Lmhn005475	C29H22O14	[M-H]-	7,4'-Di-O-galloyltricetiflavan	Flavonoids	Flavanols	-	795135	1.2911e+06	626233	574700	950865	705919	448656	863544	735290	691787	655242	736575	-	-
pmn001417	C24H20O9	[M-H]-	Cinchonain Ic*	Flavonoids	Flavanols	85081-22-7	8.36943e+06	4.77404e+06	4.24456e+06	4.95254e+06	7.89145e+06	8.03822e+06	4.1653e+06	7.02478e+06	6.20217e+06	5.50711e+06	6.08133e+06	6.17572e+06	-	-
HJN045	C45H36O17	[M-H]-	Epicatechin-(2β→O→7,4β→8)-epiafzelechin-(4α→8)-epicatechin	Flavonoids	Flavanols	-	571393	277792	391175	284782	470525	600202	366403	355006	352795	403463	423317	371358	-	-
MWSHY0098	C15H14O7	[M+H]+	Epigallocatechin	Flavonoids	Flavanols	970-74-1	8981063	6.50539e+06	5.38325e+06	6.7174e+06	1.11021e+07	7.28618e+06	9.81734e+06	1.15568e+07	1.11344e+07	7.62744e+06	8.55539e+06	8.60636e+06	C12136	ko00941,ko01110
pmn001416	C24H20O9	[M-H]-	Catechin-(7,8-bc)-4α-(3,4-dihydroxyphenyl)-dihydro-2-(3H)-one	Flavonoids	Flavanols	-	2.52956e+06	1.53605e+06	2.20895e+06	2.07061e+06	3.33842e+06	3.85141e+06	1.71843e+06	2.85459e+06	1.95188e+06	2.22337e+06	2.56207e+06	2.29644e+06	-	-
Lajp002709	C15H14O8	[M+H]+	3,3',4',5,6,7,8-Heptahydroxyflavan	Flavonoids	Flavanols	-	1.29581e+06	418052	428775	722431	1.28257e+06	914870	921627	1.07231e+06	867658	1.02658e+06	877145	939766	-	-
mws1397	C22H18O10	[M-H]-	Epicatechin gallate	Flavonoids	Flavanols	1257-08-5	1.46914e+07	1.64702e+07	1.31913e+07	1.21849e+07	1.69381e+07	1.14544e+07	1.48323e+07	1.38872e+07	1.39897e+07	1.22389e+07	1.33305e+07	1.4481e+07	-	-
pme3285	C15H14O5	[M+H]+	Afzelechin (3,5,7,4'-Tetrahydroxyflavan)	Flavonoids	Flavanols	2545-00-8	4.56041e+06	1.08782e+06	1.15774e+06	1.92762e+06	4.4618e+06	6.06205e+06	2.64916e+06	3.4057e+06	2.11092e+06	3.46386e+06	2.92666e+06	3.25897e+06	C09320	ko00941,ko01110
MWSHC2016	C22H18O11	[M-H]-	Epigallocatechin-3-O-gallate	Flavonoids	Flavanols	989-51-5	1.5819e+07	1.37157e+07	7.21716e+06	1.22756e+07	1.78908e+07	1.15234e+07	1.33145e+07	1.6105e+07	1.72068e+07	1.29754e+07	1.43774e+07	1.21632e+07	C09731	-
Lmhn004030	C15H14O6	[M-H]-	5,7,3',4',5'-Pentahydroxyflavan (Tricetiflavan)	Flavonoids	Flavanols	-	124601	145106	195570	107494	174649	139933	126346	134693	129993	140605	123463	147663	-	-
MWSHY0094	C22H18O11	[M+H]+	Gallocatechin gallate*	Flavonoids	Flavanols	4233-96-9	20286060	7.90695e+06	4673815	17006170	5.64926e+06	5.75615e+06	8.53603e+06	7.85129e+06	1.06166e+07	5.33923e+06	6.55419e+06	6.05979e+06	-	-
Zajn002491	C21H24O11	[M-H]-	catechin-4-β-D-galactopyranoside*	Flavonoids	Flavanols	-	2.06046e+07	2.39072e+07	2.95581e+07	1.30009e+07	2.21171e+07	2.17105e+07	1.51924e+07	1.31265e+07	1.07275e+07	1.93194e+07	1.49752e+07	1.59968e+07	-	-
Lmmp000897	C30H26O14	[M+H]+	Gallocatechin-(4α→8)-gallocatechin	Flavonoids	Flavanols	-	1.13678e+06	1.38949e+06	866235	1.97084e+06	1.96409e+06	1.79851e+06	1.60851e+06	1.57159e+06	1.42681e+06	1.44589e+06	1.44355e+06	1.83923e+06	-	-
Zmdn002049	C21H24O11	[M-H]-	Epicatechin-4'-O-β-D-glucopyranoside*	Flavonoids	Flavanols	-	1.58282e+07	2.85499e+07	2.98883e+07	1.73842e+07	2.08518e+07	2.36678e+07	1.48347e+07	1.41972e+07	1.2012e+07	1.93369e+07	1.47877e+07	1.9154e+07	-	-
HJN041	C21H24O11	[M-H]-	Epicatechin glucoside	Flavonoids	Flavanols	-	16384955	2.15004e+07	2.69943e+07	1.19503e+07	1.84436e+07	1.41061e+07	1.1779e+07	1.80393e+07	9.28427e+06	2.77837e+07	2.44726e+07	3.34378e+07	-	-
MWSHY0177	C22H18O10	[M+H]+	Catechin gallate	Flavonoids	Flavanols	130405-40-2	46939465	60368865	22712280	48853375	59287025	39902125	38867965	71372455	57402765	27599055	31505195	38557730	-	-
Lahp002992	C37H30O18	[M+H]+	Epigallocatechin-(4β->8)-epigallocatechin-3-O-gallate	Flavonoids	Flavanols	-	4420925	2.51831e+06	958208	12296000	3282405	1.71641e+06	7160700	6528000	4.93991e+06	2.64923e+06	3.71035e+06	3.49457e+06	-	-
Lahp003422	C22H18O11	[M+H]+	3,5,3′,4′,5′-penta-hydroxyflavan-7-gallate*	Flavonoids	Flavanols	-	9.48215e+06	5.48547e+06	3.55151e+06	6.87491e+06	1.07998e+07	6.14505e+06	9.67221e+06	1.01335e+07	1.44219e+07	6.16219e+06	8.70284e+06	7.41458e+06	-	-
Lajp002779	C45H38O19	[M+H]+	Gallocatechin-(4α->8)-Catechin-(4α->8)-Catechin	Flavonoids	Flavanols	87421-89-4	8.01252e+06	3.24036e+06	4.63442e+06	9	9	9	4.09442e+06	5.40341e+06	6.36263e+06	4.88287e+06	5.95921e+06	7.02216e+06	-	-
Lahp003174	C44H34O22	[M+H]+	Theasinensin A	Flavonoids	Flavanols	-	288719	433595	439602	335707	189780	497790	699203	1.02143e+06	1.07221e+06	371125	536806	429760	-	-
Lmmp003109	C16H16O6	[M+H]+	3'-O-Methyl-epicatechin	Flavonoids	Flavanols	76549-34-3	2.65171e+07	22139850	1.35211e+07	1.88123e+07	2.24485e+07	2.16165e+07	2.02123e+07	2.36971e+07	31324190	28755355	2.17552e+07	1.99939e+07	-	-
Lahp003275	C37H30O17	[M+H]+	Epigallocatechin-(4β->8)-epicatechin-3-O-gallateester	Flavonoids	Flavanols	126715-82-0	6.72191e+06	4.34741e+06	4.02511e+06	7.62098e+06	7.86259e+06	6.12485e+06	8.47271e+06	8.68929e+06	9.27063e+06	7.20127e+06	7.51492e+06	5.07133e+06	-	-
HJN069	C30H24O12	[M-H]-	Tetrahydroxyflavan-(4α-8-epicatechin)*	Flavonoids	Flavanols	-	2.97635e+06	1.82884e+06	1.89892e+06	1.80153e+06	3.0357e+06	3.14008e+06	1.87726e+06	2.17845e+06	1.18127e+06	1.85597e+06	1.71571e+06	2.48161e+06	-	-
Lahp002795	C37H30O18	[M+H]+	Theasinensin B	Flavonoids	Flavanols	89064-32-4	4.00295e+06	4.69868e+06	3.73374e+06	6.9334e+06	6.96663e+06	5.09652e+06	6.76477e+06	5.81844e+06	9.49187e+06	6.0219e+06	6.13636e+06	9.31856e+06	-	-
pmb2586	C30H26O13	[M-H]-	Gallocatechin-(4α→8)-catechin	Flavonoids	Flavanols	-	28474.1	31969.9	31971.6	15742	42091.4	11176.7	31255.9	35967.4	30784.8	31882.3	15302.5	27972.4	-	-
pmc1990	C17H16O5	[M-H]-	4'-Hydroxy-5,7-dimethoxyflavanone	Flavonoids	Flavanones	-	5.49114e+06	2.22932e+06	1.9724e+06	3.71696e+06	3.03888e+06	2.05417e+06	1.90572e+06	2.22138e+06	1.62587e+07	4.6278e+06	4.65198e+06	4.61976e+06	-	-
Lmdp004307	C23H26O10	[M+H]+	Farrerol-7-O-glucoside	Flavonoids	Flavanones	885044-12-2	4.16243e+06	6.8121e+06	4.06908e+06	1.06376e+07	6.43305e+06	5.86127e+06	5.22707e+06	5.14461e+06	6.29721e+06	6.05533e+06	6.08942e+06	6.04756e+06	-	-
MWSHY0176	C17H16O5	[M+H]+	Farrerol (6,8-Dimethyl-5,7,4'-trihydroxyflavanone)	Flavonoids	Flavanones	24211-30-1	1.09639e+07	4.2933e+06	4.21114e+06	7.78247e+06	6.65104e+06	4.19142e+06	3.88386e+06	4.67394e+06	4.17617e+07	1.01428e+07	9.95928e+06	1.00432e+07	C09734	-
HJN086	C21H22O11	[M-H]-	Eriodictyol-3'-O-glucoside*	Flavonoids	Flavanones	-	4.14815e+07	5.11039e+06	5.72103e+06	1.10918e+07	2.75021e+07	3.32185e+07	9.32463e+06	2.47611e+07	1.65206e+07	2.04009e+07	2.05921e+07	2.01232e+07	-	-
HJN090	C21H22O10	[M-H]-	Butin-7-O-glucoside*	Flavonoids	Flavanones	-	7.59145e+06	4.39137e+06	6.10456e+06	1.09093e+07	1.38127e+07	1.10016e+07	1.35682e+07	1.37964e+07	1.10712e+07	9.6241e+06	9.47266e+06	9.7737e+06	-	-
Lmjn005592	C18H16O7	[M-H]-	Cirsilineol (4',5-Dihydroxy-3',6,7-trimethoxyflavone)	Flavonoids	Flavanones	41365-32-6	728816	640229	873917	1.03355e+06	680873	1.14968e+06	930304	1.00998e+06	962225	882854	853625	864219	C10032	-
Smdp007779	C16H14O5	[M+H]+	8-Demethylfarrerol	Flavonoids	Flavanones	-	636994	219200	279177	366547	455784	250536	230619	216085	992165	383631	375341	370150	-	-
Lmsp011053	C18H18O6	[M+H]+	7-Hydroxy-2',5,8-Trimethoxyflavanone*	Flavonoids	Flavanones	-	632335	473008	530987	460388	552915	805717	502982	835001	696580	587619	574056	566952	-	-
MWSHY0017	C15H12O5	[M+H]+	Naringenin (5,7,4'-Trihydroxyflavanone)*	Flavonoids	Flavanones	480-41-1	1.97399e+06	367032	404047	713859	1.13604e+06	706173	697980	636392	1.07868e+06	823322	840452	858279	C00509	ko00941,ko00943,ko01100,ko01110
Zmhn001036	C21H22O10	[M-H]-	Choerospondin	Flavonoids	Flavanones	81202-36-0	1.0074e+07	6.92114e+06	3.61406e+06	7.98574e+06	1.0378e+07	8.73932e+06	8.32007e+06	8.95245e+06	8.19238e+06	8.68431e+06	8.34511e+06	8.37289e+06	-	-
mws1454	C23H26O11	[M-H]-	Persicoside	Flavonoids	Flavanones	28978-03-2	6.30726e+06	1.09557e+07	8.35853e+06	1.10849e+07	8.27972e+06	2259455	8.74523e+06	2206975	8.92566e+06	1.06767e+07	1.11999e+07	1.0756e+07	-	-
Lmjp002721	C20H22O7	[M+H]+	5,7,3',4',5'-Pentamethoxyflavanone	Flavonoids	Flavanones	-	3.02142e+07	3.87987e+07	4.67234e+07	2.45512e+07	2.70573e+07	3.04556e+07	2.99157e+07	3.37724e+07	3.07631e+07	3.03931e+07	3.11049e+07	2.94665e+07	-	-
mws0064	C15H12O6	[M-H]-	Eriodictyol (5,7,3',4'-Tetrahydroxyflavanone)	Flavonoids	Flavanones	552-58-9	388024	79456.5	70384.4	190041	331142	214456	251650	234709	229010	215943	229870	222589	C05631	ko00941,ko01100,ko01110
HJN087	C21H22O10	[M-H]-	Naringenin-4'-O-glucoside*	Flavonoids	Flavanones	-	8.30124e+06	4.84331e+06	6.77441e+06	1.20461e+07	1.38213e+07	1.02855e+07	1.51255e+07	1.49927e+07	1.24131e+07	1.06619e+07	1.0039e+07	1.01669e+07	-	-
Lmyn006922	C22H24O10	[M-H]-	Sakuranin	Flavonoids	Flavanones	529-39-5	1.36287e+06	1.16214e+06	789650	1.62759e+06	1.83024e+06	1.99375e+06	1.50692e+06	1.49954e+06	1.28305e+06	1.44706e+06	1.3495e+06	1.365e+06	C17391	-
Lmsp009013	C17H16O6	[M+H]+	4',6-Dihydroxy-5,7-dimethoxyflavanone*	Flavonoids	Flavanones	6951-57-1	1.18413e+06	1.2546e+06	1.61131e+06	970347	1.34299e+06	1513742	1.13948e+06	1.52853e+06	1.26606e+06	1.27565e+06	1.17896e+06	1.24084e+06	C14969	-
pme3475	C15H12O5	[M+H]+	Butin; 7,3',4'-Trihydroxyflavanone*	Flavonoids	Flavanones	492-14-8	898091	709738	813674	1.55208e+06	1.76103e+06	1.75298e+06	1.28901e+06	981308	830349	1.17785e+06	1.24541e+06	1.14794e+06	C09614	ko00941
pme1598	C22H24O11	[M-H]-	Hesperetin-5-O-glucoside	Flavonoids	Flavanones	69651-80-5	330105	663789	1.01784e+06	637496	748243	759115	590604	547967	362028	686368	628627	654288	-	-
MW0139629	C16H14O5	[M-H]-	Sakuranetin	Flavonoids	Flavanones	2957-21-3	715803	331873	294650	445941	521901	304677	292617	222096	1.33694e+06	498046	456678	486803	C09833	ko00941,ko01110
Lmdp007354	C17H16O6	[M+H]+	5,4'-Dihydroxy-7,8-dimethoxyflavanone*	Flavonoids	Flavanones	-	1.14189e+06	1.19547e+06	1.57845e+06	1.02292e+06	1.29978e+06	1.53255e+06	1.10176e+06	1.48917e+06	1.31953e+06	1.12368e+06	1.2131e+06	1.22621e+06	-	-
Lacn005875	C20H20O6	[M-H]-	Phellodensin D	Flavonoids	Flavanones	-	2.72806e+07	1.35219e+07	1.0908e+07	2.37539e+07	2.57328e+07	2.31155e+07	2.0344e+07	2.41528e+07	2.4295e+07	2.06264e+07	2.07802e+07	2.25188e+07	-	-
Jmgn004021	C21H22O11	[M-H]-	6-C-Glucosyl-2-Hydroxynaringenin	Flavonoids	Flavanones	-	1.48156e+07	1.24029e+07	1.22331e+07	1.1062e+07	1.53819e+07	1.48863e+07	1.30893e+07	15382842	1.09428e+07	1.39635e+07	1.2725e+07	1.29792e+07	-	-
pmb0628	C27H32O16	[M+H]+	Eriodictyol-8-C-glucoside-4'-O-glucoside	Flavonoids	Flavanones	-	833461	1.1255e+06	1.00475e+06	780445	807802	1.1141e+06	813649	653642	683732	828318	889700	915795	-	-
HJAP058	C19H20O6	[M+H]+	5,6,7,4'-Tetramethoxyflavanone	Flavonoids	Flavanones	2569-77-9	1.32481e+07	1.53085e+07	1.88633e+07	2.16602e+07	1.32646e+07	2.38109e+07	1.81569e+07	2.10434e+07	1.89504e+07	1.59564e+07	1.6109e+07	1.75378e+07	C15118	-
HJAP020	C27H32O16	[M+H]+	Eriodictyol-5,3'-Di-O-glucoside	Flavonoids	Flavanones	-	336906	504921	447808	474116	473240	509967	494189	520201	423436	471049	418094	437224	-	-
pmp000169	C19H18O7	[M+H]+	Andrographidine D aglycone	Flavonoids	Flavanones	-	1.20348e+07	9.38015e+06	1.06574e+07	1.37195e+07	1.12171e+07	1.61194e+07	1.31481e+07	1.58646e+07	1.51479e+07	1.34777e+07	1.18144e+07	1.26362e+07	-	-
Smdp009834	C18H18O5	[M+H]+	Methylfarrerol	Flavonoids	Flavanones	-	592125	546696	680054	527603	660215	658276	576627	712888	489978	658949	583367	593427	-	-
pmb3023	C21H22O11	[M-H]-	Eriodictyol-8-C-glucoside	Flavonoids	Flavanones	1023271-51-3	1.06034e+07	8.03275e+06	8.77391e+06	7.43175e+06	1.01564e+07	1.00967e+07	9.39795e+06	9.06611e+06	7.64069e+06	9.02239e+06	8.03676e+06	7.94082e+06	-	-
Lalp005356	C17H16O5	[M+H]+	(2R)-4',7-dihydroxy-5-methoxy-8-methylflavanone	Flavonoids	Flavanones	-	6.53077e+06	1.0496e+07	9.47013e+06	6.4172e+06	5.73537e+06	7.47019e+06	5.86315e+06	6.91782e+06	9.29781e+06	8.03049e+06	7.39942e+06	8.57408e+06	-	-
WaYn005089	C22H24O10	[M-H]-	Neosakuranin	Flavonoids	Flavanones	-	8.33804e+06	1.19261e+06	1.27372e+06	5.98662e+06	8.65272e+06	7.64589e+06	6.28034e+06	6.66281e+06	6.47993e+06	8.62673e+06	7.74051e+06	7.48437e+06	-	-
pme0001	C28H34O15	[M-H]-	Hesperetin-7-O-neohesperidoside(Neohesperidin)*	Flavonoids	Flavanones	13241-33-3	500732	417532	623846	419785	500833	410234	449672	407005	486387	479043	422422	418684	C09806	ko00941
Lmdn003665	C29H36O15	[M-H]-	Farrerol-5,7-di-O-glucoside	Flavonoids	Flavanones	-	7.38806e+06	1.48105e+07	1.5067e+07	1.36345e+07	6.48629e+06	1.44037e+07	8.58885e+06	5.44482e+06	7.2654e+06	9.96056e+06	1.10296e+07	1.16539e+07	-	-
mws0036	C28H34O15	[M-H]-	Hesperetin-7-O-rutinoside (Hesperidin)*	Flavonoids	Flavanones	520-26-3	1.30465e+06	1.49082e+06	2.04658e+06	1.12955e+06	2.36047e+06	1.24322e+06	970353	1620845	802771	1.29266e+06	1.35248e+06	1507792	C09755	-
pme1611	C21H22O10	[M-H]-	Isohemiphloin	Flavonoids	Flavanones	3682-02-8	1.02312e+06	1.13727e+06	1.14364e+06	718058	985925	1.17607e+06	734037	959194	799630	835942	859165	972984	-	-
mws1179	C21H22O10	[M-H]-	Naringenin-7-O-glucoside (Prunin)*	Flavonoids	Flavanones	529-55-5	1.80188e+07	4.29326e+06	5.48704e+06	7.581e+06	1.61977e+07	1.12247e+07	8.46985e+06	1.32618e+07	7.07361e+06	1.15669e+07	9.85561e+06	1.12674e+07	C09099	ko00941,ko01100
Hmqn003268	C15H12O7	[M-H]-	5,7,3',4',5'-Pentahydroxydihydroflavone	Flavonoids	Flavanones	-	1.60595e+06	1.26386e+06	1.19381e+06	926820	903152	1.57854e+06	1.18444e+06	1.09995e+06	1.13419e+06	1.36493e+06	1.1498e+06	1.1551e+06	-	-
mws0057	C21H22O11	[M+H]+	Eriodictyol-7-O-glucoside*	Flavonoids	Flavanones	38965-51-4	1.84206e+06	1.06376e+06	922715	1.1528e+06	1.78064e+06	1.88919e+06	844165	1.56974e+06	1.41961e+06	1.24928e+06	1.5231e+06	1.49229e+06	-	-
pmp000394	C26H30O13	[M+H]+	Naringenin-7-O-(2''-O-apiosyl)glucoside	Flavonoids	Flavanones	-	221074	126674	171775	328715	163220	200247	151054	291970	165337	204887	256423	213807	-	-
pmp000179	C25H28O13	[M+H]+	Andrographidine F	Flavonoids	Flavanones	113963-42-1	2.319e+06	3.72975e+06	7.64328e+06	3.92436e+06	2.87326e+06	3.62898e+06	2.66851e+06	2.67473e+06	3.2954e+06	1.88132e+06	2.24649e+06	2.44267e+06	-	-
Lmsp009245	C18H18O7	[M+H]+	3',5-Dihydroxy-4',6,7-Trimethoxyflavanone	Flavonoids	Flavanones	-	550956	373944	480246	488738	518303	506664	441496	663950	579256	442759	526841	408007	-	-
pmp000178	C25H28O12	[M+H]+	Andrographidine D	Flavonoids	Flavanones	113963-40-9	2.18401e+07	1.50994e+07	1.61732e+07	1.60112e+07	1.55882e+07	2.05254e+07	1.2565e+07	2.45743e+07	2.73469e+07	1.57e+07	1.84453e+07	1.38766e+07	-	-
Lmzp002365	C22H24O11	[M+H]+	Hesperetin-7-O-glucoside*	Flavonoids	Flavanones	31712-49-9	1.08259e+07	6.36837e+06	5.31879e+06	8.34073e+06	1.31494e+07	9.68003e+06	9.67367e+06	1.29362e+07	9.3961e+06	9.44481e+06	7.42907e+06	9.99746e+06	C16422	ko00941
Jmgn005927	C15H12O6	[M-H]-	2-hydroxynaringenin	Flavonoids	Flavanones	-	12600586	1.06203e+07	3.13091e+06	1.0782e+07	1.69862e+07	1.26654e+07	1.13746e+07	1.32669e+07	3.07102e+06	1.27201e+07	9.61905e+06	1.28111e+07	-	-
MWSprf050	C29H36O15	[M+H]+	Methylhesperidin	Flavonoids	Flavanones	11013-97-1	777120	2004005	2.0612e+06	512590	434236	588655	394521	715130	245311	746917	1084115	892795	C17393	-
pma6218	C21H22O9	[M+H]+	O-MethylNaringenin-8-C-arabinoside	Flavonoids	Flavanones	-	5705420	1.6981e+06	2696970	3899345	2.9165e+06	5326140	5421300	5324410	2.31606e+06	1.99177e+06	4106720	4868515	-	-
Wahp004841	C22H24O11	[M+H]+	Homeriodictyol-7-O-β-O-glucoside*	Flavonoids	Flavanones	-	1.07933e+07	6.53651e+06	4.77332e+06	8.75369e+06	1.45564e+07	9.91467e+06	9.95115e+06	1.2937e+07	9.93639e+06	9.4347e+06	18810470	9.43667e+06	-	-
Lmtn002796	C21H22O11	[M-H]-	Aromadendrin-7-O-glucoside	Flavonoids	Flavanonols	28189-90-4	1.34374e+07	9.20135e+06	1.08368e+07	9.3491e+06	1.30364e+07	1.31459e+07	1.29623e+07	1.23517e+07	9.20779e+06	1.11831e+07	1.12837e+07	1.14609e+07	-	-
mws0914	C15H12O5	[M-H]-	3,5,7-Trihydroxyflavanone (Pinobanksin)	Flavonoids	Flavanonols	548-82-3	2.85975e+06	634703	550816	987767	1.6218e+06	1.12486e+06	1.00276e+06	960890	1.51563e+06	1.16912e+06	1.19621e+06	1.20528e+06	C09826	ko00941
mws1094	C15H12O6	[M-H]-	Aromadendrin (Dihydrokaempferol)	Flavonoids	Flavanonols	480-20-6	485059	238048	248573	269603	533932	378358	346669	283463	560429	349427	319577	338788	C00974	ko00941,ko01100,ko01110
MWSHY0048	C15H12O8	[M+H]+	Dihydromyricetin (Ampelopsin)	Flavonoids	Flavanonols	27200-12-0	1.73365e+07	1.20088e+07	9.08038e+06	2.20197e+07	17189914	1.98624e+07	2.04594e+07	2.43837e+07	2.81697e+07	1.70783e+07	1.76604e+07	1.87718e+07	C02906	ko00941,ko01110
Lmlp005236	C21H22O11	[M+H]+	Dihydrokaempferol-3-O-glucoside*	Flavonoids	Flavanonols	31049-08-8	3.3822e+06	1.00585e+06	2.01235e+06	2.48204e+06	3.69425e+06	4.05017e+06	3.6501e+06	3.25584e+06	3.51329e+06	2.64253e+06	2.86996e+06	2.61599e+06	-	-
Cmsp004086	C16H14O6	[M+H]+	Dihydrokaempferide	Flavonoids	Flavanonols	137225-59-3	6.88235e+06	7.06835e+06	6.1636e+06	8.97958e+06	8.55464e+06	9.80132e+06	9.54119e+06	9.44988e+06	7.99546e+06	8.07939e+06	7.70084e+06	8.59527e+06	-	-
mws0044	C15H12O7	[M-H]-	Taxifolin(Dihydroquercetin)	Flavonoids	Flavanonols	480-18-2	1.26893e+07	8.19456e+06	8.1519e+06	7.33002e+06	7.05681e+06	1.11609e+07	6.57576e+06	8.28986e+06	6.79631e+06	8.37166e+06	9.60581e+06	9.15058e+06	C01617	ko00941,ko01100,ko01110
HJN104	C21H22O13	[M-H]-	Dihydromyricetin-3-O-glucoside	Flavonoids	Flavanonols	-	1.73699e+06	1.06685e+06	992365	1.75735e+06	1.82177e+06	1735356	1.82162e+06	1.48456e+06	1.40371e+06	1.72479e+06	1.65273e+06	1.49208e+06	-	-
MWStz191	C21H22O12	[M+H]+	Taxifolin-3'-O-glucoside	Flavonoids	Flavanonols	31106-05-5	282801	484140	1693345	524061	426913	669329	709539	633309	387970	309065	387801	447412	-	-
mws1000	C15H12O6	[M-H]-	Fustin	Flavonoids	Flavanonols	20725-03-5	349538	746574	838471	337120	966047	396793	364310	460540	710457	575409	440685	743798	C01378	ko00941
Wagp008065	C20H20O8	[M+H]+	3-Hydroxy-3',4',5,5',7-Pentamethoxyflavone	Flavonoids	Flavones	-	1.31583e+07	1.78738e+07	1.66299e+07	1.02793e+07	8.20666e+06	7.4454e+06	1.22113e+07	1.46187e+07	1.56762e+07	1.18745e+07	1.20437e+07	1.18981e+07	-	-
MWSHY0069	C16H12O6	[M+H]+	Hispidulin (5,7,4'-Trihydroxy-6-methoxyflavone)	Flavonoids	Flavones	1447-88-7	1.24018e+07	9.56529e+06	1.08316e+07	2.01044e+07	1.30452e+07	2.41465e+07	1.58987e+07	1.49852e+07	1.71695e+07	1.40778e+07	1.41852e+07	1.43308e+07	C10058	-
pmb3012	C22H22O11	[M-H]-	Chrysoeriol-7-O-glucoside	Flavonoids	Flavones	19993-32-9	1.1805e+07	1.7478e+07	1.89255e+07	1.4837e+07	1.14458e+07	1.88325e+07	1.44101e+07	1.66783e+07	2.13259e+07	1.57098e+07	1.54332e+07	1.56289e+07	-	-
Zmhn003257	C16H12O6	[M-H]-	5,7,2'-Trihydroxy-8-methoxyflavone	Flavonoids	Flavones	-	6.31994e+06	5.03392e+06	5.93266e+06	1.04299e+07	6.59981e+06	1.27846e+07	8.64606e+06	7823328	9.35312e+06	7.64926e+06	7.521e+06	7.53803e+06	-	-
Lajp006434	C24H26O12	[M+H]+	3',5'-dihydroxy-5,7,4'-trimethoxyflavone glucoside	Flavonoids	Flavones	-	906284	2.13653e+06	1.67708e+06	954755	1.16137e+06	1.314e+06	1.1473e+06	1.37482e+06	1.3005e+06	1.27306e+06	1.2762e+06	1.29609e+06	-	-
MWSprf106	C20H20O8	[M+H]+	Artemetin (5-Hydroxy-3,3',4',6,7-pentamethoxyflavone)*	Flavonoids	Flavones	479-90-3	1.60978e+06	2.02992e+06	1.7688e+06	2.3771e+06	1.37286e+06	2.95473e+06	1.98904e+06	2.81009e+06	2.61272e+06	2.11458e+06	2.07049e+06	2.09774e+06	-	-
Wagp010678	C20H20O8	[M+H]+	5-Hydroxy-3,3',4',5',7-Pentamethoxyflavone*	Flavonoids	Flavones	5084-19-5	5.18371e+06	5.67104e+06	6.3212e+06	7.53253e+06	6.9683e+06	9.85321e+06	6.29973e+06	7.92013e+06	7.89331e+06	6.99815e+06	6.89995e+06	6.84827e+06	-	-
Lmzp004885	C17H14O7	[M+H]+	Tricin (5,7,4'-Trihydroxy-3',5'-dimethoxyflavone)	Flavonoids	Flavones	520-32-1	6.92608e+06	5.92965e+06	9.47295e+06	9.61592e+06	7.3628e+06	1.26267e+07	9.48767e+06	9.4391e+06	9.17498e+06	8.2814e+06	8.30716e+06	8.46113e+06	C10193	-
Wagp010241	C21H22O8	[M+H]+	5,7,8,3',4',5'-Hexamethoxyflavone	Flavonoids	Flavones	-	4.98587e+06	9.2591e+06	5.79798e+06	3.37932e+06	4.02488e+06	2.7643e+06	5.23649e+06	6.63301e+06	6.30882e+06	4.98394e+06	5.05874e+06	4.94207e+06	-	-
Hmxp007521	C17H14O6	[M+H]+	3',4'-Dihydroxy-7,5'-dimethoxyflavone	Flavonoids	Flavones	-	259939	172478	248263	347534	216549	424630	271783	221069	269731	253211	256629	259919	-	-
Hagn002801	C20H18O8	[M-H]-	5,6,7,5'-tetramethoxy-3',4'-methylenedioxyflavonoid	Flavonoids	Flavones	-	1.27095e+06	429844	474413	940895	937765	1.2524e+06	1.16046e+06	1.16399e+06	1.93855e+06	1.02661e+06	999985	1.01231e+06	-	-
Lmjp005871	C18H16O7	[M+H]+	Penduletin (5,4'-Dihydroxy-3,6,7-trimethoxyflavone)	Flavonoids	Flavones	569-80-2	823401	707747	861215	1048632	635565	1.20249e+06	907700	1.11972e+06	1.1158e+06	951817	931698	925796	-	-
mws0055	C20H20O7	[M+H]+	Tangeretin (4',5,6,7,8-Pentamethoxyflavone)*	Flavonoids	Flavones	481-53-8	1.23478e+07	1.29482e+07	1.31105e+07	1.33844e+07	1.28715e+07	1.2333e+07	1.24636e+07	1.28958e+07	1.20996e+07	1.248e+07	1.27951e+07	1.243e+07	C10190	-
Wagp006815	C19H18O8	[M+H]+	Eriostemin	Flavonoids	Flavones	40522-42-7	2.90153e+07	4.03864e+07	4.69348e+07	2.50463e+07	2.59636e+07	2.88459e+07	3.07952e+07	3.26796e+07	3.19749e+07	3.04059e+07	3.00992e+07	2.94221e+07	-	-
Zmjp006451	C25H28O13	[M+H]+	Chrysosplenoside B*	Flavonoids	Flavones	-	4.8094e+06	9.74923e+06	9.60142e+06	4.31045e+06	5.31022e+06	7.87657e+06	5.50685e+06	6.93724e+06	6.94441e+06	6.55658e+06	6.69446e+06	6.78484e+06	-	-
Yyyn008289	C17H14O6	[M-H]-	pilloin	Flavonoids	Flavones	32174-62-2	4.67154e+06	2.78031e+06	2.00441e+06	7.94638e+06	4.77283e+06	9.74298e+06	5.35911e+06	5.66447e+06	5.67944e+06	5.74969e+06	5.73649e+06	5.92922e+06	-	-
Wagp010987	C20H20O8	[M+H]+	5-Hydroxy-3,7,8,3',4'-Pentamethoxyflavone*	Flavonoids	Flavones	-	5.25266e+06	6.19682e+06	5.7782e+06	7.43042e+06	6.61953e+06	1.01035e+07	6.52281e+06	7.86742e+06	7.68502e+06	6.80905e+06	6.87824e+06	6.62837e+06	-	-
Wagp008758	C20H20O9	[M+H]+	5,4'-Dihydroxy-3,6,7,3',5'-Pentamethoxyflavone	Flavonoids	Flavones	-	2.28785e+06	2.56863e+06	2.97624e+06	2.19186e+06	2.11181e+06	2.98841e+06	2.67153e+06	3.06858e+06	2.82458e+06	2.4641e+06	2.54641e+06	2.55715e+06	-	-
pmn001697	C21H18O11	[M-H]-	Apigenin-7-O-glucuronide	Flavonoids	Flavones	29741-09-1	28027.8	64504.8	89714.8	44958.3	38945.1	33336.5	57191.5	32887.6	35145.8	37933.9	36886.2	36473.7	-	-
Jmbp005971	C20H20O9	[M+H]+	Gardenin C	Flavonoids	Flavones	29550-05-8	7.28928e+06	4.57426e+06	5.39568e+06	5.04298e+06	6.79705e+06	7.38308e+06	6.33847e+06	7.4206e+06	7.24935e+06	5.82344e+06	5.86688e+06	5.633e+06	-	-
mws1313	C20H20O7	[M+H]+	Sinensetin (5,6,7,3',4'-pentamethoxyflavone)*	Flavonoids	Flavones	2306-27-6	514146	585742	488961	566343	491429	460185	592849	508316	494700	491340	512991	505254	C10186	-
Wagp007236	C19H18O7	[M+H]+	7-Hydroxy-3',4',5,6-tetramethoxyflavone*	Flavonoids	Flavones	40983-99-1	2.40949e+07	2.92899e+07	2.1379e+07	2.03737e+07	2.55836e+07	3.3067e+07	2.31042e+07	2.70999e+07	2.19729e+07	2.26514e+07	2.32721e+07	2.2273e+07	-	-
Wagp010653	C21H22O8	[M+H]+	3,5,6,7,3',4'-Hexamethoxyflavone	Flavonoids	Flavones	1251-84-9	5.28945e+06	9.4568e+06	6.03995e+06	3.59296e+06	3.84175e+06	3.05686e+06	4.81532e+06	6.43151e+06	5.58088e+06	4.63647e+06	4.8658e+06	4.78597e+06	-	-
Lajp005753	C23H24O12	[M+H]+	5,3'-dihydroxy-6,7,4'-trimethoxyflavone-8-O-β-D-glucoside	Flavonoids	Flavones	-	3.74768e+07	5.97041e+07	4.88696e+07	4.27453e+07	3.54687e+07	5.91349e+07	4.88664e+07	5.31185e+07	4.77016e+07	4.45772e+07	46848966	4.56557e+07	-	-
Wagp005934	C26H30O13	[M+H]+	Hydroxyauranetin 5-O-Glucoside	Flavonoids	Flavones	-	5.28039e+06	1.18017e+07	1.0458e+07	3.51895e+06	6.09249e+06	5.99015e+06	5.44743e+06	7.14151e+06	8.03758e+06	6.96e+06	7.27191e+06	6.95372e+06	-	-
pmb2999	C22H22O11	[M-H]-	Chrysoeriol-5-O-glucoside	Flavonoids	Flavones	-	6.12188e+06	1.07761e+07	1.31946e+07	9.19292e+06	6.13432e+06	9.62483e+06	7.16649e+06	6.50761e+06	9.13401e+06	8.80877e+06	9.20851e+06	8.80002e+06	-	-
Wagp008700	C20H20O8	[M+H]+	5-Hydroxy-3,6,7,4',5'-Pentamethoxyflavone	Flavonoids	Flavones	-	1.63723e+07	1.60963e+07	1.82601e+07	1.61502e+07	1.38248e+07	1.65135e+07	1.86894e+07	1.96504e+07	2.04749e+07	1.59861e+07	1.60202e+07	1.675e+07	-	-
pmp000113	C20H20O8	[M+H]+	5-Demethylnobiletin; 5-Hydroxy-6,7,8,3',4'-Pentamethoxyflavone*	Flavonoids	Flavones	2174-59-6	5.50134e+06	6.29722e+06	5.95921e+06	7.86603e+06	7.35193e+06	9.99345e+06	6.55881e+06	8.12421e+06	8.04996e+06	6.91592e+06	6.55834e+06	6.72011e+06	-	-
Hajp008429	C17H16O5	[M+H]+	4',5-dihydroxy-7-methoxy-6-methylfavanone	Flavonoids	Flavones	-	1.23869e+07	4.68513e+06	4.99174e+06	8.21269e+06	7.33149e+06	4.65749e+06	4.50195e+06	4.66206e+06	4.2515e+07	1.05241e+07	1.04897e+07	1.10116e+07	-	-
Zmjp008513	C20H20O9	[M+H]+	Brickellin	Flavonoids	Flavones	90357-63-4	1.10475e+06	1.23102e+06	1.62097e+06	1.1851e+06	1.06175e+06	1.52013e+06	1.31558e+06	1.48234e+06	1.36287e+06	1.17965e+06	1.2378e+06	1.23721e+06	-	-
Wagp007778	C20H20O8	[M+H]+	4'-Hydroxy-3,3',5,7,8-Pentamethoxyflavone*	Flavonoids	Flavones	-	1.17832e+07	2.2322e+07	1.89707e+07	1.22435e+07	1.16658e+07	1.58799e+07	1.29621e+07	1.31031e+07	1.50257e+07	1.4797e+07	1.40404e+07	1.42249e+07	-	-
Smhp007666	C20H20O8	[M+H]+	ageconyflavone C*	Flavonoids	Flavones	-	1.16919e+07	2.365e+07	1.94101e+07	1.22494e+07	1.07224e+07	1.5056e+07	1.29325e+07	1.19921e+07	1.45827e+07	1.43755e+07	1.42505e+07	1.36351e+07	-	-
Wagp009074	C18H16O7	[M+H]+	Santin*	Flavonoids	Flavones	27782-63-4	2.6561e+06	2.23253e+06	2.71252e+06	2.745e+06	2.74234e+06	3.92578e+06	2.82788e+06	3.27297e+06	3.56202e+06	2.93747e+06	2.78586e+06	2.91474e+06	-	-
Zmzp004111	C16H12O7	[M+H]+	Selagin	Flavonoids	Flavones	-	1.09442e+07	1.21552e+07	1.67912e+07	1.1845e+07	1.15493e+07	1.37386e+07	1.13173e+07	1.04049e+07	1.13396e+07	1.21547e+07	1.245e+07	1.17422e+07	-	-
Lmsp008392	C17H14O6	[M+H]+	4',5-Dihydroxy-3',5'-dimethoxyflavone	Flavonoids	Flavones	-	354930	225669	219052	564058	393818	818259	448471	477386	522256	439101	453291	427043	-	-
mws0043	C21H22O8	[M+H]+	Nobiletin (5,6,7,8,3',4'-Hexamethoxyflavone)	Flavonoids	Flavones	478-01-3	1.97702e+07	1.46716e+07	1.98531e+07	1.69327e+07	2.02029e+07	2.10165e+07	1.819e+07	1.62368e+07	1.49209e+07	1.69738e+07	1.8027e+07	1.75899e+07	C10112	-
Hmcn001884	C21H20O12	[M-H]-	6-Hydroxyluteolin 5-glucoside	Flavonoids	Flavones	-	244816	557446	847937	629918	661918	640968	465206	439623	416298	529093	560104	556218	-	-
Wagp009079	C21H22O8	[M+H]+	3,5,6,7,8,4'-Hexamethoxyflavone	Flavonoids	Flavones	34170-18-8	1.09637e+07	9.30609e+06	1.05405e+07	1.0729e+07	1.22958e+07	1.19228e+07	1.08844e+07	1.02887e+07	9.68453e+06	1.06378e+07	1.11039e+07	1.0456e+07	-	-
Hmgp002238	C23H24O12	[M+H]+	Jaceosidin-7-O-Glucoside	Flavonoids	Flavones	25474-11-7	3.82813e+07	5.7959e+07	5.41979e+07	4.70311e+07	3.62375e+07	6.38672e+07	5.06766e+07	4.97609e+07	5.51937e+07	4.56921e+07	4.76597e+07	4.85895e+07	-	-
Lmbn005454	C16H14O5	[M-H]-	Naringenin-5-methyl ether	Flavonoids	Flavones	61823-56-1	559964	250360	242150	314903	431062	220644	200784	176226	1.09587e+06	352623	375418	364573	-	-
pmp000110	C19H18O7	[M+H]+	7-Hydroxy-3,5,6,8-tetramethoxyflavone*	Flavonoids	Flavones	-	2.17238e+07	2.91772e+07	2.27572e+07	2.14166e+07	2.55656e+07	3.22719e+07	2.27383e+07	2.68195e+07	2.21437e+07	2.20935e+07	2.35398e+07	2.26807e+07	-	-
Zmjp006442	C19H18O8	[M+H]+	Chrysosplenol G	Flavonoids	Flavones	-	3.1992e+06	4.21676e+06	4.90202e+06	2.52209e+06	3.06745e+06	3.94843e+06	2.91963e+06	3.49999e+06	2.9425e+06	3.14718e+06	3.15343e+06	3.3295e+06	-	-
Zmjp006385	C26H30O14	[M+H]+	Chrysosplenoside H	Flavonoids	Flavones	-	1.24021e+06	1.90892e+06	1.90184e+06	1.06733e+06	1.21782e+06	1.88003e+06	1.353e+06	1.4428e+06	1.69966e+06	1.54293e+06	1.60306e+06	1.64596e+06	-	-
Zasp005105	C21H20O12	[M+H]+	Annulatin 3'-O-β-D-xyloside	Flavonoids	Flavones	-	4.69035e+06	4.90379e+06	4.26536e+06	4.85654e+06	4.84431e+06	5.90753e+06	5.53222e+06	7.44512e+06	5.2731e+06	5.18939e+06	5.38847e+06	5.05157e+06	-	-
Wmkp002590	C27H30O15	[M+H]+	5,7-Dihydroxy-4-methoxyflavone-3-O-xylose-(1-6)-glucose	Flavonoids	Flavones	-	4.20226e+07	1.18502e+07	1.54745e+07	9.90188e+06	2.1223e+07	4.00209e+07	2.63974e+07	3.90363e+07	2.97004e+07	2.56583e+07	2.73471e+07	26166740	-	-
pmp000107	C18H16O6	[M+H]+	Monohydroxy-trimethoxyflavone	Flavonoids	Flavones	-	221133	465830	372553	242140	346479	399788	220204	356035	240026	316913	335865	335440	-	-
Zajp007311	C20H20O7	[M+H]+	3',4',5',5,7-Pentamethoxyflavone*	Flavonoids	Flavones	53350-26-8	9.22786e+06	9.36753e+06	9.22394e+06	9.46232e+06	9.11853e+06	8.82617e+06	9.31222e+06	9.08999e+06	8.59581e+06	8.88458e+06	9.2537e+06	8.66421e+06	-	-
Hmxp008844	C21H22O9	[M+H]+	Gardenin A	Flavonoids	Flavones	21187-73-5	7.16402e+06	5.73156e+06	7.40297e+06	7.90014e+06	8.21557e+06	9.94196e+06	9.23224e+06	1.00477e+07	9.69304e+06	7.68863e+06	7.90269e+06	8.21712e+06	-	-
Lajp006633	C25H28O13	[M+H]+	5,8-dihydroxy-6,7,3',4'-tetramethoxyflavone-8-O-β-D-glucoside*	Flavonoids	Flavones	-	5.27762e+06	9.10065e+06	9.1956e+06	4.84532e+06	5.43768e+06	7.94336e+06	5.52492e+06	6.88935e+06	7.29164e+06	6.78163e+06	6.37388e+06	6.7439e+06	-	-
Wayn005694	C28H24O15	[M-H]-	Tricetin 5-(2''-dihydroxybenzoylglucoside)	Flavonoids	Flavones	-	6.04974e+06	9.9079e+06	5.5495e+06	9.84016e+06	4.8536e+06	8.8612e+06	8.6213e+06	8.33978e+06	7.28855e+06	7.96837e+06	8.46396e+06	7.98852e+06	-	-
MW0133680	C15H12O3	[M+CH3COO]-	4'-Hydroxyflavanone	Flavonoids	Flavones	-	3.53916e+06	3.98086e+06	3.21362e+06	3.66556e+06	3.38602e+06	3.7349e+06	3.55356e+06	3.71555e+06	3.34361e+06	3.45567e+06	3.44705e+06	3.66198e+06	C19896	-
pmp000009	C18H16O8	[M+H]+	Centaureidin (5,7,3'-Trihydroxy-3,6,4'-Trimethoxyflavone)	Flavonoids	Flavones	17313-52-9	1.87315e+07	2.1347e+07	3.16504e+07	1.91226e+07	1.79211e+07	2.20221e+07	2.33742e+07	2.65648e+07	2.2974e+07	2.17883e+07	2.31515e+07	2.3165e+07	-	-
pmp000004	C17H14O7	[M+H]+	4',5,7-Trihydroxy-3',6-dimethoxyflavone (Jaceosidin)	Flavonoids	Flavones	18085-97-7	2.3934e+07	2.78473e+07	3.43037e+07	4.70719e+07	3.95931e+07	3.25866e+07	4.44973e+07	2.93251e+07	3.03137e+07	3.88181e+07	4.12797e+07	41266005	-	-
Lmdp007826	C18H16O7	[M+H]+	5,6-Dihydroxy-7,3',4'-Trimethoxyflavone	Flavonoids	Flavones	-	1.58795e+06	1.65675e+06	2.01914e+06	2.54172e+06	1.49206e+06	2.68906e+06	2.27833e+06	2.41403e+06	2.30258e+06	1.83068e+06	1.93329e+06	1.95749e+06	-	-
Lmsp010424	C20H20O7	[M+H]+	3,4',5,6,7-Pentamethoxyflavone	Flavonoids	Flavones	4472-73-5	839825	750526	1.11564e+06	1.03915e+06	1.0829e+06	1.53682e+06	1.17223e+06	1.27722e+06	1.1945e+06	1.17858e+06	1.10378e+06	1.16963e+06	-	-
Zmsp007375	C20H20O7	[M+H]+	3,5,7,3'4'-Pentamethoxyflavone	Flavonoids	Flavones	1247-97-8	656216	913321	645589	422855	656757	445935	509561	585565	551615	568921	553998	530110	-	-
pmp000010	C17H14O8	[M+H]+	5,7,4',5'-Tetrahydro-3',6-dimethoxyflavone	Flavonoids	Flavones	-	1.6422e+06	1.70107e+06	2.13729e+06	2.44505e+06	1.55014e+06	2.6837e+06	2.08714e+06	2.34276e+06	2.29743e+06	2.02371e+06	1.88478e+06	1.96125e+06	-	-
Wagp006173	C27H32O14	[M+H]+	4'-Hydroxy-5,6,7,8,3',5'-Hexamethoxyflavone O-Glucoside	Flavonoids	Flavones	-	8.49073e+06	1.24158e+07	1.15131e+07	6.67762e+06	7.6507e+06	1.12282e+07	1.12339e+07	1.24877e+07	1.36096e+07	9.62989e+06	1.03373e+07	9.87373e+06	-	-
Lajp005193	C26H30O14	[M+H]+	Gardenin C glucoside	Flavonoids	Flavones	-	2.60666e+07	1.95736e+07	2.147e+07	2.60015e+07	25281749	5.05787e+07	3.99668e+07	4.4051e+07	5.19027e+07	2.85424e+07	2.90725e+07	3.0659e+07	-	-
Lmtn002916	C22H20O14	[M-H]-	Mearnsetin-3-O-glucuronide	Flavonoids	Flavones	-	3.22959e+06	2.16061e+06	2.91505e+06	2.19228e+06	2.5261e+06	2.17701e+06	2.60558e+06	2.43302e+06	2.27349e+06	2.41038e+06	2.24101e+06	2.3645e+06	-	-
pmp000115	C21H22O9	[M+H]+	Monohydroxy-hexamethoxyflavone	Flavonoids	Flavones	-	7.3059e+06	8.71966e+06	1.01646e+07	8.31946e+06	7.38112e+06	1.07956e+07	8.12534e+06	9.19336e+06	8.87451e+06	8.08739e+06	8.12795e+06	8.65109e+06	-	-
Lmxn007456	C18H16O8	[M-H]-	Acerosin	Flavonoids	Flavones	15835-74-2	1.00884e+06	1.21475e+06	1.83928e+06	1.09881e+06	1.07321e+06	1.22169e+06	1.39704e+06	1.50312e+06	1.39255e+06	1.21286e+06	1.28248e+06	1.192e+06	C09982	-
Lmdp007998	C18H16O7	[M+H]+	Xanthomicrol (5,4'-Dihydroxy-6,7,8-trimethoxyflavone)*	Flavonoids	Flavones	16545-23-6	2.69268e+06	2.42987e+06	2.84701e+06	2.86274e+06	2.68e+06	4.13945e+06	3.10004e+06	3.05963e+06	3.1633e+06	3.17103e+06	2.93536e+06	3.06587e+06	C14476	-
Wagp006511	C19H18O7	[M+H]+	7-Demethyltangeretin	Flavonoids	Flavones	73213-66-8	2.08837e+06	5.67797e+06	6.3375e+06	4.06353e+06	4.43629e+06	5.25292e+06	2.9334e+06	2.55487e+06	1.63656e+06	3.42773e+06	3.61422e+06	3.712e+06	-	-
Lmjp007790	C18H16O6	[M+H]+	5-Hydroxy-3,7,4'-trimethoxyflavone	Flavonoids	Flavones	-	5.98569e+06	4.68301e+06	4.18822e+06	1.12839e+07	6.51707e+06	1.37287e+07	7.64874e+06	9.59932e+06	7.56904e+06	7.3451e+06	7.88084e+06	7.89356e+06	-	-
Zmhp004065	C18H16O7	[M+H]+	7,8-Dihydroxy-5,6,4'-trimethoxyflavone*	Flavonoids	Flavones	-	585565	598439	556705	805690	425151	826165	765939	819366	951984	710243	657876	668979	-	-
Jmbp005389	C18H16O8	[M+H]+	Thymonin (5,6,4'-Trihydroxy-7,8,3'-trimethoxyflavone)	Flavonoids	Flavones	76844-67-2	1.3353e+06	1.57164e+06	2.06761e+06	1.29301e+06	1.37636e+06	1.40585e+06	1.79805e+06	1.98858e+06	1.63145e+06	1.5937e+06	1.46873e+06	1.52813e+06	C10191	-
Zmap009745	C18H16O7	[M+H]+	Ayanin (3',5-Dihydroxy-3,4',7-Trimethoxyflavone)*	Flavonoids	Flavones	572-32-7	699217	482563	523486	714432	812971	1.10612e+06	756278	740208	959126	774458	714844	756493	C04444	ko00944,ko01110
Hmhp007382	C19H18O7	[M+H]+	5-Hydroxy-7,8,2',6'-Tetramethoxyflavone (Altisin)*	Flavonoids	Flavones	-	4.09588e+06	3.47963e+06	3.7056e+06	4.57839e+06	3.75995e+06	5.83735e+06	4.66062e+06	5.46207e+06	4.91076e+06	4.4982e+06	4.19696e+06	4.52121e+06	-	-
pmp000786	C18H16O7	[M+H]+	Eupatorin; 3',5-Dihydroxy-4',6,7-Trimethoxyflavone*	Flavonoids	Flavones	855-96-9	6.80514e+06	6.96161e+06	1.00841e+07	1.11365e+07	6.69877e+06	1.08335e+07	8.67768e+06	9.98408e+06	9.80138e+06	8.18789e+06	8.7588e+06	8.1219e+06	-	-
Zmhp003514	C16H12O6	[M+H]+	6,7,8-Tetrahydroxy-5-methoxyflavone*	Flavonoids	Flavones	-	1.11976e+07	8.60079e+06	1.01472e+07	1.83927e+07	1.1993e+07	2.26247e+07	1.44438e+07	1.33932e+07	1.61252e+07	1.43428e+07	1.52879e+07	1.55584e+07	-	-
Wagp005813	C25H28O12	[M+H]+	5-Hydroxy-7,8,2',3'-Tetramethoxyflavone 5-Glucoside*	Flavonoids	Flavones	-	2.87971e+06	5.7793e+06	4.4835e+06	2.06589e+06	3.8412e+06	3.09731e+06	2.75393e+06	3.36132e+06	3.7457e+06	3.34808e+06	3.55375e+06	3.64076e+06	-	-
Zbsp005869	C18H16O7	[M+H]+	7,4'-Dihydroxy-3,5,3'-trimethoxyflavone*	Flavonoids	Flavones	-	2.77746e+06	2.40835e+06	2.92575e+06	2.95437e+06	2.71346e+06	4.00998e+06	3.11883e+06	3.15413e+06	3.51969e+06	2.99026e+06	2.77206e+06	2.77962e+06	-	-
Lazp003122	C27H30O15	[M+H]+	Chrysoeriol xylosyl glucoside	Flavonoids	Flavones	-	198293	183455	91874.1	117474	310988	170657	238974	199608	233112	137868	139832	149649	-	-
Hajp007261	C20H20O8	[M+H]+	4'-hydroxy-5,7,3',5'-pentamethoxyfavone*	Flavonoids	Flavones	-	1.99132e+07	2.42356e+07	1.64299e+07	1.69962e+07	1.80324e+07	2.40362e+07	1.92085e+07	2.2533e+07	1.98949e+07	1.92826e+07	1.89315e+07	1.77007e+07	-	-
Lagp007132	C18H16O7	[M+H]+	7,3',4'-Trihydroxyquercetin*	Flavonoids	Flavones	-	773574	462811	565598	694208	771393	944727	756358	817226	962473	695462	747252	756602	-	-
Lmtn002997	C22H22O13	[M-H]-	Mearnsetin-3-O-glucoside	Flavonoids	Flavones	-	1.04214e+07	1.32704e+07	1.01863e+07	1.26648e+07	1.32668e+07	1.13614e+07	1.39337e+07	1.42991e+07	1.44175e+07	1.27518e+07	1.19014e+07	1.29741e+07	-	-
Wagp007122	C19H18O8	[M+H]+	5,4'-Dihydroxy-6,7,8,3'-tetramethoxyflavone*	Flavonoids	Flavones	16520-78-8	3.02278e+07	3.74393e+07	4.32492e+07	2.38828e+07	2.54079e+07	2.77925e+07	3.13152e+07	3.35902e+07	3.05973e+07	2.79531e+07	3.05444e+07	2.88371e+07	-	-
Wagp009413	C19H18O8	[M+H]+	5,7-Dihydroxy-3,4',6,8-tetramethoxyflavone*	Flavonoids	Flavones	50461-86-4	1.14526e+07	1.04952e+07	1.24795e+07	1.27951e+07	9.17505e+06	1.34371e+07	1.09546e+07	1.17541e+07	1.10205e+07	1.17737e+07	1.10578e+07	1.21256e+07	-	-
Wagp009729	C20H20O9	[M+H]+	5,7-Dihydroxy-3,6,8,3',4'-Pentamethoxyflavone*	Flavonoids	Flavones	-	1.27205e+06	1.49619e+06	1.5962e+06	1.46215e+06	1.11294e+06	1.76483e+06	1.44217e+06	1.75491e+06	1.58634e+06	1.35463e+06	1.41723e+06	1.48721e+06	-	-
Zmjp006684	C19H18O8	[M+H]+	Chrysosplenol E*	Flavonoids	Flavones	-	2.82139e+07	3.8231e+07	4.5023e+07	2.47028e+07	2.72959e+07	3.13795e+07	2.95086e+07	3.47676e+07	2.96575e+07	2.9069e+07	3.19389e+07	3.02407e+07	-	-
Zmjp010694	C19H18O7	[M+H]+	5-Hydroxy-3,7,3',4'-tetramethoxyflavone (Retusin)*	Flavonoids	Flavones	1245-15-4	4.08945e+06	3.30234e+06	3.67829e+06	4.61498e+06	4.06288e+06	6.2286e+06	4.72369e+06	5.55732e+06	5.65824e+06	4.82684e+06	4.42225e+06	4.78332e+06	-	-
Lajp005361	C26H30O13	[M+H]+	5-hydroxy-6,7,8,3',4'-pentamethoxyflavone glucoside*	Flavonoids	Flavones	-	4.70423e+06	7.4607e+06	1.01924e+07	3.2662e+06	3.44692e+06	6.45042e+06	4.21349e+06	3.1561e+06	5.20499e+06	4.75444e+06	4.87225e+06	5.20996e+06	-	-
Hmlp005105	C16H12O5	[M+H]+	3,7-dihydroxy-4'-methoxyflavone	Flavonoids	Flavones	-	60020	127635	148377	101710	221464	152019	180995	63346.4	53249.5	167255	157051	152334	-	-
pmp000003	C16H12O7	[M+H]+	Nepetin (5,7,3',4'-Tetrahydroxy-6-methoxyflavone)	Flavonoids	Flavones	520-11-6	3.65651e+06	6.04185e+06	707698	8.14376e+06	1.11609e+07	1.13904e+07	1.02806e+07	5.73535e+06	9.01206e+06	6.30064e+06	6.83547e+06	6.87978e+06	-	-
MWSHC2053	C20H20O7	[M+H]+	5-Demethoxynobiletin; 3',4',6,7,8-Pentamethoxyflavone*	Flavonoids	Flavones	42206-91-7	410597	442724	401112	431887	414667	424213	388619	421293	367116	419519	433805	394003	-	-
Layp009023	C20H20O8	[M+H]+	6-Hydroxy-3',4',5,4',7-pentamethoxyflavone*	Flavonoids	Flavones	-	1.59166e+06	1.99497e+06	1.7443e+06	2.71751e+06	1.41279e+06	3.14234e+06	1.9364e+06	2.61375e+06	2.44334e+06	1.99371e+06	1.94169e+06	2.13204e+06	-	-
mws0920	C15H10O7	[M-H]-	Tricetin (5,7,3',4',5'-Pentahydroxyflavone)	Flavonoids	Flavones	520-31-0	1.36997e+06	1.87009e+06	877119	1.94855e+06	1.01177e+06	1.83384e+06	2.03443e+06	1.79395e+06	1.23513e+06	1.54513e+06	1.45702e+06	1.6089e+06	C10192	ko00941
Wagp004984	C24H26O14	[M+H]+	Limocitrol 3-Glucoside	Flavonoids	Flavones	-	2.42584e+06	3.22852e+06	5487080	2.35748e+06	2.44336e+06	4.09527e+06	2.71586e+06	3.21653e+06	3.34683e+06	2.55538e+06	2.64513e+06	2.82052e+06	-	-
pmp000013	C24H26O12	[M+H]+	Eupatilin-7-O-glucoside	Flavonoids	Flavones	-	971106	1.98837e+06	1.58441e+06	1.12071e+06	1.16968e+06	1.34202e+06	1.0783e+06	1.36114e+06	1.17315e+06	1.28805e+06	1.18514e+06	1.17674e+06	-	-
Lmqn006260	C15H10O7	[M-H]-	2',3',4',5,7-Pentahydroxyflavone	Flavonoids	Flavones	-	1.74153e+06	1.61781e+06	903492	2.21989e+06	2.46391e+06	3.20231e+06	2.35504e+06	2.19735e+06	2.08229e+06	1.97364e+06	2.13145e+06	2.18547e+06	-	-
Hagn002504	C19H16O7	[M-H]-	5,7,5'-Trimethoxy-3',4'-methylenedioxyflavonoid	Flavonoids	Flavones	-	7.67341e+07	1.95023e+07	2.51271e+07	3.47391e+07	4.64632e+07	2.58671e+07	4.05358e+07	5.00557e+07	5.47882e+07	4.06346e+07	4.03142e+07	4.43462e+07	-	-
pme0088	C15H10O6	[M-H]-	Luteolin (5,7,3',4'-Tetrahydroxyflavone)	Flavonoids	Flavones	491-70-3	78227.3	34041.8	28128.3	53193.9	68016.7	65351.3	66173.3	52296.7	60131.7	57489.1	53167.6	59172.8	C01514	ko00941,ko00944,ko01100,ko01110
Wayn004373	C28H24O16	[M-H]-	Tricetin 5-(4''-galloylrhamnoside)	Flavonoids	Flavones	-	2.1537e+06	7.82515e+06	5.84833e+06	3.14984e+06	2.05026e+06	3.57736e+06	2.88089e+06	3.14816e+06	2.31193e+06	3.29758e+06	3.63764e+06	3.31993e+06	-	-
pmp001076	C20H20O7	[M+H]+	Isosinensetin	Flavonoids	Flavones	17290-70-9	1.07032e+06	1.02467e+06	1.03638e+06	986483	1.07714e+06	932028	1.00141e+06	966240	1.03154e+06	943715	996456	889180	-	-
Lajp006279	C25H28O13	[M+H]+	5,3'-dihydroxy-6,7,4',5'-tetramethoxyflavone glucoside	Flavonoids	Flavones	-	5.10899e+06	9.73343e+06	9.56852e+06	4.79271e+06	5.17879e+06	8.33225e+06	4.83376e+06	6.62589e+06	6.76039e+06	7.43261e+06	6.63398e+06	6.98371e+06	-	-
MW0132545	C15H10O5	[M-H]-	3,7,4'-Trihydroxyflavone	Flavonoids	Flavones	2034-65-3	129315	91360.6	129622	116586	113816	111082	131164	97591.8	105170	128416	117968	132375	C10037	-
Wagp007572	C19H18O7	[M+H]+	Quercetin 3,5,7,3'-tetramethyl ether	Flavonoids	Flavones	-	2.45853e+07	4.21702e+07	3.65654e+07	2.08333e+07	2.71484e+07	3.44902e+07	2.42195e+07	2.48835e+07	3.30683e+07	3.00312e+07	2.6872e+07	2.95454e+07	-	-
MWSslk055	C18H16O7	[M+H]+	Nevadensin*	Flavonoids	Flavones	10176-66-6	2.6518e+06	2.41968e+06	3.2399e+06	2.8979e+06	2.88256e+06	4.06844e+06	2.95768e+06	3.2135e+06	3.5501e+06	3.23335e+06	2.87958e+06	3.00432e+06	C10111	-
Lmjp007279	C19H18O7	[M+H]+	Penduletin 4'-Methyl Ether (5-Hydroxy-3,6,7,4'-Tetramethoxyflavone)	Flavonoids	Flavones	14787-34-9	711512	668799	698126	1.19034e+06	723702	1.42001e+06	991336	1.31288e+06	1.1011e+06	999344	909304	1.01746e+06	-	-
Hmmp007513	C19H18O8	[M+H]+	5,7-Dihydroxy-6,3',4',5'-tetramethoxyflavone (Arteanoflavone)*	Flavonoids	Flavones	68710-17-8	1.1176e+07	1.07352e+07	1.30215e+07	1.20217e+07	9.56542e+06	1.27203e+07	1.18557e+07	1.24736e+07	1.24507e+07	1.24168e+07	1.12496e+07	1.11805e+07	-	-
Hmpp003270	C21H20O11	[M+H]+	Luteolin-4'-O-glucoside	Flavonoids	Flavones	6920-38-3	15732920	7278100	1.33341e+07	6.49743e+06	19030415	1.11766e+07	7.83505e+06	10877095	8538680	9434350	10656280	1.01228e+07	-	-
Zmjp006741	C25H28O13	[M+H]+	Chrysosplenoside E*	Flavonoids	Flavones	-	5.51555e+06	9.35868e+06	8.90405e+06	4.74986e+06	5.36645e+06	8.64653e+06	5.5173e+06	6.59856e+06	7.14585e+06	7.44539e+06	6.60823e+06	6.82699e+06	-	-
mws1434	C21H20O10	[M-H]-	Apigenin-6-C-glucoside (Isovitexin)*	Flavonoids	Flavones	38953-85-4	110045	33852.3	39314.8	118390	46965.2	56811	68581.8	43526.5	59850.8	56362.9	60367.6	53230	C01714	ko00944
Lmdp006479	C17H14O7	[M+H]+	5,6,4'-Trihydroxy-7,3'-dimethoxyflavone	Flavonoids	Flavones	-	1.33048e+06	1.81475e+06	2.44553e+06	1.98904e+06	1250214	1.74146e+06	1.82139e+06	1.87419e+06	1.60698e+06	1.53883e+06	1.70882e+06	1.5277e+06	-	-
Lajp005820	C27H32O14	[M+H]+	Gardenin A glucoside	Flavonoids	Flavones	-	8.14536e+06	1.215e+07	1.04003e+07	6.75079e+06	7.61076e+06	1.01736e+07	1.09552e+07	1.25873e+07	1.44287e+07	9.203e+06	1.0322e+07	1.03189e+07	-	-
Lmtp005305	C22H22O12	[M+H]+	Mearnsetin-3-O-rhamnoside (Mearnsitrin)	Flavonoids	Flavones	30484-88-9	1.17563e+06	1.64445e+06	1.11588e+06	1.69969e+06	1.56991e+06	1.68844e+06	1.56209e+06	1.79334e+06	1.82929e+06	1.4833e+06	1.67134e+06	1.4993e+06	-	-
MW0133087	C17H14O5	[M-H]-	3-Hydroxy-3',4'-dimethoxyflavone	Flavonoids	Flavones	6889-80-1	50673.6	58397	55964.6	68172.4	56829.1	70634.1	59111.1	71221.5	75553.2	60503.5	61511.5	68378.2	-	-
Zmjp009119	C19H18O8	[M+H]+	Chrysosplenetin (5,4'-Dihydroxy-3,6,7,3'-tetramethoxyflavone)*	Flavonoids	Flavones	603-56-5	1.0655e+07	1.13348e+07	1.2295e+07	1.1981e+07	9.32916e+06	1.35788e+07	1.13496e+07	1.22761e+07	1.17209e+07	1.22445e+07	1.07027e+07	1.17009e+07	C10030	-
pmb0738	C34H34O16	[M+H]+	Tricin-7-O-(2''-Sinapoyl)glucoside	Flavonoids	Flavones	-	3.52995e+06	4.23701e+07	2.41983e+07	3.75986e+06	3.784e+06	4.16213e+06	2.69789e+06	3.11938e+06	2.18249e+06	8.86515e+06	1.01725e+07	9.79803e+06	-	-
pmp000161	C17H14O6	[M+H]+	5,2'-Dihydroxy-7,8-dimethoxyflavone	Flavonoids	Flavones	41060-16-6	93651.5	78581.7	86288.1	154101	90294.5	182072	139067	117936	125941	117761	130138	113895	-	-
Wayn004603	C21H18O13	[M-H]-	Tricetin 3'-glucuronide*	Flavonoids	Flavones	-	360014	904802	922163	666151	558383	758354	690198	548359	493068	633309	729744	687546	-	-
MWSHY0104	C21H20O11	[M+H]+	Luteolin-7-O-glucoside (Cynaroside)	Flavonoids	Flavones	5373-11-5	3.21776e+07	1.31644e+07	4759930	2.29215e+07	3.99581e+07	3.23954e+07	3.04774e+07	2.30418e+07	2.36236e+07	2.61455e+07	28053295	3.01772e+07	C03951	ko00944
mws1073	C27H30O15	[M+H]+	Apigenin-6,8-di-C-glucoside (Vicenin-2)	Flavonoids	Flavones	23666-13-9	175245	168270	152639	278007	219851	252552	410595	255994	214499	199902	202904	228024	C10195	-
Lagp004342	C24H26O13	[M+H]+	5,2',5'-Trihydroxy-3,7,4'-trimethoxyflavone-2'-O-β-D-glucoside	Flavonoids	Flavones	-	1.40085e+07	1.37537e+07	1.3941e+07	1.35835e+07	1.53432e+07	2.56453e+07	1.6648e+07	2.18051e+07	1.84421e+07	1.54375e+07	1.52385e+07	1.73942e+07	-	-
Hmgp002148	C22H22O12	[M+H]+	Nepetin-7-O-alloside	Flavonoids	Flavones	-	1390090	1.29863e+06	1698405	2906025	1.60129e+06	1.50361e+06	1.63356e+06	1.49331e+06	1467191	1.47642e+06	1.59558e+06	1.3744e+06	-	-
Lmfn001893	C15H14O7	[M-H]-	Leucocyanidin	Flavonoids	Flavones	27015-21-0	1.6564e+06	661082	768293	1.11845e+06	1.86581e+06	1.63868e+06	1.25816e+06	1.53147e+06	1.45482e+06	1.48945e+06	1.28985e+06	1.34518e+06	-	-
Lajp005213	C25H28O12	[M+H]+	5-hydroxy-7,8,3',4'-tetramethoxyflavone glucoside*	Flavonoids	Flavones	-	2.89424e+06	5.42642e+06	4.42105e+06	2.12703e+06	3.37636e+06	2.92305e+06	2.25002e+06	3.46886e+06	3.47777e+06	2.89464e+06	3.36815e+06	3.1609e+06	-	-
Wagp005210	C25H28O12	[M+H]+	Gardenin B 5-glucoside*	Flavonoids	Flavones	-	2.89424e+06	5.42642e+06	4.42105e+06	2.12703e+06	3.37636e+06	2.92305e+06	2.25002e+06	3.46886e+06	3.47777e+06	2.89464e+06	3.36815e+06	3.1609e+06	-	-
Layp005773	C25H28O12	[M+H]+	5,6,7,3',-Tetramethyl-4'-hydroxyflavone glucoside*	Flavonoids	Flavones	-	2.62634e+06	5.41802e+06	4.02671e+06	1.63813e+06	3.67048e+06	2.78078e+06	2.5014e+06	3.28079e+06	3.25229e+06	2.72777e+06	3.07572e+06	3.17201e+06	-	-
Lajp006112	C27H28O16	[M+H]+	5,8,3'-trihydroxy-6,7,4'-trimethoxyflavone-8-O-malonylglucoside*	Flavonoids	Flavones	-	790813	1.63436e+06	1.97182e+06	846060	1.0834e+06	1.21908e+06	899021	1.25536e+06	1.10538e+06	950258	1.1111e+06	1.04679e+06	-	-
Hajp008550	C21H22O8	[M+H]+	5,6,7,3',4',5'-hexamethoxyflavone	Flavonoids	Flavones	29043-07-0	565093	493354	567036	536296	625088	543211	576464	471104	466053	539403	588905	503914	-	-
Jmbp005434	C19H18O9	[M+H]+	Gardenin E	Flavonoids	Flavones	29550-07-0	4.04029e+06	5.10768e+06	6.84454e+06	4.59683e+06	3.93176e+06	5.79935e+06	5.72065e+06	6.56142e+06	5.93765e+06	5.46027e+06	4.73997e+06	5.52043e+06	-	-
Zmhp004269	C19H18O8	[M+H]+	Skullcapflavone II	Flavonoids	Flavones	55084-08-7	5.37175e+06	5.44079e+06	5.93188e+06	5.412e+06	4.63606e+06	6.99882e+06	5.55647e+06	5.6751e+06	5.73061e+06	6.29115e+06	5.37176e+06	5.60325e+06	C10183	-
Zmjp005842	C18H16O8	[M+H]+	Chrysosplenol C	Flavonoids	Flavones	23370-16-3	7.56121e+06	1.13491e+07	1.32766e+07	7.96682e+06	8.85328e+06	1.28988e+07	9.53256e+06	1.18581e+07	1.19893e+07	8.63593e+06	9.47593e+06	1.02176e+07	-	-
pmb0716	C29H34O17	[M+H]+	Tricin-4'-O-glucoside-7-O-glucoside	Flavonoids	Flavones	-	201210	1388405	755335	492520	197187	621355	374062	726855	549395	679960	571150	618010	-	-
pmn001702	C21H18O12	[M-H]-	Tetahydroxyflavone-7-O-glucuronide*	Flavonoids	Flavones	-	2.86177e+06	4.31864e+06	4.59121e+06	4.35602e+06	2.87079e+06	3.01082e+06	2.86715e+06	2.50777e+06	3.6863e+06	3.55279e+06	3.70487e+06	3.11799e+06	-	-
MWSslk060	C18H16O7	[M+H]+	Eupatilin (5,7-Dihydroxy-3',4',6-Trimethoxyflavone)*	Flavonoids	Flavones	22368-21-4	533070	480830	659768	796738	477436	882010	769300	844345	847849	670213	616613	735692	C10040	-
Lmlp005572	C21H20O10	[M+H]+	Galangin-7-O-glucoside	Flavonoids	Flavones	-	6392030	3383055	3815450	3842840	7583445	5218940	4286920	6165700	3750420	4353905	5004785	5163645	-	-
Wagp009874	C20H20O9	[M+H]+	3',4'-Dihydroxy-5,6,7,8,5'-Pentamethoxyflavone*	Flavonoids	Flavones	-	1.28409e+06	1.47525e+06	1.6854e+06	1.419e+06	1.10337e+06	1.6818e+06	1.25929e+06	1.70733e+06	1.55061e+06	1.49099e+06	1.27972e+06	1.51326e+06	-	-
Wagp009533	C20H20O8	[M+H]+	5-Hydroxy-6,7,3',4',5'-Pentamethoxyflavone	Flavonoids	Flavones	29215-55-2	110856	149630	103934	179758	222380	167007	209482	173118	210300	136862	113857	131089	-	-
Wagp008324	C21H22O8	[M+H]+	5,6,2',3',4',6'-Hexamethoxyflavone	Flavonoids	Flavones	-	82771.3	120409	95230.8	56039	70462.5	62351.3	70964.5	79612.4	83581.6	79612.4	65661.8	73851.6	-	-
pmp000789	C19H18O8	[M+H]+	Casticin (5,3'-Dihydroxy-3,6,7,4'-Tetramethoxyflavone)	Flavonoids	Flavones	479-91-4	984529	804555	945641	1.53429e+06	889506	1.93713e+06	1.30707e+06	1.75102e+06	1.61994e+06	1.22719e+06	1.07042e+06	1.30108e+06	-	-
Lagp003663	C24H26O12	[M+H]+	7,3',4'-Trihydroxyquercetin glucoside	Flavonoids	Flavones	-	38915415	2.79547e+07	45663225	45213865	44196210	57894250	44926930	48043080	55814865	47751085	39224185	46592865	-	-
pmp000008	C19H18O7	[M+H]+	5-Hydroxy-6,7,3',4'-tetramethoxyflavone	Flavonoids	Flavones	21763-80-4	338633	338402	413006	419405	393940	487853	391438	463251	442889	334944	362286	412034	-	-
pmp000237	C26H26O15	[M+H]+	Apigenin-6-C-(2''-glucuronyl)xyloside	Flavonoids	Flavones	-	4491415	2284855	3617035	1.18738e+06	5565020	1.55745e+06	2386505	2557770	1836775	2766620	2690180	3258535	-	-
Wagp006988	C19H18O7	[M+H]+	4'-Hydroxy-5,6,7,8-Tetramethoxyflavone	Flavonoids	Flavones	36950-98-8	729386	906907	741621	703380	754637	1.02409e+06	803367	874282	799522	843051	810710	685769	-	-
Zmhp002814	C16H12O6	[M+H]+	5,7,8-Tetrahydroxy-6-methoxyflavone*	Flavonoids	Flavones	-	97619.3	149889	149995	124708	123655	229801	144969	142323	137066	120370	146972	125645	-	-
pmp001106	C27H30O15	[M+H]+	Vitexin-2''-O-glucoside	Flavonoids	Flavones	61360-94-9	1.00945e+06	711270	692832	949512	1.24869e+06	1.20269e+06	1.09356e+06	1.1305e+06	1.08786e+06	973881	1.22237e+06	1.1126e+06	C04024	ko00944
Lmpp003930	C30H26O12	[M+H]+	Apigenin-7-O-(6''-p-Coumaryl)glucoside	Flavonoids	Flavones	-	3.10012e+06	1.08297e+06	1.10979e+06	610082	3.45233e+06	2.55511e+06	1.73498e+06	1.82241e+06	1.51807e+06	1.53044e+06	1.21573e+06	1.43168e+06	-	-
pme3227	C27H30O14	[M+H]+	Vitexin-2''-O-rhamnoside	Flavonoids	Flavones	64820-99-1	2.04192e+06	855900	853292	917717	2.0604e+06	1632246	982163	1.55213e+06	606815	1.1779e+06	1.50195e+06	1.44344e+06	C12628	ko00944
Lmyp005841	C21H20O9	[M+H]+	Chrysin-7-O-glucoside*	Flavonoids	Flavones	31025-53-3	264037	184509	132830	242293	366474	310558	239590	313979	238421	229713	264119	295977	-	-
Lmnp102580	C26H28O14	[M+H]+	Apigenin-6-C-(2''-xylosyl)glucoside	Flavonoids	Flavones	-	51820.1	14158.3	8340	73355	53350	76690	46949.2	56685	36866.7	81695	65456.6	66685	-	-
Hajp008607	C19H16O7	[M+H]+	5,7,3'-trimethoxy-4',5'-methylenedioxyflavone	Flavonoids	Flavones	-	36959.2	44669	87743.3	106443	37399.1	105338	70684.3	126975	90932.4	64769.2	60199.3	50214.4	-	-
Zmjp005288	C25H28O14	[M+H]+	5,2',5'-Trihydroxy-3,7,4'-trimethoxyflavone-2'-O-glucoside	Flavonoids	Flavones	-	1.70587e+07	3.02357e+07	3.36833e+07	1.952e+07	2.41558e+07	3.24215e+07	2.45011e+07	3.61231e+07	2.7523e+07	2.82607e+07	2.27343e+07	2.89391e+07	-	-
Lmhp003162	C34H42O21	[M+H]+	Chrysoeriol-6,8-di-C-glucoside-4'-O-glucoside	Flavonoids	Flavones	-	108380	251015	270260	77907.6	143410	151505	190130	138405	202657	236870	195140	186795	-	-
mws1660	C26H28O14	[M+H]+	Schaftoside	Flavonoids	Flavones	51938-32-0	41970	70173.7	38345	53350	41949	135070	113969	136735	93370	135070	117613	103375	C10181	-
Hmlp005624	C16H12O5	[M+H]+	3',7-dihydroxy-4'-methoxyflavone	Flavonoids	Flavones	-	89643.4	176878	89195.6	97222.1	99845.7	125361	141122	126020	98678.8	95083.4	123839	103565	-	-
Hmgp003086	C29H34O16	[M+H]+	Tricin-7-O-rutinoside	Flavonoids	Flavones	-	1.61175e+06	9.40824e+06	9.03437e+06	1.45231e+06	1.93805e+06	2.15958e+06	1.35946e+06	3.50046e+06	781894	3.32441e+06	2.78772e+06	3.69952e+06	-	-
MW0139483	C27H30O16	[M-H]-	Quercetin 3-(2-glucosylrhamnoside)	Flavonoids	Flavones	143016-74-4	708863	1.14944e+06	1294190	1.89137e+06	783982	1.03219e+06	1.1975e+06	1.22942e+06	1.00663e+06	774768	988343	1.01168e+06	-	-
MW0133376	C18H16O8	[M+Na]+	4H-1-Benzopyran-4-one, 5,7-dihydroxy-2-(4-hydroxyphenyl)-3,6,8-trimethoxy-	Flavonoids	Flavones	57393-71-2	3.78507e+06	4.80341e+06	4.93442e+06	4.34881e+06	3.27108e+06	3.77087e+06	5.29932e+06	4.14689e+06	3.15459e+06	3.38734e+06	3.99803e+06	4.52472e+06	-	-
pmb0676	C38H40O19	[M+H]+	Chrysoeriol-8-C-glucoside-7-O-(6''-feruloyl)glucoside	Flavonoids	Flavones	-	420831	171775	149759	186833	372796	201853	330870	174327	310751	233766	214199	174364	-	-
Wahp006113	C24H26O12	[M+H]+	Rhamnazine-4'-O-β-D-glucoside	Flavonoids	Flavones	-	634171	514508	558390	313133	454165	1.13616e+06	392398	426647	481189	458273	591405	468176	-	-
pmb0578	C32H30O15	[M+H]+	Luteolin-7-O-(6''-sinapoyl)glucoside	Flavonoids	Flavones	-	192632	229620	367319	160926	220310	210446	174984	176482	148315	228101	168406	199913	-	-
Wagp006265	C26H30O14	[M+H]+	3,6,7,2',4'-Pentamethylquercetagetin 3'-O-Beta-D-Glucoside	Flavonoids	Flavones	-	1.30854e+06	2.14859e+06	2.15035e+06	1.19702e+06	1.69116e+06	1.88568e+06	1.51392e+06	2.03871e+06	1.66089e+06	1.48084e+06	1.94391e+06	1.55254e+06	-	-
Lmsp004632	C15H10O6	[M+H]+	Scutellarein (5,6,7,4'-Tetrahydroxyflavone)	Flavonoids	Flavones	529-53-3	2.75497e+06	2.95561e+06	4.13561e+06	4.3629e+06	2.69508e+06	7.23002e+06	4.25263e+06	7006640	2.05416e+06	3.91357e+06	5224125	5.17075e+06	C10184	-
pmb3042	C23H24O12	[M-H]-	Tricin-5-O-Glucoside	Flavonoids	Flavones	32769-00-9	3.32545e+06	9.13815e+06	7.85135e+06	3.81235e+06	3.01877e+06	4.74995e+06	3.35632e+06	3.33976e+06	3.74227e+06	4.55265e+06	4.60957e+06	5.96869e+06	-	-
pmb0613	C33H40O20	[M+H]+	Apigenin-6,8-di-C-glucoside-4'-O-glucoside	Flavonoids	Flavones	-	24353.9	43173.3	108233	52958.4	56226.7	61362.6	61928.8	48345	68456.3	61685	65943.7	47873.4	-	-
pmp001288	C28H32O14	[M+H]+	Acacetin-7-O-rutinoside (Linarin)	Flavonoids	Flavones	480-36-4	103625	65900.7	140976	91680.5	117035	105516	53877	64491.2	175934	441871	623301	517828	-	-
Hmgp002189	C22H22O11	[M+H]+	Hispidulin-7-O-glucoside(Homoplantaginin)*	Flavonoids	Flavones	17680-84-1	8.72057e+06	8.44762e+06	6.59831e+06	4.20914e+06	7.51076e+06	5.42477e+06	5.94028e+06	5.33496e+06	4.47041e+06	4.11379e+06	4.40635e+06	5.65143e+06	C17762	-
Jmbp005771	C19H18O8	[M+H]+	Gardenin D	Flavonoids	Flavones	29202-00-4	167544	111859	136368	240942	142554	295554	148818	161221	193875	163394	121960	170940	-	-
pmp000579	C22H22O11	[M+H]+	Diosmetin-7-O-galactoside*	Flavonoids	Flavones	-	4.2307e+06	7.1565e+06	9.26963e+06	6.52747e+06	4.80934e+06	5.98832e+06	4.41802e+06	4.98207e+06	5.2023e+06	7.20022e+06	5.20922e+06	5.61754e+06	-	-
Lmjp003655	C22H22O11	[M+H]+	6-C-MethylKaempferol-3-glucoside*	Flavonoids	Flavones	-	5.95433e+06	7.67651e+06	6.72454e+06	5.70245e+06	5.18512e+06	5.76566e+06	7.16838e+06	4.31593e+06	6.00233e+06	5.88178e+06	5.67046e+06	7.72473e+06	-	-
Lmgp004784	C15H14O5	[M+H]+	Apiferol	Flavonoids	Flavones	55167-29-8	265264	72225.3	106388	416776	247899	337217	454365	429421	210613	292317	293174	208124	-	-
pmb0580	C21H20O9	[M+H]+	Chrysin-5-O-glucoside (Toringin)*	Flavonoids	Flavones	1329-10-8	295196	137196	194209	265983	232905	197910	218580	308713	204768	242282	264610	178219	-	-
mws1608	C21H20O11	[M-H]-	Luteolin-6-C-glucoside (Isoorientin)	Flavonoids	Flavones	4261-42-1	60131.3	141007	181289	106638	67173	105516	86954	54595.4	91467.6	78007.1	113384	112603	C01821	-
pmp000236	C26H28O14	[M+H]+	Isovitexin-8-O-xyloside	Flavonoids	Flavones	-	104816	105045	30949	109951	83295.9	112741	142395	109972	220175	79772.8	99393.9	119657	-	-
pmb0678	C37H38O18	[M+H]+	Vitexin-7-O-(6''-feruloyl)glucoside	Flavonoids	Flavones	-	415769	57539.9	117953	201244	360003	153885	313685	320872	139135	177185	228892	266934	-	-
pmp000587	C24H22O14	[M+H]+	Luteolin-7-O-(6''-malonyl)glucoside	Flavonoids	Flavones	-	135323	156358	282046	439015	584154	296447	169291	629725	198747	203554	151006	228520	C10103	-
Lmtp002474	C26H28O14	[M+H]+	Apigenin-6-C-(2''-glucosyl)arabinoside	Flavonoids	Flavones	-	84767.5	78006.8	72578.6	87771.1	73355	69073.6	76690	95494.2	61518.4	111715	83900.1	76598.7	-	-
Zmhp002714	C16H12O6	[M+H]+	5,6,7-Tetrahydroxy-8-methoxyflavone*	Flavonoids	Flavones	-	105263	81121	262550	125539	149951	193266	195595	174788	155055	133397	180822	208393	-	-
Zasp003415	C25H24O13	[M+H]+	Kaempferol 3-(3'',4''-diacetylglucoside)	Flavonoids	Flavones	-	1.94201e+07	15651265	1.70331e+07	1.16294e+07	2.03376e+07	1.84416e+07	1.81821e+07	1.32673e+07	10676015	1.45006e+07	1.62099e+07	10340895	-	-
pmp000583	C22H20O12	[M+H]+	Diosmetin-7-O-glucuronide	Flavonoids	Flavones	35110-20-4	103320	525975	171775	286960	77844.9	134415	91558.7	103375	102146	159412	196240	125052	-	-
pmb1108	C33H40O21	[M+H]+	Luteolin-6,8-di-C-glucoside-7-O-glucoside	Flavonoids	Flavones	-	60605.7	102988	157193	110631	97894	110121	146538	96907.8	76771.5	78796.4	121453	92121.5	-	-
MW0131473	C17H14O8	[M+H]+	5,7,3',4'-Tetrahydroxy-6,8-dimethoxyflavone	Flavonoids	Flavones	57093-50-2	2105455	1.79978e+06	1.50334e+06	2824405	2423790	3071105	1.2972e+06	1.32804e+06	1.55492e+06	1.60152e+06	2354305	1.59065e+06	-	-
Lmyp004963	C27H30O14	[M+H]+	Apigenin-6-C-(2''-rhamnosyl)glucoside	Flavonoids	Flavones	-	145080	68450.5	75025	47961.7	91700	34750.4	80025	82840.1	105721	59387.6	88139.8	58156.3	-	-
mws0048	C21H20O10	[M-H]-	Apigenin-8-C-Glucoside (Vitexin)*	Flavonoids	Flavones	3681-93-4	64727.1	56844.6	40102.9	62274.7	61012.5	79596.8	53926.7	51991.4	82504.7	90035	77437.8	53837.7	C01460	ko00941,ko00944
MWSslk165	C28H32O15	[M+H]+	Diosmetin-7-O-Neohesperidoside (Neodiosmin)	Flavonoids	Flavones	38665-01-9	76690	164007	204210	28672.1	106710	28230.5	55350.4	34100.2	91700	55015	93955.8	80944.8	-	-
pmp000577	C26H20O8	[M+H]+	Acacetin-7-O-glucuronide	Flavonoids	Flavones	-	78980.6	45621.1	21897.8	78607.5	67026.3	64296.6	57190.9	81279.5	64617.2	76162.1	52696.5	92933.3	-	-
HJAP012	C20H18O10	[M+H]+	Luteolin-8-C-arabinoside	Flavonoids	Flavones	-	849227	745630	211256	317083	203485	807921	210074	603367	417189	394822	704085	655761	-	-
pmp000239	C26H26O16	[M+H]+	Luteolin-6-C-(5''-glucuronyl)xyloside	Flavonoids	Flavones	-	53318.4	70020	113385	32915.1	27092.7	58726.9	61685	63062.1	71690	60493.1	44302.4	80506.2	-	-
mws1299	C21H20O11	[M+H]+	Luteolin-8-C-glucoside (Orientin)	Flavonoids	Flavones	28608-75-5	783825	683783	891115	817345	797730	815665	951505	572473	996058	690248	1052210	1.28326e+06	C10114	-
Lagp004545	C27H28O16	[M+H]+	5,2',5'-Trihydroxy-3,7,4'-trimethoxyflavone-2'-O-β-D-malonylglucoside*	Flavonoids	Flavones	-	441932	613396	756236	441219	645978	611512	592666	605170	676864	413091	754574	718650	-	-
pmb0680	C36H36O17	[M+H]+	Vitexin-7-O-(6''-p-coumaroyl)glucoside	Flavonoids	Flavones	-	332060	71091.5	51907.2	36675	148514	103375	63350	140075	101631	88365	48448.1	88886.9	-	-
Hmgp002036	C22H22O12	[M+H]+	Nepetin-7-O-glucoside(Nepitrin)	Flavonoids	Flavones	569-90-4	2.22451e+07	3841125	55456100	3.87394e+07	3497435	86861405	4027850	73025620	3316515	82203630	4.16426e+07	68178285	-	-
pmb0717	C27H26O11	[M+H]+	Tricin-5-O-guaiacylglycerol	Flavonoids	Flavones	-	23340	101854	93370	61388.8	48477.8	98202.7	27443.2	43345	23340	70038.8	43534.4	86044.2	-	-
Hmjp003008	C27H28O16	[M+H]+	Luteolin-7-O-glucuronide-5-O-rhamnoside	Flavonoids	Flavones	-	1.35515e+06	180531	409206	1.5031e+06	1.47847e+06	1.25625e+06	1.57895e+06	2.30762e+06	1.57627e+06	782957	1.27833e+06	1.55015e+06	-	-
pmb0713	C29H34O17	[M+H]+	Tricin-7-O-(2''-O-glucosyl)glucoside	Flavonoids	Flavones	-	509245	439290	980030	731880	353101	832688	400281	763996	438429	438488	889440	770415	-	-
Wagp006694	C27H32O14	[M+H]+	Gardenin 5-O-Glucoside	Flavonoids	Flavones	-	180526	358475	436849	279177	261082	699185	220843	213347	528168	298821	463256	237657	-	-
MWSHY0121	C21H18O12	[M+H]+	Luteolin-7-O-glucuronide*	Flavonoids	Flavones	29741-10-4	905331	3983285	2.88114e+06	1.22243e+06	1015280	1.02563e+06	1280740	1.79724e+06	1242065	2698670	3.06104e+06	1.42106e+06	C03515	ko00944
MWSHY0035	C21H18O12	[M+H]+	Scutellarein-7-O-glucuronide (Scutellarin)*	Flavonoids	Flavones	27740-01-8	905331	3983285	2.88114e+06	1.22243e+06	1015280	1.02563e+06	1280740	1.79724e+06	1242065	2698670	3.06104e+06	1.42106e+06	-	-
pmb0660	C36H36O18	[M+H]+	Isoorientin-7-O-(6''-p-coumaroyl)glucoside	Flavonoids	Flavones	-	33340	19132.8	12854.5	23340	15941.3	8340	18331.3	19563.9	28781.5	20005	12035.3	26286.2	-	-
Zmjp004610	C25H28O13	[M+H]+	5,4'-Dihydroxy-3,6,7,3'-tetramethoxyflavone-4'-O-glucoside	Flavonoids	Flavones	23279-19-8	544778	1745640	928209	528388	850870	760385	865965	580997	1252150	1210125	615932	733490	-	-
Lajp005489	C26H30O13	[M+H]+	5-hydroxy-6,7,3',4',5'-pentamethoxyflavone glucoside*	Flavonoids	Flavones	-	4.91476e+06	7.00022e+06	1.0332e+07	3.31041e+06	3.834e+06	9464600	3.73959e+06	3.17993e+06	5.0261e+06	7615065	4.37508e+06	9722840	-	-
Wagp004812	C24H26O11	[M+H]+	5-Hydroxy-6,7,4'-Trimethoxyflavone 5-O-glucoside	Flavonoids	Flavones	-	1.37434e+06	974698	1.52116e+06	938085	1.30562e+06	2712260	1.73878e+06	1.80549e+06	2700370	1.56844e+06	1.27658e+06	2557770	-	-
pma6640	C22H22O12	[M+H]+	3'-O-Methyltricetin-7-O-glucoside	Flavonoids	Flavones	-	13481590	4.38238e+07	79806580	15640135	9.83388e+06	1.10907e+07	15820190	14879605	5.90351e+06	40454400	17069840	31935920	-	-
pmp000238	C26H28O15	[M+H]+	Luteolin-6-C-arabinoside-7-O-glucoside	Flavonoids	Flavones	-	151549	110017	99737.4	95518.9	143373	203516	190429	108709	165980	109350	203244	100040	-	-
Zmxp002867	C28H32O16	[M+H]+	Chrysoeriol-5,7-di-O-glucoside	Flavonoids	Flavones	-	56680.4	108716	75817	63350	37592.9	52529	71690	63350	38202.9	73355	67026.7	137722	-	-
pmb3006	C21H20O10	[M-H]-	Apigenin-7-O-glucoside(Cosmosiin)*	Flavonoids	Flavones	578-74-5	1023670	805610	1052210	995135	455580	1104270	468516	488044	862610	998495	1037100	387339	C04608	ko00944
Zmhp002734	C17H14O8	[M+H]+	5,7,2',5'-Tetrahydroxy-8,6'-dimethoxyflavone	Flavonoids	Flavones	-	6.0681e+06	7.80612e+06	6.98945e+06	9.79522e+06	7.74569e+06	1.98351e+07	1.44592e+07	1.44177e+07	1.70344e+07	1.07054e+07	3.72635e+06	1.08248e+07	-	-
Lmjp007670	C19H18O8	[M+H]+	Hymenoxin	Flavonoids	Flavonols	56003-01-1	5.47813e+06	4.62802e+06	5.61706e+06	8.4115e+06	5.14864e+06	1.05575e+07	6.94273e+06	8.55942e+06	8.20864e+06	6.54733e+06	6.5112e+06	6.54302e+06	-	-
Wayn006761	C30H26O13	[M-H]-	Quercetin 5-O-p-coumaroyl rhamnoside	Flavonoids	Flavonols	-	180485	333196	207153	468804	426763	763683	367686	367067	231128	350377	352244	353079	-	-
Lmjn007168	C17H14O7	[M-H]-	Quercetin-3,3'-dimethyl ether	Flavonoids	Flavonols	4382-17-6	4.74371e+06	4.21025e+06	4.00092e+06	5.39999e+06	5.3436e+06	7.3149e+06	4.96136e+06	5.61057e+06	4.90781e+06	5.20389e+06	5.24621e+06	5.19093e+06	-	-
Hmcp002399	C23H24O13	[M+H]+	Limocitrin-3-O-glucoside	Flavonoids	Flavonols	-	7.11993e+06	5.99593e+06	6.54532e+06	9.53401e+06	5.79408e+06	1.45854e+07	9.99396e+06	1.20634e+07	1.48215e+07	9.2817e+06	9.23897e+06	9.35446e+06	-	-
Hmgp004006	C17H14O7	[M+H]+	3,5,3'-Trihydroxy-7,4'-dimethoxyflavone (Ombuin)	Flavonoids	Flavonols	529-40-8	1.02567e+07	7.32592e+06	9.90953e+06	1.08229e+07	1.27841e+07	1.57791e+07	1.24694e+07	1.25666e+07	1.21331e+07	1.09884e+07	1.11406e+07	1.1116e+07	-	-
Lmmn004912	C16H12O7	[M-H]-	3-O-Methylquercetin	Flavonoids	Flavonols	1486-70-0	647451	1.38355e+06	285989	1.54409e+06	3.15757e+06	2.67035e+06	2.64156e+06	1.56944e+06	2.257e+06	1.74896e+06	1.76033e+06	1.77926e+06	C04443	ko00944,ko01110
Lmgn009690	C17H14O6	[M-H]-	3,5-Dihydroxy-7,4'-dimethoxyflavone	Flavonoids	Flavonols	15486-33-6	4.60893e+06	3.29873e+06	2.75447e+06	8.99595e+06	5.1753e+06	1.25493e+07	6.50087e+06	6.80737e+06	7.0256e+06	6.28785e+06	6.22727e+06	6.1563e+06	-	-
mws0056	C21H20O12	[M-H]-	Myricetin-3-O-rhamnoside (Myricitrin)	Flavonoids	Flavonols	17912-87-7	1.15608e+07	7.66502e+06	7.09563e+06	1.55604e+07	1.08725e+07	1.39045e+07	1.22461e+07	1.56099e+07	1.06211e+07	1.18097e+07	1.2071e+07	1.19493e+07	C10108	-
pmn001644	C23H20O14	[M-H]-	Quercetin-3-O-(2''-O-acetyl)glucuronide	Flavonoids	Flavonols	-	418972	291705	310968	401396	485292	618424	265398	353604	160849	368599	376401	369840	-	-
mws1173	C15H12O5	[M-H]-	Garbanzol	Flavonoids	Flavonols	1226-22-8	3.05718e+06	3.139e+06	3.18783e+06	3.06779e+06	3.49979e+06	3.23382e+06	3.27152e+06	3.18216e+06	3.33818e+06	3.05103e+06	3.11643e+06	3.10983e+06	C09751	ko00941
Wahp008174	C18H18O7	[M+H]+	7,3',4'-tetramethylquercetin	Flavonoids	Flavonols	-	2.31109e+06	1.48249e+06	1.79188e+06	2.44265e+06	2.70716e+06	3.256e+06	2.48081e+06	2.4611e+06	2.79512e+06	2.34989e+06	2.3453e+06	2.39532e+06	-	-
pmb0618	C28H34O16	[M+H]+	Hesperetin-8-C-glucoside-3'-O-glucoside	Flavonoids	Flavonols	-	854225	2800610	874936	1597245	1.54069e+06	2004005	2142670	1166430	2186665	1609045	1582080	1571965	-	-
mws1290	C30H26O13	[M-H]-	Kaempferol-3-O-(6''-p-Coumaroyl)glucoside (Tiliroside)	Flavonoids	Flavonols	20316-62-5	925091	1.62779e+06	2.53711e+06	1.14091e+06	1.16482e+06	1.45547e+06	972132	1.09782e+06	866899	1.24475e+06	1.25636e+06	1.27789e+06	C17140	-
mws1002	C17H14O8	[M-H]-	Syringetin	Flavonoids	Flavonols	4423-37-4	128788	142238	105255	171615	127026	233698	150913	148051	215732	151169	150721	146125	C11620	ko00944,ko01110
mws0038	C17H14O6	[M-H]-	5,4'-Dihydroxy-3,7-dimethoxyflavone(Kumatakenin)	Flavonoids	Flavonols	3301-49-3	1.00565e+07	6.62583e+06	6.2477e+06	1.84264e+07	1.10774e+07	2.4985e+07	1.32043e+07	1.34872e+07	1.42001e+07	1.31755e+07	1.34106e+07	1.2868e+07	-	-
Labp006038	C32H30O15	[M+H]+	Isorhamnetin feruloyl glucoside	Flavonoids	Flavonols	-	270945	494028	457823	343501	322979	400678	333841	315793	356565	351952	364923	350435	-	-
Lmgp008943	C18H16O7	[M+H]+	3,5-Dihydroxy-7,3',4'-trimethoxyflavone	Flavonoids	Flavonols	6068-80-0	4.31787e+06	2.46982e+06	3.26056e+06	7.09856e+06	4.66482e+06	9.80727e+06	5.06021e+06	6.77379e+06	6.35643e+06	5.28071e+06	5.14298e+06	5.38755e+06	-	-
pmn001583	C27H30O16	[M-H]-	Quercetin-3-O-robinobioside	Flavonoids	Flavonols	52525-35-6	796596	868522	860865	841989	914642	1.03539e+06	1.02508e+06	1.00844e+06	854939	903650	932927	891400	-	-
Hmlp002821	C21H18O14	[M+H]+	Myricetin-3-O-glucuronide	Flavonoids	Flavonols	77363-65-6	3.85593e+06	6.36204e+06	4.99938e+06	5.7005e+06	4.06562e+06	6.09237e+06	6.08437e+06	4.68529e+06	4.00865e+06	5.08124e+06	4.87616e+06	5.09918e+06	-	-
Wayn006883	C30H26O13	[M-H]-	Quercetin 7-O-p-coumaroyl rhamnoside	Flavonoids	Flavonols	-	239862	354390	262239	588174	479682	915287	495516	453373	304623	431392	450795	455112	-	-
Lazp007726	C17H14O6	[M+H]+	Tupichinol E	Flavonoids	Flavonols	-	2.05815e+07	1.27865e+07	1.26103e+07	3.90112e+07	2.48332e+07	4.86067e+07	2.57487e+07	2.62351e+07	2.83714e+07	2.55934e+07	2.65267e+07	2.50391e+07	-	-
Zblp003511	C16H14O6	[M+H]+	5,7,4'-Trihydroxy-8-methylflavonoid	Flavonoids	Flavonols	-	980302	1.00686e+06	824105	910082	1.13508e+06	1.21125e+06	1.11188e+06	975786	945007	987187	1.03878e+06	1.03905e+06	-	-
Lmcp003402	C22H22O12	[M+H]+	Tamarixetin-3-O-glucoside (Tamarixin)	Flavonoids	Flavonols	27542-39-8	9.30159e+06	5.20938e+07	3.63141e+07	1.02195e+07	1.44875e+07	1.79065e+07	1.06709e+07	7.25569e+06	7.90461e+06	1.84322e+07	1.82572e+07	1.93293e+07	-	-
pmp000117	C22H24O9	[M+H]+	3,5,6,7,8,3',4'-Heptamethoxyflavone	Flavonoids	Flavonols	1178-24-1	1.72871e+06	2.36742e+06	1.46511e+06	1.05302e+06	1.04515e+06	857210	1.73492e+06	1.71567e+06	1.93905e+06	1.40948e+06	1.49946e+06	1.42641e+06	-	-
Lmyn001269	C27H30O16	[M-H]-	Kaempferol-3-O-sophoroside	Flavonoids	Flavonols	19895-95-5	742302	159756	140042	295824	766482	501472	531149	655771	606709	447275	475539	478099	C12634	ko00944,ko01110
mws0059	C27H30O16	[M-H]-	Quercetin-3-O-rutinoside (Rutin)	Flavonoids	Flavonols	153-18-4	822334	1.05868e+06	826212	1.10759e+06	1.0345e+06	1.15118e+06	1.18111e+06	1.19799e+06	997025	892460	946298	965460	C05625	ko00944,ko01100,ko01110
Lmpn006208	C22H22O11	[M-H]-	8-Methoxykaempferol-7-O-rhamnoside	Flavonoids	Flavonols	-	9.7527e+06	1.9273e+07	4.70816e+06	15043965	6.65607e+06	7.47486e+06	2.05824e+07	7.97859e+06	7.66208e+06	5.87838e+06	6.37574e+06	6.14373e+06	-	-
mws0917	C17H14O7	[M-H]-	3,7-Di-O-methylquercetin	Flavonoids	Flavonols	2068-02-2	8.07126e+06	8.67206e+06	1.31527e+07	1.22048e+07	6.95456e+06	1.52024e+07	9.72634e+06	8.76379e+06	1.28653e+07	9.05708e+06	9.04663e+06	9.7117e+06	C01265	ko00944,ko01110
Lmsn002815	C27H30O15	[M-H]-	Kaempferol-3-O-rutinoside(Nicotiflorin)	Flavonoids	Flavonols	17650-84-9	1.77863e+06	1.57764e+06	1.88619e+06	2.54908e+06	1.6796e+06	2.66778e+06	2.21711e+06	2.24507e+06	2.28024e+06	2.10142e+06	1.93734e+06	1.99407e+06	C21833	ko00944,ko01110
Hmdp001794	C35H28O20	[M+H]+	Quercetin-3-O-(2'',3''-O-digalloyl)-glucoside	Flavonoids	Flavonols	-	30010	16134.3	18071.8	13671.5	45070.3	18205.5	35010	22757	53135.5	25005	27037.8	27013.9	-	-
Lahp004593	C23H24O12	[M+H]+	Flavoyadorinin A	Flavonoids	Flavonols	-	3.29022e+07	5.48316e+07	48057416	4.28081e+07	3.52547e+07	5.82543e+07	5.10287e+07	5.47942e+07	5.26863e+07	4.20524e+07	4.59759e+07	4.45416e+07	-	-
Zayn005572	C28H24O15	[M-H]-	Quercetin-3-(2''-galloyl)rhamnoside	Flavonoids	Flavonols	-	6.257e+06	1.02006e+07	5.86088e+06	9.70394e+06	5.37228e+06	9.00562e+06	9.10443e+06	8.99386e+06	7.77037e+06	8.4727e+06	7.75131e+06	8.01998e+06	-	-
pme3514	C15H10O7	[M-H]-	Morin	Flavonoids	Flavonols	480-16-0	1.50771e+06	1.20712e+06	889015	2.10654e+06	2.3734e+06	2.89292e+06	2.04649e+06	2.15217e+06	1.94572e+06	1.81048e+06	1.99144e+06	1.95363e+06	C10105	-
pmn001641	C22H20O12	[M-H]-	Kaempferide-3-O-glucuronide	Flavonoids	Flavonols	-	1568595	1299240	1826645	2386505	2781915	4207945	2671500	2168050	1921210	2649425	2472960	2405145	-	-
Li512111	C24H24O13	[M-H]-	Isorhamnetin-3-O-(6''-acetylglucoside)	Flavonoids	Flavonols	-	504465	1.05074e+06	886783	928918	588496	1.18199e+06	582863	512576	658504	738290	755250	812242	-	-
pmb0645	C28H34O16	[M+H]+	Hesperetin-6-C-glucoside-7-O-glucoside	Flavonoids	Flavonols	-	884180	934163	888702	1.01504e+06	906764	1.2688e+06	1.04942e+06	886692	771556	1.16032e+06	1.06009e+06	1.15936e+06	-	-
Lmpp005784	C21H20O12	[M+H]+	6-Methoxyquercetin-3-O-Xyloside	Flavonoids	Flavonols	-	5.00686e+06	5.44389e+06	3.62724e+06	5.65128e+06	5.50519e+06	5.83186e+06	5.62671e+06	6.39185e+06	6.2021e+06	5.75246e+06	5.19535e+06	5.4319e+06	-	-
Hmcp002539	C22H22O11	[M+H]+	Isorhamnetin-3-O-rhamnoside	Flavonoids	Flavonols	-	2.80987e+06	3.42704e+06	1.90155e+06	4.88277e+06	4.25601e+06	5.1212e+06	4.44837e+06	4.13053e+06	3.40223e+06	3.30021e+06	3.57109e+06	3.65532e+06	-	-
Zmhn002574	C28H32O16	[M-H]-	Rhamnazin 3-Glucosyl-Arabinofuranoside	Flavonoids	Flavonols	-	168831	356160	329037	273948	171577	317275	171597	153115	206700	221324	246106	230715	-	-
Lmcp004369	C17H14O7	[M+H]+	Quercetin-3',4'-dimethyl ether	Flavonoids	Flavonols	3306-29-4	7.01287e+06	9.43067e+06	8.29968e+06	8.38154e+06	7.94129e+06	8.75661e+06	7.29386e+06	7.2213e+06	7.61292e+06	7.32894e+06	8.01448e+06	8.10559e+06	-	-
Lahp004500	C32H30O16	[M+H]+	Quercetin-sinapyl-glucoside	Flavonoids	Flavonols	-	2.9685e+06	8.31527e+06	8.14598e+06	7972185	2.44256e+06	2.85423e+06	1.93602e+06	2804010	2.35202e+06	5.13505e+06	4.71342e+06	4.64036e+06	-	-
Lmgp005640	C22H22O12	[M+H]+	Isorhamnetin-3-O-Galactoside; Cacticin	Flavonoids	Flavonols	6743-92-6	826317	2.33208e+06	1.58468e+06	1.31909e+06	1.19133e+06	1.78422e+06	1.55066e+06	1.50901e+06	1.18455e+06	1.5098e+06	1.36239e+06	1.5041e+06	-	-
HJAP148	C26H28O15	[M+H]+	Kaempferol-3-O-sambubioside	Flavonoids	Flavonols	27661-51-4	477700	1.16965e+06	1.29309e+06	818918	1.23952e+06	923977	1.04768e+06	766266	395330	1.04519e+06	1.07482e+06	1.16754e+06	-	-
Lmfn004769	C27H22O15	[M-H]-	Quercetin-3-O-(4''-O-galloyl)arabinoside	Flavonoids	Flavonols	-	2.38783e+07	6.08307e+07	3.09372e+07	4.72958e+07	1.98844e+07	5.55663e+07	4.53621e+07	4.83362e+07	34026116	3.69362e+07	3.46903e+07	3.89901e+07	-	-
mws0988	C16H12O7	[M-H]-	Rhamnetin; 3,5,3',4'-Tetrahydroxy-7-Methoxyflavone	Flavonoids	Flavonols	90-19-7	116391	118839	136095	107104	124782	136309	94926.3	137251	116412	118401	112670	105059	C10176	-
Lmdp003808	C16H12O7	[M+H]+	Azaleatin (5-O-Methylquercetin)	Flavonoids	Flavonols	529-51-1	713850	884552	896564	1.04677e+06	830204	1.82366e+06	1.31361e+06	1.54764e+06	1.38149e+06	1.08345e+06	1.13218e+06	1.21968e+06	C10022	-
Lmsp004670	C27H30O15	[M+H]+	Kaempferol-3-O-glucoside-7-O-rhamnoside	Flavonoids	Flavonols	2392-95-2	1.52554e+06	1.32404e+06	198475	2.00025e+06	1.42068e+06	1.64611e+06	6992640	3.46571e+06	2.55535e+06	2.04754e+06	2.12913e+06	2.30299e+06	-	-
HJAP006	C23H24O13	[M+H]+	Syringetin-7-O-glucoside*	Flavonoids	Flavonols	-	3.02098e+06	4.92836e+06	5.49225e+06	2.90636e+06	2.65356e+06	4.70604e+06	3.18061e+06	3.92991e+06	4.60099e+06	3.43627e+06	3.47351e+06	3.82916e+06	-	-
Lmzn001894	C21H18O12	[M-H]-	Kaempferol-3-O-glucuronide*	Flavonoids	Flavonols	22688-78-4	2.84847e+06	4.74379e+06	4.49521e+06	3.902e+06	2.70202e+06	2.24983e+06	3.51982e+06	2.72504e+06	3.17062e+06	3.05782e+06	3.16699e+06	3.44014e+06	-	-
Lmln001951	C26H28O16	[M-H]-	Quercetin-3-O-(6''-O-arabinosyl)glucoside	Flavonoids	Flavonols	-	648954	1.38504e+07	1.28271e+07	3.52422e+06	3.03857e+06	3.70803e+06	3.85943e+06	2.53616e+06	1.6728e+06	5.19176e+06	5.33528e+06	4.73022e+06	-	-
mws0919	C21H20O10	[M-H]-	Kaempferol-3-O-rhamnoside (Afzelin)(Kaempferin)	Flavonoids	Flavonols	482-39-3	1.77911e+07	2.09307e+07	1.51458e+07	2.36795e+07	2.25874e+07	2.53141e+07	2.38146e+07	2.57558e+07	2.12862e+07	2.14544e+07	1.97189e+07	2.23959e+07	C16911	ko00944
MWSHY0142	C28H24O16	[M+H]+	Quercetin-3-O-(2''-O-galloyl)galactoside	Flavonoids	Flavonols	53209-27-1	233757	679648	568036	379113	241094	125060	399041	351384	315446	322029	351041	367369	-	-
pme2954	C15H10O7	[M+H]+	Quercetin	Flavonoids	Flavonols	117-39-5	552593	4.68731e+06	4.09009e+06	1.26274e+06	1.26133e+06	1.24422e+06	556174	1.01769e+06	651522	1.48337e+06	1.60557e+06	1.69804e+06	C00389	ko00941,ko00944,ko01100,ko01110
Lmfn005486	C15H10O9S	[M-H]-	Kaempferol-3-O-sulfonate	Flavonoids	Flavonols	-	87791	26047.3	11170.5	57122	118864	77498	115345	60572.9	67273.6	82556.8	84737.1	74350.4	-	-
Xmyp005654	C21H20O11	[M+H]+	Kaempferol-4'-O-glucoside	Flavonoids	Flavonols	-	3.21776e+07	1.31644e+07	4759930	2.29215e+07	3.99581e+07	3.23954e+07	3.04774e+07	2.30418e+07	2.36236e+07	2.61455e+07	28053295	3.01772e+07	-	-
Lmmp004257	C22H22O11	[M+H]+	6-C-Methylquercetin-3-O-rhamnoside	Flavonoids	Flavonols	-	2.42615e+06	2.5606e+06	1.9391e+06	3.71223e+06	4.22144e+06	4.18168e+06	4.10924e+06	3.76976e+06	3.26382e+06	3.05555e+06	3.34515e+06	3.52887e+06	-	-
mws4183	C20H18O11	[M-H]-	Quercetin-3-O-arabinoside	Flavonoids	Flavonols	22255-13-6	1.73076e+06	2.6735e+06	2.41617e+06	3.69246e+06	2.97187e+06	3.71925e+06	2.90844e+06	2.71267e+06	2.30904e+06	2.58366e+06	2.98514e+06	2.78329e+06	-	-
Hmcp002207	C22H22O12	[M+H]+	Isorhamnetin-7-O-glucoside (Brassicin)	Flavonoids	Flavonols	6743-96-0	1390090	1.29863e+06	1698405	2906025	1.60129e+06	1.50361e+06	1.63356e+06	1.49331e+06	1467191	1.47642e+06	1.59558e+06	1.3744e+06	-	-
Lmmn006022	C22H22O11	[M-H]-	Rhamnetin-3-O-rhamnoside	Flavonoids	Flavonols	20188-83-4	4.07027e+06	3.77241e+06	2.4784e+06	5.25249e+06	5.24233e+06	6.08975e+06	5.74375e+06	4.69964e+06	798654	4.22082e+06	4.76713e+06	4.16809e+06	-	-
Hmcp001829	C27H30O15	[M+H]+	Quercetin-3,7-Di-O-rhamnoside	Flavonoids	Flavonols	28638-13-3	351875	78765.6	77027.3	247902	249690	187463	328288	557629	466481	233438	252288	216593	-	-
Hmln002321	C24H22O15	[M-H]-	Quercetin-3-O-(6''-O-malonyl)glucoside	Flavonoids	Flavonols	-	143812	3.1626e+06	1.65745e+06	284434	75783.8	356556	248738	158778	96237.1	628527	709480	618260	C12638	ko00944
HJAP155	C21H20O12	[M+H]+	Laricitrin-3-O-xyloside	Flavonoids	Flavonols	-	4.8002e+06	4.91324e+06	3.67188e+06	5.75524e+06	4.7238e+06	5.71261e+06	5.7458e+06	5.55953e+06	6.21036e+06	5.73815e+06	4.94546e+06	5.59467e+06	-	-
Hmmn003659	C25H26O14	[M-H]-	Limocitrin-7-O-(6''-Acetyl)glucoside	Flavonoids	Flavonols	-	42365.1	27004.5	44247.5	51659.1	42878.8	78870.8	67784.4	73827.4	79535.8	51654.8	51003.6	44602.4	-	-
mws1329	C21H20O12	[M-H]-	Quercetin-7-O-glucoside	Flavonoids	Flavonols	491-50-9	232529	587868	967679	466779	680316	651601	483379	405399	330466	610704	542656	525676	C12639	-
Hmcp001636	C23H24O13	[M+H]+	Limocitrin-7-O-glucoside	Flavonoids	Flavonols	-	7.41684e+06	1.10381e+07	1.45839e+07	8.03325e+06	7.69992e+06	9.12879e+06	7.88954e+06	9.21761e+06	8.18925e+06	7.99796e+06	9.38583e+06	9.01433e+06	-	-
HJAP156	C22H22O12	[M+H]+	Laricitrin-3-O-rhamnoside	Flavonoids	Flavonols	-	1.13292e+06	1.39169e+06	1.00987e+06	1.44599e+06	1.35621e+06	1.67745e+06	1.63066e+06	1.70614e+06	1.60775e+06	1.22667e+06	1416278	1.23785e+06	-	-
Lssp210055	C27H30O15	[M+H]+	Kaempferol-3-hexoside rhamnose	Flavonoids	Flavonols	-	4.72226e+06	876149	889025	1.91805e+06	5.02005e+06	3.92377e+06	2.29982e+06	4.19671e+06	2.78172e+06	2.36229e+06	2.7381e+06	2.73185e+06	-	-
Lssp210056	C21H20O12	[M+H]+	Quercetin3-O-galactoside*	Flavonoids	Flavonols	-	1.49286e+06	6.56252e+06	2.27318e+06	3.67321e+06	2.91532e+06	5.70271e+06	4.74521e+06	2.55546e+06	2.64443e+06	3.16652e+06	3.66882e+06	3.17691e+06	-	-
Lmdp003286	C21H20O12	[M+H]+	Isohyperoside*	Flavonoids	Flavonols	35589-21-0	2.86204e+07	3.91471e+07	3.7678e+07	5.2188e+07	7.11606e+07	8.26958e+07	7.96013e+07	3.67207e+07	3.47761e+07	3.96904e+07	4.39961e+07	3.70173e+07	-	-
pmn001637	C20H18O10	[M-H]-	Kaempferol-3-O-arabinoside (Juglanin)	Flavonoids	Flavonols	5041-67-8	4.81762e+06	4.40733e+06	4.89245e+06	7.22834e+06	7.92874e+06	9.12713e+06	6.61626e+06	6.78726e+06	5.8544e+06	6.03049e+06	7.19074e+06	6.79557e+06	-	-
Hmcp001598	C27H30O16	[M+H]+	Isorhamnetin-3-O-(2''-O-xylosyl)glucoside	Flavonoids	Flavonols	-	1.36394e+06	3.90829e+06	3.60158e+06	994140	1.4862e+06	1.88592e+06	1.95436e+06	1.19306e+06	1.10214e+06	2.95912e+06	2.7404e+06	2.46869e+06	-	-
Lmfn003760	C21H18O13	[M-H]-	Quercetin-4'-O-glucuronide*	Flavonoids	Flavonols	201463-36-7	341011	845720	987665	614337	538047	939693	652973	636272	433475	664393	786148	688215	-	-
mws0089	C21H20O11	[M-H]-	Kaempferol-7-O-glucoside	Flavonoids	Flavonols	16290-07-6	8.11089e+06	7.11243e+06	4.1374e+06	6.80015e+06	8.08351e+06	9.82452e+06	6.75459e+06	7.15954e+06	5.89029e+06	7.22892e+06	7.1051e+06	8.39087e+06	-	-
Lmfn003630	C20H18O12	[M-H]-	Myricetin-3-O-xyloside*	Flavonoids	Flavonols	-	1.10101e+06	853433	680962	1.28646e+06	1.33096e+06	1.28537e+06	1.50996e+06	1.42113e+06	1.45949e+06	1.11067e+06	1.08456e+06	928682	-	-
mws1068	C15H10O6	[M-H]-	Kaempferol (3,5,7,4'-Tetrahydroxyflavone)	Flavonoids	Flavonols	520-18-3	117928	77166.9	83938.7	150387	139266	218760	131855	142014	165927	117997	119533	139765	C05903	ko00941,ko00944,ko01100,ko01110
Lmmp002796	C27H30O17	[M+H]+	Gossypetin-3-O-rutinoside	Flavonoids	Flavonols	-	2.16894e+06	1.05423e+06	2.30165e+06	2.54457e+06	1.67912e+06	2.26733e+06	1.15656e+06	2.2955e+06	2.64279e+06	2.02069e+06	1.70856e+06	1.71321e+06	-	-
Hmcp003223	C17H14O8	[M+H]+	Limocitrin (5,7,4'-trihydroxy-8,3'-dimethoxyflavone)	Flavonoids	Flavonols	489-33-8	412297	406718	452108	818174	366027	939538	926467	1.17919e+06	881808	570650	693770	658265	-	-
MWSHY0199	C28H24O16	[M+H]+	Quercetin-3-O-(6''-O-galloyl)galactoside	Flavonoids	Flavonols	53171-28-1	806803	2.39567e+06	1.90392e+06	1.1042e+06	1.84986e+06	1.54386e+06	3408655	2.0117e+06	2.0669e+06	1.95309e+06	1.58526e+06	1.76448e+06	-	-
mws0032	C15H10O8	[M+H]+	Myricetin	Flavonoids	Flavonols	529-44-2	4.71719e+06	3.54458e+06	3.12669e+06	5.35992e+06	4.84805e+06	4.84411e+06	4.60461e+06	5.51229e+06	5.33382e+06	3.77235e+06	4.55509e+06	4.64578e+06	C10107	ko00941,ko00944,ko01110
Hmcp002187	C23H24O13	[M+H]+	Limocitrin-3-O-galactoside*	Flavonoids	Flavonols	-	6.69972e+06	13085340	8.63537e+06	8.49179e+06	5.10103e+06	2.12855e+07	13988940	1.74945e+07	1.15993e+07	1.13209e+07	9.6249e+06	9.10397e+06	-	-
Lmyp003599	C28H24O15	[M+H]+	Kaempferol-3-O-(6''-galloyl)glucoside*	Flavonoids	Flavonols	56317-05-6	523425	927957	1.08393e+06	1.02921e+06	622394	607772	836685	724182	618002	661195	833185	738056	-	-
Lahp004712	C29H34O16	[M+H]+	Rhamnosyl-rhamnanthin-3-O-β-D-glucoside	Flavonoids	Flavonols	-	442052	2.0768e+06	2.21519e+06	444882	466458	597108	458786	562975	427715	754903	781511	933464	-	-
Lmfp004055	C20H18O11	[M+H]+	Morin-3-O-xyloside*	Flavonoids	Flavonols	-	2.01899e+07	3.11467e+07	2.62211e+07	7.1408e+07	3.63321e+07	5.58439e+07	9.65935e+07	4.70501e+07	2.58603e+07	2.99923e+07	3.73985e+07	3.68258e+07	-	-
HJN051	C28H32O16	[M-H]-	Tamarixetin-3-O-rutinoside	Flavonoids	Flavonols	-	3.03587e+06	2.52182e+06	2.79806e+06	3.81023e+06	3.22925e+06	4.90058e+06	4.52408e+06	4.4555e+06	5.03284e+06	3.56129e+06	3.30897e+06	4.20529e+06	-	-
Lmdp003509	C20H18O11	[M+H]+	Quercetin-3-O-xyloside (Reynoutrin)*	Flavonoids	Flavonols	549-32-6	3.44343e+07	2.25762e+07	2.75472e+07	3.63513e+07	4.09181e+07	7.69871e+07	4.26912e+07	3.94141e+07	3.08901e+07	3.25751e+07	4.0637e+07	3.29113e+07	-	-
Hmcp001578	C28H32O17	[M+H]+	Isorhamnetin-3,7-O-diglucoside	Flavonoids	Flavonols	6758-51-6	1001850	1215165	1497840	973320	1035420	1716960	1524790	1179870	1057250	1163070	1418705	1514685	-	-
Zmhp006502	C25H24O14	[M+H]+	Kaempferide-3-O-(6''-malonyl)glucoside	Flavonoids	Flavonols	-	160691	221752	162830	138137	131471	151092	111411	159397	247177	145226	179229	190972	-	-
pmn001640	C20H18O12	[M-H]-	Myricetin-3-O-arabinoside*	Flavonoids	Flavonols	132679-85-7	943163	765815	767471	1.62471e+06	1.01216e+06	1.59238e+06	1.52187e+06	1.56395e+06	1.1568e+06	1.40486e+06	1.11403e+06	1.09489e+06	-	-
Lmgp006006	C16H12O8	[M+H]+	3,5,8,3',4'-Pentahydroxy-7-methoxyflavone; Ranupetin	Flavonoids	Flavonols	-	129073	106433	102596	103883	83071.6	17807.9	22812.5	88571.7	110244	65391	52742.5	70507.2	-	-
mws0856	C21H20O12	[M-H]-	Quercetin-4'-O-glucoside (Spiraeoside)*	Flavonoids	Flavonols	20229-56-5	318131	570461	904764	642217	711241	679556	548786	448415	473100	507374	579521	679493	-	-
Lmcp005645	C17H14O7	[M+H]+	Quercetin-3,4'-Dimethyl Ether	Flavonoids	Flavonols	33429-83-3	106610	194322	254727	280171	188078	266586	278244	267914	206214	219784	211916	165216	-	-
Zmpp002571	C15H10O7	[M+H]+	Robinetin	Flavonoids	Flavonols	490-31-3	1.20701e+06	1.0767e+06	807310	979190	984917	1.1079e+06	937729	1.07594e+06	965503	794994	965550	1.07359e+06	C10177	-
Lmcp004624	C16H12O6	[M+H]+	3-Methylkaempferol	Flavonoids	Flavonols	1592-70-7	2330590	2.17307e+06	1.41839e+06	3028540	2073320	1.07976e+06	3420605	2576435	2838005	2924735	2378030	3229550	C05902	-
Lmjp002596	C26H28O16	[M+H]+	Quercetin-3-O-sambubioside*	Flavonoids	Flavonols	83048-35-5	673260	1.32429e+06	1289145	1348020	628848	586206	505796	462454	736905	981926	727341	810286	C12637	ko00944
pmp001309	C21H20O12	[M+H]+	6-Hydroxykaempferol-7-O-glucoside	Flavonoids	Flavonols	-	2.30978e+06	7655485	2.88542e+06	4.27677e+06	3.57576e+06	12248845	3.63677e+06	3.11783e+06	3.06295e+06	4.7066e+06	3.54018e+06	3.72032e+06	-	-
Lmyp004052	C30H26O14	[M+H]+	Quercetin-3-O-(6''-O-p-Coumaroyl)galactoside	Flavonoids	Flavonols	-	825514	1.19054e+06	5419565	1.73367e+06	1.41054e+06	1.88894e+06	906985	1.361e+06	592794	1.09664e+06	1.41014e+06	1.0732e+06	-	-
Lmpp003465	C21H20O13	[M+H]+	Myricetin-3-O-β-D-glucoside*	Flavonoids	Flavonols	19833-12-6	16998685	3.76816e+07	3.7639e+07	35475675	43060930	1.35302e+07	31558710	1.72643e+07	1.85043e+07	24932925	1.8655e+07	2.54002e+07	-	-
pmp001310	C27H30O17	[M+H]+	6-Hydroxykaempferol-3,6-O-Diglucoside	Flavonoids	Flavonols	-	333232	253330	368755	105045	325677	433304	376485	272397	329716	375642	267948	348396	-	-
Lmsp003729	C27H30O17	[M+H]+	Myricetin-3-O-rutinoside	Flavonoids	Flavonols	-	1.82555e+06	1.09684e+06	3178420	1.70614e+06	3026835	2907725	1.636e+06	3.17511e+06	3.95145e+06	2.04879e+06	1.44531e+06	1.69747e+06	-	-
mws2186	C20H18O11	[M+H]+	Avicularin(Quercetin-3-O-α-L-arabinofuranoside)*	Flavonoids	Flavonols	572-30-5	2.87813e+06	3.79011e+06	2.61674e+06	3.77341e+06	4.43926e+06	6.22595e+06	4.65041e+06	5.32868e+06	2.94539e+06	4.28304e+06	5.13885e+06	6.12592e+06	-	-
Hmln002199	C23H22O13	[M-H]-	Quercetin-3-O-(6''-O-acetyl)galactoside	Flavonoids	Flavonols	-	1.08463e+06	1.87988e+06	2.63665e+06	1.76488e+06	1.96325e+06	1.72238e+06	1.89615e+06	1.50778e+06	1.32255e+06	1.29571e+06	1.86226e+06	1.55957e+06	-	-
Lmyp003348	C28H24O15	[M+H]+	Kaempferol-3-O-(6''-galloyl)galactoside*	Flavonoids	Flavonols	-	654841	2.00082e+06	1.16782e+06	796259	745942	839930	871685	799115	926552	713909	960446	706130	-	-
MWSHY0046	C21H20O12	[M+H]+	Quercetin-3-O-glucoside (Isoquercitrin)*	Flavonoids	Flavonols	482-35-9	2.17486e+07	4.19273e+07	5.45313e+07	3.74902e+07	5.2468e+07	4.84602e+07	4.77581e+07	4.21589e+07	2.22293e+07	4.46277e+07	5.40309e+07	3.73915e+07	C05623	ko00944,ko01100,ko01110
Labp002580	C38H42O26	[M+H]+	Kaempferol acetyl malonyl glucosyl glucuronopyranosyl glucoside	Flavonoids	Flavonols	-	458334	847585	284694	501725	385106	527981	841999	875137	925396	650370	470524	486861	-	-
Lmsp003252	C28H32O17	[M+H]+	Isorhamnetin-3-O-sophoroside	Flavonoids	Flavonols	-	566920	880002	1663977	627292	715705	837420	437253	471247	355358	692587	986905	773787	-	-
MWSHY0064	C28H32O16	[M+H]+	Isorhamnetin-3-O-neohesperidoside*	Flavonoids	Flavonols	55033-90-4	2220515	380426	464095	7025885	5646470	4884030	1.5403e+06	1.94426e+06	2.56078e+06	2618865	2371250	1.75458e+06	-	-
Hmcp001628	C29H34O18	[M+H]+	Limocitrin-3,7-di-O-glucoside	Flavonoids	Flavonols	-	51283.8	105860	83365	90554.2	76690	133400	115947	185125	76197	81628	120876	115050	-	-
mws0066	C16H12O7	[M-H]-	Isorhamnetin; 3'-Methoxy-3,4',5,7-Tetrahydroxyflavone	Flavonoids	Flavonols	480-19-3	121701	110979	89699.5	153982	125895	196098	127698	135186	131482	164338	121938	111262	C10084	-
Lmtp004044	C26H28O16	[M+H]+	Quercetin-3-O-apiosyl(1→2)galactoside*	Flavonoids	Flavonols	-	306791	1.25794e+06	956799	68355	826382	621103	581914	677627	629252	733767	603160	932755	-	-
Lmmp003783	C21H18O13	[M+H]+	Quercetin-3-O-glucuronide	Flavonoids	Flavonols	22688-79-5	62960.8	175342	87100.9	110459	95876.6	65020	140383	102510	81260	119447	134332	83786.9	-	-
Lahp004989	C29H34O16	[M+H]+	3,7,3′-Tri-O-methylquercetin-4′-O-β-D-apiofuranosyl-(1→2)-O-β-d-glucopyranoside	Flavonoids	Flavonols	-	1.42779e+06	2.04534e+06	1.64903e+06	779963	1.25441e+06	1.35961e+06	1.03977e+06	937595	1.18386e+06	1.10338e+06	826021	1.36177e+06	-	-
Hmcp001629	C30H32O19	[M+H]+	Kaempferol-3-O-(6''-Malonyl)glucoside-7-O-Glucoside	Flavonoids	Flavonols	-	58053.6	55668.9	61184.3	52141.7	97731.3	121042	56685	126730	94845	82750.6	121958	136500	-	-
Lmmp003306	C25H26O15	[M+H]+	Quercetin-3-O-xylosyl(1→2)arabinoside	Flavonoids	Flavonols	-	31675	38565.1	43878.5	67644.1	41680	56815.2	26675	38345	34636.5	26191.5	18153.1	16988.2	-	-
HJAP005	C22H22O13	[M+H]+	Laricitrin-3-O-glucoside	Flavonoids	Flavonols	39986-90-8	32525190	1.90716e+07	30181325	33100055	2.03558e+07	40308535	2.02114e+07	2.37505e+07	2.24607e+07	1.92378e+07	28095570	18269612	-	-
Hmcp002298	C22H22O12	[M+H]+	Limocitrin-3-O-arabinoside	Flavonoids	Flavonols	-	5.10139e+06	1058925	4.11384e+06	7.90961e+06	4.9681e+06	1.50984e+07	1.71062e+07	7.49563e+06	5.25418e+06	5.77418e+06	3.40427e+06	4.79575e+06	-	-
Zahp003766	C26H28O16	[M+H]+	Quercetin 3-O-glucoside 7-O-xyloside	Flavonoids	Flavonols	-	286432	1.1082e+06	1.12053e+06	654548	649096	811536	1.97465e+06	435980	604757	784347	660754	1.11522e+06	-	-
Lmyp003873	C28H24O16	[M+H]+	Quercetin-3-O-(2''-O-galloyl)glucoside	Flavonoids	Flavonols	69624-79-9	602660	568251	243833	1.01497e+06	250745	88365	730840	861598	705905	483382	843494	628591	-	-
Lmdp004267	C30H26O14	[M+H]+	Quercetin-3-O-(6''-O-p-Coumaroyl)glucoside	Flavonoids	Flavonols	-	1.2256e+06	2.10229e+06	2.28024e+06	1.14566e+06	2.08134e+06	1.75551e+06	925173	1.96566e+06	915228	1.40677e+06	942106	852540	-	-
Lmdp002969	C21H20O13	[M+H]+	Myricetin-3-O-galactoside*	Flavonoids	Flavonols	15648-86-9	35035135	3.81037e+07	2.85791e+07	39535720	1.76911e+07	2.63523e+07	1.53004e+07	1.20672e+07	1.12749e+07	2.30092e+07	41176985	3.10819e+07	-	-
Lahp004580	C28H32O16	[M+H]+	rhamnazin-3-O-β-D-apiosyl-(1→2)-O-β-D-glucoside	Flavonoids	Flavonols	-	338766	855123	930654	285513	304937	507305	204425	352693	253871	270645	484283	482584	-	-
Lmjp002906	C22H22O12	[M+H]+	Rhamnetin-3-O-Glucoside	Flavonoids	Flavonols	27875-34-9	2.35691e+07	91772585	58452875	65860560	88407545	86872925	88259555	76608540	69002920	81630520	4.39757e+07	73535905	-	-
MWSHY0132	C21H20O11	[M+H]+	Quercetin-3-O-rhamnoside(Quercitrin)	Flavonoids	Flavonols	522-12-3	3.68153e+06	5.76765e+06	5.17679e+06	5.63702e+06	5.33601e+06	7.15296e+06	5.5384e+06	4.87721e+06	4.78932e+06	3.12589e+06	5.47292e+06	5.82634e+06	C01750	ko00944
Lmmp001947	C21H20O13	[M+H]+	Gossypetin-3-O-glucoside*	Flavonoids	Flavonols	-	1.37648e+07	3.23919e+07	3.38294e+07	19646455	1.87232e+07	34187045	1.40409e+07	1.11836e+07	1.8375e+07	1.81073e+07	34182855	2.61809e+07	-	-
Lmdp004892	C24H22O14	[M+H]+	Kaempferol-3-O-(6''-malonyl)galactoside*	Flavonoids	Flavonols	-	295310	457405	378840	532665	375500	275270	248555	557760	296980	313685	193470	186795	-	-
Lmdp003171	C22H22O11	[M+H]+	Azalein (Azaleatin-3-O-rhamnoside)	Flavonoids	Flavonols	29028-02-2	3.67626e+07	4.54322e+07	4.81796e+07	52806063	40609119	7.80694e+07	7.37923e+07	4.32785e+07	4.86808e+07	3.32709e+07	6.53102e+07	5.77115e+07	-	-
Lmmp002963	C28H32O16	[M+H]+	6-C-Methylquercetin-3-O-rutinoside	Flavonoids	Flavonols	-	2071630	220914	1808075	2.8101e+06	4183920	2.48884e+06	1.49764e+06	3.62564e+06	3.12153e+06	1.42842e+06	2846505	2.09226e+06	-	-
MWSHY0162	C27H30O17	[M+H]+	Quercetin-3-O-sophoroside (Baimaside)	Flavonoids	Flavonols	18609-17-1	202744	357666	109010	342898	469608	326503	211830	341308	263463	217802	274878	424559	C12667	ko00944,ko01110
mws0913	C21H20O11	[M-H]-	Kaempferol-3-O-galactoside (Trifolin)	Flavonoids	Flavonols	23627-87-4	2364475	1978655	5.9347e+06	4.6329e+06	1.52264e+06	2.32099e+06	4.67095e+06	1.77637e+06	4.55876e+06	1.91255e+06	2.01983e+06	3483775	C12626	ko00944,ko01110
Lmmp003817	C24H22O14	[M+H]+	Kaempferol-3-O-(6''-malonyl)glucoside*	Flavonoids	Flavonols	-	276940	387195	215165	216835	310345	312015	345425	281734	273600	479145	240205	313685	-	-
Smgp004575	C21H20O12	[M+H]+	Quercetin-5-O-β-D-glucoside*	Flavonoids	Flavonols	-	3.36411e+06	2.73108e+06	6.17079e+06	3.6445e+06	4.67482e+06	6.02325e+06	4.77456e+06	3.68809e+06	3.52593e+06	3.96332e+06	2.83094e+06	5.95841e+06	-	-
Hmjp003123	C21H18O13	[M+H]+	Quercetin-5-O-glucuronide	Flavonoids	Flavonols	-	7.73925e+06	52072280	1.07451e+07	1.23627e+07	1.34425e+07	1.07731e+07	36623890	1.14773e+07	21996595	28293010	13335780	18918741	-	-
Hmmp002121	C23H16O11	[M+H]+	Isorhamnetin-3-O-gallate	Flavonoids	Flavonols	-	1.75655e+06	738867	850968	6.22696e+06	4524090	2.93296e+06	6002260	9008005	7558850	5705420	2.96661e+06	3.14046e+06	-	-
Zblp004717	C28H32O16	[M+H]+	3'-methoxyquercetin-3-O-L-rhamnosyl(1→2)-glucopyranoside*	Flavonoids	Flavonols	-	2574740	198243	427578	1966825	2.87995e+06	2.04874e+06	1.46694e+06	1.83785e+06	2.11847e+06	1.31256e+06	3023430	1.86454e+06	-	-
Lmyp003500	C28H24O15	[M+H]+	Kaempferol-3-O-(2''-galloyl)galactoside*	Flavonoids	Flavonols	-	727118	1.19694e+06	845584	869764	891444	777535	844871	2300100	788355	660057	573215	1221890	-	-
Zmhp005139	C25H24O15	[M+H]+	Tamarixetin-3-O-(6''-malonyl)glucoside	Flavonoids	Flavonols	-	104457	81957.7	190577	96338.2	107416	292709	109500	78485.4	116720	69440.6	155279	88473.2	-	-
Lmqp004241	C28H22O16	[M+H]+	Kaempferol-3-O-(2''-O-galloyl)glucuronide	Flavonoids	Flavonols	-	97519.7	753736	333657	165460	65011.7	317710	175115	112253	194330	457405	265283	200191	-	-
Lmsp004166	C27H30O16	[M+H]+	Quercetin-3-O-glucoside-7-O-rhamnoside*	Flavonoids	Flavonols	-	1.30928e+06	522244	1.26788e+06	1.10295e+06	1.031e+06	937518	1.25449e+06	1.77408e+06	834637	913494	1.38164e+06	2227290	-	-
Lmjp002461	C27H30O16	[M+H]+	Quercetin-3-O-neohesperidoside*	Flavonoids	Flavonols	29662-79-1	1.30928e+06	522244	1.26788e+06	1.10295e+06	1.031e+06	937518	1.25449e+06	1.77408e+06	834637	913494	1.38164e+06	2227290	-	-
Hmcp001509	C33H40O21	[M+H]+	Isorhamnetin-3-O-(2''-O-xylosyl)glucoside-7-O-glucoside	Flavonoids	Flavonols	-	103628	95086.6	113229	123344	140846	138405	61783.5	220277	120055	76801.2	71863.5	156760	-	-
Lmgp003803	C29H34O17	[M+H]+	5,7,4'-Trihydroxy-6,8-dimethoxyisoflavone-7-O-galactoside-rhamnose	Flavonoids	Isoflavones	-	870253	2.61646e+06	2.25354e+06	2.1734e+06	1.12906e+06	2.14343e+06	1.73722e+06	1.73079e+06	2.14033e+06	1.82584e+06	1.7807e+06	1.80104e+06	-	-
Zmdp005767	C25H24O12	[M+H]+	Formononetin-7-O-(6''-Malonyl)glucoside	Flavonoids	Isoflavones	-	33893.8	26383.5	42208.1	46893	38817.3	54720.9	16538.7	55967.7	333677	77979.1	76084.7	76455.7	C16222	ko00943
pmp000548	C16H12O6	[M+H]+	Pratensein	Flavonoids	Isoflavones	2284-31-3	1.16726e+07	9.27457e+06	1.08473e+07	1.99912e+07	1.30485e+07	2.50347e+07	1.60793e+07	1.45953e+07	1.76709e+07	1.35535e+07	1.43589e+07	1.38904e+07	C10520	ko00943
Zbdp007825	C18H16O7	[M+H]+	5,4'-Dihydroxy-7,2',5'-trimethoxyisoflavone (Derrugenin)	Flavonoids	Isoflavones	73428-16-7	1.49691e+07	1.52789e+07	1.95563e+07	2.22169e+07	1.39405e+07	2.31416e+07	1.94989e+07	2.04694e+07	2.05469e+07	1.7619e+07	1.88415e+07	1.8318e+07	-	-
Lmmp002795	C22H22O11	[M+H]+	Pratensein-7-O-glucoside	Flavonoids	Isoflavones	36191-03-4	4.78586e+06	6.68046e+06	3.93992e+06	4.34345e+06	4.68338e+06	4.09852e+06	2.89964e+06	4.14027e+06	3.97055e+06	4.23323e+06	4.00678e+06	4.52312e+06	-	-
Lmdp003994	C23H24O10	[M+H]+	6,4'-Dimethoxyisoflavone-7-O-glucoside (Wistin)	Flavonoids	Isoflavones	19046-26-5	1.38405e+07	4.1546e+07	2.62313e+07	2.2541e+07	1.50104e+07	1.71226e+07	1.62011e+07	1.46847e+07	17581694	1.94467e+07	2.18668e+07	2.13408e+07	-	-
mws0895	C21H20O10	[M-H]-	Genistein-7-O-Glucoside (Genistin)	Flavonoids	Isoflavones	529-59-9	314386	522693	634393	332075	354993	386936	314276	316735	178181	409091	359787	389660	C09126	ko00943
Zbdp007159	C19H18O7	[M+H]+	5-Hydroxy-7,2',4',5'-tetramethoxyisoflavone; Robustigenin	Flavonoids	Isoflavones	-	3.1325e+06	5.53751e+06	5.21846e+06	3.331e+06	3.36338e+06	5.06114e+06	3.68866e+06	3.74609e+06	4.51006e+06	4.04651e+06	3.82874e+06	3.34115e+06	-	-
mws0894	C22H22O10	[M+H]+	Glycitin	Flavonoids	Isoflavones	40246-10-4	1.37299e+06	1.98784e+06	2.07588e+06	1.46959e+06	1.49033e+06	1.42456e+06	946327	961659	1.186e+06	1.40889e+06	1.30488e+06	1.11536e+06	C16195	ko00943
pme3233	C16H12O5	[M+H]+	Calycosin	Flavonoids	Isoflavones	20575-57-9	89643.4	176878	89195.6	97222.1	99845.7	125361	141122	126020	98678.8	95083.4	123839	103565	C01562	ko00943,ko01110
MWSHY0111	C22H22O10	[M+H]+	Calycosin-7-O-glucoside	Flavonoids	Isoflavones	20633-67-4	1.54123e+06	1.26487e+06	628614	1.68414e+06	1.5352e+06	996182	1.1324e+06	1.49497e+06	293640	1.63925e+06	1.28685e+06	1.25003e+06	-	-
Lmgp004731	C21H20O10	[M+H]+	Genistein-7-O-galactoside	Flavonoids	Isoflavones	-	5405720	3396710	1.5328e+06	2977480	7341225	4596350	4854720	6292750	4127305	5008235	2.11429e+06	4500015	-	-
Lajn004573	C23H28O11	[M-H]-	7,2',4'-Trihydroxy-8,3'-dimethoxyisoflavanglucoside	Flavonoids	Other Flavonoids	-	1.40312e+06	4.80301e+06	2.96931e+06	2.2451e+06	2.27765e+06	2.34415e+06	2.56502e+06	2.64582e+06	2.13184e+06	2.45558e+06	2.4637e+06	2.50377e+06	-	-
Zjhp090602	C16H14O5	[M+H]+	5,7-dihydroxy-3-(4'-hydroxybenzyl)-chroman-4-one(iso-2)	Flavonoids	Other Flavonoids	-	4.0787e+07	2.95538e+07	2.46118e+07	2.08121e+07	4.66493e+07	4.12956e+07	2.93807e+07	3.41956e+07	2.84277e+07	3.23949e+07	3.27069e+07	3.31133e+07	-	-
Laxp005049	C15H10O7	[M+H]+	Bracteatin	Flavonoids	Other Flavonoids	3260-50-2	6.1561e+06	6.72256e+06	5.12256e+06	7.75645e+06	7.54289e+06	8.83771e+06	7.96763e+06	8.60285e+06	7.42917e+06	7.2991e+06	7.02037e+06	7.28289e+06	C08577	-
Lamn006238	C23H26O11	[M-H]-	3,9-dihydroeucomnalin glucoside	Flavonoids	Other Flavonoids	-	6.52601e+06	1.15583e+07	7.51533e+06	9.79543e+06	7.28071e+06	1.23205e+07	8.01867e+06	9.51564e+06	8.75656e+06	8.4846e+06	8.39233e+06	8.78109e+06	-	-
pmp001012	C17H16O7	[M+H]+	6-Hydroxy-1,2,3,7-tetramethoxyxanthone	Flavonoids	Other Flavonoids	64756-87-2	1.3899e+06	1.12798e+06	1.75025e+06	941376	1.03224e+06	1.06582e+06	1.09222e+06	1.0297e+06	1.04451e+06	1.43409e+06	1.47711e+06	1.51918e+06	-	-
Hmgp002746	C18H16O7	[M+H]+	7,3'-Dihydroxy-5,4',5'-trimethoxyxanthone	Flavonoids	Other Flavonoids	-	4.42523e+06	5.79021e+06	5.996e+06	5.50505e+06	3.78885e+06	5.38007e+06	5.16368e+06	5.54473e+06	4.9131e+06	4.68499e+06	4.82248e+06	4.45656e+06	-	-
Wbtp006564	C16H12O7	[M+H]+	(2s)-4,8,10-trihydroxy-2-methoxy-1h,2h-furo[3,2-a]xanthen-11-one	Flavonoids	Other Flavonoids	-	3.36289e+06	6.27969e+06	2.7372e+06	7.04936e+06	1.17308e+07	9.53848e+06	1.07278e+07	7.23799e+06	9.11231e+06	6.44454e+06	7.02757e+06	6.84669e+06	-	-
Wbtp004961	C15H10O7	[M+H]+	1,2,4,5-tetrahydroxy-7-(hydroxymethyl)anthracene-9,10-dione*	Flavonoids	Other Flavonoids	-	6.10321e+06	6.74682e+06	4.5496e+06	6.51892e+06	7.33756e+06	8.09736e+06	8.75365e+06	9.22021e+06	7.2302e+06	7.23748e+06	6.75227e+06	7.67439e+06	-	-
Wbtp004352	C16H14O7	[M+H]+	1,3-dihydroxy-4,6,8-trimethoxyxanthen-9-one	Flavonoids	Other Flavonoids	-	3.32674e+07	2.17072e+07	1.48877e+07	3.49652e+07	3.0679e+07	3.75039e+07	3.39623e+07	4.54622e+07	3.83507e+07	2.79855e+07	3.28753e+07	3.31274e+07	-	-
Wbtp004753	C15H10O7	[M+H]+	1,2,3,7,8-pentahydroxy-6-methylanthracene-9,10-dione*	Flavonoids	Other Flavonoids	-	94264805	93976785	64442255	8.31993e+07	103465945	9.17102e+07	103738345	110228255	105859085	96251805	7.8672e+07	97318025	-	-
Ladp005389	C23H24O10	[M+H]+	portulacanone D glucoside	Flavonoids	Other Flavonoids	-	1.1954e+07	2.63841e+07	2.14119e+07	1.30541e+07	9.43695e+06	1.29427e+07	1.0395e+07	1.233e+07	1.362e+07	1.33704e+07	1.5394e+07	1.19937e+07	-	-
Lahp004470	C22H18O10	[M+H]+	(-)-(2R)-5,7,3',4',5'-entahydroxyflavan-7-gallate	Flavonoids	Other Flavonoids	-	1.56348e+06	1.40759e+06	966407	900186	1.3868e+06	953226	1.08846e+06	1.23954e+06	1.03081e+06	1.04424e+06	1.14037e+06	1.33686e+06	-	-
Lahp003659	C21H24O11	[M+H]+	(-)-(2S)-5,7,3',4',5'-pentahydroxyflavan glucoside	Flavonoids	Other Flavonoids	-	2916230	2073320	1.76913e+06	2.02712e+06	4.81768e+06	3.70897e+06	2.45833e+06	1.1663e+06	2.54833e+06	2.00948e+06	2.59538e+06	2.42757e+06	-	-
Wbtp004798	C16H12O6	[M+H]+	8,11-dimethoxy-2h-[1,3]dioxolo[4,5-b]xanthen-10-one	Flavonoids	Other Flavonoids	-	5.10583e+06	6.78009e+06	6.68958e+06	4.8631e+06	4.64315e+06	5.00747e+06	4.98268e+06	4.50725e+06	5.15437e+06	4.44068e+06	5.73569e+06	4.75295e+06	-	-
Lamn006359	C22H24O10	[M-H]-	4'-demethyl-3,9-dihydroeucomin glucoside	Flavonoids	Other Flavonoids	-	3.44588e+07	2.37943e+07	43457700	1.56211e+07	2.11823e+07	3.55058e+07	1.60949e+07	1.83195e+07	1.59803e+07	1.90898e+07	2.19529e+07	1.63289e+07	-	-
Lamp011572	C18H14O7	[M+H]+	2-Hydroxy-7-O-methylscillascillin	Flavonoids	Other Flavonoids	52096-50-1	142494	87811.1	49773.4	172514	212267	265580	176435	120794	112187	111691	154709	161283	-	-
Wbtn004165	C26H32O7	[M-H]-	1,6-dihydroxy-3,7-dimethoxy-8-(3-methoxy-3-methylbutyl)-2-(3-methylbut-2-en-1-yl)xanthen-9-one	Flavonoids	Other Flavonoids	-	533781	1.7779e+06	1.40821e+06	792654	402317	1.01305e+06	658323	526818	815318	933263	830144	1.24189e+06	-	-
Zbdp002220	C14H20O9	[M+H]+	2,6-Dimethoxypydroquinone-1-O-glucoside	Flavonoids	Other Flavonoids	-	1.84766e+06	1.0697e+06	1.12284e+06	1.6712e+06	2.14478e+06	2.43092e+06	2.27509e+06	2.08137e+06	1.8861e+06	1.48999e+06	1.28936e+06	1.95717e+06	-	-
Lamp006064	C29H34O16	[M+H]+	3-[(3,4-dihydroxyphenyl)methylidene]-5,7-dihydroxy-6-methoxy-2h-1-benzopyran-4-one glucosyl rhamnoside	Flavonoids	Other Flavonoids	-	1.56882e+06	14781815	7.77217e+06	1.27758e+06	2895820	3928460	2310260	4821970	1438905	6433850	3.3302e+06	5148095	-	-
Ladp004020	C22H22O12	[M+H]+	tenuiflorin C glucoside	Flavonoids	Other Flavonoids	-	2.22451e+07	3841125	55456100	3.87394e+07	3497435	86861405	4027850	73025620	3316515	82203630	4.16426e+07	68178285	-	-
Hmgn002254	C17H14O8	[M-H]-	5,7,3'-Trihydroxy-4,6,5'-trimethoxyxanthone	Flavonoids	Other Flavonoids	-	39812.7	52475.9	80835.6	132262	58350	142202	168521	149989	176446	70814.5	152197	117822	-	-
Zbdp005176	C16H12O7	[M+H]+	Scandione	Flavonoids	Other Flavonoids	-	1452375	511220	577840	371068	1.42095e+06	748635	1642760	1728770	2007385	760365	1262240	619685	-	-
HX1341	C9H6O3	[M+H]+	7-hydroxy-2H-1-benzopyran-2-one	Lignans and Coumarins	Coumarins	-	8.90612e+06	1.1904e+07	8.7186e+06	1.22386e+07	1.01844e+07	8.30289e+06	1.10018e+07	1.57534e+07	1.3601e+07	1.04448e+07	1.05466e+07	1.04227e+07	-	-
HX1366	C9H6O2	[M+H]+	coumarin	Lignans and Coumarins	Coumarins	-	1.975e+07	13010821	1.14846e+07	4.01611e+07	2.80474e+07	2.84713e+07	2.92792e+07	3.51324e+07	3.67012e+07	2.686e+07	2.69325e+07	2.65309e+07	-	-
Zmpn002553	C15H16O9	[M-H]-	Cichoriin*	Lignans and Coumarins	Coumarins	531-58-8	1.89601e+06	1.11399e+06	2.00245e+06	6.24475e+06	4.77615e+06	5.61712e+06	6.91148e+06	3.78613e+06	4.17965e+06	3.94891e+06	3.89107e+06	3.87556e+06	C09206	-
Lmjp101402	C9H6O4	[M-H]-	5,7-Dihydroxycoumarin	Lignans and Coumarins	Coumarins	2732-18-5	76186.6	157662	156323	250773	89346	69584.3	234049	277603	246424	220144	216771	223925	-	-
Lmbp002962	C10H8O5	[M+H]+	Isofraxetin	Lignans and Coumarins	Coumarins	50656-75-2	7.99403e+06	3808605	7.86198e+06	1.26075e+07	1.34292e+07	1.50598e+07	5.95099e+06	8.78091e+06	5.23513e+06	8.1051e+06	8.06265e+06	7.81627e+06	-	-
Cmyn001328	C15H16O9	[M-H]-	Daphnin*	Lignans and Coumarins	Coumarins	486-55-5	1.81705e+06	1.05788e+06	2.12077e+06	6.0802e+06	4.33905e+06	5.78862e+06	6.76861e+06	3.46259e+06	4.77355e+06	3.71284e+06	3.70085e+06	3.85297e+06	C01421	-
mws1013	C9H6O4	[M-H]-	Esculetin (6,7-Dihydroxycoumarin)	Lignans and Coumarins	Coumarins	305-01-1	165961	197203	173531	251400	86700	249720	182622	209241	201873	189420	188405	196341	C09263	ko00999,ko01110
pmn001571	C18H18O5	[M-H]-	Agrimonolide	Lignans and Coumarins	Coumarins	21499-24-1	6.45564e+06	4.52176e+06	3.89973e+06	1.14215e+07	6.63058e+06	1.49321e+07	8.16394e+06	8.53341e+06	9.15641e+06	8.13899e+06	8.26193e+06	7.84682e+06	-	-
Lmbp102601	C9H6O3	[M+H]+	7-Hydroxycoumarin;Umbelliferone	Lignans and Coumarins	Coumarins	93-35-6	7.87232e+06	1.05358e+07	7.61577e+06	1.21093e+07	1.00167e+07	7.16544e+06	1.03412e+07	1.32707e+07	1.26329e+07	9.96537e+06	1.04885e+07	9.82013e+06	C09315	ko00999,ko01110
Lahp004442	C15H12O5	[M+H]+	3,4-Dihydro-4-(4'-hydroxyphenyl)-5,7-dihydroxycoumarin	Lignans and Coumarins	Coumarins	-	676081	717941	775322	1.31955e+06	2.10789e+06	1.69082e+06	1.30288e+06	898555	892614	1.16619e+06	1.07158e+06	1.10835e+06	-	-
MWSmce061	C12H12O5	[M+H]+	Dimethylfraxetin; 6,7,8-Trimethoxycoumarin*	Lignans and Coumarins	Coumarins	6035-49-0	350054	86555.6	180276	295459	469902	235362	687536	948969	416457	391465	360538	363853	-	-
Yalp002838	C11H10O4	[M+H]+	4-Methoxy-5-(hydroxymethyl)-2H-1-benzopyran-2-one	Lignans and Coumarins	Coumarins	-	9.13484e+06	9665810	5.0834e+06	8.29157e+06	4.78914e+06	4.22076e+06	6.12018e+06	7.08407e+06	7.71577e+06	5.71567e+06	5.39866e+06	5.92616e+06	-	-
Cmpp003619	C10H8O4	[M+H]+	6,7-Dihydroxy-4-methylcoumarin	Lignans and Coumarins	Coumarins	529-84-0	1.29628e+06	474890	485669	971024	1.56037e+06	1.24625e+06	1.19189e+06	1.3605e+06	1.11658e+06	1.14715e+06	1.07256e+06	1.02543e+06	-	-
pmb1207	C19H14O6	[M+H]+	O-Feruloyl 3-hydroxycoumarin	Lignans and Coumarins	Coumarins	-	303180	195861	354918	342495	342824	75025	332552	421241	151750	314662	317537	351598	-	-
HX1360	C10H8O3	[M+H]+	7-methoxycoumarin	Lignans and Coumarins	Coumarins	-	1.14869e+06	1.10552e+06	1.77752e+06	9.9108e+06	5.64296e+06	8.96208e+06	6.42751e+06	6.25179e+06	7.90125e+06	5.55139e+06	5.24969e+06	4.87921e+06	-	-
Lmsp002548	C16H18O9	[M+H]+	Isoscopoletin-β-D-glucoside	Lignans and Coumarins	Coumarins	20186-29-2	4.48554e+06	6.0511e+06	5.71987e+06	7.51766e+06	8.29294e+06	4.84601e+06	5.50086e+06	1.03344e+07	8.18712e+06	6.57065e+06	6.94377e+06	6.0921e+06	-	-
Lmbn001162	C15H16O9	[M-H]-	Esculetin-7-O-glucoside*	Lignans and Coumarins	Coumarins	-	1.66592e+06	992766	1.89459e+06	5.88895e+06	4.355e+06	5.18944e+06	5.9608e+06	3.65768e+06	4.90113e+06	3.76036e+06	3.35357e+06	3.80597e+06	-	-
Zmxp004471	C15H10O6	[M+H]+	Thunberginol B	Lignans and Coumarins	Coumarins	147666-81-7	2.69796e+06	3.76045e+06	2.30613e+06	3.69038e+06	3.83604e+06	4.23006e+06	4.09156e+06	3.78253e+06	3.58122e+06	2.94834e+06	3.09979e+06	3.42203e+06	-	-
Wcdp001713	C15H16O9	[M+H]+	Daphnetin-8-Glucoside	Lignans and Coumarins	Coumarins	20853-56-9	965627	432049	365674	523345	1.43514e+06	861903	526703	839975	301469	580063	663015	671892	-	-
Lmhn003439	C17H20O9	[M-H]-	Phellodenol H	Lignans and Coumarins	Coumarins	917092-48-9	1916145	1.01715e+06	738048	1.27228e+06	666634	978865	1.13715e+06	1.78568e+06	1.56434e+06	1.15439e+06	998632	1.16972e+06	-	-
Zbsp004940	C10H8O4	[M+H]+	6-Hydroxy-7-methoxycoumarin*	Lignans and Coumarins	Coumarins	-	3.67429e+06	2.2678e+06	2.21803e+06	2.3662e+06	2.41463e+06	2945150	2.02159e+06	2.26577e+06	1.87457e+06	2.30865e+06	1.88712e+06	2.03004e+06	-	-
Hmlp006964	C12H12O5	[M+H]+	5,6,7-Trimethoxycoumarin*	Lignans and Coumarins	Coumarins	55085-47-7	319488	71473.8	218735	277404	461452	201925	699940	989295	444345	415803	346997	351742	-	-
mws1074	C9H6O4	[M-H]-	Daphnetin	Lignans and Coumarins	Coumarins	486-35-1	641384	404326	231366	608245	418282	373748	621469	548325	595524	541711	470944	583733	C03093	-
Zmcp001750	C17H20O10	[M+H]+	Eleutheroside B1	Lignans and Coumarins	Coumarins	16845-16-2	1.95653e+06	1.86457e+06	1772698	2.47848e+06	1.95579e+06	1.84973e+06	1.75041e+06	2.10863e+06	2.06761e+06	1.69259e+06	2.09026e+06	1.79708e+06	-	-
mad1424	C17H14O13	[M+H]+	Ditartaroyl-hydroxycoumarin	Lignans and Coumarins	Coumarins	-	1.68891e+06	2.98768e+06	2.10455e+06	1.7175e+06	2.07844e+06	2.28433e+06	1.58037e+06	1.59811e+06	1.92306e+06	1.71906e+06	1.38404e+06	1.46106e+06	-	-
Wmln000659	C10H10O4	[M-H]-	3-Methyl-4,8-dihydroxy-3,4-dihydroisocoumarin	Lignans and Coumarins	Coumarins	33788-22-6	278967	114077	83059.6	119423	192522	125643	146500	112287	95542.6	125743	122340	98427.8	-	-
Lmbp003825	C15H16O8	[M+H]+	Skimmin (7-Hydroxycoumarin-7-O-glucoside)	Lignans and Coumarins	Coumarins	93-39-0	499795	600228	313292	1.132e+06	821829	953624	834462	854228	1.07374e+06	631704	766864	821424	-	-
Qmzp101807	C20H22O5	[M+H]+	Avicennol	Lignans and Coumarins	Coumarins	56110-68-0	1.02494e+06	704117	834337	947177	958769	782918	1.02897e+06	890499	660865	874453	691301	657329	-	-
mws1639	C11H10O5	[M+H]+	Isofraxidin	Lignans and Coumarins	Coumarins	486-21-5	68355	130065	56685	209389	198508	216578	148118	122089	156148	185119	130376	163677	C17480	-
MWSCX014	C10H8O4	[M+H]+	Scopoletin (7-Hydroxy-6-methoxycoumarin)*	Lignans and Coumarins	Coumarins	92-61-5	726615	1.79729e+06	1094190	1.06957e+06	1.1493e+06	927119	709636	1.03092e+06	961454	1.21628e+06	903333	895551	C01752	ko00999,ko01110
Lmjp002764	C11H10O5	[M+H]+	Umckalin (7-hydroxy-5,6-dimethoxycoumarin)	Lignans and Coumarins	Coumarins	43053-62-9	296070	186795	522006	318732	456910	426911	398957	373853	275372	403910	311005	281596	-	-
MWSHC20172	C10H8O4	[M+H]+	Isoscopoletin (6-Hydroxy-7-Methoxycoumarin)	Lignans and Coumarins	Coumarins	776-86-3	232761	108463	88967	629725	1102590	1258880	607536	524300	2569650	581925	825725	835785	C18079	ko00999
pmb0382	C19H14O6	[M+H]+	O-Feruloyl 4-hydroxycoumarin	Lignans and Coumarins	Coumarins	-	2.3617e+06	840428	1.16042e+06	619116	1042135	738580	1.71445e+06	1.48415e+06	484160	1.02958e+06	1.52156e+06	1.38084e+06	-	-
Lmbn001181	C22H28O15	[M-H]-	Fraxetin-7,8-di-O-glucoside	Lignans and Coumarins	Coumarins	-	2.04667e+06	1.56358e+06	1.95413e+06	1.98995e+06	1.83013e+06	1.93222e+06	1.04868e+06	1.1362e+06	787734	1.43097e+06	1.20689e+06	945049	-	-
mws1076	C11H10O4	[M+H]+	Scoparone	Lignans and Coumarins	Coumarins	120-08-1	4.72138e+06	6.55546e+06	3.78797e+06	6.5968e+06	2.95331e+06	5.71437e+06	5.92209e+06	6.55233e+06	5.49515e+06	4.28778e+06	4.2157e+06	5.97698e+06	C09311	ko00999
mws1014	C10H8O5	[M+H]+	Fraxetin (7,8-Dihydroxy-6-methoxycoumarin)	Lignans and Coumarins	Coumarins	574-84-5	1.07084e+06	1.89114e+06	1.23494e+06	2.0638e+06	1.25858e+06	891780	1.48886e+06	1.22097e+06	1.5453e+06	1.72065e+06	1.12065e+06	1.41917e+06	C09265	ko00999,ko01110
Lmjn102210	C23H26O10	[M-H]-	Desmethylagrimonolide-6-O-β-D-glucopyranoside*	Lignans and Coumarins	Coumarins	-	3.80199e+06	5.22004e+06	1.94234e+06	3.3022e+06	2.66039e+06	2.99568e+06	2.58302e+06	2.61332e+06	2.76339e+06	2.19685e+06	2.13645e+06	3.43694e+06	-	-
Lajp009584	C16H16O6	[M+H]+	5-Methoxypanial	Lignans and Coumarins	Coumarins	-	243810	83140.1	118241	212993	220003	232518	221044	40082.8	157081	180937	310907	185743	-	-
Hmbp002498	C21H26O13	[M+H]+	Scopoletin-7-O-xylosyl(1→6)glucoside	Lignans and Coumarins	Coumarins	-	57455.6	42503.6	61639.7	43345	84270.3	85129.1	78239.8	55458.5	60067.5	65256.2	85118.1	39803.4	-	-
Lmbp002255	C16H18O10	[M+H]+	Fraxetin-8-O-glucoside (Fraxin)	Lignans and Coumarins	Coumarins	524-30-1	414709	577815	738431	411483	1.14492e+06	378695	447713	281589	365387	460690	800580	422756	C09266	-
MWSmce024	C16H18O9	[M+H]+	Scopoletin-7-O-glucoside (Scopolin)	Lignans and Coumarins	Coumarins	531-44-2	1.49517e+06	842098	688923	2.29684e+06	2.72023e+06	1.83001e+06	4.00154e+06	3.10905e+06	1.94165e+06	1.25392e+06	2.96364e+06	1.86951e+06	C01527	ko00999,ko01110
Hmlp004943	C28H32O16	[M+H]+	Nitensoside B	Lignans and Coumarins	Coumarins	-	1390090	783825	325375	3094945	1.70722e+06	3048970	1.75803e+06	3367700	2476350	1.22828e+06	1.6337e+06	2955360	-	-
Wagp010621	C23H20O8	[M+H]+	5-Methoxyjusticidin A	Lignans and Coumarins	Lignans	-	4.08013e+06	5.0828e+06	3.93629e+06	2.36567e+06	2.94445e+06	2.07964e+06	3.47894e+06	4.56735e+06	4.12215e+06	3.2092e+06	3.25234e+06	3.23093e+06	-	-
Wbwp009458	C20H22O6	[M+H]+	(+)-Dehydrodiconiferyl alcohol	Lignans and Coumarins	Lignans	-	644339	535492	571759	1.07393e+06	657894	1.22047e+06	861486	1.09778e+06	845491	758069	770501	775140	-	-
Wbwp008548	C20H20O7	[M+H]+	[(1R,2S)-1-(1,3-benzodioxol-5-yl)-2-methyl-3-oxobutyl]4-hydroxy-3-methoxybenzoate	Lignans and Coumarins	Lignans	-	9.51571e+06	9.64455e+06	8.98896e+06	9.42737e+06	9.39281e+06	9.02378e+06	9.5922e+06	9.43285e+06	8.88008e+06	9.17757e+06	9.42956e+06	9.18681e+06	-	-
Lskp211249	C22H26O6	[M+H]+	epieudesmin	Lignans and Coumarins	Lignans	-	3.50357e+06	1.61582e+06	2.52448e+06	3.47572e+06	3.59051e+06	3.12836e+06	3.71429e+06	3.41709e+06	3.70048e+06	3.01068e+06	3.07854e+06	2.98511e+06	-	-
Wagp008813	C22H22O9	[M+H]+	5a-methoxy-9-(3,4,5-trimethoxyphenyl)-5a,6,8a,9-tetrahydro-8H-[1,3]dioxolo[4,5-g]furo[3,4-b]chromen-8-one	Lignans and Coumarins	Lignans	-	95716.8	98506.3	443880	748624	442066	970807	549072	736353	417517	484813	505146	503507	-	-
Cmsn002067	C25H32O10	[M-H]-	7S,8R-threo-3',9,9'-trihydroxy-3-methoxy-4',7-epoxy-neolignan-4-O-rhamnoside	Lignans and Coumarins	Lignans	-	2.15824e+07	5.41636e+07	4.7202e+07	3.65877e+07	2.96174e+07	3.418e+07	85471645	2.18174e+07	1.87639e+07	3.24857e+07	3.23785e+07	3.38646e+07	-	-
mws0097	C20H22O6	[M-H]-	Pinoresinol	Lignans and Coumarins	Lignans	487-36-5	52551	28103.4	94683.1	75339	76371.2	63271	91258	84303.3	77540.1	70536.1	71537.3	68083	C05366	ko00999,ko01100,ko01110
Smjp004295	C28H28O13	[M+H]+	Justicidinoside B*	Lignans and Coumarins	Lignans	-	4.44761e+06	4.71192e+06	3.70393e+06	3.46333e+06	4.04065e+06	5.38182e+06	4.92915e+06	5.08712e+06	5.06213e+06	4.20602e+06	4.4352e+06	4.40795e+06	-	-
MWS20152	C22H26O8	[M-H]-	Syringaresinol	Lignans and Coumarins	Lignans	21453-71-4	69676.6	25433.8	59485.6	24891.6	88420.3	69545.3	75252.6	69909.7	66046.9	62305.9	63696.4	59862.8	C10889	-
Cmsn002480	C26H36O11	[M-H]-	Secoisolariciresinol-9'-O-glucoside	Lignans and Coumarins	Lignans	63320-67-2	1.32762e+06	857783	913894	1.23772e+06	1.39246e+06	1.45254e+06	1.33889e+06	1.39372e+06	1.59531e+06	1.20281e+06	1.21632e+06	1.28484e+06	-	-
Hahn002315	C28H36O13	[M-H]-	syringaresinol-4-O-β-D-glucopyranoside	Lignans and Coumarins	Lignans	-	178165	93171.9	180204	743610	324556	163383	243377	160669	148312	177885	176780	188597	-	-
Wagp011199	C23H20O9	[M+H]+	5-Methoxydehydropodophyllotoxin	Lignans and Coumarins	Lignans	151703-06-9	240127	272556	388433	300292	307311	455228	326761	259023	262776	272362	288487	269541	-	-
HX1373	C20H24O7	[M+H]+	threo-guaiacylglycerol-β-coniferyl ether(ISO1)	Lignans and Coumarins	Lignans	-	168180	51359.5	442206	280512	281583	180580	271385	304404	434836	263257	243686	252185	-	-
Wagp011465	C21H16O7	[M+H]+	Diphyllin	Lignans and Coumarins	Lignans	22055-22-7	592783	544611	531791	1.04e+06	606105	1.0195e+06	747794	926358	761764	639935	651015	690921	C10559	-
HJN083	C26H34O11	[M-H]-	Lariciresinol-4'-O-glucoside	Lignans and Coumarins	Lignans	143663-00-7	778217	292919	936930	674323	360674	692397	521076	476311	602817	678260	624157	653667	-	-
Lazn006735	C31H36O11	[M-H]-	Erythro-Guaiacylglycerol-β-O-4'-dehydrodisinapyl Ether	Lignans and Coumarins	Lignans	613684-55-2	257591	61506.5	151044	202234	362096	85741	179906	281381	206849	174573	183628	168874	-	-
Wbmn002185	C20H14O7	[M-H]-	6-Hydroxy-4-(4-hydroxy-3-methoxyphenyl)-7-methoxy-naphtho[2,3-c]furan-1,3-dione-1(ISO-1)	Lignans and Coumarins	Lignans	-	691574	1.81732e+06	1.53947e+06	1.7166e+06	683915	1.05445e+06	1.00016e+06	1.09755e+06	1.36576e+06	1.05432e+06	978036	1.06731e+06	-	-
Lmsp004450	C20H22O6	[M+H]+	Dehydrodiconiferyl alcohol	Lignans and Coumarins	Lignans	4263-87-0	225570	72565.3	71690	196407	133568	221582	221267	286360	203368	199615	206284	220276	-	-
Cmsn001914	C25H34O12	[M-H]-	7R,8S-erythro-3',4,9,9'-tetrahydroxy-3-methoxy-8-O-4'-neolignan-7-O-glucopyr-anoside,	Lignans and Coumarins	Lignans	-	2.10184e+06	3.05771e+06	3.56415e+06	2.76975e+06	3.45274e+06	2.76743e+06	3.00624e+06	2.52281e+06	2.51034e+06	2.57643e+06	2.82534e+06	2.80863e+06	-	-
Wbmn003411	C20H18O7	[M-H]-	9-hydroxysesamin	Lignans and Coumarins	Lignans	-	1.04228e+07	3.23305e+06	1.21949e+07	1.36912e+07	1.81512e+07	1.71784e+07	8.37713e+06	1.19361e+07	6.23134e+06	1.127e+07	1.23543e+07	1.13652e+07	-	-
Lazn006001	C31H38O11	[M-H]-	Dihydrobuddlenol B	Lignans and Coumarins	Lignans	-	1.22908e+06	421675	615334	1.01323e+06	1.44922e+06	725962	1.12273e+06	1.39717e+06	1.2406e+06	1.09335e+06	998191	1.00155e+06	-	-
Lmmn003041	C25H32O10	[M-H]-	Isolariciresinol-9'-O-xyloside	Lignans and Coumarins	Lignans	97055-97-5	3.07349e+06	2.0275e+06	2.9496e+06	2.80597e+06	4.6429e+06	2.83189e+06	2.84554e+06	3.26513e+06	3.36767e+06	2.51565e+06	2.78821e+06	2.72175e+06	-	-
Lmhn008558	C22H28O7	[M-H]-	Kadangustin I	Lignans and Coumarins	Lignans	-	886977	1.22864e+06	1.22109e+06	1.08004e+06	791195	1.23908e+06	1.01723e+06	1.28888e+06	1.18034e+06	984447	1.09732e+06	1.06228e+06	-	-
pmn001375	C26H32O12	[M-H]-	1-Hydroxypinoresinol-1-O-Glucoside	Lignans and Coumarins	Lignans	81495-71-8	203864	207088	148649	141535	128658	122966	105334	130995	161697	151821	136290	152595	-	-
Smjp004159	C28H28O13	[M+H]+	Justicidinoside A*	Lignans and Coumarins	Lignans	-	4.35902e+06	4.86394e+06	3.45539e+06	3.66442e+06	4.07848e+06	5.00542e+06	4.9878e+06	5.12442e+06	4.84328e+06	4.14439e+06	4.25086e+06	4.7e+06	-	-
WaYn006734	C42H50O16	[M-H]-	Hedyotisol A*	Lignans and Coumarins	Lignans	95732-59-5	226887	61190.5	143009	159310	269068	183880	159393	123599	126404	120381	136749	136482	-	-
Lcyn000106	C26H32O13	[M-H]-	Dichotomoside A	Lignans and Coumarins	Lignans	-	281876	219942	260340	181022	181058	173324	138099	172257	178333	192075	220143	197863	-	-
WaYn006941	C42H50O16	[M-H]-	Hedyotisol B*	Lignans and Coumarins	Lignans	95839-45-5	456942	151671	284463	263714	592446	292866	318113	375755	238794	323824	300359	277574	-	-
Lmyn003971	C26H34O11	[M-H]-	Dihydrodehydrodiconiferyl alcohol-4-O-glucoside	Lignans and Coumarins	Lignans	-	2.61604e+06	2.63552e+06	2.44791e+06	2.78747e+06	2.48678e+06	2.82145e+06	3.39328e+06	2.9783e+06	3.11281e+06	3.0865e+06	2.81295e+06	2.63273e+06	-	-
HX1372	C20H24O7	[M+H]+	guaiacylglycerol-β-coniferyl ether	Lignans and Coumarins	Lignans	-	1.29856e+06	366788	787312	830519	1.00446e+06	774147	850734	669056	604826	709136	699699	814363	-	-
WaYn002469	C20H26O9	[M-H]-	4',8''-Bisguaiacylglycerol	Lignans and Coumarins	Lignans	-	256917	436522	717529	322846	241804	298959	250068	201819	240224	304513	292474	344321	-	-
Lazp005033	C20H24O5	[M+H]+	Divanillyltetrahydrofuran	Lignans and Coumarins	Lignans	-	473233	632058	577605	485818	511835	355192	429448	505968	427880	435731	517107	450787	-	-
pmn001376	C20H24O7	[M-H]-	Olivil	Lignans and Coumarins	Lignans	2955-23-9	21675	10005	17000.9	26675	21675	35010	24404.1	45010	29949.4	21287.9	17616.9	20005	-	-
Wbwn004958	C25H32O10	[M-H]-	Schizandriside	Lignans and Coumarins	Lignans	71222-06-5	3.25938e+06	2.12406e+06	3.528e+06	3.51906e+06	4.03805e+06	3.04798e+06	3.52812e+06	4.20142e+06	3.43592e+06	3.32347e+06	3.68696e+06	3.02427e+06	-	-
Cmsn002383	C25H34O11	[M-H]-	(7S,8S-Threo-3',4,7,9-tetrahydroxy-3-methoxy-8-O-4'-neolignan-9'-O-rhamnoside	Lignans and Coumarins	Lignans	-	1.88212e+07	1.12959e+07	1.56222e+07	2.35179e+07	1.6948e+07	1.82117e+07	2.03709e+07	2.19343e+07	2.572e+07	1.69208e+07	1.56925e+07	1.92967e+07	-	-
Wbmp004602	C19H18O6	[M+H]+	1,2-Dihydro-7-hydroxy-1-(4-hydroxy-3-methoxyphenyl)-3-(hydroxymethyl)-6-methoxy-(1S,2R)-2-naphthalenecarboxaldehyde	Lignans and Coumarins	Lignans	-	169534	87622.7	109639	105593	138104	122693	143847	65583.4	91881.3	96539.1	116492	117374	-	-
Lasp006411	C20H18O8	[M+H]+	5'-Demethylaquillochin	Lignans and Coumarins	Lignans	305364-91-4	507255	159020	359451	277374	331491	258748	371179	363749	322849	289571	233692	252262	-	-
Lmmn002260	C27H36O12	[M-H]-	5'-Methoxyisolariciresinol-9'-O-glucoside	Lignans and Coumarins	Lignans	-	190511	118915	158641	206730	142614	185084	187357	191602	195404	149368	178656	184702	-	-
HX1371	C20H24O6	[M+H]+	(7S,8R)-dihydrodehydrodiconferyl alcohol	Lignans and Coumarins	Lignans	-	301712	154865	217245	246318	258855	292885	331447	326056	249590	244105	194646	214800	-	-
Lhzp102808	C20H18O6	[M+H]+	Sesamin	Lignans and Coumarins	Lignans	607-80-7	5.86817e+06	6.44475e+06	3.97801e+06	5.09664e+06	6.92421e+06	3.83652e+06	5.88859e+06	8.00698e+06	1.23112e+07	5.91667e+06	5.37046e+06	6.85104e+06	C10882	-
Lcgp000245	C25H32O10	[M+H]+	dihydrodehydrodiconiferyl alcohol-9-O-β-D-xylopyranoside	Lignans and Coumarins	Lignans	-	801537	3.84645e+06	3.04173e+06	1.22897e+06	984009	1.61195e+06	1.41531e+06	1.10128e+06	1.26498e+06	1.87525e+06	1.40516e+06	1.50657e+06	-	-
pmn001378	C26H32O11	[M-H]-	Pinoresinol-4-O-glucoside	Lignans and Coumarins	Lignans	41607-20-9	186967	333344	295496	253601	243782	345778	274485	160975	175690	303077	239424	341077	C17529	-
MWSHC2047	C28H36O13	[M-H]-	Syringaresinol-4'-O-glucoside; Acanthoside B	Lignans and Coumarins	Lignans	7374-79-0	321541	164405	244023	254061	183305	333862	247566	167423	172884	241761	165565	245215	C10890	-
Wbmn00859	C20H16O8	[M-H]-	vitelignin A	Lignans and Coumarins	Lignans	-	1.74053e+06	889804	385469	539026	937910	787921	2.14962e+06	627206	524758	390062	606511	602524	-	-
Lmtn003096	C26H36O11	[M-H]-	Secoisolariciresinol 4-O-glucoside	Lignans and Coumarins	Lignans	-	1.52677e+06	982284	1.64233e+06	1.72525e+06	1.30107e+06	1.60293e+06	4990980	2.16855e+06	2.45032e+06	1.54255e+06	2.10889e+06	1.3395e+06	-	-
Lskp211385	C20H20O6	[M+H]+	(-)-dihydrosesamin	Lignans and Coumarins	Lignans	-	113976	42955.2	90990.7	27255.7	138801	78861.3	116793	82371.8	70534.2	180463	109572	141350	-	-
mws1392	C7H6O3	[M+H]+	Sesamol	Lignans and Coumarins	Lignans	533-31-3	142309	106045	209483	139988	184069	164620	163016	145440	99625	101064	177161	156054	C10832	-
Jmzn003343	C26H34O11	[M-H]-	Saikolignanoside A	Lignans and Coumarins	Lignans	-	2.34278e+06	960564	1.56806e+06	1.21256e+06	1.16691e+06	2.17954e+06	3040455	1.15186e+06	2.01533e+06	1.23273e+06	1.2831e+06	2.02322e+06	-	-
Lssp210086	C20H20O7	[M+H]+	Balanophonin B	Lignans and Coumarins	Lignans	92216-41-6	180120	146577	200145	191009	202126	150231	202185	249585	198921	176248	337070	161509	-	-
Zmjn004133	C18H32O4	[M-H]-	9S-Hydroperoxy-10E,12Z-octadecadienoic acid	Lipids	Free fatty acids	5502-91-0	148836	172251	153399	160385	135540	150824	158623	156515	163696	157318	157066	157177	C14827	ko00591,ko01100
Lmbn005369	C18H32O3	[M-H]-	13(S)-HODE;13(S)-Hydroxyoctadeca-9Z,11E-dienoic acid*	Lipids	Free fatty acids	10219-69-9	151041	104541	96707.5	147053	143538	152243	231123	243652	328479	159458	160519	161478	C14762	ko00591
Zmgn005057	C18H34O3	[M-H]-	9,10-Epoxyoctadecanoic Acid	Lipids	Free fatty acids	2443-39-2	6.33848e+06	6.53022e+06	5.70883e+06	7.31304e+06	5.64082e+06	7.73293e+06	5.61471e+06	8.78141e+06	7.00855e+06	6873984	6.89969e+06	6.98087e+06	C19418	ko00073
MWSslk133	C14H26O4	[M-H]-	1,14-Tetradecanedioic Acid	Lipids	Free fatty acids	821-38-5	373319	427379	389023	352123	367215	309807	376133	384120	403169	372773	372596	366603	-	-
MWS5235	C18H36O3	[M-H]-	12-Hydroxyoctadecanoic acid	Lipids	Free fatty acids	106-14-9	165108	167428	169826	171216	165207	175741	172287	177382	175734	170138	166883	166513	-	-
MW0017099	C18H28O3	[M-H]-	9s,13r-12-Oxophytodienoic Acid	Lipids	Free fatty acids	71606-07-0	603389	480443	195488	751522	500236	580141	936683	1.13074e+06	2.37293e+06	775605	766470	756882	-	-
mws0359	C15H30O2	[M-H]-	Pentadecanoic Acid	Lipids	Free fatty acids	1002-84-2	463237	439990	471710	398705	440445	411599	377233	461149	456631	426827	429234	417684	C16537	-
pmf0293	C18H38O	[M-H]-	1-Octadecanol	Lipids	Free fatty acids	112-92-5	3.21978e+06	3.08659e+06	3.07671e+06	3.12917e+06	2.92949e+06	3.04048e+06	3.08096e+06	3.03666e+06	3.04685e+06	3.18877e+06	3.09104e+06	3.13382e+06	-	-
Lmqn008288	C18H36O3	[M-H]-	3-Hydroxyoctadecanoic Acid	Lipids	Free fatty acids	45261-96-9	1.02394e+07	8.79981e+06	1.03951e+07	1.02285e+07	9.85883e+06	9.82532e+06	9.82918e+06	1.04803e+07	1.00152e+07	9.18051e+06	9.48325e+06	9.33598e+06	-	-
pmb0889	C18H30O2	[M+H]+	Punicic acid (9Z,11E,13Z-octadecatrienoic acid)	Lipids	Free fatty acids	544-72-9	355482	275258	256145	458883	344298	529430	550097	606137	1.18658e+06	433012	419242	419589	C08364	-
pme2827	C16H32O	[M-H]-	Palmitaldehyde	Lipids	Free fatty acids	629-80-1	4.16023e+06	3.3331e+06	3.18309e+06	3.74621e+06	3.55273e+06	3.77371e+06	3.96628e+06	4.19806e+06	4.19642e+06	2.66197e+06	2.68823e+06	2.76039e+06	C00517	ko00071
pmf0297	C20H42O	[M-H]-	1-Eicosanol	Lipids	Free fatty acids	629-96-9	839594	840458	750632	1.02183e+06	763341	1.13589e+06	782875	1.35985e+06	971201	950065	957015	920205	-	-
pmf0395	C18H34O2	[M+H]+	Oleic acid	Lipids	Free fatty acids	112-80-1	186819	194472	172548	192984	176816	200117	174365	167232	168707	195201	204339	199207	C00712	ko00061,ko00073,ko01040
Lmbn005487	C18H34O4	[M-H]-	12,13-DHOME; (9Z)-12,13-Dihydroxyoctadec-9-enoic acid	Lipids	Free fatty acids	263399-35-5	287012	278741	256884	284400	280110	277946	291240	293539	274610	275196	264606	264343	C14829	ko00591
Wcdp006929	C18H26O3	[M+H]+	(9Z,11E,13E,15Z)-4-Oxo-9,11,13,15-Octadecatetraenoic Acid	Lipids	Free fatty acids	17699-21-7	606986	1.05178e+06	467696	630517	487507	623469	1.05261e+06	563957	687801	658906	682307	689313	-	-
pmn001606	C20H38O2	[M-H]-	Eicosenoic acid	Lipids	Free fatty acids	26764-41-0	1.68222e+07	2.79021e+07	1.66167e+07	1.86606e+07	1.6394e+07	1.99836e+07	1.93177e+07	1.80579e+07	2.78355e+07	2.00838e+07	2.09742e+07	2.01642e+07	C16526	ko01040
MWSslk132	C16H30O4	[M-H]-	Hexadecanedioic acid	Lipids	Free fatty acids	505-54-4	828129	857407	908574	854782	852185	904748	850402	891304	893612	864813	862374	825312	C19615	ko00073,ko01100
Lmcn009539	C19H34O2	[M-H]-	E,E,Z-1,3,12-Nonadecatriene-5,14-diol	Lipids	Free fatty acids	-	2.09006e+07	1.55823e+07	1.45129e+07	1.74954e+07	1.47118e+07	19752740	2.32696e+07	1.6377e+07	1.87633e+07	1.11221e+07	1.10142e+07	1.1583e+07	-	-
Rfmb091	C18H32O3	[M-H]-	9S-Hydroxy-10E,12Z-octadecadienoic acid*	Lipids	Free fatty acids	15514-85-9	156083	107569	98018.9	149486	140376	163312	235945	247062	330230	171739	179303	170603	C14767	ko00591
pmb2640	C12H24O2	[M-H]-	Dodecanoic acid (Lauric acid)	Lipids	Free fatty acids	143-07-7	856545	671074	808569	798593	818836	817479	823067	791595	726440	744052	743550	779817	C02679	ko00061,ko01100,ko01110
Hmqp005455	C18H32O3	[M+H]+	15(R)-Hydroxylinoleic Acid	Lipids	Free fatty acids	177931-23-6	110316	26725.7	76998.7	150574	72950.2	92960.6	59545.6	42748	72744.2	68899.9	70113.9	72730	-	-
Zbfn013528	C16H32O3	[M-H]-	(R)-Beta-Hydroxypalmitic Acid	Lipids	Free fatty acids	-	1.72406e+06	1.5496e+06	1.44615e+06	1.39216e+06	1.29002e+06	1.36653e+06	1.60516e+06	1.45566e+06	1.87262e+06	1.47663e+06	1.45935e+06	1.3981e+06	-	-
mws1488	C16H32O2	[M-H]-	Palmitic acid	Lipids	Free fatty acids	57-10-3	242260	238982	239142	230726	218721	242418	240863	225688	226460	208250	218362	219795	C00249	ko00061,ko00062,ko00071,ko00073,ko01040,ko01100,ko01212
Lmbn009444	C18H34O3	[M-H]-	Ricinoleic acid	Lipids	Free fatty acids	141-22-0	447980	339473	413408	471037	387534	442312	403412	422444	427706	434655	412075	433594	C08365	-
Zmyn004732	C18H30O3	[M-H]-	2R-hydroxy-9Z,12Z,15Z-octadecatrienoic acid	Lipids	Free fatty acids	-	77221.2	21735.7	23639.2	50129.2	34013.1	43998.5	46861.4	69629.9	150066	49969.9	49312.2	52237.8	C16342	ko00592
MWS1900	C11H20O4	[M-H]-	Undecanedioic acid	Lipids	Free fatty acids	1852-04-6	796705	764629	739202	779544	796886	755916	717568	800268	798464	756342	782846	805521	-	-
pmb2791	C18H30O4	[M-H]-	9-Hydroperoxy-10E,12,15Z-octadecatrienoic acid	Lipids	Free fatty acids	111004-08-1	407861	450417	404989	431281	408956	392522	427144	414823	426893	415091	396024	389769	C16321	ko00592,ko01110
MWS0552	C15H28O2	[M-H]-	Cis-10-Pentadecenoic Acid(C15:1)	Lipids	Free fatty acids	84743-29-3	668835	363142	475809	376552	967967	391575	552390	485036	408263	1.93112e+06	1.83608e+06	1.95709e+06	-	-
Zmyn004676	C18H30O3	[M-H]-	17-Hydroxylinolenic acid	Lipids	Free fatty acids	-	173773	229669	132815	133604	89384.6	112337	111781	143104	152793	127454	131446	121743	C16346	ko00592
mws5045	C12H24O3	[M-H]-	12-Hydroxydodecanoic acid	Lipids	Free fatty acids	505-95-3	40542.1	50639.9	42645.5	40667.3	40756.3	37468	47248.1	40873.6	44202.5	41733.8	38994.4	39129.9	C08317	-
Wafn011571	C18H32O3	[M-H]-	alpha-Hydroxylinoleic acid*	Lipids	Free fatty acids	57818-44-7	160000	105768	103774	129830	137307	154568	220810	250071	325293	173329	161078	163517	-	-
MWS5231	C13H24O4	[M-H]-	Tridecanedioic acid	Lipids	Free fatty acids	505-52-2	3.41421e+06	3.36546e+06	3.33448e+06	3.48372e+06	3.31613e+06	3.35854e+06	3.44799e+06	3.31041e+06	3.1647e+06	3.32415e+06	3.53604e+06	3.27057e+06	-	-
Lmbn004685	C18H32O4	[M-H]-	5S,8R-DiHODE; (5S,8R,9Z,12Z)-5,8-Dihydroxyoctadeca-9,12-dienoate	Lipids	Free fatty acids	-	92684.5	50233.6	59055.8	55263.6	38266.2	47038.2	163249	61981.2	69146.3	58628.2	60694.3	63741.6	C20186	ko00591
mws0752	C11H22O2	[M-H]-	Undecylic Acid	Lipids	Free fatty acids	112-37-8	4.71325e+06	4.52564e+06	4.89957e+06	4.45246e+06	4.73479e+06	4.81489e+06	4.49365e+06	4.29283e+06	4.30191e+06	4.22595e+06	4.57786e+06	4.57112e+06	C17715	-
Zbfn005682	C12H22O6S	[M-H]-	(2E,4E)-11-hydroxy-10-(hydroxymethyl)undeca-2,4-dien-1-yl hydrogen sulfate	Lipids	Free fatty acids	-	154392	144287	118273	172674	116569	147574	101656	131409	166152	123292	133388	123531	-	-
Zmyn004449	C18H30O4	[M-H]-	9-Hydroxy-12-oxo-10(E),15(Z)-octadecadienoic acid	Lipids	Free fatty acids	-	29000.6	57737.6	23000.5	26778.3	23192.3	29415.8	31859.7	33205	42138.4	34027.9	36484.3	33485.5	C21923	ko00592,ko01110
mws0474	C12H22O4	[M-H]-	Dodecanedioic aicd	Lipids	Free fatty acids	693-23-2	24256.3	21169	18886.8	31412.6	26413.8	22751.5	22824.4	24599.9	22307.4	23467.6	23208.6	25269	C02678	-
pmn001694	C18H34O5	[M-H]-	9,10,13-Trihydroxy-11-Octadecenoic Acid	Lipids	Free fatty acids	29907-57-1	341113	102457	89120.2	205102	128594	211570	197083	196020	425944	199867	189590	208309	C14835	ko00591
Zmzn003953	C18H30O4	[M-H]-	13(s)-hydroperoxy-(9z,11e,15z)-octadecatrienoic acid	Lipids	Free fatty acids	67597-26-6	6.42147e+06	6.27183e+06	6.51354e+06	7.13531e+06	5.05799e+06	7.18802e+06	6.13889e+06	7.53817e+06	6.81979e+06	6.198e+06	5.94215e+06	6.5325e+06	C04785	ko00592,ko01100,ko01110
Zmyn005252	C17H34O3	[M-H]-	3-Hydroxy-palmitic acid methyl ester	Lipids	Free fatty acids	51883-36-4	82368.4	89898.1	79682.8	60359.4	74725.5	77870	76616.4	74913	75334.5	47939.8	52913.2	50779.1	C11849	-
Wacn005438	C21H38O8	[M+CH3COOH-H]-	Hydroxypentadecenoic acid glucoside	Lipids	Free fatty acids	-	1.46048e+06	2.39782e+06	2.47374e+06	1.60314e+06	1.00955e+06	1.64025e+06	2.0178e+06	1.56891e+06	2.30027e+06	1.79739e+06	1.75441e+06	1.63076e+06	-	-
Lmbn005662	C18H32O3	[M-H]-	9(10)-EpOME;(9R,10S)-(12Z)-9,10-Epoxyoctadecenoic acid	Lipids	Free fatty acids	16833-56-0	24529.1	11823.3	34142.3	22491.5	27158.2	19897.8	21829.2	35190.6	46930.7	22356.6	20313.9	20633.8	C14825	ko00591,ko01100
pmb2804	C18H32O4	[M-H]-	13S-Hydroperoxy-9Z,11E-octadecadienoic acid	Lipids	Free fatty acids	33964-75-9	45992.5	10836.9	16787.2	31489	26715	32778.8	34941.4	47841.1	124006	39147.9	39638.5	35886.7	C04717	ko00591,ko01100
mws0366	C18H30O2	[M-H]-	γ-Linolenic Acid*	Lipids	Free fatty acids	506-26-3	1.21286e+07	1.69336e+07	1.15823e+07	1.5038e+07	1.13645e+07	1.44276e+07	1.39201e+07	1.24212e+07	2.09942e+07	1.46843e+07	1.37869e+07	1.30813e+07	C06426	ko00591,ko01040,ko01100
Lmbn007891	C18H34O4	[M-H]-	Hydroxy ricinoleic acid	Lipids	Free fatty acids	-	78649.6	39698.6	35304.4	55775.2	31853	41388.1	37246	29848.8	77175.7	40535.4	46092.8	44603.7	-	-
pmb2643	C14H26O2	[M-H]-	Myristoleic acid	Lipids	Free fatty acids	544-64-9	84664.7	174751	21573	41919.3	51786.1	57513.6	52988.8	51889.9	56208.9	64013.9	63894.2	56866.6	C08322	-
pmb2636	C20H32O4	[M-H]-	8,15-Dihydroxy-5,9,11,13-eicosatetraenoic acid	Lipids	Free fatty acids	77667-08-4	328989	447236	319464	448145	315277	404705	426988	445090	404891	399920	408162	358296	-	-
mws0367	C18H30O2	[M-H]-	α-Linolenic Acid*	Lipids	Free fatty acids	463-40-1	1.04567e+07	1.84106e+07	1.14236e+07	1.4742e+07	8.19178e+06	1.41473e+07	1.19354e+07	1.24285e+07	1.74954e+07	1.49312e+07	1.33339e+07	1.52147e+07	C06427	ko00592,ko01040,ko01100,ko01110
MWS2430	C15H30O2	[M-H]-	13-methylmyristic acid	Lipids	Free fatty acids	2485-71-4	44979.6	59900.9	54365.5	56297.4	55807.3	48279.5	48232.1	48407.3	60372.2	50048.9	45215.9	43515.1	-	-
mws0396	C18H34O2	[M-H]-	Elaidic Acid*	Lipids	Free fatty acids	112-79-8	1.03255e+07	9.48185e+06	1.14405e+07	1.79179e+07	1.29533e+07	2.11693e+07	1.61892e+07	1.71541e+07	1.67636e+07	1.36938e+07	1.54941e+07	1.57708e+07	C01712	-
Sazp010264	C45H70O10	[M+H]+	Monogalactosyldiacylglycerol	Lipids	Free fatty acids	-	25937.5	728092	645.869	16566.7	10287.9	9252.49	12351.7	53148.4	22314.9	109638	128838	118116	-	-
Lmyn007883	C16H32O4	[M-H]-	9,16-Dihydroxypalmitic acid	Lipids	Free fatty acids	38076-49-2	524260	313682	260051	427769	306899	472568	361657	401007	1.62594e+06	450139	435162	508699	-	-
Wafn015217	C20H40O3	[M-H]-	Hydroxyicosanoic Acid	Lipids	Free fatty acids	-	107753	22900.4	32813.4	135570	39177.5	130193	37525.1	51360.8	135174	77112.5	64238.9	71175	-	-
pmb0885	C18H26O3	[M+H]+	4-Oxo-9Z,11Z,13E,15E-Octadecatetraenoic Acid	Lipids	Free fatty acids	-	107349	285869	106069	120186	97097.5	92455	189798	97219.9	165454	130705	107942	122682	-	-
Lmbn005287	C18H32O4	[M-H]-	7S,8S-DiHODE; (9Z,12Z)-(7S,8S)-Dihydroxyoctadeca-9,12-dienoic acid*	Lipids	Free fatty acids	143288-65-7	35923.8	47040.3	46990.9	41374.9	38046.5	36905.6	43040.5	40200.7	41021.6	44267.6	36334.5	40124.2	C07354	ko00591
YC512118	C18H35NO	[M+H]+	Oleamide (9-Octadecenamide)	Lipids	Free fatty acids	301-02-0	39115.9	34679.9	26947.3	24873.5	21475.5	22534.5	23116.7	74603.9	25716.7	31624.8	31259.3	37390.9	C19670	-
Lmyn012331	C18H34O2	[M-H]-	Petroselinic acid*	Lipids	Free fatty acids	593-39-5	623093	735621	543214	1.01149e+06	1.12463e+06	2.0336e+06	1.48593e+06	1.26855e+06	690205	1.22184e+06	1.33071e+06	1.49913e+06	C08363	-
Zmyn005384	C18H36O3	[M-H]-	2R-Hydroxyoctadecanoic Acid*	Lipids	Free fatty acids	26633-48-7	185969	272404	213295	201983	208400	238710	196834	307823	232928	168267	209600	196601	C03042	-
mws2623	C18H34O2	[M-H]-	11-Octadecanoic acid(Vaccenic acid)*	Lipids	Free fatty acids	506-17-2	2.49866e+06	2.33968e+06	2.67808e+06	4.7124e+06	3.21854e+06	5.47432e+06	3.72586e+06	4.39525e+06	4.03238e+06	3.19521e+06	3.90381e+06	3.89627e+06	C21944	-
pmn001691	C18H32O5	[M-H]-	9,12,13-Trihydroxy-10,15-octadecadienoic acid	Lipids	Free fatty acids	-	61201.1	15103	14263.9	24198.3	22598.6	31406.1	21698.7	13216.8	111905	36946.1	40678.8	32487.2	-	-
Lmbn005923	C18H30O2	[M-H]-	Crepenynic acid	Lipids	Free fatty acids	2277-31-8	63877.1	100224	51688.5	62651.1	45940.1	64902.3	59131.7	50297	83442.7	73855.3	60558	59758.1	C07289	ko00591
mws0371	C22H32O2	[M-H]-	Cis-4,7,10,13,16,19-Docosahexaenoic Acid	Lipids	Free fatty acids	6217-54-5	60358.4	79050.6	103540	98446.5	86307.2	94979.6	66387.2	112579	103339	82392.3	101917	104000	C06429	ko01040
pmn001610	C20H36O2	[M-H]-	Eicosadienoic acid	Lipids	Free fatty acids	5598-38-9	455980	637495	346796	687707	317788	240010	469462	476303	365829	661425	545969	524506	C16525	ko01040
MWSmce539	C18H34O4	[M+H]+	Dibutyl sebacate	Lipids	Free fatty acids	109-43-3	73367.1	159529	61472	77556.4	69135.1	77520.2	79574.4	72377.8	71096.5	49000	61124.5	63215.8	-	-
Zmpn003698	C20H34O2	[M-H]-	11,14,17-Eicosatrienoic acid	Lipids	Free fatty acids	17046-59-2	300425	153755	164652	220589	161902	168788	322822	179710	154561	18007.9	13181.6	13461	C16522	ko01040
pmb1650	C18H30O2	[M+H]+	Octadeca-11E,13E,15Z-trienoic acid	Lipids	Free fatty acids	25575-00-2	6.92648e+06	5.53234e+06	6.36083e+06	6.59997e+06	6.88674e+06	4.90871e+06	7.05242e+06	6.60181e+06	6.82026e+06	6.38237e+06	4.273e+06	5.61549e+06	-	-
pma0461	C18H28O2	[M+H]+	14,15-Dehydrocrepenynic acid	Lipids	Free fatty acids	4154-44-3	486374	597232	566293	782325	523357	565921	549296	700139	2.13879e+06	631391	913588	687643	-	-
Rfmb087	C18H32O4	[M-H]-	9-Hydroxy-13-oxo-10-octadecenoic Acid	Lipids	Free fatty acids	-	78525.5	59386.2	31930.2	89124.8	20623.1	40522	50601.8	50233.2	48737.5	36371.4	63316.8	53733.5	-	-
Lmmn006896	C20H38O5	[M-H]-	3-Hydroxy-4-methyl-2-tridecanoyloxypentanoic acid methyl ester	Lipids	Free fatty acids	-	125771	136652	198134	171121	143501	273008	159123	195672	168472	163572	260214	149277	-	-
Wcdp007388	C18H26O2	[M+H]+	(10Z,14E,16E)-10,14,16-Octadecatrien-12-Ynoic Acid	Lipids	Free fatty acids	-	143888	363904	151627	54167.7	61176.6	104180	57143.2	123785	169716	146678	163333	82469.1	-	-
MWS80007	C18H32O4	[M-H]-	13-Hydroperoxy-9Z,11E-octadecadienoic acid*	Lipids	Free fatty acids	23017-93-8	53771.5	61023.3	52141.2	28400.1	25544	27517.1	39135	58931	53518.5	56620.7	30883.3	34819.8	-	-
MWS4295	C18H36O3	[M-H]-	DL-2-hydroxystearic acid*	Lipids	Free fatty acids	629-22-1	173671	354793	203493	150485	253101	186066	177944	363255	303389	151431	177904	287606	-	-
Lmwp102712	C14H24O2	[M+H]+	Goshuyic acid	Lipids	Free fatty acids	39039-37-7	160095	182186	125035	193470	79453.2	127304	73116.5	74318.1	104014	103610	200145	122457	-	-
pmp001259	C28H47NO8	[M+H]+	5,8,11,14-Pentadecanoamide	Lipids	Free fatty acids	-	2267920	1.05211e+06	1722020	2685085	1304285	2892420	1985415	1811455	2386505	887824	2500095	1917830	-	-
Wcdp010162	C21H36O4	[M+H]+	1-Monolinolenoyl-Rac-Glycerol*	Lipids	Glycerol ester	18465-99-1	364626	479514	380180	757405	396490	531454	660072	569186	533889	500496	491131	489697	-	-
Lmsp010763	C21H36O4	[M+H]+	Monolinolenin*	Lipids	Glycerol ester	75685-85-7	338695	575878	404361	786532	407063	562720	655680	580732	585987	516978	546785	498337	-	-
Zbfn007626	C25H48NO7P	[M-H]-	1-Linoleoyl-2-Lysophosphatidic Acid Monobutylamine Ester	Lipids	Glycerol ester	-	2.78291e+06	2.78076e+06	2.69805e+06	2.20945e+06	2.21823e+06	2.43392e+06	2.40056e+06	1.87765e+06	3.13355e+06	2.59202e+06	2.53973e+06	2.86662e+06	-	-
Hmyn007081	C22H43O9P	[M-H]-	LysoPG 16:1	Lipids	Glycerol ester	-	6775.41	69387.8	31551.1	38634	32203.8	46076.7	23158.7	13866.4	18307.8	31886.3	32798.2	28808.2	-	-
Lmhp011562	C21H36O4	[M+H]+	1-α-Linolenoyl-glycerol*	Lipids	Glycerol ester	-	387390	514411	368875	906851	422395	570449	782770	627517	624529	552846	494863	563694	-	-
Lmfp009701	C21H36O4	[M+H]+	Glycerol 9(E),11(Z),13(E)-octadecatrienoyl ester*	Lipids	Glycerol ester	-	371720	572832	402763	842133	429908	561950	688164	564178	580694	527273	542295	459565	-	-
Hmyn007168	C22H45O9P	[M-H]-	LysoPG 16:0	Lipids	Glycerol ester	-	417130	377897	274006	699805	587813	811572	663220	557633	695788	539237	637979	562923	-	-
Wagn011658	C31H58O14	[M-H]-	1-Palmitoyl-Sn-Glycerol 3-O-Diglucoside	Lipids	Glycerol ester	-	452733	278415	199377	554379	370370	601361	308522	387063	465742	386385	453724	372494	-	-
Hmyn007087	C25H49O11P	[M-H]-	LysoPI 16:0	Lipids	Glycerol ester	-	950.82	2852.03	2334.72	1870.39	1971.21	1963.88	2000.16	1966.22	2984.91	2166.74	2172.25	2620.88	-	-
Lmyn005812	C33H56O14	[M-H]-	Gingerglycolipid A	Lipids	Glycerol ester	145937-22-0	313773	175758	143425	384417	470472	552158	604695	305460	697742	386245	419149	334473	-	-
Wagn012030	C31H58O14	[M-H]-	2-Palmitoyl-Sn-Glycerol 3-O-Diglucoside	Lipids	Glycerol ester	-	574220	367916	414729	777927	541139	661430	588632	482844	456829	566651	512003	437557	-	-
Lmxp010913	C35H66NO9P	[M+H]+	1-(9Z-Octadecenoyl)-2-(9-oxo-nonanoyl)-sn-glycero-3-phosphocholine	Lipids	Glycerol ester	-	119763	118414	60605.6	108147	107587	77867.1	54480.4	102131	75721.1	36438.1	49464.8	42414.9	-	-
pmd0153	C19H39O7P	[M-H]-	LysoPA 16:0	Lipids	Glycerol ester	22002-85-3	323775	259105	217832	178026	355687	327845	324550	319007	260246	82931.7	123965	110288	C04036	-
Zbfn008434	C27H48O9	[M-H]-	1-O-Linoleoyl-3-O-galactopyranosyl-L-glycerol	Lipids	Glycerol ester	-	30070.2	10427.2	5259.59	15931.3	12273.5	12860.7	23516.7	14281.3	20510.8	14491.5	9334.55	13944.4	-	-
pmp001270	C24H48NO7P	[M+H]+	LysoPC 16:1*	Lipids	LPC	76790-27-7	918434	469799	710040	1.00634e+06	374633	999337	605915	523953	1.60659e+06	897509	875433	873990	-	-
pmp001273	C26H50NO7P	[M+H]+	LysoPC 18:2	Lipids	LPC	-	1.31756e+07	1.17261e+07	1.3445e+07	9.50168e+06	1.09425e+07	1.2722e+07	1.24709e+07	9.93786e+06	14650755	1.15249e+07	1.18836e+07	1.18582e+07	-	-
Wcdp007360	C24H50NO7P	[M+H]+	LysoPC 16:0*	Lipids	LPC	17364-16-8	2.82427e+07	2.99635e+07	4.33373e+07	3.71129e+07	2.46719e+07	4.40367e+07	4.06671e+07	3.0642e+07	3.85335e+07	3.51369e+07	3.56307e+07	3.67062e+07	-	-
pmd0132	C24H50NO7P	[M+H]+	LysoPC 16:0(2n isomer)*	Lipids	LPC	-	3.05673e+07	3.16861e+07	4.62363e+07	3.92958e+07	2.58921e+07	4.44316e+07	4.17169e+07	3.18212e+07	4.02467e+07	3.6407e+07	3.7633e+07	3.80965e+07	-	-
pmp001281	C26H52NO7P	[M+H]+	LysoPC 18:1*	Lipids	LPC	-	1.5485e+07	6.57381e+06	9.29605e+06	2.09162e+07	1.88477e+07	2.66603e+07	2.15444e+07	1.37018e+07	2.35569e+07	1.55327e+07	1.63062e+07	1.63175e+07	-	-
pmb0854	C26H48NO7P	[M+H]+	LysoPC 18:3	Lipids	LPC	-	8.49516e+06	1.56049e+07	1.84638e+07	1.3983e+07	1.02894e+07	1.64554e+07	1.67147e+07	1.21883e+07	1.49883e+07	1.30685e+07	1.32496e+07	1.37961e+07	-	-
Lmhp008833	C24H48NO7P	[M+H]+	LysoPC 16:1(2n isomer)*	Lipids	LPC	-	614698	411038	429524	605167	480773	654323	642890	675833	1.01909e+06	609634	650858	634730	-	-
pmp001251	C26H50NO7P	[M+H]+	LysoPC 18:2(2n isomer)	Lipids	LPC	-	1.34324e+07	9.91692e+06	1.39045e+07	8.16528e+06	9.69466e+06	1.27221e+07	1.02463e+07	8.14737e+06	1.28992e+07	1.19405e+07	1.25326e+07	1.17102e+07	-	-
Lmhp010190	C26H52NO7P	[M+H]+	LysoPC 18:1(2n isomer)*	Lipids	LPC	-	2.80645e+07	8.3817e+06	1.11247e+07	4.52645e+07	3.31885e+07	5.90127e+07	4.24203e+07	2.67921e+07	4.17718e+07	3.0674e+07	3.30291e+07	3.17675e+07	-	-
mws0126	C26H54NO7P	[M+H]+	LysoPC 18:0	Lipids	LPC	19420-57-6	728986	985160	1.46221e+06	854818	703972	1.07637e+06	958542	744608	788655	946450	1.02813e+06	1.00015e+06	-	-
pmb0865	C26H48NO7P	[M+H]+	LysoPC 18:3(2n isomer)	Lipids	LPC	-	6.12523e+06	1.1609e+07	1.49224e+07	1.02251e+07	6.54608e+06	1.14668e+07	1.19718e+07	9.08444e+06	1.10452e+07	9.64632e+06	1.10027e+07	1.05626e+07	-	-
pmd0136	C26H54NO7P	[M+H]+	LysoPC 18:0(2n isomer)	Lipids	LPC	-	556639	678269	1.04073e+06	658411	523638	808853	679673	481883	608277	704501	811065	749224	-	-
mws0289	C23H46NO7P	[M+H]+	LysoPE 18:1*	Lipids	LPE	89576-29-4	1.12143e+06	736969	1.15064e+06	2.39252e+06	1.84268e+06	2.16519e+06	1.82881e+06	1.20605e+06	1.56289e+06	1.44413e+06	1.37685e+06	1.45689e+06	-	-
pmb0881	C23H44NO7P	[M+H]+	LysoPE 18:2	Lipids	LPE	-	2.77993e+06	2.15558e+06	2.70377e+06	1.02793e+06	1.75718e+06	3.14846e+06	2.91244e+06	2.07532e+06	2.04737e+06	2.34491e+06	2.44431e+06	2.49293e+06	-	-
Lmhp008885	C20H42NO7P	[M+H]+	LysoPE 15:0(2n isomer)	Lipids	LPE	-	30474.7	21260.6	15993	31115.9	42304.6	48048.6	46292.8	34615	42972.3	39324.4	39175.1	36714.6	-	-
Waln011524	C26H54NO9P	[M-H]-	1-(2,3-dihydroxypropoxy)-3-(((2-(dimethylamino)ethoxy)(hydroxy)phosphoryl)oxy)propan-2-yl palmitate	Lipids	LPE	-	166605	171165	554389	279107	287336	394048	373694	172005	331871	291344	303547	277536	-	-
Lmhp008589	C23H42NO7P	[M+H]+	LysoPE 18:3(2n isomer)	Lipids	LPE	-	1.13018e+06	1.53159e+06	1.93698e+06	1.98876e+06	1.12744e+06	2.54473e+06	1.83575e+06	1.5192e+06	1.54809e+06	1.38004e+06	1.51979e+06	1.41757e+06	-	-
Lmhp010514	C25H48NO7P	[M+H]+	LysoPE 20:2(2n isomer)	Lipids	LPE	-	32775.8	22175.6	56004.3	37866	46081	41031.7	69064	40586.3	55853.3	49935	46215.1	51414.1	-	-
Lmhp010040	C25H46NO7P	[M+H]+	LysoPE 20:3*	Lipids	LPE	-	23045.8	56426	77616.1	53241.2	53446.5	57899.6	112084	78770	54656.4	88952.8	76900	84083.5	-	-
Lmhp009034	C21H42NO7P	[M+H]+	LysoPE 16:1*	Lipids	LPE	-	110302	71464.7	79929.6	131713	146969	155576	157277	144203	127715	122935	141125	126332	-	-
pmb0874	C23H44NO7P	[M+H]+	LysoPE 18:2(2n isomer)	Lipids	LPE	-	2.15931e+06	2.02319e+06	2.13735e+06	1.80103e+06	1.86828e+06	2.51168e+06	2.14306e+06	1.24879e+06	2.36238e+06	1.89956e+06	1.98099e+06	2.1934e+06	-	-
pmb0876	C21H44NO7P	[M+H]+	LysoPE 16:0	Lipids	LPE	53862-35-4	322412	270677	235468	323332	300390	891654	611711	314266	598738	422399	463720	394096	-	-
Lmhp008801	C23H42NO7P	[M+H]+	LysoPE 18:3	Lipids	LPE	-	1.66251e+06	2.01899e+06	2.52539e+06	2.8426e+06	2.05077e+06	3.23892e+06	2.88438e+06	2.57542e+06	2.24689e+06	2.35479e+06	2.10697e+06	2.01133e+06	-	-
pmd0160	C21H44NO7P	[M+H]+	LysoPE 16:0(2n isomer)	Lipids	LPE	-	3.81633e+06	2.88332e+06	2.89494e+06	4.62463e+06	2.69486e+06	5.53936e+06	5.56685e+06	2.94234e+06	3.77238e+06	3.78209e+06	3.3773e+06	4.11605e+06	-	-
pmb0883	C23H48NO7P	[M+H]+	LysoPE 18:0	Lipids	LPE	69747-55-3	63286.7	67061.6	68268.3	72287.6	82680	101635	76801.2	57894.4	68902.6	81602.3	90195.5	72335.1	-	-
Waln011009	C28H54NO9P	[M-H]-	2-(2,3-dihydroxypropoxy)-3-(((2-(dimethylamino)ethoxy)(hydroxy)phosphoryl)oxy)propyl (11Z,14Z)-octadeca-11,14-dienoate	Lipids	LPE	-	210422	182986	187650	139931	243559	185014	182356	133015	305473	169543	213215	203026	-	-
Lmhp009802	C25H46NO7P	[M+H]+	LysoPE 20:3(2n isomer)*	Lipids	LPE	-	46734	44942.2	80363.1	65991.8	44822.7	51020.3	101066	79343.6	60738.7	70848.8	64012.5	55310.5	-	-
WaYn011395	C28H56NO9P	[M-H]-	2-(2,3-dihydroxypropoxy)-3-(((2-(dimethylamino)ethoxy)(hydroxy)phosphoryl)oxy)propan-2-yl (Z)-14-Octadecenoic Acid	Lipids	LPE	-	33785.3	22237.9	31333.9	188919	97335.1	194854	60073.7	138452	71451.8	155648	122865	124401	-	-
Waln010192	C28H52NO9P	[M-H]-	2-(2,3-dihydroxypropoxy)-3-(((2-(dimethylamino)ethoxy)(hydroxy)phosphoryl)oxy)propyl (8E,11Z,14Z)-octadeca-8,11,14-trienoate	Lipids	LPE	-	209996	220625	227691	317072	181251	390742	447607	253869	450265	334473	330886	258289	-	-
Waln009920	C28H52NO9P	[M-H]-	1-(2,3-dihydroxypropoxy)-3-(((2-(dimethylamino)ethoxy)(hydroxy)phosphoryl)oxy)propan-2-yl (8E,11Z,14Z)-octadeca-8,11,14-trienoate	Lipids	LPE	-	278984	227338	143939	248757	234890	161187	355139	221735	348851	299812	273339	224552	-	-
Lmhp010757	C25H48NO7P	[M+H]+	LysoPE 20:2	Lipids	LPE	-	61275.5	27715.5	38658	29794.5	62991.9	38370.9	69544.7	44970.1	60383.1	54501.6	49821.6	40284.9	-	-
Waln010743	C28H54NO9P	[M-H]-	1-(2,3-dihydroxypropoxy)-3-(((2-(dimethylamino)ethoxy)(hydroxy)phosphoryl)oxy)propan-2-yl (11Z,14Z)-octadeca-11,14-dienoate	Lipids	LPE	-	176332	60088.1	123070	105083	106165	192179	206294	96793.1	186145	172147	171716	229726	-	-
Lmhp008763	C21H42NO7P	[M+H]+	LysoPE 16:1(2n isomer)*	Lipids	LPE	-	91017.1	71504	56934.5	125529	115101	162166	150677	94621.5	96837.7	137395	89282.7	104607	-	-
Waln011704	C28H56NO9P	[M-H]-	1-(2,3-dihydroxypropoxy)-3-(((2-(dimethylamino)ethoxy)(hydroxy)phosphoryl)oxy)propan-2-yl (Z)-14-Octadecenoic Acid	Lipids	LPE	-	109318	18886.1	25170.5	62634.6	55407.8	123975	87663.4	24927.9	64827	50044.2	79640.5	80716.6	-	-
Waln010449	C26H52NO9P	[M-H]-	1-(2,3-dihydroxypropoxy)-3-(((2-(dimethylamino)ethoxy)(hydroxy)phosphoryl)oxy)propan-2-yl (E)-hexadec-9-enoate	Lipids	LPE	-	14507	11731.1	13984.7	13761.4	13509.3	16874.8	19689.4	17398.8	31909.4	19730	11381	18506.3	-	-
pmb0856	C23H46NO7P	[M+H]+	LysoPE 18:1(2n isomer)*	Lipids	LPE	-	960036	270736	433987	1.91218e+06	872349	1.37632e+06	614649	937854	947019	758627	1.08846e+06	366736	-	-
pmb0168	C38H70NO8P	[M+H]+	PC(16:1/14:1)	Lipids	PC	-	250196	253371	317340	318774	208434	372167	315583	228349	301113	283650	283666	286180	-	-
mws0120	C8H20NO6P	[M+H]+	Choline Alfoscerate	Lipids	PC	28319-77-9	596456	695315	2.26182e+06	600769	697810	443896	906612	922646	987919	835749	852796	944055	C00670	ko00564,ko00565
pmp001264	C16H35NO2	[M+H]+	Hexadecylsphingosine	Lipids	Sphingolipids	-	1.34154e+07	1.22847e+07	1.50928e+07	1.24598e+07	2.30541e+07	1.61505e+07	1.48085e+07	1.20403e+07	1.1473e+07	2.4433e+07	2.4253e+07	2.37707e+07	-	-
Walp007738	C16H33NO3	[M+H]+	14-Amino-15-hydroxy-11-methylpentadecanoic acid	Lipids	Sphingolipids	-	1.02723e+06	1.24743e+06	996530	953246	924850	1.10477e+06	1.1223e+06	1.0516e+06	1.04484e+06	862052	841418	871919	-	-
Walp004906	C14H31NO3	[M+H]+	2-Aminotetradecane-1,11,13-triol	Lipids	Sphingolipids	-	106460	127344	164084	128557	98815.2	48345	903847	125702	119579	474167	492343	495255	-	-
Walp004752	C12H27NO2	[M+H]+	2-Aminododecane-1,4-diol	Lipids	Sphingolipids	-	434530	418696	562660	398656	279333	311515	2.39237e+06	378845	416209	1.53387e+06	1.42704e+06	1.49265e+06	-	-
pmb2221	C18H39NO3	[M+H]+	4-Hydroxysphinganine; Phytosphingosine	Lipids	Sphingolipids	554-62-1	2.07412e+06	481884	448009	2.25457e+06	2.18119e+06	2.93152e+06	2.42677e+06	1.98491e+06	2.88506e+06	1.97819e+06	2.07441e+06	1.92623e+06	C12144	ko00600,ko01100
WaYp005128	C14H31NO3	[M+H]+	2-Aminotetradecane-1,5,13-triol	Lipids	Sphingolipids	-	482734	723331	581350	437319	328760	348967	3.49552e+06	518788	405109	1.822e+06	1.68271e+06	1.79004e+06	-	-
Walp006011	C14H31NO2	[M+H]+	2-Aminotetradecane-1,4-diol	Lipids	Sphingolipids	-	340966	483243	464118	303103	221839	308185	1.36474e+06	304354	299088	1.12078e+06	1.03297e+06	1.03043e+06	-	-
ML10195036	C18H37NO2	[M+H]+	3-Dehydrosphinganine	Lipids	Sphingolipids	16105-69-4	123865	24195.6	110932	73058.5	105757	220067	123952	78219.2	106338	103768	98349.1	94008.8	C02934	ko00600,ko01100
MWS2027	C4H4N2O3	[M+H]+	Barbituric acid;Malonylurea;2,4,6-Pyrimidinetrione	Nucleotides and derivatives	Nucleotides and derivatives	67-52-7	8.37093e+06	8.28471e+06	9.64703e+06	1.09401e+07	8.95583e+06	1.0744e+07	9.13754e+06	9.85665e+06	7.80959e+06	8.81299e+06	8.7743e+06	8.68622e+06	C00813	ko00240,ko01100
pme3184	C10H14N5O6P	[M+H]+	2'-Deoxyadenosine-5'-monophosphate	Nucleotides and derivatives	Nucleotides and derivatives	653-63-4	5.53842e+06	1.23081e+07	7.64248e+06	7.57164e+06	4.47172e+06	8.66596e+06	4.68088e+06	4.89836e+06	4.33174e+06	6.59585e+06	6.49493e+06	6.55316e+06	C00360	ko00230,ko01100,ko01232
mws0668	C10H12N4O6	[M-H]-	Xanthosine	Nucleotides and derivatives	Nucleotides and derivatives	146-80-5	506231	991030	908370	1.17782e+06	1.06483e+06	1.04039e+06	1.35127e+06	1.25321e+06	1.44062e+06	1.02384e+06	1.0075e+06	1.01295e+06	C01762	ko00230,ko00232,ko01100,ko01110,ko01232,ko02010
pme3961	C10H13N5O3	[M+H]+	2'-Deoxyadenosine*	Nucleotides and derivatives	Nucleotides and derivatives	958-09-8	274716	197914	33161.7	167947	808711	170906	160736	144699	293843	267219	267968	271860	C00559	ko00230,ko01100,ko01232,ko02010
mws1715	C10H13N5O3	[M+H]+	Cordycepin (3'-Deoxyadenosine)*	Nucleotides and derivatives	Nucleotides and derivatives	73-03-0	274716	197914	33161.7	167947	808711	170906	160736	144699	293843	267219	267968	271860	C08431	-
MWSHC2054	C5H5N5	[M+H]+	Adenine	Nucleotides and derivatives	Nucleotides and derivatives	73-24-5	2.41974e+06	1.18118e+06	1.52061e+06	3.0037e+06	2.95557e+06	2.90791e+06	3.23691e+06	3.09927e+06	4.72687e+06	2.96526e+06	3.03176e+06	3.00365e+06	C00147	ko00230,ko00908,ko01100,ko01110,ko01232
pme0257	C4H4N2O2	[M-H]-	Uracil	Nucleotides and derivatives	Nucleotides and derivatives	66-22-8	4.84613e+06	5.60436e+06	5.39777e+06	5.21141e+06	4.55222e+06	5.40709e+06	5.04166e+06	4.97604e+06	4.56024e+06	5.24844e+06	5.11933e+06	5.19418e+06	C00106	ko00240,ko00410,ko00770,ko01100,ko01232
pme3967	C12H17N5O5	[M+H]+	2-(Dimethylamino)guanosine*	Nucleotides and derivatives	Nucleotides and derivatives	2140-67-2	242258	383300	371470	269210	347285	308216	325243	292335	278036	313468	307003	305775	-	-
pme0230	C10H13N5O4	[M+H]+	Adenosine*	Nucleotides and derivatives	Nucleotides and derivatives	58-61-7	1.26623e+07	2.76363e+07	8.37653e+06	1.59732e+07	2.81711e+07	2.57407e+07	3.1459e+07	4.30096e+07	3.40507e+07	2.55378e+07	2.48492e+07	2.49218e+07	C00212	ko00230,ko01100,ko01232,ko02010
mws0609	C10H12N5O7P	[M-H]-	Guanosine 3',5'-cyclic monophosphate	Nucleotides and derivatives	Nucleotides and derivatives	7665-99-8	2.5041e+06	1.17652e+06	1.25549e+06	2.23639e+06	2.08011e+06	3.04706e+06	2.10454e+06	1.81553e+06	1.94704e+06	1.92444e+06	1.85606e+06	1.88583e+06	C00942	ko00230,ko01100
Zmjp000966	C10H13N5O4	[M+H]+	Vidarabine	Nucleotides and derivatives	Nucleotides and derivatives	5536-17-4	1.27812e+07	2.79352e+07	8.39991e+06	1.55843e+07	2.82361e+07	2.52091e+07	3.06555e+07	4.11268e+07	3.44097e+07	2.41091e+07	2.44269e+07	2.35284e+07	-	-
pmb0981	C10H14N5O7P	[M+H]+	Adenosine 5'-monophosphate	Nucleotides and derivatives	Nucleotides and derivatives	61-19-8	1.01869e+07	1.22128e+07	1.70807e+07	1.47737e+07	1.74345e+07	1.6648e+07	1.77002e+07	1.52615e+07	1.80851e+07	1.42274e+07	1.47653e+07	1.46957e+07	C00020	ko00230,ko00908,ko01100,ko01110,ko01232,ko01240
MWS4525	C6H7N5O	[M+H]+	6-O-methylguanine	Nucleotides and derivatives	Nucleotides and derivatives	20535-83-5	418143	287561	451487	784897	568947	636839	709929	822577	868164	555252	568712	542657	-	-
pme0256	C5H4N4O2	[M-H]-	Xanthine	Nucleotides and derivatives	Nucleotides and derivatives	69-89-6	75726.1	32622.5	39232.9	64942.3	64993.9	132144	57209.2	65038.9	84649.6	62139.1	63906.7	65363.5	C00385	ko00230,ko00232,ko01100,ko01110,ko01232
pmc0066	C10H13N4O7P	[M+H]+	2'-Deoxyinosine-5'-monophosphate	Nucleotides and derivatives	Nucleotides and derivatives	3393-18-8	356626	530803	415306	483924	403392	384818	361148	354835	374043	380098	402878	389952	C06196	ko00230,ko01232
mws0884	C10H12N5O6P	[M-H]-	Cyclic 3',5'-Adenylic acid	Nucleotides and derivatives	Nucleotides and derivatives	60-92-4	730426	328550	429198	794812	718503	841174	704062	607743	694888	579860	616026	594980	C00575	ko00230,ko01100
pme2746	C27H33N9O15P2	[M-H]-	Riboflavin 5'-Adenosine Diphosphate	Nucleotides and derivatives	Nucleotides and derivatives	146-14-5	840427	1.84931e+06	1.51363e+06	1.09482e+06	888133	905226	1.05635e+06	856773	1.0429e+06	1.09311e+06	1.05718e+06	1.12785e+06	C00016	ko00740,ko01100,ko01110,ko01240
mws0248	C9H12N2O6	[M-H]-	Uridine	Nucleotides and derivatives	Nucleotides and derivatives	58-96-8	185323	544274	561038	272703	282866	252707	359645	350716	343333	311625	323775	333381	C00299	ko00240,ko01100,ko01232,ko02010
Zmfn000481	C14H22N2O16P2	[M-H]-	Uridine-5'-Diphosphate-D-Xylose	Nucleotides and derivatives	Nucleotides and derivatives	3616-06-6	386232	335224	459163	699537	655589	671025	584455	632818	647630	541098	547400	512256	C00190	ko00520,ko00908,ko01100,ko01250
pme1178	C10H13N5O5	[M+H]+	Guanosine	Nucleotides and derivatives	Nucleotides and derivatives	118-00-3	3.08655e+06	1.40495e+07	8.38018e+06	4.67166e+06	4.44145e+06	4.00609e+06	4.27558e+06	4.66944e+06	5.01342e+06	5.65738e+06	5.76903e+06	5.37174e+06	C00387	ko00230,ko01100,ko01232,ko02010
MW0154492	C21H27N6O18P3	[M-H]-	Nicotinate adenine dinucleotide phosphate	Nucleotides and derivatives	Nucleotides and derivatives	5502-96-5	5.0766e+06	5.34289e+06	5.65087e+06	4.22328e+06	6.42652e+06	3.98021e+06	5.26229e+06	5.7961e+06	4.81103e+06	5.00844e+06	5.15849e+06	5.39016e+06	-	-
pme3007	C9H14N2O12P2	[M-H]-	Uridine 5'-diphosphate	Nucleotides and derivatives	Nucleotides and derivatives	27821-45-0	254446	264956	248457	294570	324480	240461	298040	291478	251485	289242	268820	274911	C00015	ko00240,ko00908,ko01100,ko01232,ko01240
pme1194	C9H13N3O4	[M+H]+	2'-Deoxycytidine	Nucleotides and derivatives	Nucleotides and derivatives	951-77-9	340825	291619	314019	340445	343576	237061	351623	291867	233749	286637	307561	288333	C00881	ko00240,ko01100,ko01232,ko02010
mws0255	C4H5N3O	[M+H]+	Cytosine	Nucleotides and derivatives	Nucleotides and derivatives	71-30-7	519089	743189	723174	579553	715674	571052	582265	544331	519619	648065	664137	612741	C00380	ko00240,ko01100,ko01232
pme0183	C5H5N5O	[M+H]+	Isoguanine	Nucleotides and derivatives	Nucleotides and derivatives	3373-53-3	358627	502043	425436	277208	552909	442405	391779	395135	517960	466057	430622	437215	-	-
MWS5083	C17H21N4O9P	[M-H]-	Flavin Single Nucleotide(FMN)	Nucleotides and derivatives	Nucleotides and derivatives	6184-17-4	1.35723e+06	1.99594e+06	1.52999e+06	2.09593e+06	1.25571e+06	1.54893e+06	1.69464e+06	1.15263e+06	1.77452e+06	1.44629e+06	1.52673e+06	1.57845e+06	C00061	ko00190,ko00740,ko01100,ko01110,ko01240
pmc0281	C15H21N5O8	[M+H]+	Ribosyladenosine	Nucleotides and derivatives	Nucleotides and derivatives	-	1.95202e+06	1.92022e+06	1.71293e+06	2.00803e+06	1.82614e+06	2.48909e+06	1.50767e+06	1.68947e+06	1.83083e+06	1.80387e+06	1.97031e+06	1.86726e+06	-	-
Hmhp001812	C11H15N5O4	[M+H]+	2'-O-Methyladenosine	Nucleotides and derivatives	Nucleotides and derivatives	2140-79-6	469282	604888	518016	384581	562008	374598	410887	578161	453971	478732	444363	482552	-	-
mws1060	C10H12N4O5	[M-H]-	9-(Arabinosyl)hypoxanthine	Nucleotides and derivatives	Nucleotides and derivatives	7013-16-3	117215	127537	48003.1	244693	300764	278670	153076	110993	229184	170274	182129	186602	-	-
Zmyp000878	C10H13N5O5	[M+H]+	Crotonoside; 2-Hydroxyadenosine	Nucleotides and derivatives	Nucleotides and derivatives	1818-71-9	4.7144e+06	1.98099e+07	1.31435e+07	6.10236e+06	6.29985e+06	6.61999e+06	6.50106e+06	7.2587e+06	7.44162e+06	7.78206e+06	8.25161e+06	7.51294e+06	C08432	-
pme1109	C5H5N5O	[M+H]+	Guanine	Nucleotides and derivatives	Nucleotides and derivatives	73-40-5	1.10555e+06	1.99555e+06	1.36643e+06	1.58295e+06	1.20601e+06	1.61762e+06	959641	855609	1.05111e+06	1.21903e+06	1.25439e+06	1.13511e+06	C00242	ko00230,ko01100,ko01232
MWSmce295	C9H12N2O6	[M+H]+	1-beta-D-Arabinofuranosyluracil	Nucleotides and derivatives	Nucleotides and derivatives	3083-77-0	884304	820113	1.15465e+06	791717	920018	961270	1.04252e+06	1.06963e+06	1.19835e+06	746187	762762	821638	-	-
Zmsp001773	C10H13N5O4	[M+H]+	(2r,3s,4r,5s)-2-(6-aminopurin-9-yl)-5-(hydroxymethyl)oxolane-3,4-diol*	Nucleotides and derivatives	Nucleotides and derivatives	-	1.27938e+07	2.62405e+07	8.36263e+06	1.56966e+07	2.60785e+07	2.47934e+07	3.11264e+07	4.26074e+07	3.19441e+07	2.46365e+07	2.23862e+07	2.4302e+07	-	-
pmb0998	C10H14N5O8P	[M+H]+	Guanosine 5'-monophosphate	Nucleotides and derivatives	Nucleotides and derivatives	85-32-5	134906	167809	208234	223617	379940	231909	245335	248641	306396	218224	246731	233809	C00144	ko00230,ko01100,ko01232
pme1474	C11H15N5O3S	[M+H]+	5'-Deoxy-5'-(methylthio)adenosine	Nucleotides and derivatives	Nucleotides and derivatives	2457-80-9	2.31965e+07	1.73266e+07	2.76647e+07	4.69122e+07	4.35109e+07	4.18459e+07	3.48589e+07	3.12271e+07	2.95437e+07	2.72623e+07	2.77842e+07	3.06888e+07	C00170	ko00270,ko00908,ko01100
Lmqp000329	C8H14N3O7P	[M+H]+	5-Aminoimidazole ribonucleotide	Nucleotides and derivatives	Nucleotides and derivatives	25635-88-5	1.13058e+06	1.16283e+06	4.06551e+06	993073	1.36775e+06	771846	1.85415e+06	1.95157e+06	1.62586e+06	1.51949e+06	1.72749e+06	1.69524e+06	-	-
pmb2507	C5H11O7P	[M-H]-	2-Deoxyribose-1-phosphate	Nucleotides and derivatives	Nucleotides and derivatives	17210-42-3	322014	118972	240048	352231	209930	411577	442588	459950	364703	328680	325430	367696	C00672	ko00030,ko00240,ko01100
pmb0530	C21H27N7O14P2	[M+H]+	Nicotinic acid adenine dinucleotide	Nucleotides and derivatives	Nucleotides and derivatives	53-84-9	831148	1.14791e+06	2.13906e+06	1.23238e+06	1.9553e+06	847788	1.53566e+06	1.36417e+06	817990	1.3399e+06	1.17664e+06	1.19364e+06	C00003	ko00190,ko00730,ko00760,ko01100,ko01240
pmb2922	C15H24N2O17P2	[M-H]-	Uridine 5'-diphospho-D-glucose	Nucleotides and derivatives	Nucleotides and derivatives	133-89-1	3.16815e+06	2.62923e+06	3.69071e+06	3.46298e+06	3.40275e+06	3.34739e+06	3.426e+06	3.07954e+06	2.85661e+06	3085803	3.58357e+06	3.31566e+06	C00029	ko00040,ko00052,ko00053,ko00500,ko00520,ko00524,ko00561,ko00908,ko01100,ko01110,ko01240,ko01250
pme3732	C9H13N3O5	[M+H]+	Cytidine	Nucleotides and derivatives	Nucleotides and derivatives	65-46-3	393068	570367	841034	492989	538238	450729	606432	507156	549976	504956	567072	492690	C00475	ko00240,ko01100,ko01232,ko02010
pmb0374	C5H5N5	[M+H]+	2-Aminopurine	Nucleotides and derivatives	Nucleotides and derivatives	452-06-2	531462	928616	414186	530982	1.44074e+06	771262	1.00872e+06	1.51473e+06	1.16652e+06	840758	777292	721129	-	-
Zmmp002106	C3H9N3O2	[M+H]+	4-methyl-1,5,2,3-dioxadiazinan-2-amine	Nucleotides and derivatives	Nucleotides and derivatives	-	3.19978e+06	5.39699e+06	4.13602e+06	7.71445e+06	6.13177e+06	7.27491e+06	8.91326e+06	1.03795e+07	1.30638e+07	8.23187e+06	7.4395e+06	7.00743e+06	-	-
pmb0964	C16H23N5O5	[M+H]+	Isopentenyladenine-7-N-glucoside	Nucleotides and derivatives	Nucleotides and derivatives	-	8.39416e+06	7.88767e+06	1.24453e+07	1.00283e+07	1.085e+07	9.21753e+06	1.54973e+07	1.61649e+07	1.64561e+07	9.70986e+06	1.1473e+07	1.09511e+07	-	-
pme1119	C10H12N4O5	[M+H]+	Inosine	Nucleotides and derivatives	Nucleotides and derivatives	58-63-9	7.23571e+06	1.83808e+06	1.74059e+06	1.00455e+07	9.94858e+06	8.99869e+06	9.41824e+06	9.99871e+06	9.83115e+06	5.78034e+06	6.77878e+06	6.64818e+06	C00294	ko00230,ko01100,ko01232,ko02010
mws0724	C10H13N5O6	[M-H]-	8-Hydroxyguanosine	Nucleotides and derivatives	Nucleotides and derivatives	3868-31-3	46142.7	30437.3	35998.7	67774.7	50244.9	126985	34435.5	27934.1	32161.1	54155.3	64184.4	61537.5	-	-
mws0572	C5H7N3O	[M+H]+	5-Methylcytosine	Nucleotides and derivatives	Nucleotides and derivatives	554-01-8	594013	347291	371029	696496	575967	624334	567267	518039	670607	528820	544065	620181	C02376	ko00240,ko01100
pmb0532	C10H13N4O8P	[M+H]+	Inosine 5'-monophosphate	Nucleotides and derivatives	Nucleotides and derivatives	131-99-7	643970	732033	1.26246e+06	1.16106e+06	1.19194e+06	1.32043e+06	1.10473e+06	1.23456e+06	1.28227e+06	933286	1.06914e+06	1.10637e+06	C00130	ko00230,ko01100,ko01110,ko01232,ko01240
pme1373	C9H14N3O7P	[M-H]-	2'-Deoxycytidine-5'-monophosphate	Nucleotides and derivatives	Nucleotides and derivatives	1032-65-1	70569.4	207011	84696	84667.5	95546.2	89229.6	82462.2	64651.7	72826.6	70118.9	83216	80593.3	C00239	ko00240,ko01100,ko01232
mws0847	C6H7N5	[M+H]+	1-Methyladenine	Nucleotides and derivatives	Nucleotides and derivatives	5142-22-3	487370	508252	323766	488829	269801	370196	373739	350983	381350	409877	385356	342592	C02216	-
mws0976	C9H12N2O6	[M-H]-	β-Pseudouridine	Nucleotides and derivatives	Nucleotides and derivatives	1445-07-4	48207.8	59671	79549.6	57473	65215.3	68972	50854.2	59371.7	73190.1	60755.8	58216.6	69671.5	C02067	ko00240,ko01100
pme3337	C14H17N5O8	[M+H]+	Succinyladenosine	Nucleotides and derivatives	Nucleotides and derivatives	4542-23-8	1.91435e+06	1.20822e+06	1.74938e+06	2.29856e+06	2.90912e+06	2.87961e+06	2.04962e+06	1.8091e+06	2.06323e+06	1.78123e+06	2.16368e+06	2.09852e+06	-	-
MWS5173	C4H5N3O	[M+H]+	Isocytosine	Nucleotides and derivatives	Nucleotides and derivatives	108-53-2	421613	824134	949010	365149	426106	269124	404116	341838	405605	445705	554095	518619	-	-
mws1409	C15H22N2O18P2	[M-H]-	Uridine-5'-diphosphoglucuronic acid	Nucleotides and derivatives	Nucleotides and derivatives	-	44006.9	38425.1	40008.2	37698	84593.8	40565.4	37457.6	46295.1	38955.7	39463.8	44451.6	49152.4	-	-
mws0675	C11H15N2O8P	[M+H]+	β-Nicotinamide mononucleotide	Nucleotides and derivatives	Nucleotides and derivatives	1094-61-7	65550.6	62309.1	17426.7	175351	61278.5	217987	202349	103902	43692.5	96305.4	111022	120364	C00455	ko00760,ko01100
pme3188	C9H13N2O9P	[M-H]-	Uridine 5'-monophosphate	Nucleotides and derivatives	Nucleotides and derivatives	58-97-9	133993	305872	360101	473673	656922	402169	634662	547235	591611	539378	431123	493040	C00105	ko00240,ko01100,ko01232,ko01240
pme2060	C10H13N5	[M+H]+	N6-Isopentenyladenine	Nucleotides and derivatives	Nucleotides and derivatives	2365-40-4	279305	184831	164854	294430	213072	286176	350435	274810	315355	235680	249930	198650	C04083	ko00908,ko01110,ko04075
MWSmce668	C10H16N5O13P3	[M-H]-	ATP; Adenosine 5'-Triphosphate	Nucleotides and derivatives	Nucleotides and derivatives	56-65-5	190708	147971	168672	240568	269213	193698	220058	252154	200657	206952	240608	190695	C00002	ko00190,ko00195,ko00230,ko00908,ko01100,ko01110,ko01232,ko01240
pme0033	C5H4N4O	[M+H]+	Hypoxanthine	Nucleotides and derivatives	Nucleotides and derivatives	68-94-0	5.48075e+06	4.58909e+06	4.36141e+06	3.42393e+06	3.47159e+06	3.52365e+06	3.67016e+06	3.46561e+06	4.44029e+06	5.12885e+06	4.24533e+06	4.10352e+06	C00262	ko00230,ko01100,ko01232
pme2117	C10H15N5O10P2	[M-H]-	Adenosine 5'-diphosphate	Nucleotides and derivatives	Nucleotides and derivatives	58-64-0	824267	464918	890834	1.01537e+06	1.05082e+06	795908	915231	961417	946368	737261	950161	863287	C00008	ko00190,ko00195,ko00230,ko00908,ko01100,ko01110,ko01232,ko01240
mws0852	C20H22N8O5	[M+H]+	Methotrexate	Nucleotides and derivatives	Nucleotides and derivatives	59-05-2	9	9	9	11054	9257.02	17590.8	14148	6899.45	13758.9	19810.8	22381.6	27638.8	C01937	-
pmb0197	C11H15N5O5	[M+H]+	N7-Methylguanosine	Nucleotides and derivatives	Nucleotides and derivatives	20244-86-4	123644	144471	116478	187691	117745	144458	163957	145485	205441	115087	163147	149084	C20674	-
MWS2910	C10H15N3O4	[M+H]+	5-Methyl-2'-Deoxycytidine	Nucleotides and derivatives	Nucleotides and derivatives	838-07-3	136635	170487	164534	93603.3	98268.1	77758.9	92087.9	95146.6	82114.4	126970	174270	125181	C03592	-
ML10180524	C9H13N3O5	[M+H]+	Cytarabine	Nucleotides and derivatives	Nucleotides and derivatives	147-94-4	837293	1.8972e+06	1.67859e+06	967130	1.26361e+06	864363	1.51583e+06	1.05073e+06	1.07622e+06	849970	1.06912e+06	1.26576e+06	C02961	-
pme0151	C4H6N2O2	[M+H]+	5,6-Dihydrouracil	Nucleotides and derivatives	Nucleotides and derivatives	504-07-4	85051.3	81193.8	62963.4	54753.2	62369.8	77506.2	53670.1	63011.9	48160.9	54996.2	37130.3	50762.5	C00429	ko00240,ko00410,ko00770,ko01100
MWS4354	C11H15N5O4	[M+H]+	N6-methyladenosine	Nucleotides and derivatives	Nucleotides and derivatives	1867-73-8	64212.1	41438.3	59309.8	101770	43173.3	95400.2	68537.9	103802	79316	60431.2	60353.7	84721.4	-	-
pmf0289	C15H21N5O4	[M+H]+	Riboprine	Nucleotides and derivatives	Nucleotides and derivatives	7724-76-7	21476	17975.4	28340	9	9	9	26675	40074	40689.1	21601	21675	30421.1	C16427	ko00908,ko01110
Cmdn000784	C5H4N4O3	[M-H]-	Uric acid	Nucleotides and derivatives	Nucleotides and derivatives	69-93-2	44030.2	50435.6	47789.2	44269.9	52830.9	54483.5	44673.2	44732.9	48340.8	42221.6	28422.4	42324.8	-	-
Lmqn000780	C17H27N3O17P2	[M-H]-	Uridine 5'-diphospho-N-acetylglucosamine	Nucleotides and derivatives	Nucleotides and derivatives	528-04-1	64588.7	44024	49367.5	63352.8	56281	78863.8	81633.9	105773	76863.6	46685.1	54739.3	70650.2	C00043	ko00520,ko00524,ko01100,ko01250
Lmcp002302	C12H17N5O5	[M+H]+	N6-(2-Hydroxyethyl)adenosine*	Nucleotides and derivatives	Nucleotides and derivatives	4338-48-1	218438	332047	323870	221256	303209	237903	219699	283043	252348	183726	222830	281068	-	-
pme2651	C21H28N7O17P3	[M-H]-	NADP (Nicotinamide adenine dinucleotide phosphate)	Nucleotides and derivatives	Nucleotides and derivatives	53-59-8	116862	107608	212215	198169	216465	128807	143694	93875.6	215096	151706	200550	132867	C00006	ko00195,ko00480,ko00760,ko01100,ko01240
pme3968	C6H7N5O	[M+H]+	7-Methylguanine	Nucleotides and derivatives	Nucleotides and derivatives	578-76-7	71294	87159.9	47619.5	87100.9	78580.4	65983.9	60499.1	51754.6	73369	62388.1	62580.3	41204.8	C02242	-
Cmxp000455	C9H11N5O4	[M+H]+	Eritadenine	Nucleotides and derivatives	Nucleotides and derivatives	23918-98-1	89554	23528.7	24073.5	34498.7	56395.1	59517.6	55247.5	40010	76650.2	86314.7	97128	56577.9	-	-
pme1266	C6H6N4O2	[M+H]+	3-Methylxanthine	Nucleotides and derivatives	Nucleotides and derivatives	1076-22-8	106036	111611	73702.3	70580.5	37032.3	95709.4	115319	90534	115834	74586.4	96324.9	53930.6	C16357	ko00232,ko01100,ko01110
MWSslk257	C9H14N3O8P	[M+H]+	Cytidine 5'-monophosphate(Cytidylic acid)	Nucleotides and derivatives	Nucleotides and derivatives	63-37-6	64617.6	64281.6	61866.1	109432	137505	79820.7	228287	107713	193241	174034	96930.5	170013	C00055	ko00240,ko01100,ko01232
Wdtp002974	C18H21N5O6	[M+H]+	N-(p-hydroxybenzyl) adenosine	Nucleotides and derivatives	Nucleotides and derivatives	-	219662	136735	236011	4.19135e+06	1.73251e+06	3.01148e+06	2.81954e+06	2.12217e+06	2.28104e+06	2957060	1.73165e+06	1.35911e+06	-	-
mws0470	C4H6O4	[M-H]-	Methylmalonic acid	Organic acids	Organic acids	516-05-2	1.78158e+07	2.24246e+07	2.50236e+07	3.51218e+07	3.13971e+07	4.02931e+07	4.09287e+07	2.26811e+07	2.90937e+07	2.86918e+07	2.87064e+07	2.87569e+07	C02170	ko00240,ko00280,ko00640,ko01100
mws0281	C6H8O7	[M-H]-	Citric Acid	Organic acids	Organic acids	77-92-9	1.06232e+07	1.225e+07	1.34169e+07	1.13389e+07	1.13613e+07	1.19742e+07	1.30307e+07	1.26873e+07	1.17962e+07	1.25742e+07	1.26368e+07	1.26359e+07	C00158	ko00020,ko00250,ko00630,ko01100,ko01110,ko01200,ko01210,ko01230,ko01240
mws0924	C6H10O4	[M-H]-	2-Methylglutaric acid	Organic acids	Organic acids	617-62-9	794174	908285	695091	748497	643517	605683	664631	546065	641027	690571	683957	685152	-	-
Wasn001627	C11H20O9	[M-H]-	Glucosyl 2,3-Dihydroxy-2-Methylbutanoic Acid	Organic acids	Organic acids	-	1.78925e+07	5.26383e+07	3.35159e+07	2.60566e+07	1.02176e+07	1.84443e+07	2.1456e+07	1.88912e+07	1.78895e+07	2.34453e+07	2.29743e+07	2.31611e+07	-	-
Zmgn000217	C5H6O4	[M-H]-	Itaconic acid	Organic acids	Organic acids	97-65-4	686725	658211	805943	777491	724263	741387	614329	744548	558834	721318	732335	736749	C00490	ko00660,ko01100
MWS0811	C6H11NO2	[M+H]+	L-Pipecolic Acid	Organic acids	Organic acids	3105-95-1	1.09533e+07	3.20721e+07	3.69282e+07	7.56589e+06	7.95951e+06	5.54931e+06	9.90756e+06	1.07407e+07	7.95653e+06	1.5375e+07	1.53755e+07	1.57012e+07	C00408	ko00310,ko00960,ko01100,ko01110
pmb2826	C5H8O5	[M-H]-	L-Citramalic acid	Organic acids	Organic acids	6236-09-5	3.05359e+06	3.5128e+06	3.52768e+06	3.36128e+06	2.90663e+06	3.4129e+06	3.17374e+06	3.10991e+06	3.07915e+06	3.2538e+06	3.26048e+06	3.3277e+06	C02614	ko00660,ko01100
Lmgn003978	C8H14O2	[M-H]-	2-n-Propyl-2-pentenoic acid	Organic acids	Organic acids	60218-41-9	5.33597e+07	5.2965e+07	3.3282e+07	5.14635e+07	4.71997e+07	4.84886e+07	5.12008e+07	3.02868e+07	5.52384e+07	5.12287e+07	5.29986e+07	5.25007e+07	C16653	-
Wmzn000227	C6H10O4	[M-H]-	2,2-Dimethylsuccinic acid	Organic acids	Organic acids	597-43-3	416968	2.42144e+06	2.51839e+06	243743	270915	234890	277543	289521	181232	709296	687885	710406	-	-
mws0376	C4H4O4	[M-H]-	Fumaric acid	Organic acids	Organic acids	110-17-8	4.14498e+06	3.22178e+06	4.67912e+06	4.23321e+06	4.84288e+06	3.47582e+06	5.10016e+06	4.79179e+06	3.06493e+06	4.35913e+06	4.22051e+06	4.38022e+06	C00122	ko00020,ko00190,ko00220,ko00250,ko00350,ko00360,ko00620,ko00650,ko00760,ko01100,ko01110,ko01200
ML10176345	C7H8O5	[M-H]-	3-Dehydroshikimic acid	Organic acids	Organic acids	2922-42-1	2.35786e+06	1.89644e+06	1.40555e+06	2.71349e+06	3.24683e+06	2.84836e+06	3.20518e+06	2.98762e+06	3.26142e+06	2.62011e+06	2.57607e+06	2.68584e+06	C02637	ko00400,ko00999,ko01100,ko01110,ko01230,ko01240
Zmgn001448	C7H12O5	[M-H]-	2-Propylmalic Acid	Organic acids	Organic acids	-	530915	159104	120151	413799	640369	424033	343174	35010	271330	311512	321267	308598	C05994	ko00620
Wasn003258	C12H22O8	[M-H]-	Glucosyl 2-Hydroxy-4-Methylpentanoic Acid	Organic acids	Organic acids	-	9.71996e+06	2.38172e+07	1.97701e+07	1.21046e+07	6.75978e+06	1.24323e+07	19509340	8.71902e+06	1.16934e+07	1.2003e+07	1.1992e+07	1.15459e+07	-	-
mws0567	C5H11N3O2	[M+H]+	4-Guanidinobutyric acid	Organic acids	Organic acids	463-00-3	3.91663e+07	8.68877e+06	1.14549e+07	7.8324e+06	1.97111e+07	3.17339e+07	1.93124e+07	2.58703e+07	1.97366e+07	1.77819e+07	1.83481e+07	1.75093e+07	C01035	ko00330,ko01100
mws0237	C9H16O4	[M-H]-	Azelaic acid	Organic acids	Organic acids	123-99-9	8.47837e+06	8.23823e+06	8.46311e+06	8.07667e+06	7.87605e+06	7.44739e+06	8.14417e+06	8.38949e+06	8.40747e+06	8.21425e+06	7.96918e+06	8.35896e+06	C08261	-
Lcsn002137	C9H10O7S	[M-H]-	Homovanillic acid sulfate	Organic acids	Organic acids	38339-06-9	3.24414e+06	3.21858e+06	2.41536e+06	3.74069e+06	3.06078e+06	3.55417e+06	3.56987e+06	3.6663e+06	3.88262e+06	3.24073e+06	3.39625e+06	3.38489e+06	-	-
pmf0096	C2H2O4	[M-H]-	Oxalic acid	Organic acids	Organic acids	144-62-7	1.17853e+06	623350	827421	781429	1.03858e+06	938800	863063	488886	629186	787484	752692	793451	C00209	ko00230,ko00630,ko01100
mws0242	C8H14O4	[M-H]-	Suberic Acid	Organic acids	Organic acids	505-48-6	333093	312739	385806	339227	292264	295725	336772	250998	374660	351032	332360	350038	C08278	-
mws0972	C6H12O3	[M-H]-	6-Hydroxyhexanoic acid	Organic acids	Organic acids	1191-25-9	218061	147243	114457	205606	145972	215399	147204	146024	118570	159324	169399	164084	C06103	-
pme3096	C3H5NO4	[M-H]-	Aminomalonic acid	Organic acids	Organic acids	1068-84-4	667531	882392	917107	1.26694e+06	1.16901e+06	1.43716e+06	1.54461e+06	877381	1.0593e+06	1.05824e+06	1.01507e+06	1.07848e+06	C00872	-
Lmgn002091	C7H10O5	[M-H]-	2-Methyl-3-oxoadipic acid*	Organic acids	Organic acids	-	2.36751e+06	1.7879e+06	1.19307e+06	5.40646e+06	2.3092e+06	3.21388e+06	4.19548e+06	4.1617e+06	4.85187e+06	3.20966e+06	3.0117e+06	3.14769e+06	C18307	-
ML10197929	C4H9N3O2	[M-H]-	Creatine	Organic acids	Organic acids	57-00-1	1.16242e+06	912194	969758	850894	1.58152e+06	1.21419e+06	973571	964223	850729	1.00663e+06	978501	1.04614e+06	C00300	ko00260,ko00330,ko01100
pme0278	C7H14N2O4	[M+H]+	2,6-Diaminooimelic acid	Organic acids	Organic acids	583-93-7	474423	335708	280732	283437	495262	314963	323999	387287	412520	334644	336609	357454	C00666	ko00300,ko00470,ko01100,ko01110,ko01230
mws0341	C6H12O3	[M-H]-	2-Hydroxyisocaproic acid	Organic acids	Organic acids	20312-37-2	900244	638421	962127	600715	812198	639490	710337	300336	598562	649093	669580	698537	C03264	-
Lmgn000160	C4H8N2O3	[M-H]-	3-Ureidopropionic Acid	Organic acids	Organic acids	462-88-4	381324	1.17519e+06	1.21137e+06	214748	282394	281495	234996	222226	245545	439787	414037	443557	C02642	ko00240,ko00410,ko00770,ko01100
mws0336	C6H6N2O2	[M-H]-	Urocanic acid	Organic acids	Organic acids	104-98-3	1.87972e+06	656785	396628	1.13557e+06	2.0399e+06	918318	2.04721e+06	1.8651e+06	2.01759e+06	1.33504e+06	1.29816e+06	1.39954e+06	C00785	ko00340,ko01100
Lmbn001364	C5H8O4	[M-H]-	4-Hydroxy-2-Oxopentanoic Acid*	Organic acids	Organic acids	3318-73-8	260357	684362	387793	502663	206165	433953	332945	291050	338295	387085	359089	367681	C03589	ko00360,ko01100
mws0473	C5H8O4	[M-H]-	2-Methylsuccinic acid	Organic acids	Organic acids	498-21-5	3.02244e+06	6.73165e+06	4.11099e+06	5.62837e+06	2.28513e+06	4.70408e+06	3.33626e+06	2.76457e+06	3.65669e+06	3.98734e+06	3.7127e+06	3.95874e+06	-	-
pme0274	C6H13NO2	[M+H]+	6-Aminocaproic acid	Organic acids	Organic acids	60-32-2	8.81557e+06	2.53368e+07	4.39939e+07	2.79407e+07	1.35773e+07	2.35971e+07	2.99876e+07	2.45446e+07	2.38619e+07	2.37835e+07	2.20328e+07	2.3228e+07	C02378	ko01100
Lmyn004460	C15H20O4	[M-H]-	Abscisic acid	Organic acids	Organic acids	21293-29-8	38163.1	15553.1	132552	7776.24	38852.5	8034.24	9.31442e+06	6.34798e+06	4.10941e+06	2.38234e+06	2.22981e+06	2.22778e+06	C06082	ko00906,ko01100,ko01110,ko04075
MW0168990	C20H20N2O3	[M-H]-	CYCLOPIAZONIC ACID	Organic acids	Organic acids	18172-33-3	1.5329e+06	2.9897e+06	1.51112e+06	3.27016e+06	1.73146e+06	3.55081e+06	1.64142e+06	1.84462e+06	2.02545e+06	2.25107e+06	2.09365e+06	2.23653e+06	-	-
Lmbn001288	C5H8O4	[M-H]-	2-Hydroxy-2-methyl-3-oxobutanoic acid*	Organic acids	Organic acids	71698-08-3	287473	700505	455463	598259	241345	490891	362484	324592	369986	429172	419626	396856	C06010	ko00290,ko00650,ko00660,ko00770,ko01100,ko01110,ko01210,ko01230
mws0159	C9H8O3	[M-H]-	Phenylpyruvic acid	Organic acids	Organic acids	156-06-9	75550.6	46815	47417.5	504825	873553	868906	827970	617974	1.13496e+06	599576	578286	551577	C00166	ko00360,ko00400,ko00470,ko00960,ko01100,ko01110,ko01210,ko01230
pme2550	C6H6O6	[M-H]-	Cis-Aconitic acid	Organic acids	Organic acids	585-84-2	2.98139e+06	1.72092e+06	3.99621e+06	2.82081e+06	2.83083e+06	2.97688e+06	2.18826e+06	1.97733e+06	2.00344e+06	2.65392e+06	2.45672e+06	2.48916e+06	C00417	ko00020,ko00630,ko00660,ko01100,ko01110,ko01210
MWS3036	C5H8O5	[M-H]-	3-Hydroxyglutaric acid*	Organic acids	Organic acids	638-18-6	1.9211e+06	1.21856e+06	1.20082e+06	1.83344e+06	1.93852e+06	1.9758e+06	1.76515e+06	1.79997e+06	1.32569e+06	1.83293e+06	1.69825e+06	1.71539e+06	-	-
Zmtn001464	C10H7NO4	[M-H]-	4,8-Dihydroxyquinoline-2-carboxylic acid	Organic acids	Organic acids	59-00-7	4.23282e+06	6.03465e+06	4.35564e+06	7.40944e+06	3.57819e+06	6.52222e+06	4.49169e+06	3.92486e+06	3.52348e+06	4.40038e+06	4.30766e+06	4.67636e+06	C02470	ko00380
mws0275	C4H6O5	[M-H]-	L-Malic acid	Organic acids	Organic acids	97-67-6	3.37094e+06	3.02736e+06	4.11332e+06	3.44216e+06	3.6135e+06	3.14566e+06	3.54442e+06	3.46549e+06	2.34256e+06	3.1998e+06	3.48952e+06	3.26777e+06	C00149	ko00020,ko00620,ko00630,ko00710,ko01100,ko01110,ko01200
Cmsn004064	C9H12O4	[M-H]-	Decumbic acid	Organic acids	Organic acids	390401-25-9	197862	19181.1	19772.4	76712.1	175197	179557	73752.2	96008.8	25765.4	84643.2	92299.3	86308.1	-	-
pmb3101	C7H12O5	[M-H]-	2-Isopropylmalic Acid	Organic acids	Organic acids	49601-06-1	607126	50015	106361	473017	783096	493819	443527	275187	300041	397642	367306	398652	C02504	ko00290,ko00620,ko01100,ko01110,ko01210,ko01230
pme1654	C12H18O3	[M-H]-	Jasmonic acid	Organic acids	Organic acids	77026-92-7	813744	118518	55483.7	165719	26003.6	119514	79242	84857.3	160220	139710	151795	151213	C08491	ko00592,ko01100,ko01110,ko04075
mws0277	C7H12O6	[M-H]-	Quinic Acid	Organic acids	Organic acids	77-95-2	2.39091e+06	3.35164e+06	3.3959e+06	3.01202e+06	2.94086e+06	2.61731e+06	2.87031e+06	2.87014e+06	2.81113e+06	2.9079e+06	2.6674e+06	2.70292e+06	C00296	ko00400,ko01100
pme2362	C8H8O3	[M-H]-	Mandelic acid	Organic acids	Organic acids	90-64-2	3.97387e+06	4.13411e+06	2.58358e+06	3.38835e+06	2.23635e+06	3.21537e+06	3.3121e+06	3.55363e+06	4.28833e+06	2.76359e+06	3.02578e+06	2.81569e+06	C01984	-
mws0147	C5H10O3	[M-H]-	β-Hydroxyisovaleric acid	Organic acids	Organic acids	625-08-1	1.42314e+06	702865	859900	1.84881e+06	1.52093e+06	2.80666e+06	1.159e+06	1.77652e+06	728510	1.59084e+06	1.70708e+06	1.55064e+06	C20827	ko00280,ko01100
Lmmn003323	C16H32O3	[M-H]-	2-Hydroxyhexadecanoic acid	Organic acids	Organic acids	764-67-0	1.60731e+06	1.39011e+06	1.46364e+06	1.30824e+06	1.30372e+06	1.3138e+06	1.51624e+06	1.31239e+06	1.87003e+06	1.50202e+06	1.47018e+06	1.36039e+06	-	-
Lmrn002746	C6H12O3	[M-H]-	2-Hydroxy-4-methylpentanoic acid	Organic acids	Organic acids	498-36-2	106487	62756.9	133724	62274.7	85425.5	76147.5	93003	41263.8	74372.9	72074.8	80315.3	75622	-	-
mws2125	C3H5O6P	[M-H]-	Phosphoenolpyruvate	Organic acids	Organic acids	138-08-9	762100	524973	768665	725533	892958	755587	681660	827292	772219	763267	851029	805582	C00074	ko00010,ko00020,ko00400,ko00440,ko00620,ko00710,ko00996,ko00999,ko01100,ko01110,ko01200,ko01230,ko01240
MWS2040	CH4O3S	[M-H]-	Methanesulfonic acid	Organic acids	Organic acids	75-75-2	96324.9	96292.6	94132.5	73493	92369.2	91762.8	49683.4	65580.9	91372.9	95810	90849.5	85895.9	C11145	ko00920,ko01100
pme0220	C13H20O3	[M+H]+	Methyl jasmonate	Organic acids	Organic acids	1211-29-6	767977	197988	397994	374390	495159	291797	73145.9	192629	284370	357553	323296	328032	C11512	ko00592,ko01110
pme3154	C6H12O4	[M-H]-	Mevalonic acid	Organic acids	Organic acids	150-97-0	912233	694494	671886	814251	931717	927060	1.09141e+06	919664	985479	982727	879304	936507	C00418	ko00900,ko01100,ko01110
Wasn003197	C13H24O9	[M-H]-	3-(Beta-D-Glucopyranosyloxy)-5-Hydroxyhexanoic Acid Methyl Ester	Organic acids	Organic acids	-	617328	1.06935e+06	855432	655421	453010	574260	1664680	638579	769852	726695	654342	727858	-	-
MWS4285	C3H6O3	[M-H]-	L-Lactic Acid	Organic acids	Organic acids	79-33-4	90545.1	50733.5	69405	82905.1	93539.9	75745.8	68428.2	41782.4	60077.6	72685.3	72008.8	64938.1	C00186	ko00010,ko00051,ko00620,ko00640,ko01100,ko01110
mws0262	C4H6O6	[M-H]-	L-Tartaric acid	Organic acids	Organic acids	87-69-4	275268	149620	221570	343616	276929	318317	301773	178682	237416	288308	255080	279296	C00898	ko00630,ko01100
Zmyn000453	C6H8O7	[M-H]-	Isocitric Acid	Organic acids	Organic acids	320-77-4	5.03421e+06	4.8889e+06	5.24456e+06	5.06001e+06	4.54533e+06	4.66387e+06	4.12601e+06	4.98703e+06	4.13592e+06	4.60615e+06	5.04448e+06	4.46873e+06	C00311	ko00020,ko00630,ko01100,ko01110,ko01200,ko01210,ko01230,ko01240
mws0267	C3H6O4	[M-H]-	DL-Glyceric Acid	Organic acids	Organic acids	473-81-4	205155	304487	149470	392210	556573	301990	271930	250225	213500	357120	325375	370485	C00258	ko00030,ko00260,ko00561,ko00630,ko01100,ko01110,ko01200
pme3011	C4H9NO2	[M+H]+	γ-Aminobutyric acid	Organic acids	Organic acids	56-12-2	1.66017e+06	1.23555e+06	1.27362e+06	900967	568396	809536	680394	449046	558237	927927	916531	819083	C00334	ko00250,ko00330,ko00410,ko00650,ko00760,ko01100
Lmjp002931	C10H13NO2	[M+H]+	Fusaric acid	Organic acids	Organic acids	-	459214	1.03128e+06	567613	934895	988024	856645	835289	845002	743740	794637	765521	693029	-	-
Lmyn002403	C14H18O8	[M-H]-	Mandelic acid-β-glucoside	Organic acids	Organic acids	-	218527	310669	255111	280604	272627	275460	228306	181707	201601	245994	213241	233094	-	-
MWSslk113	C12H10O3	[M+H]+	6-Methoxy-2-naphthoic acid	Organic acids	Organic acids	2471-70-7	172738	163201	398342	156811	179296	268890	178593	224741	150571	152116	150659	171658	-	-
Lmfn006097	C10H16O3	[M-H]-	Oleuropeic acid	Organic acids	Organic acids	5027-76-9	58063.1	38820.1	58100.8	31823.5	45846.4	43172	41870	22929.1	31552.3	46125.7	39720.4	42136	-	-
pme1730	C4H6O4	[M-H]-	D-Erythronolactone	Organic acids	Organic acids	15667-21-7	3.6405e+06	1.44582e+06	857350	2.85173e+06	3.55757e+06	2.58727e+06	2.80343e+06	1.81748e+06	2.46652e+06	2.51404e+06	2.77559e+06	2.39432e+06	-	-
MWSmce536	C6H6O3	[M-H]-	Methyl 2-furoate	Organic acids	Organic acids	611-13-2	496774	517772	80137	474077	413914	463821	731655	314948	571229	435206	374383	423789	-	-
MW0106680	C10H16N2O8	[M-H]-	Edetic acid	Organic acids	Organic acids	62-33-9	3.88298e+06	2.54241e+06	2.86081e+06	3.53188e+06	3.92092e+06	4.30393e+06	3.64787e+06	3.58311e+06	3.06817e+06	2.99358e+06	3.47128e+06	3.43752e+06	C00284	-
pme3017	C4H9NO2	[M+H]+	2-Aminoisobutyric acid	Organic acids	Organic acids	62-57-7	2.06965e+06	7.00228e+06	1.50202e+06	1.61491e+06	1.55925e+06	2.01252e+06	1.87353e+06	1.75274e+06	2.28094e+06	2.65592e+06	2.68779e+06	2.31498e+06	C03665	-
WaYn000716	C18H28O17	[M-H]-	Citric Acid diglucoside	Organic acids	Organic acids	-	437456	435621	746573	261129	406864	263263	326424	588847	407052	346893	373574	317279	-	-
Lcsn000415	C9H16O9	[M-H]-	Keto-Deoxy-Nonulonic acid	Organic acids	Organic acids	153666-19-4	835700	2293325	1.07391e+06	643712	734677	797915	843037	703073	756526	704833	824140	727590	C20934	ko00520,ko01100,ko01250
mws0832	C10H16N4O3	[M+H]+	2-(4-Aminobutanamido)-3-(1-methyl-1H-imidazol-5-yl)propanoic acid	Organic acids	Organic acids	584-85-0	59953.1	30748.5	39798.4	39810.7	32202	50548.4	62844	65206.1	71477.1	53244.4	45362.4	47099.1	C01262	ko00340,ko00410,ko01100
Lmbn001467	C7H13NO3	[M-H]-	5-Acetamidopentanoic Acid	Organic acids	Organic acids	1072-10-2	245244	305161	421396	320542	299588	352595	326554	261559	262199	299700	253074	267394	C03087	ko00310,ko01100
pme3207	C6H6O4	[M-H]-	Muconic acid	Organic acids	Organic acids	1119-72-8	6.84924e+06	1.71865e+07	1.71897e+07	6.87326e+06	6.88648e+06	6.86862e+06	2.24821e+07	6.86741e+06	5.65791e+06	7.3019e+06	8.57773e+06	7.39543e+06	C02480	ko01100
pme3009	C6H6O6	[M+H]+	trans-Aconitic acid	Organic acids	Organic acids	4023-65-8	2.59953e+06	2.16908e+06	2.51374e+06	2.29147e+06	2.20147e+06	2.34854e+06	2.3446e+06	2.21651e+06	2.00084e+06	2.14596e+06	2.49839e+06	2.12335e+06	C02341	ko00660,ko01100
MWS4396	C11H8O3	[M-H]-	1-Hydroxy-2-Naphthoic Acid	Organic acids	Organic acids	86-48-6	114578	127840	104180	115587	112316	109543	112675	114757	110595	118902	112683	97091.6	C03203	ko01100
Zmgn000503	C5H10O4	[M-H]-	2,3-Dihydroxy-3-Methylbutanoic Acid	Organic acids	Organic acids	1756-18-9	8.07894e+06	4.62251e+06	1.17355e+07	9.14573e+06	1.90058e+06	6.99458e+06	8.86251e+06	8.3732e+06	5.6971e+06	1.16788e+07	9.7357e+06	9.76402e+06	C04039	-
Zmln000282	C6H8O8	[M-H]-	Hibiscus acid	Organic acids	Organic acids	6205-14-7	362316	314154	404721	375380	341471	354067	389610	360607	424766	350755	388386	436758	-	-
pme3034	C5H8O4	[M-H]-	Ethylmalonic acid	Organic acids	Organic acids	601-75-2	82414.6	119058	22486.1	190778	208894	311937	149250	60958.8	92978.2	124826	155122	135222	-	-
Wayn000597	C18H28O17	[M-H]-	Citric acid-1-O-diglucoside	Organic acids	Organic acids	-	85430	148229	180325	65377.5	125969	65334.6	66456.9	98090	83318.7	100781	85959.7	108039	-	-
mws0154	C7H10O5	[M-H]-	Shikimic acid	Organic acids	Organic acids	138-59-0	9.62578e+06	1.91247e+06	1.13369e+06	4.48033e+06	9.61366e+06	3.42975e+06	8.14677e+06	8.15667e+06	8.41345e+06	5.04694e+06	5.0606e+06	6.1394e+06	C00493	ko00400,ko00996,ko00999,ko01100,ko01110,ko01230,ko01240
Zmdp000917	C6H13N3O2	[M+H]+	δ-Guanidinovaleric acid	Organic acids	Organic acids	462-93-1	154894	143987	145170	136113	165234	191780	85204.1	108343	94120.2	153356	128073	160584	-	-
pme3186	C3H7O6P	[M-H]-	DL-Glyceraldehyde-3-phosphate	Organic acids	Organic acids	591-59-3	398790	291117	182819	344950	581692	269343	282209	502641	307000	373638	312276	394694	C00661	-
mws4052	C4H7NO2	[M+H]+	1-Aminocyclopropane-1-carboxylic acid	Organic acids	Organic acids	22059-21-8	578377	1.11631e+06	1.01694e+06	556088	488618	450122	459216	466649	468383	720317	680228	567862	C01234	ko00270,ko01100,ko01110
pme2601	C3H6O3	[M-H]-	3-Hydroxypropanoic acid	Organic acids	Organic acids	503-66-2	80996.7	61456.4	95474.6	81737	104816	74462.3	93590.1	97252.1	63475.3	91884.1	75106.5	74477.9	C01013	ko00240,ko00410,ko00640,ko01100,ko01200
MWS2417	C8H8O4	[M-H]-	3-Hydroxymandelate	Organic acids	Organic acids	17119-15-2	55348.8	20843.8	26884.8	91067.2	85992.2	84546.6	81166.7	57903.8	50867	49036.2	61258.5	61581.2	-	-
MWSslk147	C7H7O6P	[M+H]+	Fosfosal	Organic acids	Organic acids	6064-83-1	109016	122414	114426	97394.2	66097.6	101311	83741.5	77138.3	86606.9	88988.7	93969.8	114179	-	-
mws2124	C2H5O6P	[M-H]-	2-Phosphoglycolate	Organic acids	Organic acids	13147-57-4	142427	110247	172265	185940	176545	189518	175126	190159	204337	113239	149510	131724	-	-
Lmgn000242	C6H10O6	[M-H]-	4,5,6-Trihydroxy-2-oxohexanoic acid	Organic acids	Organic acids	56742-44-0	79116.8	164438	129155	89634.7	86702.9	73733.7	98782.8	102772	84336.1	74315.8	83126	97585.1	C01216	ko00052,ko01100
mws0236	C2H7NO3S	[M-H]-	2-Aminoethanesulfonic acid	Organic acids	Organic acids	107-35-7	44252.6	39523.6	37968.7	38499.3	74879.3	26867.9	29503.3	40600.7	49601.9	54837.5	44291.6	42728.2	C00245	ko00430,ko00920,ko01100,ko02010
MW0168280	C11H12O7	[M-H]-	(2S,3R)-2,3-dihydroxy-2-[(4-hydroxyphenyl)methyl]butanedioic acid	Organic acids	Organic acids	35388-57-9	73252.7	91556.7	85739.1	86059.2	57364.8	90221	90824.3	43171.4	83365	39327.9	44542.6	52132.2	-	-
MWS4533	C9H10O2	[M-H]-	2-Phenylpropionic Acid*	Organic acids	Organic acids	7782-26-5	152009	40291.7	118715	96792.3	126960	42377.4	73349.6	92644.7	127659	74879.6	92923.6	99243.1	-	-
pme2380	C5H6O5	[M-H]-	α-Ketoglutaric acid	Organic acids	Organic acids	328-50-7	382376	244551	316983	434246	484309	426649	391067	404735	353521	460266	339729	396283	C00026	ko00020,ko00040,ko00053,ko00220,ko00250,ko00300,ko00310,ko00340,ko00430,ko00470,ko00630,ko00650,ko00660,ko00785,ko01100,ko01110,ko01200,ko01210,ko01230,ko01240
Zmyn002323	C8H8O3	[M-H]-	2-Hydroxyphenylacetic acid	Organic acids	Organic acids	614-75-5	29383.1	41077.9	69830.8	51043.3	54843.9	75079.1	42134	46680	49267.8	82919	69824.3	60937	C05852	ko00360,ko01100
Wayn000918	C18H28O17	[M-H]-	Isocitric acid-1-O-diglucoside	Organic acids	Organic acids	-	22859.6	47104.6	36322.4	26846.1	40865	29710.4	19862.3	25147.8	32947.6	28925.5	22592.9	30862.3	-	-
MWS1837	C8H15NO2	[M+H]+	Tranexamic Acid	Organic acids	Organic acids	1197-18-8	1.54717e+06	1.1444e+06	1.55683e+06	1.15833e+06	1.04672e+06	1.23722e+06	774963	828572	941226	1.29357e+06	1.03866e+06	958663	-	-
MW0013542	C6H10O6	[M+CH3COO]-	2-Keto-3-deoxygluconate	Organic acids	Organic acids	17510-99-5	1.78042e+07	68591390	70530965	51443915	49237035	2.27375e+07	95367225	1.13503e+07	2.08359e+07	49391215	66497630	51695905	C00204	ko00030,ko00040,ko01100,ko01200
MWS2041	C6H6O3	[M-H]-	2,3-Dimethylmaleic anhydride	Organic acids	Organic acids	766-39-2	93552.2	98955.3	56965	59498.7	91144.3	66571.5	104546	92952.6	97920.8	73723.9	90672.6	64159.8	-	-
Lmgn000224	C5H6O5	[M-H]-	2-Methyl-3-oxosuccinic acid	Organic acids	Organic acids	-	78330.3	25814	65020	93971.2	72223.2	99368	67435.6	65232.4	89846.5	58480.5	42148.1	58482.1	C06030	ko00660
MWS1798	C6H8O2	[M+H]+	2,4-Hexadienoic acid	Organic acids	Organic acids	110-44-1	175641	129043	203027	193102	157157	153196	159309	155970	80553.9	190298	130235	180341	-	-
pme2761	C5H6O6	[M-H]-	4-Hydroxy-2-oxoglutaric acid	Organic acids	Organic acids	1187-99-1	541361	367258	512451	569372	542580	480914	511134	707231	556408	477416	473214	686975	C01127	ko00630,ko01100
pme1936	C4H7N3O	[M+H]+	Creatinine	Organic acids	Organic acids	60-27-5	1.21628e+06	575424	720165	692359	1.00203e+06	717427	528901	1.10126e+06	648839	969123	1.07126e+06	677462	C00791	ko00330,ko01100
MW0106444	C19H21N7O6	[M+Na]+	Dihydrofolic acid	Organic acids	Organic acids	4033-27-6	8508625	2.18306e+07	27687385	12337725	9461040	12335910	11476570	10246055	10548685	9.80913e+06	16281535	15667965	C00415	ko00670,ko00790,ko01100,ko01240
pme1974	C3H4O3	[M-H]-	Pyruvic acid	Organic acids	Organic acids	127-17-3	80195.5	115141	77317.7	101945	96877.6	80761.1	54693.9	78757.7	63335.1	70426.8	106915	69766.2	C00022	ko00010,ko00020,ko00030,ko00040,ko00053,ko00250,ko00260,ko00261,ko00270,ko00290,ko00330,ko00350,ko00360,ko00430,ko00440,ko00470,ko00620,ko00630,ko00650,ko00660,ko00710,ko00730,ko00760,ko00770,ko00785,ko00900,ko01100,ko01110,ko01200,ko01210,ko01230,ko01240
pmb3059	C19H28O18	[M-H]-	Quinic acid O-di-glucuronic acid	Organic acids	Organic acids	-	80248	144269	130419	178280	87635.9	86474.4	164648	134562	177423	175568	105056	127464	-	-
Lmgn002184	C7H10O5	[M-H]-	2-Oxoheptanedionic acid*	Organic acids	Organic acids	17126-90-8	580030	571023	316101	670856	844031	510059	1.07623e+06	684101	606582	804269	818327	487181	C16588	ko01100,ko01210,ko01240
Lmbn001609	C6H10O4	[M-H]-	2-Acetyl-2-Hydroxybutanoic Acid	Organic acids	Organic acids	-	118133	52432	67265.9	66513	93057.8	81591.7	58735.1	56326.4	83063.3	97182	61649.6	110114	C06006	ko00290,ko01100,ko01110,ko01210,ko01230
MWS0274	C9H10O3	[M-H]-	DL-3-Phenyllactic acid	Organic acids	Organic acids	828-01-3	6879.38	6670	16675	20005	53350	21946.2	17345.2	24395.5	53481.8	24049.8	14379.4	26033.7	-	-
pme1216	C6H5NO2	[M-H]-	2-Picolinic acid	Organic acids	Organic acids	98-98-6	46034.5	56125.4	29618.5	51405.4	46246.7	94297.8	69251.6	33717.8	44422.3	35160.6	59374.9	39310.6	C10164	ko00380,ko01100
Hmhn002738	C5H4O3	[M-H]-	3-Furoic acid	Organic acids	Organic acids	488-93-7	360711	358540	374377	394434	377131	430709	464091	371840	418222	387867	368654	216070	-	-
Lmyp102101	C5H4O3	[M+H]+	3-Hydroxy-4H-pyran-4-one	Organic acids	Organic acids	-	154282	45964.4	97687.8	124791	159303	76665.8	279136	70049.4	72776.7	90292.7	75536.9	132993	-	-
Lmsn015919	C6H18O24P6	[M-H]-	Phytic acid	Organic acids	Organic acids	83-86-3	251985	230793	141903	239730	239937	132626	238860	131484	237439	133220	246614	243141	C01204	ko00562,ko01100,ko04070
MWSslk154	C12H20O7	[M+H]+	Triethyl citrate	Organic acids	Organic acids	77-93-0	215688	368042	233516	113981	150605	70103.6	76627.5	89170.6	134539	172045	114052	225686	-	-
mws1598	C3H9NO3S	[M-H]-	3-Amino-1-propionic sulfonic acid	Organic acids	Organic acids	3687-18-1	15277	11074.9	16346	4746.16	7906.32	8970.27	8073.26	5272.64	1670	9483.16	16598.3	9972.34	-	-
pmf0175	C10H22O	[M-H]-	2-Decanol*	Others	Alcohol compounds	1120-06-5	3.15143e+07	2.93389e+07	3.06651e+07	2.83746e+07	2.82926e+07	2.66632e+07	2.87482e+07	2.71337e+07	2.9048e+07	2.85492e+07	2.84155e+07	2.81684e+07	-	-
pmf0174	C10H22O	[M-H]-	1-Decanol*	Others	Alcohol compounds	112-30-1	3.01867e+07	2.81372e+07	2.99501e+07	2.69308e+07	2.75513e+07	2.58539e+07	2.70589e+07	2.57063e+07	2.8703e+07	2.77331e+07	2.75343e+07	2.7242e+07	C01633	-
Lasp003143	C11H12O3	[M+H]+	1,4-Benzodioxin-6-propanol	Others	Alcohol compounds	-	2.07945e+06	2.38523e+06	2.87181e+06	2.20352e+06	3.53562e+06	1.67408e+06	2.46949e+06	2.13492e+06	1.99171e+06	2.34287e+06	2.38445e+06	2.34462e+06	-	-
pmn001380	C9H16O4	[M-H]-	Eucommiol	Others	Alcohol compounds	55930-44-4	726753	689905	711434	773179	707290	676588	760016	704092	712147	733922	720420	721846	C17878	-
Lmqp006559	C20H43NO2	[M+H]+	2-Amino-1,3-eicosanediol	Others	Alcohol compounds	-	1.09932e+06	2.12458e+06	2.30955e+06	924705	895922	514820	3.16589e+06	750231	678798	7.72255e+06	7.84439e+06	7.63422e+06	-	-
pmf0348	C10H20O3	[M-H]-	2,6-Dimethyl-7-octene-2,3,6-triol	Others	Alcohol compounds	73815-21-1	938456	789439	767500	849286	795038	902772	753304	884178	986319	797271	863275	813757	-	-
Hmsp004125	C16H14O6	[M+H]+	3'-Deoxy-4-O-methylsappanol	Others	Alcohol compounds	-	2.85462e+06	2.62081e+06	2.67259e+06	3.73969e+06	3.85913e+06	4.2514e+06	4.08732e+06	3.38892e+06	3.21326e+06	3.00896e+06	3.46129e+06	3.21534e+06	-	-
Lmzp003207	C16H28O7	[M+H]+	(3R,4R)-p-Menth-1-ene-3,4-diol-3-O-β-D-glucoside*	Others	Alcohol compounds	-	2.67411e+07	2.72952e+07	2.40818e+07	2.61775e+07	2.91466e+07	2.78065e+07	2.98193e+07	2.84573e+07	2.9672e+07	2.23777e+07	2.84858e+07	25467790	-	-
Lmzp003064	C16H28O7	[M+H]+	(3R,4S,6R)-p-Menth-1-ene-3,6-diol-3-O-β-D-glucoside*	Others	Alcohol compounds	-	2.67411e+07	2.72952e+07	2.40818e+07	2.61775e+07	2.91466e+07	2.78065e+07	2.98193e+07	2.84573e+07	2.9672e+07	2.23777e+07	2.84858e+07	25467790	-	-
pme1261	C9H19NO4	[M+H]+	D-Panthenol	Others	Alcohol compounds	81-13-0	196987	154217	138035	287381	185966	162038	147749	224905	1.21624e+06	195807	311513	245142	C05944	ko00770
Zmdp000376	C5H11N3O	[M+H]+	4-Guanidinobutanal	Others	Aldehyde compounds	-	1.7044e+06	8.61817e+06	8.03126e+06	1.58017e+06	1.81163e+06	1.28176e+06	1.94979e+06	2.20081e+06	1.6161e+06	3.85401e+06	3.63471e+06	3.57789e+06	-	-
mws0458	C8H8O3	[M-H]-	Vanillin; 4-Hydroxy-3-Methoxybenzaldehyde	Others	Aldehyde compounds	121-33-5	394470	352491	319694	276790	372065	245614	340840	278672	351970	312018	292817	321353	C00755	ko00996,ko01100,ko01110
MWSmce040	C8H8O3	[M+H]+	Isovanillin	Others	Aldehyde compounds	621-59-0	407569	284969	218565	386932	340481	364528	332399	302903	317606	332399	303892	330910	-	-
pmf0440	C10H10O2	[M+H]+	4-MethoxycinnaMaldehyde	Others	Aldehyde compounds	1963-36-6	2.83718e+06	2.73238e+06	2.63987e+06	2.78664e+06	2.68406e+06	2.49728e+06	2.53472e+06	2.46984e+06	2.45976e+06	2.70169e+06	2.50453e+06	2.44794e+06	C10475	-
mws0628	C7H6O2	[M-H]-	4-Hydroxybenzaldehyde	Others	Aldehyde compounds	123-08-0	427332	314375	353369	454525	394492	487091	473872	326847	509526	415208	402638	448054	C00633	ko01100
MWS20172	C6H6O3	[M+H]+	5-Hydroxymethylfurfural*	Others	Aldehyde compounds	67-47-0	589189	676975	454759	1.59836e+06	478512	693746	777086	878685	925215	825184	766948	728721	C11101	-
MWSCX017	C9H8O3	[M+H]+	4-hydroxyphenyl acrylaldehyde	Others	Aldehyde compounds	-	909369	1.23618e+06	1.25335e+06	1.2725e+06	1.14972e+06	1.13743e+06	1.02909e+06	861062	972443	1.12437e+06	986770	1.02707e+06	-	-
Zahp007439	C10H8O3	[M+H]+	3,4-Methylenedioxycinnamaldehyde	Others	Aldehyde compounds	58095-77-5	861305	414471	607636	501536	690354	526024	519638	441006	397912	526825	463938	449974	-	-
Lmbn002737	C8H8O	[M-H]-	3-Methylbenzaldehyde	Others	Aldehyde compounds	620-23-5	134921	120920	125465	116269	22613.3	114109	100227	63041.3	142341	113051	136438	132250	C07209	ko01100
MWSHC20158	C6H6O3	[M+H]+	5-Methoxyfurfural*	Others	Aldehyde compounds	21300-07-2	622221	719852	473149	1.45197e+06	527653	660962	730767	810299	935240	848383	741412	661166	-	-
MWSHC2067	C7H6O3	[M+H]+	Protocatechualdehyde	Others	Aldehyde compounds	139-85-5	2.04242e+07	1.03757e+07	1.04187e+07	1.22064e+07	24452390	1.66951e+07	1.52917e+07	1.58211e+07	1.37619e+07	1.32256e+07	1.27031e+07	1.60617e+07	C16700	ko00950
mws1350	C9H10O4	[M-H]-	Syringaldehyde; 4-Hydroxy-3,5-Dimethoxybenzaldehyde	Others	Aldehyde compounds	134-96-3	62481.9	58201.2	99659.9	51228.5	94381.3	30624.6	72160.6	100362	57939.1	63127.9	80701.5	63566.6	-	-
Lmbn005172	C9H10O3	[M-H]-	2,6-Dimethoxybenzaldehyde	Others	Aldehyde compounds	3392-97-0	87876.5	181790	66189.3	83656.1	191800	102785	191800	67928.6	101681	67930.3	100040	59352.7	-	-
Lmbn001981	C7H6O3	[M-H]-	2,5-Dihydroxybenzaldehyde	Others	Aldehyde compounds	1194-98-5	437340	289001	285650	2.2806e+06	1.36476e+06	1.21814e+06	1.58187e+06	1.65557e+06	851083	1.04879e+06	608732	622464	C05585	ko00350,ko01100
Hmyn000254	C18H18O4	[M-H]-	Tababiphenyl C	Others	Chromone	1644433-50-0	1.85998e+06	1.83872e+06	1.05491e+06	1.9169e+06	1.09092e+06	2.49344e+06	1.2854e+06	1.31945e+06	1.64446e+06	1.34797e+06	1.41903e+06	1.40829e+06	-	-
Lmbp004842	C18H20O6	[M+H]+	Rel-(5R,6S,7R)-5,6,7,8-Tetrahydro-5,6,7-trihydroxy-2-[2-(4-methoxyphenyl)ethyl]-4H-1-benzopyran-4-one	Others	Chromone	-	387797	175831	636007	234134	794438	772351	676622	383444	691812	611903	585234	623337	-	-
Latp003004	C19H22O9	[M+H]+	2-Methyl-5-acetonyl-7-hydroxychromone glucoside	Others	Chromone	-	1.83508e+06	1.28314e+06	2.34811e+06	3.63878e+06	3.91304e+06	4.11926e+06	3.35133e+06	3.25654e+06	3.39468e+06	2.8283e+06	2.89921e+06	3.01861e+06	-	-
pmp000971	C16H12O6	[M+H]+	6-Demethoxy-7-methylcapillarisin	Others	Chromone	-	284432	245988	209343	409538	521214	749766	371837	456274	467811	444643	408493	411759	-	-
Hmyp002315	C15H10O7	[M+H]+	3,5,7,4'-Tetrahydroxy-Coumaronochromone	Others	Chromone	-	6.1416e+07	6.68981e+07	5.30122e+07	7.85389e+07	7.44337e+07	8.72035e+07	8.83758e+07	8.23796e+07	65374563	6.97681e+07	7.35745e+07	7.77936e+07	-	-
Smnp001524	C16H18O9	[M+H]+	8-C-glucosyl-noreugenin	Others	Chromone	-	312439	787175	753660	268466	921310	397232	611315	572820	626380	656515	743610	684980	-	-
zjbp110810	C18H16O6	[M+H]+	6,8-dihydroxy-2-[2-(3'-hydroxy-4'-methoxyphenyl)ethyl]chromone	Others	Chromone	-	206698	163544	202069	335762	219756	398725	259647	291788	261160	262270	235589	266037	-	-
Latp002963	C19H22O10	[M+H]+	5-Acetonyl-6-glucosyl-7-hydroxy-2,6-methylchromone	Others	Chromone	-	21436485	2.42761e+07	32239580	26545000	22244475	25848925	30932050	32446495	40487075	28496755	31909090	34910995	-	-
Zmzp006646	C16H12O7	[M+H]+	Capillarisin	Others	Chromone	56365-38-9	1.78714e+06	1.91861e+06	2.63156e+06	1.65358e+06	2.42058e+06	2.21796e+06	3.02284e+06	3.92821e+06	3.80455e+06	3.04219e+06	2.56034e+06	3.21265e+06	C08999	-
zjbp110804	C20H20O6	[M+H]+	6,7-dimethoxy-2-[2-(4'-hydroxy-3'-methoxyphenyl)ethyl]chromone	Others	Chromone	-	124877	29333.7	173689	21834.4	99268	34979.8	150603	41509.7	22752.9	134940	107451	115165	-	-
Yalp002169	C16H18O9	[M+H]+	Schumanniofioside A	Others	Chromone	128396-15-6	860068	707781	648885	1.90847e+06	1.66031e+06	11301695	1.87727e+06	2771720	6160480	3485480	2284855	4362495	-	-
Lasp003640	C9H10O4	[M+H]+	2,4-Dihydroxy-6-methoxyacetophenone	Others	Ketone compounds	3602-54-8	377155	548177	507066	226252	615255	596019	492386	610501	462737	525042	503407	504265	-	-
Layp002880	C15H16O9	[M+H]+	5,7-Dihydroxychromone glucoside	Others	Ketone compounds	-	1.2963e+06	1.11791e+06	1.33424e+06	2.86241e+06	1.74004e+06	2.36053e+06	2.31679e+06	2.13247e+06	2.10772e+06	1.65877e+06	1.66946e+06	1.75106e+06	-	-
Wbtn006053	C24H20O9	[M-H]-	9-hydroxy-2-(2-hydroxy-3-methoxyphenyl)-3-(hydroxymethyl)-12-methoxy-2,3-dihydro-1,4,5-trioxatetraphen-10-one	Others	Ketone compounds	-	9.05741e+06	5.36356e+06	4.83936e+06	6.08005e+06	8.47999e+06	9.65559e+06	4.66143e+06	8.51871e+06	6.93166e+06	6.60459e+06	6.2785e+06	6.79969e+06	-	-
MWSmce466	C8H8O2	[M-H]-	4-Hydroxyacetophenone	Others	Ketone compounds	99-93-4	89684	41552.4	77925	112703	55205.4	64885.2	104148	88690.4	147647	86698.3	79057.4	81317.8	C10700	ko01100
Ljmp121505	C15H18O3	[M+H]+	Mansonone S	Others	Ketone compounds	-	126842	79414.7	430190	131563	162093	123722	1.24728e+07	7.81347e+06	4.9308e+06	2.85484e+06	2.69714e+06	2.56541e+06	-	-
Wbmp003302	C10H12O2	[M+H]+	Frambinone	Others	Ketone compounds	-	6.64102e+06	4.66935e+06	4.57593e+06	4.28949e+06	5.85173e+06	5.50703e+06	4.96366e+06	4.85069e+06	4.05832e+06	5.3039e+06	5.89772e+06	5.91434e+06	-	-
Zmgp004297	C19H20O2	[M+H]+	1-phenyl-7-(4-hydroxyphenyl)-4-ene-3-heptanone	Others	Ketone compounds	-	974561	948259	923876	774988	630226	710990	880858	825405	848414	491586	452437	430005	-	-
mws1622	C15H22O	[M+H]+	α-Cyperone	Others	Ketone compounds	473-08-5	2.01037e+06	847770	1.68141e+06	1.50353e+06	1.5061e+06	1.27725e+06	1.79467e+06	2.0142e+06	1.71076e+06	1.61084e+06	1.51194e+06	1.40087e+06	C17090	-
Wbtp003341	C15H14O6	[M+H]+	(3,5-dihydroxyphenyl)-(4-hydroxy-2,6-dimethoxyphenyl)methanone	Others	Ketone compounds	-	4.33936e+06	1.64482e+06	2.26961e+06	2.62905e+06	4.37799e+06	3.70903e+06	3233925	3.54518e+06	2.58861e+06	2.74445e+06	3.1821e+06	3.04286e+06	-	-
Wbtn002952	C13H19NO7	[M-H]-	1-(β-D-Glucopyranosyl)-3-ethyl-4-methyl-1H-pyrrole-2,5-dione	Others	Ketone compounds	-	2.57848e+06	5.18732e+06	3.83958e+06	5.77807e+06	2.93276e+06	4.85162e+06	3.58886e+06	5.07953e+06	3.9591e+06	3.7952e+06	3.31189e+06	3.82396e+06	-	-
Zmjp003597	C19H32O8	[M+H]+	Ampelopsisionoside	Others	Ketone compounds	-	498633	529933	610014	738033	404029	524506	493318	485309	485367	395951	474138	459063	-	-
Hmln003754	C26H34O11	[M-H]-	Icariside E5	Others	Ketone compounds	126176-79-2	626761	428561	925628	640659	448443	587809	517478	402758	552218	665644	587433	726894	-	-
Wbtp005056	C18H16O8	[M+H]+	Methyl 4,5-dihydroxy-6-(2-hydroxyethyl)-8-methoxy-9-oxoxanthene-1-carboxylate	Others	Ketone compounds	-	1.89989e+07	2.99787e+07	3.71156e+07	2.38479e+07	2.29289e+07	2.5327e+07	2.36361e+07	2.83529e+07	2.21217e+07	2.66342e+07	3.15429e+07	2.55471e+07	-	-
Lmyp003951	C11H14O5	[M+H]+	3-Hydroxy-1-(4-hydroxy-3,5-dimethoxyphenyl)propan-1-one	Others	Ketone compounds	-	26934180	1.02621e+07	26768410	26059405	1.85577e+07	1.68942e+07	1.70211e+07	30508175	1.82148e+07	1.6801e+07	1.31271e+07	1.48451e+07	-	-
MWS0434	C19H28O2	[M-H]-	Trans-dehydrorosinone	Others	Ketone compounds	53-43-0	67197.1	38119.3	39310.2	55045	27588	24457.5	27703.2	36802.1	118756	62370.8	51234.9	47954.3	-	-
Wtmp012979	C38H50O5	[M+H]+	4-hydroxy-3-(3-hydroxybenzoyl)-8-methyl-1,5,7-tris(3-methylbut-2-en-1-yl)-8-(4-methylpent-3-en-1-yl)bicyclo[3.3.1]non-3-ene-2,9-dione	Others	Ketone compounds	-	313341	495296	409514	1.83289e+06	589314	307469	250163	1.25649e+06	261825	1.56879e+06	1.33372e+06	1.18929e+06	-	-
Lmjp006197	C10H10O	[M+H]+	Dihydronaphthalenone	Others	Ketone compounds	530-93-8	100399	175911	163443	143087	129391	126822	174315	170414	134632	142289	60354.7	117528	-	-
pmp000252	C12H16O4	[M-H2O+H]+	Senkyunolide I	Others	Lactones	94596-28-8	5.87054e+06	1.0362e+07	1.36062e+07	6.17678e+06	7.40593e+06	6.21844e+06	6.11711e+06	5.61471e+06	5.00226e+06	7.3464e+06	6.71652e+06	7.17238e+06	-	-
Lmxn008846	C11H18O3	[M-H]-	Hydroxydihydrobovolide	Others	Lactones	6067-11-4	98207.8	138306	124913	98017.1	75776.9	86177.1	98079.5	101513	98252.4	123758	115067	112788	-	-
pmp001232	C12H14O2	[M+H]+	Neoligustilide	Others	Lactones	-	886978	351344	644937	569147	812727	627651	661166	220956	473582	637426	561103	560234	-	-
MWSmce041	C12H14O2	[M+H]+	Butylphthalide	Others	Lactones	6066-49-5	394384	174092	257442	292380	394193	346600	220277	141972	218704	314250	284882	265724	C17854	-
MWSmce412	C12H16O2	[M+H]+	Senkyunolide A	Others	Lactones	63038-10-8	896405	306410	738392	492481	828152	551872	563538	259458	298718	555695	472848	465589	C17853	-
Zmcp102201	C12H12O3	[M+H]+	Senkyunolide B	Others	Lactones	93236-67-0	2.1317e+07	3.35959e+06	1.56317e+07	1.45213e+07	1.93236e+07	1.31066e+07	1.30587e+07	1.49193e+07	1.34037e+07	1.51754e+07	1.30462e+07	1.26172e+07	C09921	-
Cmyp007180	C11H16O2	[M+H]+	Dihydroactinidiolide	Others	Lactones	17092-92-1	4.56583e+06	1.64526e+06	1.89278e+06	1.73315e+06	3.14971e+06	1.80667e+06	1.63048e+06	1.15876e+06	1.88686e+06	2.24141e+06	1.88761e+06	1.89457e+06	-	-
Zmcp102203	C16H22O4	[M+H]+	Senkyunolide M	Others	Lactones	146986-60-9	5.32248e+06	5.01458e+06	5.31276e+06	4.80271e+06	5.89696e+06	6.19136e+06	5.64692e+06	5.47084e+06	5.88885e+06	5.7388e+06	5.84311e+06	6.93572e+06	-	-
Lmmn006306	C18H30O3	[M-H]-	Machilusolide D	Others	Lactones	-	330773	2.22843e+06	146413	239116	205487	213190	284404	340676	455657	507130	327795	421672	-	-
pmp001229	C12H16O3	[M+H]+	Senkyunolide K	Others	Lactones	114569-33-4	282769	40221.1	150762	93472.8	171227	118442	85526.7	58068.1	91048.5	142300	144265	89298.8	-	-
Wcdp007560	C26H52NO7P	[M+H]+	1-Vaccenoyl-Glycero-3-Phosphocholine	Others	Others	-	1.03258e+07	3.1987e+06	3.95635e+06	1.50301e+07	1.08983e+07	1.90138e+07	1.40209e+07	9.22558e+06	1.55502e+07	1.12419e+07	1.12185e+07	1.12303e+07	-	-
Wasn006585	C21H36O10	[M-H]-	Geranyl 3-O-xylopyranosyl-glucopyranoside	Others	Others	-	1.44377e+07	2.55671e+07	2.06616e+07	1.83143e+07	1.63255e+07	2.14586e+07	1.82835e+07	1.89808e+07	1.71875e+07	1.7554e+07	1.77337e+07	1.77192e+07	-	-
Zajn009456	C15H20O2	[M-H]-	Mansonone A	Others	Others	7715-94-8	172377	60764.5	616802	4.36767e+06	4.53578e+06	1.23087e+07	4.82793e+06	1.49065e+06	1.1456e+06	3.33933e+06	3.28646e+06	3.29585e+06	-	-
Lcsn000560	C6H4O5	[M-H]-	2,5-Furandicarboxylic acid	Others	Others	3238-40-2	1.52863e+06	1.44269e+06	1.4692e+06	1.5745e+06	1.39315e+06	1.56082e+06	1.46584e+06	1.43657e+06	1.41044e+06	1.52013e+06	1.48911e+06	1.50415e+06	C20450	-
Zmsn002533	C16H24O10	[M-H]-	6a-dihydrocornic acid	Others	Others	-	1.45168e+07	4.76094e+07	4.52661e+07	2.735e+07	1.81446e+07	2.37154e+07	2.88179e+07	1.0894e+07	1.65934e+07	2.39439e+07	2.41913e+07	2.36925e+07	-	-
Lhgp102206	C15H14O6	[M+H]+	Katsumadin	Others	Others	-	4.36804e+06	1.66233e+06	2.65354e+06	2.68621e+06	5.08903e+06	4.11787e+06	3.70403e+06	3.94783e+06	2.55132e+06	3.19977e+06	3.26879e+06	3.27869e+06	-	-
Qmjp012113	C34H52O6	[M+H]+	Hypericumoxide N(ISO)	Others	Others	-	131190	7.81225e+06	32673.8	31773.7	109071	125796	129566	376067	294339	1.12135e+06	1.10179e+06	1.08542e+06	-	-
Wbmp005829	C16H12O6	[M+H]+	5,16-Dimethyl-3,9,12,18-tetraoxaheptacyclo[9.7.0.01,15.02,6.02,10.07,14.08,13]octadeca-5,15-diene-4,17-dione	Others	Others	-	1.20586e+07	8.87183e+06	9.94745e+06	2.04139e+07	1.38355e+07	2.27914e+07	1.39213e+07	1.36396e+07	1.81765e+07	1.33164e+07	1.35558e+07	1.31134e+07	-	-
Hasp010605	C21H36O4	[M+H]+	(S)-2,3-dihydroxypropyl (9Z,12Z,15Z)-octadeca-9,12,15-trienoate	Others	Others	129828-41-7	2.60346e+06	1.29213e+06	1.46424e+06	2.81594e+06	2.27124e+06	2.85268e+06	2.7118e+06	1.8104e+06	2.60981e+06	2.1026e+06	2.16825e+06	2.11238e+06	-	-
Wcfn006909	C17H14O7	[M-H]-	(2Z)-4,6-Dihydroxy-2-[(4-Hydroxy-3,5-Dimethoxyphenyl)Methylidene]-1-Benzofuran-3-One	Others	Others	-	7.86213e+06	9.47576e+06	1.12304e+07	9.22572e+06	8.99598e+06	1.09173e+07	1.01836e+07	9.34142e+06	1.02357e+07	9.33433e+06	9.40096e+06	9.09205e+06	-	-
Lhqp102842	C16H24O10	[M+H]+	8-Hydroxy-10-hydrosweroside	Others	Others	-	2.73923e+06	3.06219e+06	1.97341e+06	3.89225e+06	3.50912e+06	2.71273e+06	4.19476e+06	6.83453e+06	5.36119e+06	3.46371e+06	3.52825e+06	3.59092e+06	-	-
Waln006120	C19H36O10	[M-H]-	Octyl 6-O-Alpha-L-Arabinopyranosyl-Beta-D-Glucopyranoside	Others	Others	168288-07-1	7.11954e+06	1.50709e+07	1.60786e+07	5.05882e+06	4.6675e+06	6.39193e+06	4.88901e+06	4.18381e+06	5.40166e+06	7.68366e+06	7.47021e+06	7.31949e+06	-	-
Lssp210351	C26H38O8	[M+H]+	Pieroside C	Others	Others	-	185441	235354	425640	358790	203485	209156	171920	307000	212518	221742	217238	209712	-	-
Wchn003545	C20H22O12	[M-H]-	3-Hydroxy-5-Methoxyphenyl-6-O-Galloyl-Beta-D-Galactopyranoside*	Others	Others	-	2.61973e+06	3.7746e+06	3.98404e+06	2.18362e+06	2.97409e+06	2.89586e+06	3.20444e+06	4.18553e+06	4.43557e+06	3.05142e+06	3.2281e+06	3.14228e+06	-	-
pmb0764	C6H9NOS	[M+H]+	4-Methyl-5-thiazoleethanol	Others	Others	137-00-8	18785.6	46670.7	48921	34140.5	30041.4	44811.8	41318.1	28996.3	12595.9	45775.4	43249.1	44192.7	C04294	ko00730,ko01100,ko01240
Zamp003418	C15H20O8	[M+H]+	Paeonoside	Others	Others	20309-70-0	1.66085e+06	1.20554e+06	838784	1.43414e+06	1.02549e+06	699814	864899	1.0039e+06	783861	991497	1.04165e+06	1.05287e+06	C10717	-
Yaap009385	C24H30O6	[M+H]+	Myrtucommulone B	Others	Others	54247-23-3	2.67046e+06	2.35772e+06	2.31816e+06	2.14841e+06	1.58969e+06	2.4191e+06	2.09401e+06	2.42525e+06	2.5623e+06	1.16269e+06	1.17229e+06	1.23588e+06	-	-
Wcsn010349	C22H32O4	[M-H]-	Moniliferanone D	Others	Others	-	1.20754e+06	922337	1.24123e+06	1.36331e+06	1.06326e+06	1.49528e+06	1.43139e+06	1.16658e+06	2.15876e+06	1.40912e+06	1.33722e+06	1.3239e+06	-	-
Hamp007385	C17H16O5	[M+H]+	5-hydroxy-7,8-dimethoxyflavanone	Others	Others	-	1.2355e+07	4.73033e+06	4.16938e+06	8.03054e+06	6.24044e+06	4.2713e+06	4.5396e+06	4.51939e+06	4.26957e+07	9.51165e+06	1.01625e+07	9.98924e+06	-	-
Zmsp002859	C9H14O3	[M+Na]+	Comolactone A	Others	Others	-	3.12491e+06	3.48424e+06	4.23283e+06	3.09914e+06	5.33862e+06	2.94204e+06	3.83277e+06	3.21683e+06	2.7628e+06	3.54651e+06	3.43339e+06	3.3104e+06	-	-
Zmcp102206	C24H30O4	[M-H]-	(Z)-3,8-Dihydro 6,6·;7,3'a-diligustilide	Others	Others	-	6.4259e+06	6.76549e+06	6.57357e+06	6.8169e+06	6.28545e+06	6.42139e+06	6.73721e+06	6.44604e+06	6.91172e+06	6.50034e+06	6.88604e+06	6.47597e+06	-	-
Wcdp006741	C26H50NO7P	[M+H]+	1-(9Z,12Z-Octadecadienoyl)-Sn-Glycero-3-Phosphocholine	Others	Others	22252-07-9	1.21752e+07	7.52882e+06	7.61122e+06	8.55499e+06	1.08082e+07	1.16116e+07	1.01981e+07	8.21332e+06	1.42953e+07	9.40957e+06	9.95644e+06	1.00852e+07	-	-
Lmmp102003	C15H22O	[M+H]+	1(10)E,4E-Germacrone	Others	Others	-	2.04755e+06	1.02475e+06	1.41177e+06	639655	1.36908e+06	2.68341e+06	1.89914e+06	859609	1.62913e+06	862176	914583	853948	-	-
Lssp210438	C16H12O6	[M+H]+	3'-O-methylorobol(ISO1)	Others	Others	-	12339540	5.23071e+07	6.10295e+07	4.92574e+07	4.49486e+07	4.63144e+07	4.46068e+07	3.53353e+07	4.17491e+07	4.77759e+07	4.71294e+07	5.07057e+07	-	-
MWSHC2052	C19H20O6	[M+H]+	2'-Hydroxy-4,4',5',6'-Tetramethoxychalcone	Others	Others	3877-67-6	1.47989e+06	1.23319e+06	1.58012e+06	1.0985e+06	1.32148e+06	1.89378e+06	1.00062e+06	1.59939e+06	1.17044e+06	1.24687e+06	1.35076e+06	1.3078e+06	-	-
Zbsp003145	C15H14O6	[M+H]+	Leucopelargonidin; 3,4,5,7,4'-Pentahydroxyflavan	Others	Others	520-17-2	3.12086e+07	1.13036e+07	1.4991e+07	1.68705e+07	3.04274e+07	2.45637e+07	2.26519e+07	2.59448e+07	1.78261e+07	2.11036e+07	1.99804e+07	2.16322e+07	-	-
Wcsn011125	C22H34O4	[M-H]-	Ethyl (4E,6E,8E,10E,13Z)-15,16-dihydroxy-5,9-dimethyloctadeca-4,6,8,10,13-pentaenoate	Others	Others	-	131129	62947.8	95905.2	127450	100169	116654	136627	125619	155988	113333	106148	105375	-	-
Wchn004418	C10H10O3	[M-H]-	2-Hydroxy-1-tetralone	Others	Others	-	637000	506781	302983	530001	615187	503750	789937	565587	729051	604259	556377	588351	-	-
Lchp000218	C11H12O4	[M+H]+	(R)-3-ethyl-7-hydroxy-6-methoxyphthalide	Others	Others	-	1.51954e+06	1.24421e+06	1.07535e+06	2.45255e+06	1.24369e+06	2.06722e+06	1.41941e+06	1.66161e+06	1.21911e+06	1.7248e+06	1.70993e+06	1.5896e+06	-	-
Wcdp006247	C26H48NO7P	[M+H]+	1-18:3-LysoPC	Others	Others	-	9.5521e+06	1.05321e+07	1.0496e+07	1.47972e+07	1.04095e+07	1.98811e+07	1.66934e+07	1.09362e+07	1.60826e+07	1.28081e+07	1.29117e+07	1.38829e+07	-	-
Zbsp001807	C13H14O9	[M+H]+	Salicylacyl Glucuronide	Others	Others	-	1.41415e+06	1.19596e+07	8.82523e+06	978007	906049	977797	1.3506e+06	1.68291e+06	1.27471e+06	3.41211e+06	3.36786e+06	3.66335e+06	-	-
Lhhp120826	C12H14O2	[M+H]+	4-hydroxy-3(3-methylbut-3-en-2-yl)benzaldehyde	Others	Others	-	359494	145395	185449	279190	278326	308785	240613	196119	164595	262033	238723	253694	-	-
Wcgp011192	C16H24O2	[M+H]+	5-Hydroxy-8,8-dimethyl-1,3,4,4a,4b,5,6,7,8a,9-decahydrophenanthren-2-one	Others	Others	-	1.18007e+06	759820	939633	753423	852835	833062	834533	921789	766179	844046	774224	784175	-	-
Zjbn102547	C28H30O9	[M-H]-	2,7-Dihydroxy-1-(p-hydroxybenzyl)-4-methoxy-9,10-dihydrophenanthrene-4'-O-glucose	Others	Others	-	174485	312672	275596	153264	243196	188362	157827	150725	136031	169423	185735	173558	-	-
Wasn005621	C17H30O8	[M-H]-	Glucosyl 9-hydroxy-3-methyldec-2-enoic acid	Others	Others	-	622267	1.81785e+06	1.0039e+06	779504	665313	796225	531800	508347	725397	850741	793800	774978	-	-
Zjbn102532	C22H18O4	[M-H]-	1-p-Hydroxybenzyl-4-methoxyphenanthrene-2,7-diol	Others	Others	-	95820	105722	58817.3	119081	34063.1	144899	34157.6	129352	126491	103249	112684	103655	-	-
Lhmp101303	C11H16O8	[M+H]+	Ranunculinin glucoside	Others	Others	-	1.14367e+06	1.04888e+06	1.02873e+06	1.02301e+06	1.21537e+06	1.11405e+06	867073	996490	903314	1.02748e+06	965689	930864	-	-
Zahn007990	C11H18O3	[M-H]-	5-hydroxy-3,4-dimeth-yl-5-pentylfuran-2(5H)-one	Others	Others	-	89890.4	132125	107940	94747.8	83077	96256.6	95972.1	89453.5	110818	98554.1	109313	105140	-	-
zjgp122326	C12H15NO7	[M+H]+	Pyridine-4-formyl-O-β-D-glucopyranoside	Others	Others	-	1.13418e+06	686455	828466	866177	1.36129e+06	1.46193e+06	920115	1.17533e+06	1.01389e+06	911042	820114	870953	-	-
Wcdp001930	C10H10O4	[M+H]+	3ξ-(1ξ-hydroxyethyl)-7-hydroxy-1-isobenzofuranone	Others	Others	-	193733	358856	393272	235069	248436	279034	313280	196704	241595	230657	215806	207849	-	-
Lhmp122205	C18H20O4	[M+H]+	5-O-Methyllatifolin	Others	Others	-	229555	146847	205537	224492	203003	196959	195851	184104	192940	168088	187095	181468	-	-
Wcgn012724	C16H26O4	[M-H]-	6-Hydroxyphomodiol	Others	Others	-	1.17731e+07	1.01201e+07	1.19429e+07	1.04671e+07	1.07879e+07	9.5018e+06	1.1816e+07	9.89245e+06	1.13645e+07	1.00815e+07	1.04258e+07	1.12344e+07	-	-
Wdjp003521	C21H22O8	[M+H]+	2-(7-hydroxy-4-methoxyphenanthren-2-yl)oxy-6-(hydroxymethyl)oxane-3,4,5-triol	Others	Others	-	12850280	6259670	6922675	8271925	12606505	11704035	12755635	10787295	11209835	9858375	10828595	10952570	-	-
Wasn000410	C6H15O8P	[M-H]-	sn-glycero-3-phospho-(1'-sn-glycerol)	Others	Others	-	670431	2.00151e+06	2.66345e+06	775344	881848	674593	951491	928373	775789	1.03359e+06	940164	932544	-	-
Lskp211380	C18H12O9	[M+H]+	3,4-Methylenedioxy-3',4'-dimethoxy-5'-hydroxyellagic Acid	Others	Others	-	3.79492e+06	3.12704e+06	3.85665e+06	4.80519e+06	4.23462e+06	6.0117e+06	5.11051e+06	5.58985e+06	5.07232e+06	4.07438e+06	4.58454e+06	4.39989e+06	-	-
Wasn003942	C16H28O9	[M-H]-	Glucosyl 6,9-dihydroxydec-4-enoic acid	Others	Others	-	1.14558e+06	1.55591e+06	1.74195e+06	497540	1.44404e+06	1.57526e+06	1.25389e+06	1.33601e+06	1.09126e+06	1.23913e+06	1.38631e+06	1.36508e+06	-	-
Wafn005121	C19H34O10	[M-H]-	1-Octen-3-Ol-3-O-Beta-D-Xylopyranosyl(1→6)-Beta-D-Glucopyranoside	Others	Others	150995-11-2	1.06694e+07	8.40527e+06	7.35925e+06	8.40959e+06	1.28555e+07	1.15048e+07	1.0082e+07	1.21047e+07	9.41105e+06	9.87959e+06	1.01797e+07	9.02616e+06	C17614	-
Wcgp010223	C18H28O2	[M+H]+	3-(Cyclohexen-1-yl)-2-hydroxy-4a,5-dimethyl-2,3,4,5,6,7,8,8a-octahydronaphthalen-1-one	Others	Others	-	552175	358527	526536	529445	513944	638159	622500	671933	2.17526e+06	729201	642975	691923	-	-
Wcdp006912	C16H35NO2	[M+H]+	Lauryldiethanolamine	Others	Others	1541-67-9	1.27428e+07	1.64468e+07	1.79637e+07	1.31035e+07	2.62255e+07	2.43638e+07	1.58471e+07	1.18193e+07	1.30918e+07	2.77165e+07	2.42497e+07	2.60403e+07	-	-
Lmln001856	C21H20O13	[M-H]-	5,7-Dihydroxy-4-oxo-2-(3,4,5-trihydroxyphenyl)-4H-chromen-3-yl-alloside	Others	Others	-	5.53278e+06	5.17457e+06	3.89477e+06	9.6368e+06	7.00572e+06	8.82319e+06	8.6632e+06	9.621e+06	8.81133e+06	6.82902e+06	7.80498e+06	7.26025e+06	-	-
WaYn002042	C12H20O7	[M+CH3COOH-H]-	[(1R,2R)-cyclohex-4-ene-1,2-diol]Beta-D-Galactopyranoside	Others	Others	-	73219.2	138054	66395.7	150228	66399.3	154604	73675.8	82255.9	104771	100966	89421.9	100577	-	-
Haxp007330	C10H10O3	[M+H]+	p-Methoxycinnamic acida	Others	Others	-	797676	194717	564431	268656	554463	474727	239385	216099	209218	393169	381157	342738	-	-
Lssp210350	C26H38O8	[M+H]+	Pierisfomoside C	Others	Others	-	1.46149e+07	6.02396e+07	5.89096e+07	2.02285e+07	1.61441e+07	2.75896e+07	1.64688e+07	1.2834e+07	1.11442e+07	2.94222e+07	3.33291e+07	2.95245e+07	-	-
Lhmp122227	C15H14O5	[M+H]+	2-(2,4-Dihydroxyphenyl)-1-(4-hydroxy-2-methoxyphenyl)ethanone	Others	Others	-	2.40648e+07	1.48796e+07	1.6782e+07	1.76733e+07	2.4121e+07	2.05559e+07	1.74551e+07	2.24811e+07	1.67544e+07	1.63795e+07	1.89475e+07	1.78809e+07	-	-
Wasn005922	C20H34O10	[M-H]-	Demethylgeranyl 6-O-xylopyranosyl-glucopyranoside	Others	Others	-	1.13641e+07	1.06669e+07	8.83139e+06	1.2952e+07	1.15094e+07	1.32594e+07	1.2612e+07	1.26843e+07	1.27642e+07	1.24641e+07	1.11761e+07	1.06739e+07	-	-
Lhhp102901	C20H24O6	[M+H]+	3-(α,4-Dihydroxy-3-methoxybenzyl)-4-(hydroxy-3-methoxybenzyl)	Others	Others	-	177918	288828	187970	153016	243074	294961	326027	223578	275414	231850	196732	218298	-	-
Lssp210352	C26H40O10	[M+H]+	Pierisfomoside D	Others	Others	-	405915	542963	726230	453188	367454	362356	506388	379467	441848	442521	431269	376137	-	-
Wcgp003250	C10H10O2	[M+H]+	2-Methyl-3-hydroxyindan-1-one	Others	Others	-	7.65687e+06	7.73169e+06	9.19235e+06	8.9508e+06	1.36818e+07	7.14732e+06	7.77047e+06	8.67755e+06	7.77641e+06	1.02551e+07	8.5959e+06	9.16712e+06	-	-
Lhhp120823	C11H12O3	[M+H]+	Eugenyl formate	Others	Others	-	2.3907e+06	1.95525e+06	2.45314e+06	2.49511e+06	3.17061e+06	1.63997e+06	1.81093e+06	1.83638e+06	1.65816e+06	2.18273e+06	1.93227e+06	1.81358e+06	-	-
Wafn003834	C21H36O11	[M-H]-	Hydroxygeranyl 6-O-xylopyranosyl-glucopyranoside	Others	Others	-	5.38031e+06	7.65406e+06	7.14858e+06	7.14319e+06	5.92785e+06	7.46886e+06	6.10518e+06	5.49424e+06	6.6882e+06	5.37737e+06	5.76019e+06	6.51578e+06	-	-
Yalp003420	C10H10O2	[M+H]+	2-(furan-2-ylmethyl)-5-methylfuran	Others	Others	13678-51-8	20882270	11633590	16369125	18309200	15641990	18407430	18035625	20134985	20448780	14717270	18041280	16445575	-	-
Wcgn008207	C12H16O4	[M-H]-	Aspidinol	Others	Others	519-40-4	42602.7	53884.1	50841.4	24465	24067.6	50020.6	22221.6	44979.6	44951.7	47948	42213.7	39028.2	-	-
Zahp011689	C12H12O3	[M+H]+	2,2-dimethylchromene-6-carboxylic acid	Others	Others	34818-56-9	2.25017e+07	3.58193e+06	1.55348e+07	1.40683e+07	1.8248e+07	1.31766e+07	1.34042e+07	1.54264e+07	1.26247e+07	1.5155e+07	1.32698e+07	1.22836e+07	-	-
Lhmp122020	C21H26O13	[M+H]+	3-O-caffeoyl quininyl arabinoside	Others	Others	-	566699	458036	532718	407346	569557	663448	478017	434891	305171	424008	492220	401313	-	-
Lssp210281	C19H18O11	[M+H]+	1,5-dihydroxy ketone-6 murine O-β-D-glucoside(ISO1)	Others	Others	-	2.00217e+07	3.08387e+07	3.17222e+07	1.06678e+07	1.88847e+07	1.98474e+07	1.41987e+07	1.51183e+07	1.95004e+07	1.87987e+07	1.51903e+07	1.81685e+07	-	-
Wcfp002357	C15H20N6O8	[M+H]+	N6-Threonylcarbamoyladenosine	Others	Others	24719-82-2	918726	819897	812570	969173	1.00806e+06	1.16065e+06	923177	1.32914e+06	819444	722315	904220	815844	-	-
Zasn010461	C17H34O2	[M-H]-	Pentadecanoic acid,14-methyl-,methyl ester	Others	Others	5129-60-2	245971	242808	213948	267988	163716	281470	225924	227286	237397	206486	213471	253951	-	-
Qahn003953	C12H22O6	[M-H]-	Erigeside B	Others	Others	95632-87-4	152836	266057	116070	218462	217305	179016	151850	124323	123737	201123	174596	159914	-	-
Zahp008538	C13H14O4	[M+H]+	4-allyl-1,2-phenylene diacetate	Others	Others	-	322145	93353	210332	184972	286794	229496	226564	100574	115979	194452	193720	156884	-	-
Zbzp007397	C11H16O2	[M+H]+	5,6,7,7a-tetrahydro-4,4,7a-trimethyl-2(4H)-benzofuranone	Others	Others	15356-74-8	3.45709e+06	1.21445e+06	1.59066e+06	1.33231e+06	2.33155e+06	1.38897e+06	1.28081e+06	885556	1.54755e+06	1.81611e+06	1.5113e+06	1.45892e+06	-	-
Zahp005541	C11H10O4	[M+H]+	(2z)-3-(7-methoxy-2h-1,3-benzodioxol-5-yl)prop-2-enal	Others	Others	-	514420	247378	278543	417176	554346	482163	643524	822911	656372	516852	504095	410269	-	-
Lmhp001671	C16H18O9	[M+H]+	Noreugenin-7-O-glucoside	Others	Others	-	5.86817e+06	6.44475e+06	3.97801e+06	5.09664e+06	6.92421e+06	3.83652e+06	5.88859e+06	8.00698e+06	1.23112e+07	5.91667e+06	5.37046e+06	6.85104e+06	-	-
Lchp000221	C11H10O4	[M+H]+	(Z)-3-Ethylidene-7-hydroxy-6-methoxyphthalide	Others	Others	-	9.38602e+06	3.88968e+06	4.89173e+06	7.91288e+06	3.81455e+06	3.63915e+06	5.67835e+06	6.98898e+06	6.09181e+06	5.75732e+06	4.49316e+06	4.9723e+06	-	-
Zasn010433	C20H36O2	[M-H]-	9,12-Octadecadienoic acid,ethyl ester	Others	Others	6114-21-2	455980	637495	346796	687707	317788	240010	469462	476303	365829	661425	545969	524506	-	-
Lhmp122018	C22H28O14	[M+H]+	3-O-caffeoyl quininyl glucoside	Others	Others	-	97946.7	149691	77254.3	54065.8	18340	176725	76989.2	94437.4	111691	122995	97427.9	127702	-	-
Lmmp004541	C19H32O7	[M+H]+	Byzantionoside B	Others	Others	189109-45-3	1084115	1.91098e+06	939760	1021990	629732	3400120	3986715	835903	562470	1383360	1082435	1.10357e+06	-	-
Wayn003721	C9H8O6S	[M-H]-	p-Coumaric acid 4-O-sulfate	Others	Others	-	67935.3	54388.1	54460.4	35743.4	27745.3	56890.4	42528.6	36450.2	43560.2	35879.6	45414	35320.6	-	-
zjgp122321	C16H18O9	[M+H]+	4-O-acetyl-3-O-caffeoyl-2-C-methyl-D-erythronate	Others	Others	-	842490	319467	597290	976262	563163	534610	681033	961638	967291	684654	907337	899146	-	-
Yaap002857	C14H18O9	[M+H]+	Myrciaphenone A	Others	Others	26089-54-3	262657	194401	158050	238560	390837	234092	192214	188286	179721	224512	186261	255032	-	-
Lsmp121707	C24H40O11	[M+H]+	Cuneataside E	Others	Others	-	1481000	828336	1053890	876718	554783	815373	861836	626485	706109	563225	707407	518489	-	-
Zmsn002206	C16H24O10	[M-H]-	Cornusoside A	Others	Others	-	1.21968e+07	1.09832e+07	1.84444e+07	1.21564e+07	1.12448e+07	9.99121e+06	1.29669e+07	1.18652e+07	1.09937e+07	1.39764e+07	9.97399e+06	1.28174e+07	-	-
Wasn006047	C21H36O9	[M-H]-	Glucosyl 10,11-dihydroxy-2,6-farneSadienoate	Others	Others	-	244340	394930	384271	250038	232125	355950	243547	227706	204553	288099	331761	229428	-	-
Lscp211204	C19H32O8	[M+H]+	Sedumoside I	Others	Others	-	4.17792e+06	1.38707e+07	9.10564e+06	1.13779e+07	8.34738e+06	1.04149e+07	6.50717e+06	7.88834e+06	8.11362e+06	5.92291e+06	6.458e+06	8.37269e+06	-	-
Lscp211210	C19H30O8	[M+H]+	Neosedumoside II	Others	Others	-	945324	1982035	1.49314e+06	1.0014e+06	945209	1.18982e+06	1.02288e+06	1.03032e+06	1.125e+06	953871	853480	649278	-	-
Lskp211431	C19H32O8	[M+H]+	Methyl {(1R,2S,3S)-3-(B-D-glucopyransyloxy)-2-[(2'Z)-pent-2-en-1-ylI]cyclopentyl}acete	Others	Others	-	2.03822e+06	7.80925e+06	6.29225e+06	7.1795e+06	1.56787e+06	9.29949e+06	4.43773e+06	3.9052e+06	4.4263e+06	5.25271e+06	7.72356e+06	6.93523e+06	-	-
Lsjp211202	C13H20O3	[M+H]+	Blumenol A	Others	Others	23526-45-6	347095	659865	529320	551665	479145	569475	436700	286960	472196	512590	342080	437340	-	-
Lhmp110109	C22H24O7	[M+H]+	Pyramidatin F	Others	Others	-	971640	344403	701730	857580	825725	750310	614239	1015280	745987	621546	822370	491702	-	-
Lssp210303	C26H40O9	[M+H]+	Pieroside B	Others	Others	-	34367.1	71447.9	77535.6	203485	65020	64048.9	76147.2	74173	75509.6	84214.4	58658.2	49217.5	-	-
Lssp210189	C20H24O7	[M+H]+	(7'R)-7'-Hydroxylariciresinol(ISO)	Others	Others	-	156484	63376.4	101897	109119	125125	60169.2	86649.7	80223.4	106713	38345	66558.4	69798.1	-	-
Lssp210356	C26H40O10	[M+H]+	Pierisfomoside E	Others	Others	-	66685	65020	35732.8	55015	39103.5	238029	71690	26675	56069.6	49794.2	38345	72661	-	-
Lmsp102912	C20H30O13	[M+H]+	2,4,6-Trimethoxyphenyl 1-O-β-D-apiofuranosyl-(1→6)-β-D-glucopyranoside	Others	Others	-	23340	14655.3	31628.1	24563.4	20005	8047.62	4664.99	13393.4	15485.7	18340	15005	28340	-	-
Zahp009811	C13H14O3	[M+H]+	Eupatoriochromene	Others	Others	19013-03-7	857492	122202	554964	259765	412527	396676	241029	148153	156871	323340	530438	274793	C09006	-
pmp001145	C23H26O11	[M+H]+	Crassifoside D	Others	Others	-	116720	144285	77899.7	94928.7	74105.3	85807.2	99041.4	104927	79249.4	55665.7	88681.9	131735	-	-
Lssp210345	C26H42O10	[M+H]+	Craiobioside B	Others	Others	-	3.19914e+06	1.77615e+06	1.41675e+06	2.89932e+06	1.55228e+06	1.69008e+06	1.86317e+06	2.25249e+06	1.98682e+06	1.54155e+06	3.11289e+06	1.60416e+06	-	-
pmb0302	C2H8NO3P	[M+H]+	2-Aminoethylphosphonate	Others	Others	2041-14-7	9	9	9	35194.6	48795.2	55953.9	18340	32863.9	42048.3	15005	34168.5	38971	C03557	ko00440,ko01100,ko02010
MWSHC2042	C12H16O4	[M+H]+	(2E)-3-(1-Hydroxy-2,6,6-trimethyl-4-oxo-2-cyclohexen-1-yl)-2-propenoic acid	Others	Others	26690-86-8	226564	321017	180595	799740	231645	666560	758617	335400	475757	653392	410595	246525	-	-
Zmyn000230	C5H8O5	[M-H]-	2-Dehydro-3-deoxy-L-arabinonate	Others	Saccharides	-	2.90888e+06	2.92313e+06	3.09235e+06	3.25581e+06	2.77364e+06	3.06753e+06	3.10675e+06	2.9434e+06	2.63515e+06	3.06719e+06	3.05594e+06	3.0524e+06	C00684	ko00053,ko01100
Lmbn000198	C4H6O5	[M-H]-	3-Dehydro-L-Threonic Acid	Others	Saccharides	-	3.06098e+06	2.69013e+06	3.71676e+06	3.13636e+06	3.11357e+06	2.81609e+06	3.26646e+06	3.0797e+06	2.22581e+06	2.94418e+06	2.96269e+06	2.94519e+06	C03064	ko00053,ko01100
pme2125	C18H32O16	[M-H]-	Raffinose*	Others	Saccharides	512-69-6	8.34186e+06	3.83626e+07	3.00941e+07	1.06417e+07	6.32785e+06	8.03858e+06	9.93985e+06	9.41344e+06	7.92976e+06	1.29988e+07	1.30616e+07	1.31469e+07	C00492	ko00052,ko01100,ko02010
pmf0138	C6H12O6	[M-H]-	D-Mannose*	Others	Saccharides	3458-28-4	3.0231e+06	2.92952e+06	2.53737e+06	2.60672e+06	3.27298e+06	2.65493e+06	2.18971e+06	2.54879e+06	2.67419e+06	2.65727e+06	2.63616e+06	2.66574e+06	C00159	ko00051,ko00052,ko00520,ko01100,ko01250,ko02010
Zamn00402	C6H12O6	[M-H]-	sorbose*	Others	Saccharides	-	3.03535e+06	3.12128e+06	2.48394e+06	2.34542e+06	3.13609e+06	2.40777e+06	2.48881e+06	2.2373e+06	2.20973e+06	2.41029e+06	2.38114e+06	2.42338e+06	-	-
Zmyn000108	C6H10O8	[M-H]-	D-Saccharic acid	Others	Saccharides	87-73-0	489735	356354	327760	688495	596498	1.54186e+06	535213	459480	501442	524245	516807	526376	C00818	ko00053,ko01100
mws1164	C6H12O6	[M-H]-	D-Fructose*	Others	Saccharides	57-48-7	2.94623e+06	2.74783e+06	2.31663e+06	2.46204e+06	2.95672e+06	2.51435e+06	2.23513e+06	2.34108e+06	2.41392e+06	2.49372e+06	2.44441e+06	2.49616e+06	C05003	-
Wdzn000513	C7H14O6	[M-H]-	(2r,3s,4s,5r)-2,5-bis(hydroxymethyl)-2-methoxyoxolane-3,4-diol*	Others	Saccharides	-	3.76973e+06	3.15029e+06	3.06461e+06	3.58576e+06	4.15895e+06	3.53008e+06	3.87905e+06	3.85496e+06	3.68979e+06	3.627e+06	3.53496e+06	3.60782e+06	-	-
ML10171848	C5H8O5	[M-H]-	D-Arabinono-1,4-lactone*	Others	Saccharides	2782-09-4	1.99787e+06	1.22182e+06	1.2157e+06	2.0368e+06	2.14753e+06	2.00703e+06	1.90352e+06	1.80428e+06	1.55145e+06	1.84207e+06	1.79096e+06	1.78708e+06	C00652	ko00053,ko01100
mws0889	C4H8O5	[M-H]-	D-Threonic Acid	Others	Saccharides	3909-12-4	2.22945e+06	1.38718e+06	1.46227e+06	2.02682e+06	2.11542e+06	1.66189e+06	1.9879e+06	1.92094e+06	1.62035e+06	1.89104e+06	1.86269e+06	1.92701e+06	C21649	-
Hmln000297	C6H12O6	[M-H]-	Inositol*	Others	Saccharides	87-89-8	3.26987e+06	3.20347e+06	2.75729e+06	2.68969e+06	3.63068e+06	2.92646e+06	2.55624e+06	2.75853e+06	2.86649e+06	2.82352e+06	2.86391e+06	2.94703e+06	C00137	ko00052,ko00053,ko00562,ko01100,ko01110,ko01250,ko02010,ko04070
mws4163	C24H42O21	[M-H]-	Nystose	Others	Saccharides	13133-07-8	172131	2.30308e+06	1.01841e+06	299487	140684	287327	129715	172134	161758	355631	349752	365839	-	-
mws1333	C12H22O11	[M-H]-	Melibiose	Others	Saccharides	585-99-9	8.10374e+06	1.56455e+07	3.11652e+07	9.92238e+06	9.122e+06	9.78229e+06	1.09269e+07	1.29136e+07	1.18439e+07	1.39158e+07	1.32459e+07	1.35819e+07	C05402	ko00052,ko01100,ko02010
pmf0139	C6H12O6	[M-H]-	D-Galactose*	Others	Saccharides	59-23-4	3.06755e+06	3.0796e+06	2.7292e+06	2.43539e+06	3.37298e+06	2.65919e+06	2.43534e+06	2.53074e+06	2.65066e+06	2.69985e+06	2.61853e+06	2.76347e+06	C00124	ko00052,ko01100
Hmcn000192	C7H14O7	[M-H]-	Sedoheptulose	Others	Saccharides	3019-74-7	975000	1720335	2690180	1897565	1376625	267341	886085	1442270	344060	1526475	1593875	1605675	C02076	ko00710,ko01100
Zmgn000173	C5H10O5	[M-H]-	D-Ribose	Others	Saccharides	50-69-1	155603	81209.4	61117.6	161967	189249	184669	167155	155600	185213	154547	153500	146629	C00121	ko00030,ko01100,ko02010
Zmyn000268	C3H6O3	[M-H]-	2,3-Dihydroxypropanal	Others	Saccharides	56-82-6	105849	47050	61758.6	52922.4	77038.7	77631.5	73830.3	40585	57979.8	75867.7	72244.6	76456.8	C02154	-
mws1155	C6H14O6	[M-H]-	D-Mannitol	Others	Saccharides	69-65-8	6517.92	23730.5	13965.6	17995.2	18208.3	9777.58	6527.26	6519.32	6051.66	8845.06	8844.34	8381.58	C00392	ko00051,ko01100,ko02010
mws2608	C8H15NO6	[M+H]+	N-Acetyl-D-galactosamine	Others	Saccharides	1811-31-0	257866	459439	459994	160933	158919	165099	166788	160044	170722	247986	254480	239186	C01132	ko00052,ko00520,ko01100,ko01250
Lmqn000432	C9H19O11P	[M-H]-	1-(sn-Glycero-3-phospho)-1D-myo-inositol	Others	Saccharides	-	9.26468e+06	6.14439e+06	6.16235e+06	6.56966e+06	9.27298e+06	6.28534e+06	1.13345e+07	7.95425e+06	6.91176e+06	8.34989e+06	8.89772e+06	8.46369e+06	-	-
Wafn003485	C14H26O9	[M-H]-	Dihydroxyoctanoic acid glucoside	Others	Saccharides	-	124014	133728	85678.6	177356	162731	182065	179223	133268	174261	146862	136672	138824	-	-
MWS2442	C6H13O9P	[M-H]-	D-Fructose 6-Phosphate*	Others	Saccharides	643-13-0	6.04833e+06	4.75868e+06	1.55543e+07	7.6066e+06	1.27679e+07	7.611e+06	7.11157e+06	7.27444e+06	6.85207e+06	7.52122e+06	7.53205e+06	8.0728e+06	C00085	ko00052,ko00500,ko00710,ko01100,ko01110,ko01200
mws4170	C6H12O6	[M-H]-	D-Glucose*	Others	Saccharides	50-99-7	2.82369e+06	2.81446e+06	2.59058e+06	2.2113e+06	2.99009e+06	2.43688e+06	2.4738e+06	2.28772e+06	2.1255e+06	2.35099e+06	2.52603e+06	2.53966e+06	C00031	ko00010,ko00030,ko00052,ko00500,ko00520,ko00524,ko00901,ko01100,ko01110,ko02010
mws0344	C5H10O6	[M-H]-	D-Xylonic acid	Others	Saccharides	526-91-0	8.46447e+06	8.32389e+06	7.82545e+06	1.06507e+07	8.59842e+06	8.74954e+06	8.87456e+06	9.3214e+06	8.10734e+06	9.01779e+06	8.57603e+06	9.37721e+06	C00502	ko00040,ko01100
Wafn003987	C21H38O11	[M+CH3COOH-H]-	Decanoyl arabinosylglucoside	Others	Saccharides	-	174791	907657	941989	515836	709027	749767	477623	145408	105515	551286	527601	579909	-	-
MWSmce682	C5H10O5	[M-H]-	DL-Xylose*	Others	Saccharides	25990-60-7	137384	346126	274565	131592	124187	236956	290300	97742.3	99672.6	225185	216627	204835	-	-
pme2529	C6H12O5	[M-H]-	1,5-Anhydro-D-glucitol	Others	Saccharides	154-58-5	82609	85967.9	87066.9	58086.3	58263.7	76623	63072.9	92140.4	121725	84118.5	89832.5	81899	C07326	-
mws1189	C6H10O7	[M-H]-	D-Galacturonic acid*	Others	Saccharides	685-73-4	1.92732e+06	1.41717e+06	932987	1.82729e+06	2.05969e+06	1.50558e+06	1.7177e+06	1.22424e+06	1.79104e+06	1.77488e+06	1.67812e+06	1.84819e+06	C00333	ko00040,ko00053,ko00520,ko01100,ko01240,ko01250,ko02010
mws2104	C7H14O6	[M-H]-	D-Pinitol*	Others	Saccharides	10284-63-6	4.46067e+06	3.79834e+06	3.69691e+06	4.42699e+06	4.74976e+06	4.12153e+06	4.20155e+06	4.78869e+06	4.56424e+06	4.49902e+06	4.32273e+06	4.7579e+06	C03844	-
Wmmp000181	C19H26O12	[M-H]-	1´-O-Benzoylsucrose	Others	Saccharides	-	120119	111201	154882	78288.3	284692	135404	157686	94725	84784.6	124817	115396	126597	-	-
pmb3079	C8H16NO9P	[M-H]-	N-Acetyl-D-glucosamine-1-phosphate	Others	Saccharides	6866-69-9	31328.5	34409.7	26647.8	29492.7	34372.8	48065.5	38900.6	51707.3	74329.9	42934.8	41846.2	38807.7	C04256	-
pme0534	C6H12O7	[M-H]-	Gluconic acid	Others	Saccharides	526-95-4	3.28868e+06	2.5659e+06	2.20407e+06	2.95859e+06	3.18321e+06	2.38362e+06	2.11075e+06	3.16908e+06	3.14639e+06	3.03009e+06	2.83722e+06	3.14655e+06	C00257	ko00030,ko01100,ko01110,ko01200
mws5038	C12H22O11	[M-H]-	Isomaltulose*	Others	Saccharides	13718-94-0	881452	2.08409e+06	3.9094e+06	881197	917434	1.22472e+06	1.57593e+06	1.03131e+06	720423	1.44326e+06	1.44462e+06	1.57851e+06	C01742	-
MWS0442	C18H32O16	[M+Na]+	Maltotriose	Others	Saccharides	1109-28-0	2.45936e+07	4.56672e+07	3.12808e+07	3.87289e+07	2.29857e+07	2.02152e+07	3.01359e+07	3.97201e+07	2.9563e+07	3.15046e+07	3.20801e+07	3.47549e+07	C01835	ko02010
Zmzn000078	C3H7O6P	[M-H]-	Dihydroxyacetone phosphate	Others	Saccharides	57-04-5	344620	175142	150449	336390	435960	327059	496555	420801	337182	361924	360109	326690	C00111	ko00010,ko00040,ko00051,ko00052,ko00561,ko00562,ko00564,ko00630,ko00640,ko00710,ko00760,ko01100,ko01110,ko01200,ko01230
MWS1983	C12H24O11	[M-H]-	Maltitol	Others	Saccharides	585-88-6	614616	1.45662e+06	2.27127e+06	794651	658506	856688	936526	1.25922e+06	927955	1.13172e+06	1.08041e+06	1.21965e+06	-	-
MWSmce165	C6H14O5	[M-H]-	L-Fucitol	Others	Saccharides	13074-06-1	1.65003e+06	1.73083e+06	1.51225e+06	2.23753e+06	1.7727e+06	1.91132e+06	1.47031e+06	1.95314e+06	1.68868e+06	1.86574e+06	1.74869e+06	1.97877e+06	-	-
pme0519	C12H22O11	[M-H]-	D-Sucrose*	Others	Saccharides	57-50-1	1.51288e+07	3.65594e+07	6.05884e+07	1.75287e+07	1.66261e+07	1.84944e+07	2.13131e+07	2.28154e+07	2.03812e+07	2.18557e+07	2.37412e+07	2.4715e+07	C00089	ko00052,ko00500,ko01100,ko01110,ko02010
Zmyn000083	C6H14O12P2	[M-H]-	D-Glucose 1,6-bisphosphate	Others	Saccharides	10139-18-1	103282	33287	73695.4	114233	171110	99169.6	161405	159775	123742	109652	117821	124203	C01231	ko00500,ko01100
Zmpn000095	C6H15O9P	[M-H]-	Sorbitol-6-phosphate	Others	Saccharides	20479-58-7	317766	142654	257727	318020	287098	312083	338554	295404	318717	280972	319435	303997	C01096	ko00051,ko01100
mws1499	C5H10O5	[M-H]-	D-Arabinose*	Others	Saccharides	10323-20-3	305330	325594	293401	129991	169340	262538	250225	107259	119816	141914	139527	157154	C00216	ko00040,ko00053,ko00520,ko01100,ko01250
Hmqp001042	C10H20O6	[M+H]+	Butyl beta-D-glucoside	Others	Saccharides	5391-18-4	420978	406843	547726	462760	453761	404235	496402	449827	491736	407741	435146	466276	-	-
Zmgn000447	C3H7O7P	[M-H]-	3-Phospho-D-glyceric acid	Others	Saccharides	820-11-1	1.22409e+06	750529	1.26694e+06	1.53055e+06	1.75178e+06	1.31048e+06	1.36772e+06	1.46979e+06	1.3284e+06	1.52948e+06	1.36244e+06	1.36301e+06	C00197	ko00010,ko00030,ko00260,ko00270,ko00561,ko00630,ko00710,ko01100,ko01110,ko01200,ko01230,ko01240
Zmzn000079	C4H9O7P	[M-H]-	D-Erythrose-4-phosphate	Others	Saccharides	585-18-2	940083	654511	1.1385e+06	1.05392e+06	865344	1.01763e+06	970924	917986	1.11352e+06	951317	850021	973262	C00279	ko00030,ko00400,ko00710,ko00750,ko01100,ko01110,ko01200,ko01230,ko01240
pme3163	C7H15O10P	[M-H]-	D-Sedoheptuiose 7-phosphate	Others	Saccharides	2646-35-7	1.70287e+06	2.67545e+06	2.73415e+06	1.57372e+06	2.0022e+06	2.10722e+06	2.07914e+06	1.788e+06	2.13064e+06	1.96325e+06	2.24373e+06	2.21868e+06	-	-
pmb3081	C6H11PO11	[M-H]-	Glucaric acid-1-Phosphate	Others	Saccharides	-	2.21328e+06	2.60706e+06	1.57554e+06	1.64377e+06	819759	1.4972e+06	1.42421e+06	1.55982e+06	1.78312e+06	1.87867e+06	2.09127e+06	1.81612e+06	-	-
mws1090	C6H13O9P	[M-H]-	D-Glucose-1-phosphate*	Others	Saccharides	59-56-3	3.9106e+06	1.56075e+06	3.58872e+06	3.35783e+06	4.6383e+06	3.50377e+06	4.41945e+06	3.57548e+06	3.36212e+06	3.3258e+06	3.70126e+06	3.85983e+06	C00103	ko00010,ko00040,ko00052,ko00500,ko00520,ko00523,ko00561,ko01100,ko01110,ko01240,ko01250
pmf0575	C25H43NO18	[M-H]-	Acarbose	Others	Saccharides	56180-94-0	23834.4	7389.44	5922.26	8942.95	11429.8	13916.8	21675	13783.5	8272.18	6954.48	6083.23	6958.03	C06802	ko01100,ko01110
Lmsn000954	C8H16O6	[M-H]-	Dambonitol	Others	Saccharides	523-94-4	2.95915e+06	472187	570555	1.03462e+06	2.30048e+06	2.08367e+06	1.00917e+06	1.29419e+06	704380	1.23263e+06	1.37815e+06	1.43616e+06	-	-
mws4175	C6H8O6	[M-H]-	D-Glucurono-6,3-lactone	Others	Saccharides	32449-92-6	1.08205e+06	1.84762e+06	1.407e+06	1.48871e+06	1.49563e+06	1.26092e+06	1.12843e+06	1.24661e+06	1.0739e+06	1.04893e+06	1.20074e+06	1.20732e+06	C02670	ko00053,ko01100
mws2523	C12H23O14P	[M-H]-	Trehalose 6-phosphate	Others	Saccharides	4484-88-2	214306	263647	384665	153318	252402	184977	264880	219677	183488	229703	217127	254878	C00689	ko00500,ko01100,ko01110
MA10039641	C12H22O11	[M-H]-	D-Lactose*	Others	Saccharides	63-42-3	2.47437e+07	5.7531e+07	8.58046e+07	3.34936e+07	2.20834e+07	2.7859e+07	3.40221e+07	3.78134e+07	3.25228e+07	4.05552e+07	3.59735e+07	4.25853e+07	C01970	-
mws1593	C24H42O21	[M-H]-	D-Maltotetraose	Others	Saccharides	34612-38-9	38011.5	335531	193955	49076.4	38018.1	53419	31285	37529.5	30795.1	56286	62541.8	66881.6	C02052	-
Zmyn000110	C6H14NO8P	[M-H]-	D-Glucosamine 1-phosphate	Others	Saccharides	2152-75-2	103439	75955.2	245642	107132	91469	77329.9	107289	101168	120147	99278.1	94658.4	111690	C06156	ko00520,ko01100,ko01250
MWSmce203	C12H22O11	[M-H]-	D-Cellobiose	Others	Saccharides	528-50-7	445079	841678	1.31295e+06	482465	437113	401008	544185	681131	477352	474476	560319	551588	-	-
Zbln000478	C14H24O9	[M-H]-	2-(4-hydroxy-1-((3,4,5-trihydroxy-6-(hydroxymethyl)tetrahydro-2H-pyran-2-yl)oxy)cyclohexyl)acetic acid	Others	Saccharides	-	33602.2	54555.3	189650	51360.4	76597.5	32750	39112.3	60259.8	44270.5	57780.1	48598.6	50210.1	-	-
pmb0786	C6H13NO5	[M+H]+	D-Glucosamine	Others	Saccharides	3416-24-8	430788	361640	489577	474648	383642	316386	360662	395021	376340	374629	330183	398648	C00329	ko00520,ko01100,ko01250
pme3311	C6H14O12P2	[M-H]-	D-Fructose-1,6-biphosphate	Others	Saccharides	488-69-7	206008	226947	190450	166750	294441	165045	193400	196414	160286	206940	199162	171694	C00354	ko00400,ko00710,ko01100,ko01110,ko01200
mws1080	C12H22O11	[M-H]-	Galactinol	Others	Saccharides	3687-64-7	635528	1.62333e+06	2.59779e+06	742790	749334	826820	1.12202e+06	996151	706438	1.01523e+06	1.1344e+06	930180	C01235	ko00052,ko01100
MW0112142	C18H32O15	[M+Na]+	2'-Fucosyl-D-lactose	Others	Saccharides	41263-94-9	5.09907e+06	2.61274e+07	2.66051e+07	3.05005e+06	3.19957e+06	3.34509e+06	4.4761e+06	4.84301e+06	3.10045e+06	9.1474e+06	8.22025e+06	10147203	-	-
mws1589	C18H32O16	[M-H]-	D-Panose*	Others	Saccharides	33401-87-5	2.47865e+06	1.38403e+07	9.44196e+06	3.05063e+06	1.99112e+06	2.51295e+06	2.36075e+06	2.97692e+06	2.02381e+06	3.11535e+06	2.97681e+06	3.62386e+06	C00713	-
Wcgn003981	C14H18O9	[M-H]-	Woodorien	Others	Saccharides	155112-92-8	1.95618e+06	2.80062e+06	2.49921e+06	1.36336e+06	1.78571e+06	1.74406e+06	1.81201e+06	1.89702e+06	1.83565e+06	1.97726e+06	1.59519e+06	1.85541e+06	-	-
Wcdn000434	C12H22O11	[M-H]-	5-{[3,4-dihydroxy-2,5-bis(hydroxymethyl)oxolan-2-yl]oxy}-2-(hydroxymethyl)oxane-2,3,4-triol	Others	Saccharides	-	1.31781e+07	2.89761e+07	3.72638e+07	1.47181e+07	1.30583e+07	1.40213e+07	1.80646e+07	1.86172e+07	1.58051e+07	2.09833e+07	1.68565e+07	1.92725e+07	-	-
pma6455	C5H11O8P	[M-H]-	Ribulose-5-phosphate	Others	Saccharides	4151-19-3	169249	141351	199319	264739	47007.5	252123	257975	232091	324900	234130	292580	246753	C00199	ko00030,ko00040,ko00710,ko00740,ko01100,ko01110,ko01200,ko01230,ko01240,ko01250
Lmsn000381	C12H22O11	[M-H]-	D-Maltose*	Others	Saccharides	69-79-4	1.03505e+06	2.11478e+06	2.70726e+06	1.2439e+06	996013	963141	1.67861e+06	1.11289e+06	1.0076e+06	1.39705e+06	1.80991e+06	1.60919e+06	C01971	-
pme0500	C18H32O16	[M-H]-	D-Melezitose	Others	Saccharides	597-12-6	627125	3.12915e+06	2.04257e+06	793574	434789	518164	555875	766495	450624	702692	867996	907892	C08243	-
pmb2653	C24H42O20	[M-H]-	DMelezitose O-rhamnoside	Others	Saccharides	-	774305	1.16125e+07	8.95764e+06	630515	596181	502575	607360	848376	356068	1.53303e+06	1.99967e+06	1.76026e+06	-	-
mws4174	C8H15NO6	[M+H]+	N-Acetyl-D-mannosamine	Others	Saccharides	7772-94-3	45807.1	38333.4	33253.7	13146.9	45580	43930.9	26639.3	29559.4	57430.1	42571.4	55873.5	43853.6	C00645	ko00520,ko01100,ko01250
mws0264	C12H22O11	[M-H]-	D-Trehalose*	Others	Saccharides	99-20-7	1.14642e+07	2.65642e+07	4.22091e+07	1.54621e+07	1.28543e+07	1.46477e+07	1.84465e+07	1.83303e+07	1.67076e+07	1.40258e+07	1.76869e+07	1.95173e+07	C01083	ko00500,ko01100,ko01110,ko02010
Lcsn000341	C18H32O15	[M-H]-	3'-Fucosyllactose	Others	Saccharides	41312-47-4	2.77952e+06	1.41926e+07	3.70074e+07	1.19607e+06	2.02613e+06	1.63065e+06	1.33026e+06	3.82066e+06	1.45426e+06	5.23762e+06	6.5888e+06	7.30292e+06	-	-
pme2755	C8H15NO6	[M+H]+	N-Acetyl-D-glucosamine	Others	Saccharides	7512-17-6	61196.3	45769.5	48865	69688.5	85425.2	88045.3	81162	86738.3	84148.1	67176	71819.4	49736.8	C00140	ko00520,ko01100,ko01250,ko02010
MWS0559	C6H10O5	[M-H]-	1,6-anhydro-β-D-glucose	Others	Saccharides	498-07-7	66537.2	81877.6	81118.4	65068.7	31652.9	80851.9	51507.1	52784.6	30261.2	62062.5	48867.1	71529.3	-	-
Zmpn000199	C6H10O8	[M-H]-	D-Galactaric acid	Others	Saccharides	526-99-8	609489	1.22943e+06	1.62586e+06	1.402e+06	1.03157e+06	661808	862790	1.15318e+06	820011	1.08002e+06	761470	1.11393e+06	C00879	ko00053,ko01100
Lmmn000214	C18H32O15	[M-H]-	Solatriose	Others	Saccharides	528-40-5	258649	1.26429e+06	3.26281e+06	209859	286471	160508	253632	210392	85136	463334	582154	385077	-	-
Lmqn000213	C24H42O21	[M-H]-	Stachyose	Others	Saccharides	470-55-3	180876	2.3087e+06	1.09217e+06	326146	118669	297710	142470	197798	189087	431272	309533	298435	C01613	ko00052,ko01100
Wafn003633	C18H32O9	[M-H]-	1-O-Acetyl-Glucopyranose 6-Hydroxydecanoate	Others	Saccharides	-	131735	148819	61036.4	43254	121725	78418.7	41173.5	91543	62813.4	52736	83642.6	72846.2	-	-
MWSmce598	C30H52O26	[M+H]+	Maltopentaose	Others	Saccharides	34620-76-3	6670	56685	14654.4	38345	14664.4	6347.9	5376.55	15005	1468.93	14166.5	9770.08	8818.41	-	-
pme3705	C6H10O7	[M-H]-	D-Glucoronic acid*	Others	Saccharides	6556-12-3	1.82857e+06	1.03255e+06	1.2979e+06	1.32254e+06	1.61615e+06	1.50097e+06	1.65853e+06	1.0859e+06	1.30447e+06	1.9538e+06	1.15132e+06	1.85975e+06	C00191	ko00040,ko00053,ko00520,ko00562,ko01100,ko01240,ko01250
Lmqn000351	C12H22O10	[M-H]-	Rutinose	Others	Saccharides	90-74-4	21675	114810	154264	51997.3	52223.4	78547	42730.2	74988.1	77601.9	86516.6	82972.6	180120	C08247	-
Zapn010848	C18H16O5	[M-H]-	gnetifolin U	Others	Stilbene	-	1.34651e+06	1.94702e+06	2.57484e+06	2.03517e+06	1.61079e+06	2.13983e+06	1.5838e+06	2.21507e+06	1.63386e+06	1.84608e+06	1.8475e+06	1.81979e+06	-	-
Lmtp004915	C24H26O11	[M+H]+	3,5-Dihydroxy-3',4'-diacetoxylstilbene-3-O-glucoside	Others	Stilbene	-	1.44552e+06	2.3923e+06	2.43978e+06	1.43769e+06	442191	2.00624e+06	1.5445e+06	1.51177e+06	1.40507e+06	1.76179e+06	1.73281e+06	1.76017e+06	-	-
Zmhn001970	C20H22O8	[M-H]-	Piceid (3,4',5-Trihydroxystilbene-3-O-glucoside)	Others	Stilbene	27208-80-6	2.03324e+06	1.07401e+06	1.20493e+06	831079	1.06139e+06	726480	1.06661e+06	1.15781e+06	941710	1.11035e+06	1.09703e+06	1.07776e+06	C10275	-
pmn001399	C20H22O9	[M-H]-	2,4,6,4'-Tetrahydroxy-stilbene-2-O-glucoside	Others	Stilbene	-	1.88767e+06	2.1874e+06	1.47266e+06	2.24403e+06	2.16064e+06	2.27042e+06	1.75084e+06	1.6075e+06	1.84288e+06	1.5379e+06	1.7874e+06	1.91509e+06	-	-
mws2103	C14H12O4	[M-H]-	Piceatannol	Others	Stilbene	10083-24-6	37256	91543	51194.4	72526.7	44114.1	41680	82215	65774.2	64693.6	94448.6	73530.5	91478.1	C05901	ko00945
mws1337	C9H17NO5	[M+H]+	D-Pantothenic Acid	Others	Vitamin	79-83-4	2.33129e+07	3.47791e+07	2.73144e+07	2.56e+07	1.93126e+07	2.19058e+07	2.16635e+07	2.41096e+07	2.4021e+07	2.37652e+07	2.44452e+07	2.37927e+07	C00864	ko00410,ko00770,ko01100,ko01110,ko01240
Wasn000528	C12H18O11	[M-H]-	2-O-α-D-Glucopyranosyl-L-ascorbic acid	Others	Vitamin	129499-78-1	226984	653065	366478	253544	329753	271174	1050530	299814	185990	280184	270847	273681	C18339	-
Hmfn000531	C6H8O6	[M-H]-	L-Ascorbic acid (Vitamin C)	Others	Vitamin	50-81-7	2.41463e+07	4.08035e+07	3.3271e+07	3.46105e+07	3.4657e+07	2.79809e+07	2.55042e+07	2.64049e+07	2.63514e+07	2.61598e+07	2.72156e+07	2.69589e+07	C00072	ko00053,ko00480,ko01100,ko01110,ko01240
pme2165	C5H4N2O4	[M-H]-	Orotic acid (Vitamin B13)	Others	Vitamin	65-86-1	2.93238e+06	2.50146e+06	2.36666e+06	3.02804e+06	2.81658e+06	2.84813e+06	2.89578e+06	2.61053e+06	1.30572e+06	2.87456e+06	2.74676e+06	2.75898e+06	C00295	ko00240,ko01100,ko01240
MA10039492	C6H6O6	[M-H]-	Dehydroascorbic acid	Others	Vitamin	490-83-5	1.59536e+06	909836	865122	1.01297e+06	1.55918e+06	997007	1.17426e+06	1.2225e+06	1.68773e+06	1.28134e+06	1.31419e+06	1.2402e+06	C05422	ko00053,ko00480,ko01100
pma3101	C11H14NO6+	[M]+	Nicotinate D-ribonucleoside	Others	Vitamin	17720-18-2	1.96212e+06	1.79486e+06	1.78108e+06	2.34529e+06	2.03434e+06	2.74884e+06	2.04518e+06	1.64918e+06	2.18802e+06	1.84414e+06	1.95364e+06	1.85209e+06	C05841	ko00760,ko01100
mws0133	C6H6N2O	[M+H]+	Nicotinamide	Others	Vitamin	98-92-0	1.20204e+06	938558	933989	1.53251e+06	1.49074e+06	1.53944e+06	1.3344e+06	1.18691e+06	1.30267e+06	1.31607e+06	1.28143e+06	1.22846e+06	C00153	ko00760,ko01100,ko01240
pme2596	C8H9NO4	[M+H]+	4-Pyridoxic acid	Others	Vitamin	82-82-6	730625	887291	666654	1.04614e+06	539303	767228	424768	504784	608728	640645	606803	669981	C00847	ko00750,ko01100
pma1751	C12H15NO7	[M+H]+	N-(beta-D-Glucosyl)nicotinate	Others	Vitamin	-	1.31592e+06	814018	743693	2.98031e+06	2.09867e+06	4.05688e+06	920847	1.4291e+06	1.48579e+06	1.54723e+06	1.72122e+06	1.59368e+06	-	-
pme1383	C8H11NO3	[M+H]+	Pyridoxine	Others	Vitamin	65-23-6	2.18124e+06	5.82665e+06	1.80762e+06	2.75474e+06	2.6038e+06	3.89618e+06	2.1228e+06	1.73111e+06	2.0619e+06	2.67653e+06	2.73342e+06	2.42833e+06	C00314	ko00750,ko01100,ko01240
Zmjp000624	C8H9NO3	[M+H]+	Pyridoxal	Others	Vitamin	66-72-8	631482	539841	321936	784407	691098	917145	693788	538362	636526	713929	664226	629348	C00250	ko00750,ko01100,ko01240
pmf0248	C27H46O2	[M+H]+	Delta-Tocopherol	Others	Vitamin	119-13-1	358565	341653	404495	413551	451961	422105	344865	266169	303535	390556	410332	361262	C14151	ko00130,ko01100,ko01110,ko01240
Wasn001007	C12H18O11	[M-H]-	Isoascorbic acid 2-O-glucoside	Others	Vitamin	-	3.48821e+06	5.71997e+06	4.2013e+06	3.53337e+06	5.02604e+06	3.96355e+06	2.85145e+06	4.24787e+06	3.21658e+06	3.95755e+06	4.08732e+06	3.60485e+06	-	-
pmb0803	C24H29NO11	[M+H]+	Pyridoxine-5'-O-(6''-feruloyl)glucoside	Others	Vitamin	-	43673.1	15302.9	28502	38345	22614	21560.9	10443.5	17380.6	6670	25005	28340	27821	-	-
mws0232	C17H20N4O6	[M+H]+	Riboflavin (Vitamin B2)	Others	Vitamin	83-88-5	852550	563491	427310	1272330	637674	1612415	591246	1321105	832780	690735	608342	678323	C00255	ko00740,ko01100,ko01110,ko01240,ko02010
pme1014	C31H40O2	[M+H]+	Menatetrenone (Vitamin K2)	Others	Vitamin	11032-49-8	748906	419709	449310	747105	532429	590716	470076	167264	296034	780470	903304	855160	-	-
pmb0801	C14H19NO9	[M+H]+	4-Pyridoxic acid-O-glucoside	Others	Vitamin	-	673028	1.19925e+06	749627	1.1093e+06	646180	1.10885e+06	567600	681380	520053	722029	821462	729085	-	-
MWSmce674	C31H46O2	[M+H]+	Phylloquinone (Vitamin K1)	Others	Vitamin	84-80-0	91263.4	90602.3	109966	110017	129521	91128.4	122209	85673.8	128917	112269	124094	106702	-	-
pme2289	C20H30O	[M+H]+	Retinol (Vitamin A1)	Others	Vitamin	68-26-8	496554	438062	483541	589971	489886	558782	529960	483320	492627	533161	581157	487452	C00473	ko01100,ko01240
MWSmce039	C6H5NO2	[M+H]+	Isonicotinic acid	Others	Vitamin	55-22-1	790661	575017	471953	1.30945e+06	436499	1.56757e+06	808601	675941	622669	903997	749122	803145	C07446	-
pme2266	C10H16N2O3S	[M+H]+	Biotin	Others	Vitamin	58-85-5	554827	468018	413886	812769	481258	588272	591882	737997	759676	567161	682400	589667	C00120	ko00780,ko01100,ko01240,ko02010
mws0655	C8H10NO6P	[M-H]-	Pyridoxal-5'-phosphate	Others	Vitamin	54-47-7	94929.8	191491	160098	146169	80517.2	115202	76462.9	73012.8	115568	99400.8	118786	97456.8	C00018	ko00730,ko00750,ko01100,ko01240
pme0490	C6H5NO2	[M+H]+	Nicotinic acid (Vitamin B3)	Others	Vitamin	59-67-6	462391	380792	384224	694483	544499	624608	670188	717583	912050	678693	634004	541122	C00253	ko00760,ko00960,ko01100,ko01110,ko01240
pmb0789	C14H21NO8	[M+H]+	Pyridoxine-5'-O-glucoside	Others	Vitamin	-	1.56099e+07	4.07682e+07	2.51267e+07	2.58892e+07	1.57463e+07	2.67585e+07	1.59128e+07	1.6284e+07	1.44028e+07	1.88221e+07	2.32319e+07	2.33679e+07	C03996	-
Wasn002512	C19H22O15	[M-H]-	6-Galloylglucosyl Aascorbic acid	Others	Vitamin	-	680611	1.33562e+06	796022	786738	490955	761761	596304	714820	778154	700566	935729	821258	-	-
pmb0952	C12H17N4OS+	[M]+	Thiamine (Vitamin B1)	Others	Vitamin	70-16-6	33260.7	10005	49763.6	47578	34477.6	53301.6	34488.9	49230.9	72679.8	47042.4	54145.4	64899.8	C00378	ko00730,ko01100,ko01240,ko02010,ko04122
MWSmce278	C21H26O3	[M+H]+	Acitretin	Others	Vitamin	55079-83-9	42867.2	22878.6	44925.9	65821.2	53561.6	61883.7	61787.1	45200.7	31758.4	52924	51735.7	37898.1	-	-
MWSmce690	C6H8O6	[M-H]-	Erythorbic Acid; Isoascorbic Acid	Others	Vitamin	89-65-6	2.75837e+06	4.36519e+06	4.36085e+06	4.31598e+06	4.27692e+06	3.61723e+06	2.65965e+06	3.54507e+06	3.97959e+06	2.95126e+06	2.91829e+06	4.02754e+06	-	-
pmf0249	C27H40O2	[M+H]+	δ-Tocotrienol	Others	Vitamin	25612-59-3	81806	218539	253351	276998	259231	295106	178653	299557	231999	178779	267584	231306	C14156	ko00130,ko01100,ko01110
pmn001687	C13H12O8	[M-H]-	Cis-Coutaric acid	Phenolic acids	Phenolic acids	67920-37-0	8.31179e+06	4.42772e+06	4.17317e+06	5.49856e+06	8.03903e+06	7.37776e+06	4.4867e+06	7.16047e+06	6.06496e+06	5.99736e+06	6.00341e+06	5.97342e+06	-	-
Ymjm000152	C12H16O7	[M-H]-	p-Hydroxypheny-β-D-allopyranoside	Phenolic acids	Phenolic acids	-	9.50441e+06	3.36126e+06	4.36748e+06	7.24385e+06	9.89708e+06	1.0383e+07	7.23573e+06	9.18113e+06	8.71791e+06	6.65304e+06	6.66806e+06	6.62728e+06	-	-
mws2212	C9H8O4	[M-H]-	Caffeic acid	Phenolic acids	Phenolic acids	331-39-5	516292	490554	468881	435813	485060	460469	425168	430772	607210	437969	435182	438054	C01197	ko00940,ko01100,ko01110
pmp001285	C8H4O3	[M+H]+	Phthalic anhydride	Phenolic acids	Phenolic acids	85-44-9	2.33374e+07	29136135	2.39935e+07	2.07393e+07	3.10233e+07	2.86168e+07	2.70532e+07	2.67268e+07	2.14309e+07	2.73536e+07	2.73656e+07	2.75513e+07	-	-
MWS2066	C10H8O	[M-H]-	1-Naphthol*	Phenolic acids	Phenolic acids	90-15-3	39189.7	26137.8	27880.1	26269.1	33042.2	31773.9	32502	18281.7	26203	32144.3	32150.7	32405.6	C11714	-
Hmtn001120	C14H20O8	[M-H]-	5-(2-Hydroxyethyl)-2-O-glucosylphenol	Phenolic acids	Phenolic acids	-	990928	6.89616e+06	5.17262e+06	1.89239e+06	1.92841e+06	1.60493e+06	1.45482e+06	1.15316e+06	970281	1.72502e+06	1742265	1.74358e+06	-	-
mws4085	C11H12O5	[M-H]-	Sinapic acid	Phenolic acids	Phenolic acids	530-59-6	107856	98077.5	45326.1	86554.6	77643.2	84098.7	67400.1	66317.9	74736.5	88235.6	88836.9	87611.4	C00482	ko00940,ko01100,ko01110
MWS2070	C10H12O3	[M-H]-	Propyl 4-hydroxybenzoate	Phenolic acids	Phenolic acids	94-13-3	110516	93810.3	115810	89520.2	112035	101132	92078.6	84156.8	110156	99722	98596.7	98354.8	-	-
MWSmce294	C12H16O3	[M+H]+	Elemicin	Phenolic acids	Phenolic acids	487-11-6	1.14125e+06	191581	716812	476299	917424	476840	452408	307494	399395	512532	511815	505044	C10451	-
Lcgn000234	C15H16O9	[M-H]-	davidioside C	Phenolic acids	Phenolic acids	-	1.84018e+06	964080	2.00052e+06	5.68065e+06	4.14463e+06	5.62275e+06	5.99472e+06	3.34924e+06	4.33002e+06	3.60432e+06	3.60203e+06	3.54682e+06	-	-
Hmln007772	C17H26O4	[M-H]-	Nordihydrocapsiate	Phenolic acids	Phenolic acids	220012-53-3	7.10435e+06	8.38815e+06	6.79287e+06	6.04977e+06	6.61448e+06	6.46907e+06	7.52569e+06	6.43486e+06	7.39799e+06	4.77849e+06	4.76713e+06	4.68669e+06	-	-
Lmsn004970	C24H24O12	[M-H]-	3,6-Di-O-caffeoyl glucose	Phenolic acids	Phenolic acids	-	842828	1.16102e+06	889186	1067325	695477	368637	927703	925671	938407	980108	997682	978807	-	-
Zmtn001661	C14H20O8	[M-H]-	Vanilloloside	Phenolic acids	Phenolic acids	74950-96-2	1.20532e+06	545022	421401	1.30084e+06	1.19579e+06	1.6811e+06	621786	1.72092e+06	1.37715e+06	997715	997284	977546	-	-
pmn001513	C14H10O9	[M-H]-	Digallic Acid	Phenolic acids	Phenolic acids	536-08-3	1.10484e+07	1.19887e+07	4.71048e+06	9.65843e+06	9.99136e+06	9.30632e+06	1.09052e+07	9.51362e+06	1.36308e+07	9.88538e+06	1.01216e+07	9.99553e+06	C01572	-
Lasp003707	C11H12O5	[M+H]+	Acropyrone	Phenolic acids	Phenolic acids	-	3868520	1.28267e+06	1929655	2788715	1.00683e+06	1541640	1.30221e+06	2902625	1.97624e+06	1.33509e+06	1.33214e+06	1.30566e+06	-	-
Lmnn102707	C14H20O8	[M-H]-	Cimidahurinine	Phenolic acids	Phenolic acids	142542-89-0	2.2498e+06	2.19633e+07	1.6656e+07	3.91012e+06	2.80159e+06	3.49133e+06	2.82926e+06	2.30773e+06	2.09646e+06	5.84544e+06	5.70334e+06	5.72519e+06	-	-
Labp003004	C16H22O9	[M+H]+	Grevilloside E	Phenolic acids	Phenolic acids	-	456839	509448	460793	512292	415855	726935	535817	389525	336226	462720	459877	471780	-	-
Cmzn004594	C21H22O11	[M-H]-	Dunalianoside C	Phenolic acids	Phenolic acids	-	1.20744e+07	1.09254e+07	1.15476e+07	1.00411e+07	1.50605e+07	1.35465e+07	1.24243e+07	1.20321e+07	9.34182e+06	1.15631e+07	1.17371e+07	1.18831e+07	-	-
Lmfn000797	C20H20O14	[M-H]-	2,3-Di-O-Galloyl-β-D-Glucose*	Phenolic acids	Phenolic acids	-	1.42001e+07	2.08803e+08	1.65758e+08	1.60653e+07	1.02786e+07	1.59046e+07	1.73456e+07	2.27075e+07	1.5705e+07	6.58405e+07	6.75051e+07	6.58297e+07	-	-
pmb3068	C16H18O8	[M-H]-	1-O-p-Coumaroylquinic acid*	Phenolic acids	Phenolic acids	-	888797	579847	451249	1.72926e+06	1.2544e+06	1.38153e+06	1.27692e+06	1.69794e+06	1.62881e+06	1.22982e+06	1.258e+06	1.26487e+06	-	-
Wafn003070	C16H20O10	[M-H]-	Hydroxyferulic acid glucoside	Phenolic acids	Phenolic acids	-	2.11715e+06	1.89348e+06	1.88082e+06	2.07793e+06	1.80443e+06	2.35443e+06	1.49533e+06	1.59011e+06	1.69249e+06	1.79287e+06	1.74537e+06	1.74592e+06	-	-
MWSmce573	C9H10O2	[M-H]-	3,4-Dimethylbenzoic acid*	Phenolic acids	Phenolic acids	619-04-5	32515.4	24755.5	27950.9	18287.9	23906.5	26585.1	25309.8	28317.9	26557.4	24546.8	23802.6	24273.1	-	-
pme0290	C9H10O2	[M-H]-	4-Ethylbenzoic acid*	Phenolic acids	Phenolic acids	619-64-7	32515.4	24755.5	27950.9	18287.9	23906.5	26585.1	25309.8	28317.9	26557.4	24546.8	23802.6	24273.1	-	-
Lafp002342	C11H14O6	[M+H]+	2,3-Dihydroxy-1-(4-hydroxy-3,5-dimethoxyphenyl)propan-1-one	Phenolic acids	Phenolic acids	33900-74-2	693156	1.09742e+06	1.29492e+06	593855	1.0005e+06	656068	675432	555664	525452	727204	709989	731658	-	-
Lmsn002887	C14H16O8	[M-H]-	1-O-Caffeoyl-β-D-xylose	Phenolic acids	Phenolic acids	-	27745	31997.4	48748.4	104901	87610	93750.6	79105.8	81949.3	84500.3	63226.8	62654.2	61236.3	-	-
Cmsn001563	C21H22O15	[M-H]-	1,7-Di-O-galloyl-D-sedoheptulose	Phenolic acids	Phenolic acids	-	2.02553e+06	2.57438e+06	1.89866e+06	2.95089e+06	2.22058e+06	2.31774e+06	2.66663e+06	3.08891e+06	3.30441e+06	2.44792e+06	2.47645e+06	2.39696e+06	-	-
pmn001515	C14H14O9	[M-H]-	3-Galloylshikimic acid	Phenolic acids	Phenolic acids	110082-91-2	2.0597e+07	8.39956e+06	9.95642e+06	9.67554e+06	1.56536e+07	1.39092e+07	1.46269e+07	1.83897e+07	1.71014e+07	1.37504e+07	1.33252e+07	1.34209e+07	-	-
Wdtp010604	C20H30O7	[M+H]+	3,4,5-trihydroxy-6-(4-octylphenoxy)oxane-2-carboxylic acid	Phenolic acids	Phenolic acids	-	947868	874788	988643	1.07189e+06	1.02018e+06	979698	924504	882352	960563	900284	870677	880484	-	-
Lmtn000940	C14H18O10	[M-H]-	1-O-(3,4-Dihydroxy-5-methoxy-benzoyl)-glucoside	Phenolic acids	Phenolic acids	-	3.00769e+07	5.76061e+06	5.90605e+06	9.38047e+06	3.00888e+07	2.76136e+07	1.0906e+07	1.33969e+07	4.58032e+06	1.40109e+07	1.35295e+07	1.37836e+07	-	-
Lakn002075	C18H24O12	[M-H]-	4-Hydroxybenzoic acid glucosyl xyloside	Phenolic acids	Phenolic acids	-	101991	144353	192809	89962.2	118001	121564	85916.5	93336.9	101987	120185	118125	115944	-	-
MWSmce248	C9H8O3	[M-H]-	3-Hydroxycinnamic Acid*	Phenolic acids	Phenolic acids	14755-02-3	223813	143070	99628.5	212331	406433	225097	311315	329303	318730	250736	257715	247102	C12621	ko00360,ko01100
Lmbn002648	C9H8O3	[M-H]-	α-Hydroxycinnamic Acid*	Phenolic acids	Phenolic acids	5801-57-0	223813	143070	99628.5	212331	406433	225097	311315	329303	318730	250736	257715	247102	C02763	ko00360,ko01100
mws0025	C6H6O3	[M-H]-	Pyrogallol	Phenolic acids	Phenolic acids	87-66-1	201807	347512	250620	333406	146019	287520	258336	237230	245440	225102	235038	230310	C01108	-
Lmmp003042	C8H8O4	[M+H]+	Protocatechuic Acid Methyl Ester	Phenolic acids	Phenolic acids	2150-43-8	1.9085e+06	3.79689e+06	2.6946e+06	1.9716e+06	1.66311e+06	2.03766e+06	2.04285e+06	1.90422e+06	2.04366e+06	2.25879e+06	2.20868e+06	2.16032e+06	-	-
Lmqn000859	C15H20O9	[M-H]-	4-O-Glucosyl-2-hydroxy-6-methoxyacetophenone	Phenolic acids	Phenolic acids	-	199047	275334	183668	309359	205362	239898	280300	316674	365183	230146	239593	238915	-	-
Zmxn004029	C31H38O11	[M-H]-	7,8-Dihydro-Buddlenol B(erythro)	Phenolic acids	Phenolic acids	-	1.52809e+06	508967	797562	1.24082e+06	2.01227e+06	911151	1.69326e+06	1.09985e+06	1.685e+06	1.2937e+06	1.34456e+06	1.34718e+06	-	-
Wdtp004079	C18H24O8	[M+H]+	3,4,5-Trihydroxy-6-[4-(4-methyl-3-oxopentyl)phenoxy]oxane-2-carboxylic acid	Phenolic acids	Phenolic acids	-	4.42986e+06	3.69998e+06	4.42662e+06	4.3396e+06	1.47299e+06	4.7799e+06	4.74672e+06	4.04873e+06	6.04913e+06	4.47781e+06	4.39602e+06	4.27867e+06	-	-
HJAP051	C12H18O4	[M+H]+	3-(3,4,5-Trimethoxyphenyl)propan-1-ol	Phenolic acids	Phenolic acids	-	2.38139e+06	951791	2.45027e+06	1.79617e+06	2.19333e+06	1.67839e+06	2.90231e+06	3.2985e+06	2.19069e+06	2.14969e+06	2.05238e+06	2.11194e+06	-	-
mws0906	C16H22O8	[M-H]-	Coniferin	Phenolic acids	Phenolic acids	531-29-3	1.31014e+07	8.16421e+06	1.05018e+07	1.02464e+07	1.54459e+07	1.18918e+07	11760263	1.09412e+07	9.69978e+06	1.06516e+07	1.11307e+07	1.10449e+07	C00761	ko00940,ko01110
HJN093	C20H20O12	[M-H]-	2-O-Salicyl-6-O-Galloyl-D-Glucose	Phenolic acids	Phenolic acids	-	887553	1.68721e+06	1.54327e+06	781633	995181	1.13051e+06	850663	766598	966088	1.05948e+06	1.03022e+06	1.07972e+06	-	-
MWSCX015	C9H8O3	[M+H]+	Caffeic aldehyde	Phenolic acids	Phenolic acids	141632-15-7	2.64241e+06	2.3652e+06	2.69718e+06	2.9636e+06	2.22582e+06	2.6755e+06	1.88357e+06	1.87788e+06	1.84417e+06	2.18971e+06	2.22779e+06	2.12508e+06	C10945	ko00940,ko01110
Labn002716	C15H18O11	[M-H]-	galloyl acetyl glucoside	Phenolic acids	Phenolic acids	-	167085	212916	136317	139709	144835	178701	196994	195821	196887	162554	155222	160880	-	-
Lmfp001509	C13H16O9	[M+H]+	1-O-Galloyl-rhamnose	Phenolic acids	Phenolic acids	-	800722	6.57112e+06	5.27315e+06	768807	662340	715932	969001	1.00026e+06	844574	1.7567e+06	1.8217e+06	1.8398e+06	-	-
mws0178	C16H18O9	[M-H]-	Chlorogenic acid (3-O-Caffeoylquinic acid)*	Phenolic acids	Phenolic acids	327-97-9	6.46589e+06	7.56731e+06	6.42881e+06	1.02941e+07	8.70687e+06	8.21502e+06	1.05546e+07	1.25429e+07	1.28565e+07	8.83219e+06	8.71626e+06	9.13985e+06	C00852	ko00940,ko00941,ko00945,ko01110
Lmtn002565	C14H18O9	[M-H]-	1-O-Vanilloyl-D-Glucose	Phenolic acids	Phenolic acids	-	2.23142e+06	3.26929e+06	3.08415e+06	1.71783e+06	2.08029e+06	1.98071e+06	1.97553e+06	2.36655e+06	1.90184e+06	2.16918e+06	2.25762e+06	2.15925e+06	C20470	-
Lakn001671	C14H18O9	[M-H]-	2-β-D-Glucopyranosyloxy-5-hydroxy-phenylacetic acid	Phenolic acids	Phenolic acids	-	1.89067e+06	1.70764e+06	1.51726e+06	2.05066e+06	1.87687e+06	2.46468e+06	1.62831e+06	1.79726e+06	1.85354e+06	1.70351e+06	1.68477e+06	1.76683e+06	-	-
pmn001672	C23H32O15	[M-H]-	Furanofructosyl-α-D-(3-mustard acyl)glucoside*	Phenolic acids	Phenolic acids	-	142502	98032.2	121383	377125	69994.2	143533	153478	213845	205937	189787	181546	181801	-	-
Wasn001246	C14H16O10	[M-H]-	4-O-Galloylquinic Acid	Phenolic acids	Phenolic acids	110170-37-1	1.49489e+06	1.52733e+06	1.30835e+06	2.1475e+06	1.40506e+06	1.67947e+06	2.33575e+06	2.51448e+06	2.69193e+06	2.002e+06	2.06006e+06	1.95805e+06	-	-
Wmhn001495	C20H20O14	[M-H]-	1,4-Di-O-Galloyl-D-glucose	Phenolic acids	Phenolic acids	-	3.1793e+06	2.67452e+07	1.84254e+07	4.08155e+06	2.69702e+06	3.19412e+06	5.2254e+06	5.04356e+06	5.34071e+06	9.17817e+06	8.92357e+06	8.71656e+06	-	-
pme2828	C6H5NO3	[M+H]+	4-Nitrophenol	Phenolic acids	Phenolic acids	100-02-7	2.86037e+07	2.7391e+07	2.51571e+07	1.58381e+07	2.63399e+07	1.57891e+07	2.17877e+07	2.40817e+07	2.12963e+07	2.25733e+07	2.17466e+07	2.14799e+07	C00870	-
Lmsn003644	C23H24O13	[M-H]-	1-O-Galloyl-6-O-Feruloyl-β-D-glucose*	Phenolic acids	Phenolic acids	-	674610	685660	723053	552646	611725	572527	695939	801184	619979	625169	637113	604298	-	-
Yajn002315	C22H28O14	[M-H]-	4-O-(3'-O-alpha-D-Glucopyranosyl)caffeoylquinic acid	Phenolic acids	Phenolic acids	1401352-63-3	787464	878264	496174	1.94936e+06	1.25075e+06	1.4477e+06	1.28876e+06	1.85576e+06	2.40402e+06	1.3361e+06	1.40916e+06	1.36569e+06	-	-
Cmzn005970	C21H22O10	[M-H]-	Dunalianoside A	Phenolic acids	Phenolic acids	-	3.74666e+07	9.64638e+06	1.21587e+07	1.12482e+07	3.2052e+07	2.14883e+07	1.68362e+07	2.39328e+07	1.48206e+07	1.93353e+07	1.84474e+07	1.93284e+07	-	-
Wasn005803	C23H24O12	[M-H]-	Protocatechuic acid 4-O-(6''-O-Feruloyl)Glucoside	Phenolic acids	Phenolic acids	-	2.34483e+06	1.086e+06	910268	2.60041e+06	2.57933e+06	2.91973e+06	2.61007e+06	3.07574e+06	1.79347e+06	2.15431e+06	2.20136e+06	2.27222e+06	-	-
pmp000086	C13H16O6	[M+H]+	1-Feruloyl-sn-glycerol	Phenolic acids	Phenolic acids	-	132048	248636	249476	277151	163885	227889	223756	221092	239876	201568	199796	191484	-	-
Zbln004962	C24H28O11	[M-H]-	2-(3,4-Dihydroxy-phenylethanolyl)-5-O-feruloyl-xylose-glucoside	Phenolic acids	Phenolic acids	-	1.8964e+06	526241	1.00304e+06	1.20896e+06	2.10612e+06	1.51502e+06	1.25107e+06	1.29762e+06	831127	1.34171e+06	1.27126e+06	1.29703e+06	-	-
Lmyn000160	C8H14O8	[M-H]-	Mucic acid Dimethyl Ester	Phenolic acids	Phenolic acids	-	1.06682e+07	1.45463e+07	1.53068e+07	1.16637e+07	1.50736e+07	1.18508e+07	9.8592e+06	8.37246e+06	6.11658e+06	1.28183e+07	1.21421e+07	1.23896e+07	-	-
Lmrn001951	C9H10O4	[M-H]-	(S)-2-Hydroxy-3-(4-Hydroxyphenyl)Propanoic Acid*	Phenolic acids	Phenolic acids	23508-35-2	30362.1	47057.1	78299.6	55739.8	31782.9	41123.3	26197.3	47064.6	42056	41882.2	39756.5	41547.8	-	-
Hmln000659	C13H16O10	[M-H]-	3-O-Galloyl-D-glucose*	Phenolic acids	Phenolic acids	-	4.11922e+06	7.25173e+06	1.1239e+07	3.10153e+06	3.5999e+06	3.04344e+06	4.62664e+06	4.34234e+06	3.14536e+06	5.55215e+06	5.74034e+06	5.87059e+06	-	-
Lmhn003801	C25H24O13	[M-H]-	Feruloylsinapoyltartaric acid	Phenolic acids	Phenolic acids	-	1.32034e+06	252522	449317	872968	1.96427e+06	1.02519e+06	692645	839728	495344	804891	846439	848805	-	-
Lmdn003756	C10H10O4	[M-H]-	Methyl caffeate	Phenolic acids	Phenolic acids	3843-74-1	233019	44164.1	68490.6	201217	237040	207494	223445	360733	308690	201838	192798	191054	C10477	-
pmn001669	C12H14O5	[M-H]-	Methyl sinapate	Phenolic acids	Phenolic acids	20733-94-2	51963.8	24937.3	28096.8	53486.1	52894.7	38048.8	41158.9	45011.2	28923.1	43444.4	43020.8	45474	-	-
mws0011	C17H24O9	[M-H]-	Syringin	Phenolic acids	Phenolic acids	118-34-3	4.25008e+06	5.2186e+06	3.84388e+06	7.5777e+06	4.86884e+06	8.40092e+06	5.66724e+06	5.02495e+06	5.36964e+06	5.20291e+06	4.99357e+06	5.30078e+06	C01533	ko00940
Lmsn003805	C23H24O13	[M-H]-	1-O-Galloyl-4-O-Feruloyl-β-D-glucose*	Phenolic acids	Phenolic acids	-	597328	510114	726387	573478	532976	618548	513519	682282	601688	617820	590441	626319	-	-
pmn001681	C10H14O2	[M-H]-	1-(4-Methoxyphenyl)-1-propanol	Phenolic acids	Phenolic acids	5349-60-0	4.23355e+06	2.97628e+06	3.17275e+06	3.52461e+06	3.25549e+06	3.66678e+06	4.01416e+06	4.44517e+06	3.75177e+06	2.41252e+06	2.54492e+06	2.5474e+06	-	-
Zaln004057	C16H16O8	[M-H]-	4-caffeoylshikimic acid	Phenolic acids	Phenolic acids	-	3.73808e+06	2.13249e+06	3.28961e+06	6.50287e+06	4.67799e+06	6.65951e+06	6.99958e+06	4.99218e+06	6.27839e+06	5.44337e+06	5.14708e+06	5.15199e+06	-	-
Jmwn002494	C15H18O8	[M-H]-	(2E)-3-[4-(β-D-glucopyranoside)-phenylacrylic]-acid	Phenolic acids	Phenolic acids	-	3.88542e+06	4.47805e+06	2.90196e+06	4.08446e+06	3.0659e+06	5.37483e+06	3.63495e+06	4.3042e+06	3.46204e+06	3.36204e+06	3.57578e+06	3.53965e+06	-	-
Lmhn003246	C24H22O13	[M-H]-	Sinapoylcaffeoyltartaric acid	Phenolic acids	Phenolic acids	-	322697	379700	368041	226703	414019	269596	192410	212139	175182	264682	262228	248906	-	-
Zmyp004317	C16H18O8	[M+H]+	(3,4,5-trihydroxytetrahydro-2H-pyran-2-yl)methyl (E)-3-(4-hydroxy-3-methoxyphenyl)acrylate	Phenolic acids	Phenolic acids	-	3.10731e+06	1413655	1.62142e+06	3243190	3.07948e+06	2.13035e+06	2.09559e+06	2.23783e+06	1.59191e+06	1.84882e+06	1.84801e+06	1.95635e+06	-	-
Zmln000668	C19H26O15	[M-H]-	Monogalloyl-diglucose	Phenolic acids	Phenolic acids	-	1.83146e+06	4.69757e+06	3.64341e+06	1.90502e+06	1.90867e+06	1.92652e+06	1.76261e+06	2.02486e+06	2.00359e+06	2.1738e+06	2.20763e+06	2.31753e+06	-	-
pmb3072	C22H26O12	[M-H]-	3-O-p-Coumaroylshikimic acid-O-glucoside	Phenolic acids	Phenolic acids	-	824559	425972	602961	913225	1.69739e+06	1.22995e+06	985511	732553	732473	1.00019e+06	938551	950813	-	-
mws0027	C9H10O5	[M-H]-	Syringic acid	Phenolic acids	Phenolic acids	530-57-4	393316	1.44114e+06	1.15727e+06	323213	268740	307345	277427	253836	364441	562188	532970	528282	C10833	-
Wafn002491	C16H18O11	[M-H]-	2-O-Feruloylglucaric Acid	Phenolic acids	Phenolic acids	-	148365	45681.6	74266.6	114934	123932	166673	138323	149565	315773	167685	157191	159552	-	-
Lczn000058	C21H22O13	[M-H]-	6-O-Galloyl-1-O-vanilloyl-β-D-glucose	Phenolic acids	Phenolic acids	-	1.08103e+07	3.3177e+07	2.18339e+07	1.34866e+07	1.14447e+07	1.26818e+07	1.45288e+07	1.8842e+07	1.5056e+07	1.68011e+07	1.59633e+07	1.70419e+07	-	-
Wchn001739	C13H16O10	[M-H]-	3-O-Galloyl-Glucose	Phenolic acids	Phenolic acids	-	3.08324e+07	3.74588e+07	2.01564e+07	2.32342e+07	2.94034e+07	1.93821e+07	3.14213e+07	3.07436e+07	2.75743e+07	2.60254e+07	2.45835e+07	2.61663e+07	-	-
Labn002264	C14H20O8	[M-H]-	Grevilloside G	Phenolic acids	Phenolic acids	791846-69-0	1.11599e+06	3.90253e+06	5.72885e+06	1.93727e+06	1.50838e+06	1.78683e+06	1.47041e+06	1.41354e+06	1.17123e+06	1.88122e+06	1.75805e+06	1.83971e+06	-	-
pmb3056	C16H20O9	[M-H]-	Homovanilloylquinic acid	Phenolic acids	Phenolic acids	-	432102	351438	269604	4.93443e+06	1.77135e+06	3.31898e+06	1.92037e+06	2.24124e+06	2.51352e+06	1.62129e+06	1.72018e+06	1.72887e+06	-	-
pmn001459	C23H32O15	[M-H]-	Sibiricose A6	Phenolic acids	Phenolic acids	241125-75-7	20294.1	49531	83977.5	40172	43754	40164.5	29507.6	48345	26085.4	38988.9	41702.4	39583.1	-	-
Laln006487	C22H26O10	[M-H]-	Benzyl 3,6-dimethoxy-2-{[3,4,5-trihydroxy-6-(hydroxymethyl)oxan-2-yl]oxy}benzoate	Phenolic acids	Phenolic acids	-	1.36745e+07	1.30257e+07	1.09152e+07	1.18984e+07	1.34485e+07	1.54387e+07	1.21825e+07	11907285	1.17526e+07	1.21741e+07	1.22816e+07	1.14906e+07	-	-
Labn003679	C15H20O8	[M-H]-	(E)-caffeyl alcohol 4-O-β-D-glucopyranoside	Phenolic acids	Phenolic acids	-	6.6379e+06	1.43553e+07	8.28048e+06	8.727e+06	6.71377e+06	1.04606e+07	7.35614e+06	7.68865e+06	8.47678e+06	8.00372e+06	8.60104e+06	8.27096e+06	-	-
MWSHC2022	C15H20O10	[M-H]-	Glucosyringic acid	Phenolic acids	Phenolic acids	33228-65-8	1.8886e+06	7.12471e+06	6.40147e+06	2.33073e+06	1.52966e+06	2.51005e+06	2.21453e+06	1.99959e+06	2.56496e+06	3.10866e+06	3.34105e+06	3.20984e+06	-	-
Hmln000873	C13H16O10	[M-H]-	2-O-Galloyl-D-glucose	Phenolic acids	Phenolic acids	-	3.70338e+06	6.80041e+06	5.0201e+06	4.91241e+06	3.69638e+06	4.13862e+06	5.28816e+06	5.20871e+06	6.18225e+06	4.65486e+06	4.48853e+06	4.82602e+06	-	-
Lmyp004477	C17H18O6	[M+H]+	Evofolin B	Phenolic acids	Phenolic acids	168254-96-4	3.82092e+06	2.63542e+06	1.9604e+06	4.06413e+06	4.01196e+06	4.61478e+06	4.30319e+06	5.88149e+06	4.4024e+06	4.13708e+06	3.88432e+06	3.88851e+06	-	-
Zmhn002227	C17H22O10	[M-H]-	4-O-Glucosyl-sinapate	Phenolic acids	Phenolic acids	-	7.19624e+06	6.91311e+06	6.16499e+06	7.07809e+06	3.92706e+06	3.07426e+06	6.03313e+06	6.21821e+06	7.30859e+06	5.81548e+06	5.96957e+06	5551734	C02919	-
Ladn001231	C13H16O13S	[M-H]-	3,5-dihydroxy-4-{[(2s,3r,4s,5s,6r)-3,4,5-trihydroxy-6-[(sulfooxy)methyl]oxan-2-yl]oxy}benzoic acid	Phenolic acids	Phenolic acids	-	1.68996e+07	1.5112e+07	1.58062e+07	1.35814e+07	1.1445e+07	1.39575e+07	1.77505e+07	1.79433e+07	2.23746e+07	1.46055e+07	1.44063e+07	1.54366e+07	-	-
Wcdp009119	C18H30O2	[M+H]+	Elaidolinolenic acid	Phenolic acids	Phenolic acids	28290-79-1	596922	253360	275385	495472	586165	592896	649118	735599	1.35369e+06	581680	596800	553801	-	-
MWS20201	C13H16O10	[M+H]+	1-O-Galloyl-β-D-glucose*	Phenolic acids	Phenolic acids	58511-73-2	1.21099e+06	1.9666e+06	1.7911e+06	1.35026e+06	1.24523e+06	1.53137e+06	1.3464e+06	1.33004e+06	1.33153e+06	1.29249e+06	1.25854e+06	1.19919e+06	C01158	ko00999
Wasn002902	C15H16O10	[M-H]-	O-p-Coumaroylgalactaric acid	Phenolic acids	Phenolic acids	-	4.75118e+06	2.05865e+06	5.92932e+06	2.48705e+07	3.12911e+07	3.55648e+07	2.80364e+07	2.89399e+07	3.09208e+07	2.264e+07	2.10831e+07	2.13813e+07	-	-
Yaan002980	C20H20O14	[M-H]-	2,3-di-O-galloyl--d-glucose*	Phenolic acids	Phenolic acids	-	375305	1.24196e+06	1.10745e+06	503428	288525	352067	661930	749160	604550	724606	679805	676236	-	-
Smnn002694	C19H28O11	[M-H]-	Osmanthuside H[2-(4-Hydroxyphenyl)ethyl-β-D-apiosyl-(1→6)-β-D-glucoside]	Phenolic acids	Phenolic acids	149155-70-4	196783	317549	352646	225675	172277	192810	287921	205800	274865	204095	220618	213509	-	-
mws2108	C16H18O9	[M-H]-	Cryptochlorogenic acid (4-O-Caffeoylquinic acid)*	Phenolic acids	Phenolic acids	905-99-7	2.31158e+07	3.2725e+07	2.23358e+07	3.50147e+07	1.08273e+07	2.63887e+07	2.65155e+07	3.81439e+07	3.91457e+07	2.97846e+07	2.82591e+07	2.76011e+07	-	-
Wafn002827	C16H22O9	[M-H]-	Dihydroferulic acid glucoside	Phenolic acids	Phenolic acids	-	7.97158e+06	9.80051e+06	1.05746e+07	8.29844e+06	7.17991e+06	8.16931e+06	1.20328e+07	1.10561e+07	1.75839e+07	8.87221e+06	9.53033e+06	9.47481e+06	-	-
MW0004191	C11H16O2	[M+CH3COO]-	3-tert-Butyl-4-hydroxyanisole	Phenolic acids	Phenolic acids	121-00-6	281142	266695	267498	214564	237090	216233	223347	188210	217712	211563	202246	218950	-	-
pmb3074	C16H18O8	[M-H]-	5-O-p-Coumaroylquinic acid	Phenolic acids	Phenolic acids	1899-30-5	851415	460457	2819310	6.78604e+06	5.70305e+06	7.19454e+06	4.64124e+06	5.41789e+06	6.05512e+06	4.2853e+06	3.95806e+06	4.08824e+06	C12208	ko00940,ko00941,ko00945,ko01110
pmn001421	C16H18O8	[M-H]-	3-O-p-Coumaroylquinic acid	Phenolic acids	Phenolic acids	87099-71-6	4.95931e+06	3.10225e+06	3.35331e+06	9.91787e+06	6.97848e+06	7.8937e+06	6.49337e+06	7.60802e+06	8.90014e+06	6.8281e+06	6.7234e+06	6.31485e+06	-	-
MWSslk149	C8H8O4	[M+H]+	5-Methoxysalicylic acid	Phenolic acids	Phenolic acids	2612-02-4	809631	1.52331e+06	1.69786e+06	704637	1.31397e+06	824654	416194	312287	234573	911967	840164	876950	-	-
Lmtn003441	C15H20O7	[M-H]-	2-Acetyl-3-hydroxyphenyl-1-O-glucoside	Phenolic acids	Phenolic acids	-	71346.7	60020	38677.3	36901.3	54210.7	41360.7	148415	36901.3	66645.7	51008	47035.4	48577	-	-
Hmbp003234	C12H14O6	[M+H]+	1-O-Caffeoylglycerol	Phenolic acids	Phenolic acids	-	55131.7	69075.5	111299	73869	57038.2	79947.8	84426.1	121538	62791.7	65520.5	63507.9	68860.9	-	-
pmn001516	C14H14O9	[M-H]-	5-Galloylshikimic acid	Phenolic acids	Phenolic acids	95719-51-0	7.25405e+06	3.46656e+06	3.6476e+06	3.58454e+06	5.52629e+06	4.94957e+06	5.23141e+06	6.75572e+06	6.48138e+06	5.03969e+06	5.4077e+06	5.03137e+06	-	-
pmb3066	C22H26O12	[M-H]-	5-O-p-Coumaroylshikimic acid O-glucoside	Phenolic acids	Phenolic acids	-	2.26472e+06	1.27096e+06	1.2716e+06	2.08444e+06	2.14344e+06	2.50905e+06	1.93091e+06	1.37342e+06	1.66151e+06	1.80785e+06	1.87108e+06	1.96854e+06	-	-
HJN037	C8H8O5	[M-H]-	3,5-Dihydroxy-4-methoxybenzoic acid; 4-O-Methylgallic Acid*	Phenolic acids	Phenolic acids	4319-02-2	3.91941e+06	8.44007e+06	5.18211e+06	4.96398e+06	3540801	3.94973e+06	4.11073e+06	4.01673e+06	4.56014e+06	4.52578e+06	4.63261e+06	4.91929e+06	-	-
MWSHC2062	C16H20O9	[M-H]-	Ferulic β-glucoside	Phenolic acids	Phenolic acids	14364-12-6	3.13456e+06	2807410	3.62297e+06	2.15966e+07	1.02485e+07	1.63122e+07	1.12834e+07	1.27872e+07	1.60468e+07	1.05017e+07	9.95784e+06	9.63353e+06	-	-
Zmln000899	C15H20O9	[M-H]-	Syringaldehyde-4-O-glucoside	Phenolic acids	Phenolic acids	-	1.12063e+06	1.29496e+06	1.1364e+06	1.90665e+06	1.12373e+06	1.78254e+06	1.50426e+06	1.28721e+06	1.3364e+06	1.41938e+06	1.40751e+06	1.30896e+06	-	-
Lmtn002324	C19H28O11	[M-H]-	Benzyl-(2''-O-glucosyl)glucoside*	Phenolic acids	Phenolic acids	-	2586620	3.10104e+06	1.27088e+06	2.14853e+06	1.3781e+06	1.44503e+06	1.46783e+06	1904320	1.15493e+06	1.24768e+06	1.15744e+06	1.15659e+06	C17564	-
MWSmce387	C8H8O5	[M-H]-	3-O-Methylgallic acid	Phenolic acids	Phenolic acids	3934-84-7	415992	737246	507378	581644	289701	449513	402129	415068	571145	483956	447695	449849	C05616	-
Zmxn003874	C31H38O11	[M-H]-	7,8-Dihydro-Buddlenol B(threo)	Phenolic acids	Phenolic acids	-	1.4124e+06	453569	805558	1.16953e+06	1.67543e+06	809697	1.4202e+06	1.88962e+06	1.4368e+06	1.14805e+06	1.25061e+06	1.22707e+06	-	-
pmb3142	C13H16O8	[M-H]-	Salicylic acid-2-O-glucoside	Phenolic acids	Phenolic acids	10366-91-3	1.31428e+07	1.13171e+07	1.27987e+07	1.00281e+07	1.47636e+07	1.31498e+07	1.02003e+07	1.11622e+07	1.15063e+07	1.13276e+07	1.20358e+07	1.23652e+07	-	-
Lmgn001670	C7H6O3	[M-H]-	Salicylic acid	Phenolic acids	Phenolic acids	69-72-7	168624	136538	142538	178187	155041	222046	185501	155563	192440	163382	149472	157713	C00805	ko00996,ko01100,ko01110,ko04075
Labn004625	C19H28O10	[M-H]-	2-Phenylethyl beta-primeveroside	Phenolic acids	Phenolic acids	129932-48-5	1.36609e+06	2.6834e+06	2.11196e+06	2.03508e+06	1.88841e+06	1.76848e+06	2.23154e+06	2.78325e+06	2.53813e+06	2.13841e+06	1.95698e+06	2.07034e+06	-	-
Lmsn003318	C16H20O9	[M-H]-	1-O-Feruloyl-β-D-glucose	Phenolic acids	Phenolic acids	7196-71-6	7.48829e+06	3.29109e+06	6.27319e+06	8.39593e+06	1.15157e+07	6.54386e+06	9.53159e+06	9.14798e+06	5.87907e+06	7.63564e+06	7.99357e+06	8.35375e+06	C17759	-
pme3443	C11H12O4	[M-H]-	Sinapinaldehyde	Phenolic acids	Phenolic acids	4206-58-0	894827	217878	361569	364136	499250	272424	820560	553227	621328	497516	488826	456034	C05610	ko00940,ko01100,ko01110
pmn001573	C23H26O10	[M-H]-	Desmethylagrimonolide-6-O-glucoside*	Phenolic acids	Phenolic acids	1257408-55-1	1.12278e+06	762165	1.05126e+06	1.17665e+06	1.04084e+06	837098	1.278e+06	2.09908e+06	1.23801e+06	1.00656e+06	995710	924733	-	-
Wmyn000212	C20H22O12	[M-H]-	4-hydroxy-3-methoxyphenyl 1-O-β-D-(6'-O-galloyol)-glucopyranoside*	Phenolic acids	Phenolic acids	-	2.48353e+06	4.25507e+06	4.04316e+06	3.22959e+06	2.42076e+06	2.16398e+06	2.84621e+06	3.69873e+06	4.41251e+06	2.8369e+06	3.11005e+06	2.96675e+06	-	-
MWS2069	C8H10O2	[M+H]+	2-Methoxy-4-methylphenol	Phenolic acids	Phenolic acids	93-51-6	253223	239184	201152	233962	253640	213339	170821	155757	233324	222042	205719	223973	-	-
HJN003	C17H22O10	[M-H]-	1-O-Sinapoyl-β-D-glucose	Phenolic acids	Phenolic acids	-	1.40623e+06	999115	1.83474e+06	1.86518e+07	4.72858e+06	1.15771e+07	1.11991e+07	9.51453e+06	1.15966e+07	7.91988e+06	7.21747e+06	7.59961e+06	C01175	ko00940,ko01110
Wmyn000216	C14H18O10	[M-H]-	methyl 6-O-galloyl-β-D-gluco-pyranosid	Phenolic acids	Phenolic acids	-	1.07522e+06	2.12641e+06	1.80446e+06	963640	1.35984e+06	1.28709e+06	1.15293e+06	1.51213e+06	914064	1.30342e+06	1.25327e+06	1.18725e+06	-	-
Lmbn004790	C11H14O4	[M-H]-	Methyl 3-(3-hydroxy-4-methoxyphenyl)propanoate*	Phenolic acids	Phenolic acids	129150-61-4	175432	148940	148357	214051	223892	152844	318247	138540	284011	181905	197558	197366	-	-
Lmhn003689	C23H20O11	[M-H]-	p-Coumaroylferuloyltartaric acid	Phenolic acids	Phenolic acids	-	37098.3	44339.2	45736	43790.6	32787.1	23118.2	35986.5	27930.5	38509.8	38307.9	38315.9	35282.6	-	-
Lmfn001209	C27H24O18	[M-H]-	1,3,6-Tri-O-galloyl-β-D-glucose	Phenolic acids	Phenolic acids	18483-17-5	358208	1.99454e+06	1.77106e+06	511383	269558	312668	732311	691276	776387	818146	748577	763865	C17458	-
Jmwn006041	C26H32O11	[M-H]-	(7S,8R)-dehydrodiconiferylalcohol-9'-O-β-D-glucopyranoside	Phenolic acids	Phenolic acids	-	877446	913751	519571	1.53662e+06	867807	1.41527e+06	668650	924443	1.01147e+06	1.05119e+06	987728	957764	-	-
pmn001420	C15H18O9	[M-H]-	1-O-Caffeoyl-β-D-glucose*	Phenolic acids	Phenolic acids	14364-08-0	632276	372176	546709	1260560	662234	612665	539797	624479	473884	547206	515406	498223	C10433	-
Lmfn001258	C20H20O13	[M-H]-	Maplexin D (2,4-Di-O-Galloyl-1,5-Anhydro-D-Glucitol)*	Phenolic acids	Phenolic acids	1355573-86-2	2.1882e+06	3.0728e+06	2.08124e+06	4395145	1.57291e+06	4666925	2.66446e+06	4.31443e+06	5215485	2.49818e+06	2.53189e+06	2.72786e+06	-	-
MWS1839	C9H10O3	[M-H]-	Ethylparaben	Phenolic acids	Phenolic acids	120-47-8	43012.3	39030	46395.3	34815.9	48415.3	54335.5	63103.6	27948.5	38288.7	50582.6	48052.9	45951.7	-	-
Hmtn001288	C9H10O4	[M-H]-	Methyl 2,4-dihydroxyphenylacetate*	Phenolic acids	Phenolic acids	67828-42-6	58287.4	68296.9	64222.9	74788.9	73469.3	92189.8	64290.3	110584	105428	62224.3	56695.8	60883.7	-	-
MWSHC20125	C16H16O8	[M-H]-	5-O-Caffeoylshikimic acid	Phenolic acids	Phenolic acids	73263-62-4	3.27935e+06	2.01415e+06	2.65672e+06	4.98168e+06	4.24174e+06	6.17866e+06	6.47301e+06	4.92869e+06	5.88391e+06	4.47915e+06	4.59652e+06	4.18199e+06	-	-
Li512113	C20H20O12	[M-H]-	Maleoyl-caffeoylquinic acid	Phenolic acids	Phenolic acids	-	36675	74818	83600.9	72533.8	68590.7	47663.4	48894.7	31481	53238.2	63866.9	68417.6	70230.2	-	-
pme1816	C16H18O9	[M-H]-	Neochlorogenic acid (5-O-Caffeoylquinic acid)*	Phenolic acids	Phenolic acids	906-33-2	617767	696572	592886	854409	732113	637979	898454	1.06997e+06	866182	772485	718980	790035	C17147	-
Ymjm000154	C13H18O7	[M-H]-	Salicin	Phenolic acids	Phenolic acids	138-52-3	167058	540461	424754	331633	166661	323169	246570	214093	199337	303454	283215	311793	C01451	ko00010
Lmmn001643	C9H8O3	[M-H]-	2-Hydroxycinnamic acid*	Phenolic acids	Phenolic acids	583-17-5	189875	114249	80724.6	188918	350172	223211	225391	268499	264085	214501	219280	235469	C01772	ko00360,ko00999,ko01100,ko01110
MWSslk066	C8H8O4	[M+H]+	3-Hydroxy-4-methoxybenzoic acid; Isovanillic Acid	Phenolic acids	Phenolic acids	645-08-9	149097	333730	203077	137078	132495	141739	128567	124866	138405	143803	130362	135706	-	-
Zblp002750	C10H12O3	[M+H]+	Methyl-3-(3-hydroxyphenyl)Propionate	Phenolic acids	Phenolic acids	61389-68-2	1.56777e+06	1.38946e+06	343755	1.63696e+06	1.58438e+06	1.78128e+06	1.70068e+06	1.2592e+06	2.1477e+06	1.86165e+06	1.76177e+06	1.68679e+06	-	-
Wasn002933	C16H22O10	[M-H]-	1-O-(3,4,5-Trimethoxybenzoyl)-B-D-Glucopyranoside	Phenolic acids	Phenolic acids	-	1.20929e+06	4.30735e+06	4.08068e+06	2.53403e+06	2.08789e+06	2.10279e+06	2.70982e+06	1.38733e+06	2.55088e+06	2.26958e+06	2.45403e+06	2.24249e+06	-	-
pme1439	C9H8O3	[M+H]+	p-Coumaric acid	Phenolic acids	Phenolic acids	501-98-4	470837	1085795	1.41288e+06	379680	554415	1.45821e+06	1.16605e+06	1.1107e+06	245716	1.09098e+06	1.20504e+06	1.14344e+06	C00811	ko00130,ko00350,ko00940,ko00950,ko01100,ko01110
WaYn002313	C16H22O10	[M-H]-	Homosyringic Acid 4'-O-Glucoside	Phenolic acids	Phenolic acids	-	1.26509e+06	2.39564e+06	3.81898e+06	1.96224e+06	1589313	1.76156e+06	1.3646e+06	1.26087e+06	1.79816e+06	2.00619e+06	1.83864e+06	1.83889e+06	-	-
Lmqn005404	C20H20O12	[M-H]-	4-Hydroxybenzoyl-1-O-(6''-O-galloyl)glucoside	Phenolic acids	Phenolic acids	-	1.82799e+06	515455	328353	4.4168e+06	851364	3.17841e+06	1.42141e+06	7.57143e+06	2.40093e+06	2.10122e+06	2.15594e+06	2.31857e+06	-	-
MWS2058	C8H8O3	[M-H]-	3-Methylsalicylic Acid	Phenolic acids	Phenolic acids	83-40-9	71024.6	83718.1	81074.5	81099	73892.1	85854.1	65016.4	69179.6	82848.9	78656.5	86386.1	86108.2	C14088	-
Lmxp001668	C9H10O2	[M+H]+	2-Methoxy-4-ethenylphenol	Phenolic acids	Phenolic acids	7786-61-0	552515	357371	623398	407544	485578	521854	433301	361625	384995	496087	464049	447502	C17883	-
pmb2871	C13H16O9	[M-H]-	1-O-Gentisoyl-β-D-glucoside*	Phenolic acids	Phenolic acids	23445-11-6	1.05891e+06	6.16601e+06	9.37795e+06	1.02596e+06	2.01335e+07	2.86518e+07	2.3511e+07	3.23515e+07	1.01913e+06	773054	832075	859211	-	-
pmn001367	C13H16O9	[M-H]-	Protocatechuic acid-4-O-glucoside*	Phenolic acids	Phenolic acids	-	1.05891e+06	6.16601e+06	9.37795e+06	1.02596e+06	2.01335e+07	2.86518e+07	2.3511e+07	3.23515e+07	1.01913e+06	773054	832075	859211	-	-
pmn001533	C26H30O19	[M-H]-	2-O-Di-gallic acyl-Glucoside-Glucoside	Phenolic acids	Phenolic acids	-	62709.6	247442	143249	69278.3	69833.8	145080	104694	73885.6	89040.3	118765	106781	111270	-	-
mws0024	C7H6O5	[M-H]-	Gallic acid	Phenolic acids	Phenolic acids	149-91-7	3.1969e+07	3.43478e+07	2.55994e+07	3.54717e+07	3.04784e+07	3.34629e+07	3.1148e+07	2.68659e+07	4.01294e+07	3.17659e+07	2.89959e+07	2.89493e+07	C01424	ko00999
Lmsn003628	C23H32O15	[M-H]-	6'-O-Sinapoylsucrose*	Phenolic acids	Phenolic acids	-	55425.5	188492	151997	243482	41196	109858	111991	89510.9	99502.6	118828	107007	115999	-	-
Lhhp120814	C10H12O2	[M+H]+	Eugenol	Phenolic acids	Phenolic acids	97-53-0	2.54745e+06	1848590	2.03879e+06	2.22997e+06	2.09395e+06	2.36755e+06	1.88484e+06	1.46496e+06	1.8319e+06	1.92856e+06	2.14659e+06	2.00609e+06	C10453	ko00940
Lmhn003799	C24H22O12	[M-H]-	Feruloylferuloyltartaric acid	Phenolic acids	Phenolic acids	-	168348	68886.3	124893	96244.7	152439	133433	100083	232743	87161.4	150778	142771	135072	-	-
Lmtn002233	C15H20O8	[M-H]-	Androsin	Phenolic acids	Phenolic acids	531-28-2	2.275e+06	3.3959e+06	3.40933e+06	3.48238e+06	3.15386e+06	2.63832e+06	2.97295e+06	2.868e+06	3.19541e+06	2.63909e+06	2.80137e+06	2.9505e+06	-	-
pmn001690	C16H24O7	[M-H]-	3-Hydroxy-4-isopropylbenzylalcohol-3-O-glucoside	Phenolic acids	Phenolic acids	-	1.46372e+06	1.10565e+06	929583	1.38401e+06	1.38871e+06	1.61591e+06	1.39772e+06	1.67733e+06	1.5209e+06	1.4261e+06	1.31861e+06	1.47321e+06	-	-
WaYn006121	C23H26O10	[M-H]-	Salicin 7-O-Ferulate	Phenolic acids	Phenolic acids	-	2.4384e+06	2.94676e+06	1.92369e+06	2.03983e+06	2.32558e+06	2.31319e+06	2.21057e+06	2.0166e+06	1.93914e+06	2.15637e+06	1.93656e+06	1.99124e+06	-	-
Zmhn001358	C13H16O8	[M-H]-	4-O-Glucosyl-4-hydroxybenzoic acid	Phenolic acids	Phenolic acids	-	1.05641e+07	5.40381e+06	5.78339e+06	2.00348e+07	1.50367e+07	2.31824e+07	1.52397e+07	2.94519e+07	1.7055e+07	1.48165e+07	1.35872e+07	1.33535e+07	-	-
Lmzn001582	C18H28O9	[M-H]-	5'-Glucosyloxyjasmanic acid	Phenolic acids	Phenolic acids	-	194104	291269	222867	261784	330773	169393	235222	247880	586077	254448	254603	230087	-	-
Lmmn000774	C15H20O9	[M-H]-	Dihydrocaffeoylglucose*	Phenolic acids	Phenolic acids	-	5.89023e+06	8.46474e+06	8.48482e+06	6.17993e+06	5.43469e+06	6.25589e+06	6.45782e+06	5.84589e+06	7.5714e+06	6.64226e+06	6.83986e+06	6.11534e+06	-	-
Hmgn002038	C29H34O16	[M-H]-	β-Oxoacteoside	Phenolic acids	Phenolic acids	-	4.50179e+06	4.75032e+06	3.09027e+06	6.94399e+06	4.24213e+06	6.87074e+06	5.943e+06	5.88822e+06	4.94725e+06	5.03994e+06	5.39762e+06	4.81603e+06	-	-
Lmyp003371	C7H8O2	[M+H]+	3,5-Dihydroxytoluene	Phenolic acids	Phenolic acids	504-15-4	192055	252685	373695	246826	180340	204017	282291	181729	180373	255012	231403	230772	C00727	-
pme2598	C8H8O4	[M-H]-	3,4-Dihydroxybenzeneacetic acid*	Phenolic acids	Phenolic acids	102-32-9	1.45213e+06	2.25873e+06	2.08665e+06	3.3768e+06	2.15032e+06	2.87317e+06	2.90072e+06	2.23777e+06	2.91041e+06	2.31615e+06	2.53082e+06	2.26804e+06	C01161	ko00350,ko01100
MWSmce675	C12H16O7	[M-H]-	Arbutin	Phenolic acids	Phenolic acids	497-76-7	9.02136e+06	3.49726e+06	4.39831e+06	6.67125e+06	9.64133e+06	1.01521e+07	7.21267e+06	8.65763e+06	8.75184e+06	6.46985e+06	7.24656e+06	7.08113e+06	C06186	ko00010
Jmwp003339	C14H20O6	[M+H]+	2-Phenylethy-1-O-β-D-glucoside	Phenolic acids	Phenolic acids	18997-54-1	66699.9	256228	286027	326349	342220	510964	233574	145080	73029	272345	304632	299065	-	-
pme0282	C8H6O4	[M-H]-	Phthalic acid	Phenolic acids	Phenolic acids	88-99-3	55627.1	102125	103210	73031.7	90788	126535	79105.4	70752.3	131499	94149.8	97027.2	105483	C01606	ko01100,ko02010
Lmcn004052	C33H40O13	[M-H]-	Buddlenol D	Phenolic acids	Phenolic acids	97465-75-3	237304	101782	149936	119317	384789	184053	139733	160390	125395	156056	147451	166238	-	-
MWS1875	C10H8O	[M-H]-	2-Naphthol*	Phenolic acids	Phenolic acids	135-19-3	39389.7	28920.7	35599.7	22642.8	37219.6	34901.1	32228.7	21399.1	24816.4	26015.9	29365.1	27731.7	C11713	-
pmb0758	C24H26O11	[M+H]+	Anisic acid-O-feruloyl glucoside	Phenolic acids	Phenolic acids	-	1.18193e+06	1.10766e+06	2.67557e+06	3.61377e+06	2.8463e+06	6.96103e+06	2.90117e+06	2.61254e+06	1.98659e+06	2.79216e+06	3.08775e+06	2.77674e+06	-	-
Zmhn000892	C13H18O8	[M-H]-	4-O-Glucosyl-3,4-dihydroxybenzyl alcohol	Phenolic acids	Phenolic acids	-	3.03502e+06	492058	1.66123e+06	2.18247e+06	3.10105e+06	3.3203e+06	2.37103e+06	2.42233e+06	2.46708e+06	2.36e+06	2.59524e+06	2.31889e+06	-	-
Hmln003529	C18H26O10	[M-H]-	Benzyl β-primeveroside	Phenolic acids	Phenolic acids	130622-31-0	2.81759e+06	3.24363e+06	3.07306e+06	4.52923e+06	2.3036e+06	3.38677e+06	2.83234e+06	3.03041e+06	3.41224e+06	3.14664e+06	3.55402e+06	3.43753e+06	-	-
MWSmce490	C8H8O4	[M-H]-	2',4',6'-Trihydroxyacetophenone	Phenolic acids	Phenolic acids	480-66-0	193531	155987	98904.8	87849.9	144727	115097	124059	119123	104995	110503	115132	101785	C21895	-
ML10179289	C8H10O	[M-H2O+H]+	2-Phenylethanol	Phenolic acids	Phenolic acids	60-12-8	7.26819e+06	2.10637e+06	2.69258e+06	6.4072e+06	8.15261e+06	7.43276e+06	1.05769e+07	1.43127e+07	1.14802e+07	8.48067e+06	7.80255e+06	7.50535e+06	C05853	ko00360
Zmgn004894	C8H8O3	[M-H]-	Methyl 4-hydroxybenzoate	Phenolic acids	Phenolic acids	99-76-3	73149	67180.2	56983.1	38757.9	62144.5	40591	65288.6	65473.1	75368.9	50457.6	55507.9	49300.2	-	-
pmn001629	C20H20O14	[M-H]-	Digalloylglucose*	Phenolic acids	Phenolic acids	-	2.26347e+06	6.74491e+06	1.10671e+06	2.40611e+06	2.13895e+06	2.00624e+06	3.79713e+06	3.03146e+06	5.08054e+06	2.76121e+06	3.13779e+06	2.96198e+06	-	-
Lmmn003663	C14H18O9	[M-H]-	5-Glucosyloxy-2-Hydroxybenzoic acid methyl ester	Phenolic acids	Phenolic acids	-	1.81445e+06	2.60843e+06	2.38532e+06	1.2835e+06	2.04721e+06	1.54582e+06	1.86101e+06	1.81736e+06	1.35701e+06	1.74214e+06	1.96535e+06	1.94204e+06	-	-
pmb3062	C17H22O10	[M-H]-	1-O-Eudesmoylquinic acid	Phenolic acids	Phenolic acids	-	74597.9	101373	77027.2	136649	30778.3	116215	108900	105752	120566	82666.4	79159.6	89916.2	-	-
Wmyn000214	C20H20O13	[M-H]-	gentisic acid 5-O-β-D-(6'-O-galloyl)-gluco-pyranoside	Phenolic acids	Phenolic acids	-	1.43299e+07	1.56348e+07	1.09989e+07	1.49246e+07	9.23167e+06	1.57022e+07	1.70934e+07	2.83075e+07	1.85362e+07	1.65042e+07	1.6965e+07	1.49457e+07	-	-
MWSprf147	C14H18O8	[M+H]+	Glucovanillin	Phenolic acids	Phenolic acids	494-08-6	845419	1.26078e+07	5.41067e+06	2.16168e+06	734626	1.01645e+06	2.33465e+06	3.90294e+06	2.76523e+06	2.08365e+06	2.37515e+06	2.21062e+06	C19808	-
Cmjn004337	C18H26O10	[M-H]-	Benzyl-(2''-O-xylosyl)glucoside	Phenolic acids	Phenolic acids	-	2.66384e+06	3.26368e+06	2.71399e+06	4.03553e+06	2.39396e+06	3.00131e+06	3.40851e+06	3.75512e+06	3.42735e+06	3.44844e+06	3.0237e+06	3.29579e+06	-	-
Zbdn001947	C13H18O8	[M-H]-	Isotachioside*	Phenolic acids	Phenolic acids	31427-08-4	8.55175e+06	4.31554e+06	6.36082e+06	1.38858e+07	9.66779e+06	1.55521e+07	7.57062e+06	1.93266e+07	1.97352e+07	1.47436e+07	1.66309e+07	1.50089e+07	-	-
mws0014	C10H10O4	[M-H]-	Ferulic acid	Phenolic acids	Phenolic acids	537-98-4	622176	534813	288866	307216	433618	229397	370268	321299	405812	332816	376233	372697	C01494	ko00940,ko01100,ko01110
MWS3046	C9H10O4	[M-H]-	3-(3-Hydroxyphenyl)-3-hydroxypropanoic acid	Phenolic acids	Phenolic acids	3247-75-4	325958	317506	339284	270953	304661	292263	290316	365049	462181	363257	361070	405808	-	-
mad2085	C22H18O11	[M-H]-	Caffeoyl-p-coumaroyltartaric acid	Phenolic acids	Phenolic acids	-	92804.7	102440	135666	131931	135531	128646	113435	118582	114500	92781.8	105706	102519	-	-
Lmfn000604	C13H16O10	[M-H]-	6-O-Galloyl-β-D-glucose*	Phenolic acids	Phenolic acids	13186-19-1	3.24966e+06	1.24871e+07	1.09591e+07	2.14235e+06	2.75526e+06	1.98801e+06	3.83224e+06	3.55015e+06	2.08992e+06	4.64573e+06	5.2346e+06	5.23072e+06	-	-
mws1212	C11H12O4	[M+H]+	Ferulic acid methyl ester	Phenolic acids	Phenolic acids	2309-07-1	774492	489894	596286	618373	978537	575001	776245	836571	682877	720705	641487	724464	-	-
mws1200	C10H10O3	[M-H]-	p-Coumaric acid methyl ester	Phenolic acids	Phenolic acids	19367-38-5	93963.9	55663.9	48067.2	91065.1	108390	85061.2	98127.6	91193.9	142976	105434	92956.9	95463.6	-	-
NK10264324	C6H6O3	[M+H]+	Phloroglucinol; 1,3,5-Benzenetriol	Phenolic acids	Phenolic acids	108-73-6	1.56191e+06	1.2175e+06	382858	2.85852e+06	423404	1.43776e+06	1.68729e+06	2.04724e+06	2.36117e+06	1.61376e+06	1.40783e+06	1.55453e+06	C02183	ko01100
pmb1587	C13H18O2	[M+H]+	4-Hydroxy-3,5-diisopropylbenzaldehyde	Phenolic acids	Phenolic acids	10537-86-7	401738	167094	222741	291840	253006	243194	318004	265462	279311	326549	296107	285903	-	-
pmn001671	C23H32O15	[M-H]-	Furanofructosyl-α-D-(6-mustard acyl)glucoside*	Phenolic acids	Phenolic acids	-	39911.9	226716	95659.5	177643	31854.1	127367	102820	89517.9	61274.4	89034.1	101657	91863.8	-	-
MWSslk097	C10H10O4	[M+H]+	Dimethyl phthalate	Phenolic acids	Phenolic acids	131-11-3	9.82136e+06	9.98708e+06	9.03837e+06	5.66038e+06	9.42487e+06	9.51741e+06	1.0104e+07	8.32697e+06	9.6982e+06	9.72087e+06	9.53282e+06	8.51106e+06	C11233	-
pmn001320	C12H14O5	[M-H]-	1-O-p-Cumaroylglycerol	Phenolic acids	Phenolic acids	106055-11-2	21675	46423	49491.8	9174.3	10005	6670	14248.9	14886.6	15339	23384.8	25643.5	22331.2	-	-
WaYn005387	C22H24O10	[M-H]-	Populoside	Phenolic acids	Phenolic acids	-	436774	1.02629e+06	814848	399950	351174	428572	385424	401661	507327	507430	585549	548706	-	-
Lmln001195	C14H18O7	[M-H]-	Picein (4-Acetylphenyl-glucoside)	Phenolic acids	Phenolic acids	530-14-3	229666	202735	139761	552549	267655	533517	294559	253768	223200	285630	319940	327207	C10720	-
pmn001526	C20H20O14	[M-H]-	1,6-Di-O-galloyl-β-D-glucose	Phenolic acids	Phenolic acids	-	1.98636e+06	2.20955e+07	1.51986e+07	2.54702e+06	2.24713e+06	2.00586e+06	4.03403e+06	3.89119e+06	3.39016e+06	8.23167e+06	7.7695e+06	7.13248e+06	C04101	-
mws0749	C7H6O3	[M-H]-	4-Hydroxybenzoic acid	Phenolic acids	Phenolic acids	99-96-7	1.19531e+06	871392	790901	736430	1.45129e+06	1.15712e+06	929547	957992	673737	1.02154e+06	1.03822e+06	907804	C00156	ko00130,ko00790,ko01100,ko01110,ko01240
pma0110	C18H22O10	[M+H]+	4-O-Sinapoylquinic acid	Phenolic acids	Phenolic acids	-	65827.8	43970	65399.6	127859	50015	99708.4	110819	26967.4	96764.2	47813.6	55015	53279.2	-	-
Jmwn004308	C30H38O15	[M-H]-	4-Dihydroxyphenethoxy-8-O-β-D-[6-O-(4-O-β-D-glucopyranosyl)-feruloyl]glucopyranoside	Phenolic acids	Phenolic acids	-	1.71388e+06	1.43803e+06	1.47079e+06	3.94589e+06	1.59913e+06	3.63797e+06	2.22663e+06	2.72452e+06	2.5647e+06	2.29646e+06	2.55113e+06	2.64825e+06	-	-
Lmbn001930	C7H6O2	[M-H]-	2-Hydroxybenzaldehyde (Salicylaldehyde)	Phenolic acids	Phenolic acids	90-02-8	27545.5	63779.4	50320.8	30415.1	41510.2	35386	29945.1	37252.3	38592.1	43442.9	39288	37805	C06202	ko01100
Hmsn002272	C15H20O8	[M-H]-	Demethyl coniferin	Phenolic acids	Phenolic acids	-	527903	291485	302321	253800	591288	513099	407916	529745	212234	348143	403454	376203	-	-
Zbfn002690	C13H16O8	[M-H]-	1-(4-Hydroxybenzoyl)Glucose; 25545-07-7	Phenolic acids	Phenolic acids	-	3.30959e+06	1.66811e+06	1.67979e+06	9.21801e+06	5.18606e+06	23898885	5.5142e+06	1.51242e+07	7.40027e+06	5.81126e+06	5.71243e+06	6.52627e+06	-	-
Wafn002081	C12H14O8	[M-H]-	Dihydroxybenzoyl xyloside	Phenolic acids	Phenolic acids	-	149100	66431.3	58661.7	190488	108917	218682	124849	189983	158964	141340	158729	138848	-	-
Hmqn000843	C13H18O8	[M-H]-	Tachioside*	Phenolic acids	Phenolic acids	109194-60-7	1.69696e+07	8.49957e+06	1.17598e+07	1.35656e+07	1.75078e+07	1.51032e+07	1.45585e+07	1.74241e+07	1.84256e+07	1.47178e+07	1.6397e+07	1.42523e+07	-	-
Jmwn002117	C14H20O9	[M-H]-	2-(3,4-dihydroxyphenyl)ethanediol 1-O-β-D-glucopyranoside	Phenolic acids	Phenolic acids	-	6.44426e+06	5.22415e+06	7.54143e+06	7.04307e+06	6.87425e+06	6.53971e+06	8.65314e+06	6.49953e+06	8.42064e+06	7.25402e+06	6.23794e+06	6.8183e+06	-	-
MWSslk184	C34H42O19	[M-H]-	3,6'-Disinapoylsucrose	Phenolic acids	Phenolic acids	139891-98-8	39240.8	19614.2	27260.1	18763.3	40283.7	35964.3	32608.9	35410.9	26034.6	26699.8	30519.3	30515.5	-	-
Lmqp002115	C10H12O5	[M+H]+	Methyl Syringate	Phenolic acids	Phenolic acids	884-35-5	938972	805745	1.18537e+06	673826	932030	1781075	845650	577759	672915	789032	862287	741939	-	-
Zbyn001562	C14H16O10	[M-H]-	3-Galloylquinic acid	Phenolic acids	Phenolic acids	17365-11-6	2.17025e+06	2.91303e+06	1.98637e+06	3.46477e+06	2.00455e+06	2.154e+06	3.61942e+06	3.59974e+06	3.97614e+06	2.84132e+06	2.7647e+06	2.45471e+06	C10834	-
Lmzn001925	C12H16O5	[M-H]-	3,4'-Dihydroxy-3'-methoxybenzenepentanoic acid	Phenolic acids	Phenolic acids	-	205050	189884	153201	125934	153454	164196	141343	107407	113385	187691	163290	166808	-	-
MWSmce230	C8H8O5	[M-H]-	Methyl gallate*	Phenolic acids	Phenolic acids	99-24-1	3.90584e+06	8.77137e+06	5.61283e+06	4.79855e+06	3.83238e+06	4.13303e+06	4.52746e+06	4.05982e+06	5.33976e+06	4.59294e+06	4.45263e+06	5.14265e+06	-	-
pmp000261	C14H18O10	[M+H]+	Methyl 6-O-galloyl-glucoside	Phenolic acids	Phenolic acids	-	62871.4	80025	120977	145327	148445	87061.9	62403.9	162870	73578	103097	94850.2	110734	-	-
MWS5206	C9H10O4	[M-H]-	4-Hydroxyphenyllactic Acid*	Phenolic acids	Phenolic acids	306-23-0	60866.8	72137.4	79107.6	88441.3	77526.4	52709	86123.4	115933	94760.6	79820.5	81555.5	91936.5	C03672	-
pmb0475	C29H34O18	[M+H]+	Gallic acid-4-O-(6'''-feruloyl)sophoroside	Phenolic acids	Phenolic acids	-	184130	243223	308112	372470	181311	395734	273156	404668	514265	250378	256120	288871	-	-
Lmmn001294	C14H20O9	[M-H]-	Koaburaside*	Phenolic acids	Phenolic acids	41653-73-0	6.68059e+06	5.23406e+06	7.48573e+06	6.76239e+06	6.3143e+06	5.94682e+06	8.08729e+06	6.28155e+06	7.60779e+06	6.88209e+06	5.91861e+06	6.69126e+06	-	-
pmb2620	C11H12O4	[M-H]-	3,4-Dimethoxycinnamic acid	Phenolic acids	Phenolic acids	2316-26-9	77027.4	31627.7	46612.1	82946	113954	75467.4	113880	108279	61879.1	83092.7	75707.6	71161.8	-	-
Zmhn003297	C21H20O14	[M-H]-	3-O-Digalloyl quinic acid	Phenolic acids	Phenolic acids	-	2.21712e+07	3.0864e+07	2.12477e+07	3.46156e+07	2.20851e+07	2.38122e+07	3.26174e+07	4.09209e+07	4.5819e+07	2.94956e+07	2.60305e+07	3.03145e+07	-	-
mws1336	C7H7NO2	[M+H]+	4-Aminobenzoic acid	Phenolic acids	Phenolic acids	150-13-0	8.89034e+06	3.95019e+06	4.03726e+06	3.21384e+07	8.43969e+06	1.92602e+07	1.50655e+07	1.80369e+07	1.64084e+07	1.18592e+07	1.37448e+07	1.35551e+07	C00568	ko00790,ko01100,ko01240
mws2120	C13H8O8	[M-H]-	Brevifolin carboxylic acid	Phenolic acids	Phenolic acids	18490-95-4	1.37988e+07	9.28148e+06	1.02789e+07	1.03212e+07	1.57578e+07	1.32839e+07	1.21947e+07	1.24783e+07	1.03541e+07	1.17768e+07	1.20433e+07	1.36156e+07	-	-
Lmbp000728	C8H8O	[M+H]+	(S)-2-Phenyloxirane	Phenolic acids	Phenolic acids	20780-54-5	1.35268e+06	1.2966e+06	1.35153e+06	987992	1.2213e+06	994423	1.13414e+06	1.14979e+06	914887	1.24369e+06	1.1125e+06	1.0682e+06	C20782	ko01100
Zmhn003082	C15H18O10	[M-H]-	5-O-Galloyl-methyl quinine ester	Phenolic acids	Phenolic acids	-	47180.6	82463.2	59091.2	173633	78401.8	166077	146194	99643.7	155653	113647	98243.2	112779	-	-
pmn001382	C25H24O12	[M-H]-	Isochlorogenic acid A*	Phenolic acids	Phenolic acids	2450-53-5	588876	515782	531199	541366	505201	481303	422169	719535	484798	668656	612090	570236	-	-
Zbfn004397	C24H26O12	[M-H]-	2-O-caffeoyl-5-O-(3-hydroxy-4-phenoxy)-6-acetylglucose	Phenolic acids	Phenolic acids	-	958235	691357	928363	1.02836e+06	1.14166e+06	1059128	911367	1.009e+06	821079	960890	820954	865816	-	-
Zmhn002783	C14H14O9	[M-H]-	5-O-Galloylshikimic acid	Phenolic acids	Phenolic acids	-	1.85269e+06	1.23892e+06	1.14172e+06	1.12603e+06	1.71038e+06	1.45688e+06	1.66443e+06	2.25563e+06	1.91887e+06	1.55635e+06	1.64055e+06	1.39198e+06	-	-
Lman002731	C15H18O9	[M-H]-	Grevilloside F	Phenolic acids	Phenolic acids	1094004-50-8	2.00607e+07	1.17367e+07	1.60761e+07	1.39812e+07	2.0975e+07	1.71991e+07	1.68163e+07	1.68095e+07	1.46408e+07	1.38686e+07	1.43838e+07	1.62176e+07	-	-
MWS1848	C8H8O2	[M-H]-	Phenyl acetate	Phenolic acids	Phenolic acids	122-79-2	59587.6	75510.4	65470.7	98530.6	70713.1	37449.2	57805.6	71930	208326	79294.2	81415.9	92397.5	C00548	-
Lmhn002926	C13H12O7	[M-H]-	p-Coumaroylmalic acid	Phenolic acids	Phenolic acids	-	118804	62707.6	58475.7	72654	94373.6	74946.9	63898	78548.6	62117.1	83234.7	70923.5	80922.9	-	-
Lmsn004092	C23H24O13	[M-H]-	1-O-Galloyl-3-O-Feruloyl-β-D-glucose	Phenolic acids	Phenolic acids	-	2.49492e+06	2.11486e+06	2.3602e+06	1.61533e+06	1.98624e+06	1.94923e+06	1.85253e+06	1.86483e+06	1.95415e+06	2.0004e+06	1.69871e+06	1.92972e+06	-	-
mws2368	C8H10O2	[M-H]-	Tyrosol; 4-Hydroxyphenylethanol	Phenolic acids	Phenolic acids	501-94-0	12450.9	26834.4	22460.2	26839.5	19817.4	27067.2	26705.1	26675	15592.9	18178	20438.5	21480.7	C06044	ko00350,ko01100
mws0117	C9H10O4	[M-H]-	Homovanillic acid; 4-Hydroxy-3-methoxyphenylacetic acid	Phenolic acids	Phenolic acids	306-08-1	812004	1.01304e+06	686876	1.59758e+06	670544	947334	1.52641e+06	1.34769e+06	1.60854e+06	995420	1.02939e+06	1.1655e+06	C05582	ko00350,ko01100
Lmqp002627	C9H10O4	[M+H]+	Vanillic acid methyl ester	Phenolic acids	Phenolic acids	3943-74-6	500073	687832	639383	467816	589898	396863	455929	485442	344714	463238	489042	412964	-	-
pmn001470	C34H40O19	[M-H]-	Arillatose A	Phenolic acids	Phenolic acids	291746-00-4	91374.8	158266	86837.6	135414	99066.8	98040.8	130176	115489	109873	103972	123118	111974	-	-
Lmln010063	C14H22O	[M-H]-	2,6-Di-tert-butylphenol	Phenolic acids	Phenolic acids	128-39-2	3.57066e+06	3.42219e+06	3.71791e+06	3.19076e+06	3.85261e+06	3.70849e+06	3.63754e+06	2.93221e+06	2.8341e+06	3.56461e+06	3.03432e+06	3.49172e+06	-	-
MWS4301	C8H8O3	[M-H]-	3-hydroxyphenylacetic acid	Phenolic acids	Phenolic acids	621-37-4	384288	221142	61032.8	374571	450654	433930	694386	431368	442503	494670	558318	475055	C05593	ko00350,ko00360,ko01100
Lmsn004384	C29H26O16	[M-H]-	1,4-Di-O-galloyl-2-O-p-coumaroyl-β-D-glucose	Phenolic acids	Phenolic acids	-	825488	1.64567e+06	1.53546e+06	1.36995e+06	701998	1.06521e+06	1.15877e+06	1.15202e+06	1.45308e+06	1.26782e+06	1.07756e+06	1.12233e+06	-	-
Lmdn004491	C31H40O15	[M-H]-	Martynoside	Phenolic acids	Phenolic acids	67884-12-2	28879.8	28650.4	45928.8	32391.6	16867.5	51313.5	34346.8	8459.87	1592.18	25687.7	24768.4	21729.2	-	-
mws1078	C7H7NO2	[M+H]+	Anthranilic Acid	Phenolic acids	Phenolic acids	118-92-3	343018	162012	139599	837183	260490	547835	310542	482899	514290	345231	410529	378370	C00108	ko00380,ko00400,ko00996,ko00999,ko01100,ko01110,ko01230
Lmhn003240	C11H10O6	[M-H]-	Benzoylmalic acid	Phenolic acids	Phenolic acids	22138-51-8	279718	267974	278278	264780	315710	289696	248638	239581	256250	285318	265466	239658	-	-
Sacn002893	C17H24O11	[M-H]-	10-acetylmonomelittoside	Phenolic acids	Phenolic acids	-	1.77793e+06	3.6171e+06	5.59058e+06	2.67005e+06	2.64125e+06	2.35587e+06	2.29313e+06	1.62214e+06	1.67891e+06	2.82268e+06	2.3739e+06	2.68215e+06	-	-
Zmhn001793	C15H18O9	[M-H]-	6-O-Caffeoyl-D-glucose*	Phenolic acids	Phenolic acids	-	720102	417392	480954	507008	758621	555794	553831	552231	381747	510019	512169	593370	-	-
Wasn006584	C20H20O11	[M-H]-	1-Galloyl-6-O-Benzoyl Glucose	Phenolic acids	Phenolic acids	-	2.40296e+06	387454	332979	2.51771e+06	2.74865e+06	2.46081e+06	2.52966e+06	3.26937e+06	2.99768e+06	1.78252e+06	2.12293e+06	1.91558e+06	-	-
pme1292	C8H8O4	[M-H]-	Homogentisic acid*	Phenolic acids	Phenolic acids	451-13-8	1.41119e+06	2.63323e+06	2.23055e+06	2.83514e+06	2.21299e+06	2.90105e+06	2.83779e+06	2.46688e+06	3.27541e+06	2.1928e+06	2.54583e+06	2.58511e+06	C00544	ko00130,ko00350,ko01100,ko01240
mws2367	C14H20O7	[M-H]-	Salidroside	Phenolic acids	Phenolic acids	10338-51-9	6.94181e+06	2.23621e+07	1.64086e+07	8.19466e+06	8.62419e+06	7.68807e+06	8.92416e+06	8.27485e+06	8.99563e+06	1.13383e+07	9.52182e+06	1.0845e+07	C06046	ko00350,ko01100
MWSslk083	C9H12O4	[M-H]-	4-Hydroxy-3,5-dimethoxybenzyl alcohol	Phenolic acids	Phenolic acids	530-56-3	22101.6	27611.9	24445.5	20097.7	29492.9	10209.4	11670	6850.29	8340	16675	18340	19997.7	-	-
Hmln002149	C29H36O15	[M-H]-	Acteoside; Verbascoside	Phenolic acids	Phenolic acids	61276-17-3	380495	72147.2	103375	261643	323130	255617	325729	180120	170546	247882	257110	293740	C10501	-
pme0241	C7H6O2	[M+H]+	Benzoic acid	Phenolic acids	Phenolic acids	65-85-0	981842	945008	1.15888e+06	1.0312e+06	1.05236e+06	1.80274e+06	1.09754e+06	1.13031e+06	685876	785618	923960	928000	C00180	ko00996,ko01100,ko01110
WaYn003084	C24H30O13	[M-H]-	Guaiacylglycerol 8-O-(1''-O-Glucosyl)Vanillic Acid Ether	Phenolic acids	Phenolic acids	-	960626	895447	711266	1.4416e+06	573579	608988	1.1803e+06	1.11189e+06	1.63114e+06	946383	791847	916474	-	-
Lmsn005333	C22H22O11	[M-H]-	4-O-Galloyl-1-O-Cinnamoyl-β-D-glucose	Phenolic acids	Phenolic acids	-	424087	261004	209347	444834	70020	593823	397892	497468	436045	348141	346013	406109	-	-
Zahn005516	C10H12O4	[M-H]-	3,4,5-trimethoxybenzaldehyde	Phenolic acids	Phenolic acids	86-81-7	382618	226732	120221	471665	515966	123390	169841	425967	352459	374502	340857	410759	-	-
Wasn002449	C19H26O13	[M-H]-	Protocatechuic acid 1-O-Rutinoside	Phenolic acids	Phenolic acids	-	427984	386879	570047	277165	440441	372528	380010	302488	341491	372639	331726	400681	-	-
ML10177402	C7H7NO3	[M-H]-	4-Aminosalicylic acid	Phenolic acids	Phenolic acids	65-49-6	65964	51770.2	31580.8	136656	115681	147685	69809.7	125511	62480.8	108479	89649.9	99523.5	C02518	-
Hmyn001360	C18H20O4	[M-H]-	Doitungbiphenyl A	Phenolic acids	Phenolic acids	-	1.41595e+07	4.11369e+07	3.37342e+07	1.47959e+07	1.61635e+07	1.3913e+07	1.86365e+07	1.49288e+07	1.64824e+07	2.01148e+07	1.84206e+07	1.66089e+07	-	-
Zmhn001926	C13H16O8	[M-H]-	1-O-Salicyloyl-β-D-glucose	Phenolic acids	Phenolic acids	60517-74-0	9.80188e+06	5.90919e+06	6.68086e+06	2.14567e+07	1.49959e+07	2.22575e+07	1.36209e+07	2.89379e+07	1.72794e+07	1.42962e+07	1.43029e+07	1.68112e+07	-	-
Lmfn001344	C20H20O13	[M-H]-	Maplexin C (2,3-Di-O-Galloyl-1,5-Anhydro-D-Glucitol)*	Phenolic acids	Phenolic acids	-	2846505	1.72199e+06	1.33336e+06	4357340	976424	4142745	2.21329e+06	3.86272e+06	2.75556e+06	1.7934e+06	2.16187e+06	1.91381e+06	-	-
pmb0751	C16H16O7	[M+H]+	Trans-5-O-(p-Coumaroyl)shikimate	Phenolic acids	Phenolic acids	-	13340	27916	38181	72644.4	31675	88705.2	90317.8	77717.3	102903	66685	69882.7	57803.7	C02947	ko00940,ko00941,ko00945,ko01100,ko01110
Yaap001430	C13H16O10	[M+H]+	3-O-galloyl-beta-d-glucose*	Phenolic acids	Phenolic acids	-	1.15908e+06	1.32121e+06	918002	1.13837e+06	1.11337e+06	1.24608e+06	1.26348e+06	1.27325e+06	1.25565e+06	1.04766e+06	1.22402e+06	1.26286e+06	-	-
Wchn002309	C20H20O14	[M-H]-	3,4-Di-O-Galloyl-D-Glucose*	Phenolic acids	Phenolic acids	-	5.27983e+06	1.76684e+07	5.09811e+06	4.88022e+06	4.89184e+06	4.65666e+06	7.49754e+06	7.09594e+06	1.04354e+07	7.34787e+06	8.20803e+06	8.94398e+06	-	-
Sacn003282	C17H24O11	[M-H]-	10-hydroxymajoroside	Phenolic acids	Phenolic acids	-	219034	249049	311365	335892	245480	276882	179438	213988	276250	274225	304596	250037	-	-
pmn001529	C28H22O17	[M-H]-	3,4,5-Tri-O-Galloylshikimic acid	Phenolic acids	Phenolic acids	-	8.62309e+06	1.88525e+07	9.85262e+06	8.67829e+06	8.94433e+06	6.29843e+06	9.1181e+06	1.24938e+07	1.11715e+07	1.03754e+07	1.04197e+07	8.68518e+06	-	-
Zbyp002336	C21H24O11	[M+H]+	p-galloyl-oxyphenyl-β-D-glucoside	Phenolic acids	Phenolic acids	-	1.33279e+06	2.54248e+06	603958	2.11926e+06	1.6153e+06	2.21562e+06	1.44245e+06	1.39438e+06	1.31058e+06	1.477e+06	1.7747e+06	1.52248e+06	-	-
pmb0108	C19H18O8	[M+H]+	Feruloyl syringic acid	Phenolic acids	Phenolic acids	-	710996	456500	505349	582382	753520	599321	683306	508883	699465	524833	519915	619521	-	-
Lmhn001386	C12H12O9	[M-H]-	Vnilloyltartaric acid	Phenolic acids	Phenolic acids	-	77259	106130	111462	106779	86880	81301.4	87582.3	87024.2	49623	100033	82273.9	96950.3	-	-
pmb3055	C22H26O14	[M-H]-	p-Coumaroylquinic acid-4'-O-glucuronide	Phenolic acids	Phenolic acids	-	720350	186669	262688	419016	668309	437242	459394	361330	513323	395735	468363	392876	-	-
pmn001511	C13H18O7	[M-H]-	3-Hydroxy-5-Methylphenol-1-O-Glucoside	Phenolic acids	Phenolic acids	-	65272.4	106248	99250.7	76245.4	44628.8	78931.4	142324	47722.9	92450.5	65550.6	73862.6	60371.5	-	-
NK10253223	C8H9NO3	[M+H]+	2-Amino-3-methoxybenzoic acid	Phenolic acids	Phenolic acids	3177-80-8	466450	454193	262133	152257	419305	731577	541810	449124	476112	532638	436994	464785	C05831	ko00380
Walp002129	C16H20O10	[M+H]+	4-Acetoxy-3-Methoxybenzoic Acid glucoside	Phenolic acids	Phenolic acids	-	1.48669e+06	1.57162e+06	1.35199e+06	1.56787e+06	1.78744e+06	1.76419e+06	1.28375e+06	1.36588e+06	1.11919e+06	1.2264e+06	1.5093e+06	1.39788e+06	-	-
Wasn003200	C16H18O11	[M-H]-	O-Feruloylgalactaric acid	Phenolic acids	Phenolic acids	-	482081	464242	721465	420842	645246	556512	406571	457135	409112	465600	401423	493213	C03156	-
Laln005325	C21H30O11	[M-H]-	3,4-dihydroxyallyl benzene-4-O-[α-L-rhamnosyl-(1→6)]-β-D-glucopyranoside	Phenolic acids	Phenolic acids	-	120249	497540	190994	119107	146677	174458	260245	119110	108536	149132	120516	135824	-	-
Zbfn003303	C16H18O8	[M-H]-	3-(Hydroxycinnamoyl)-quinic acid*	Phenolic acids	Phenolic acids	-	893427	1368215	461709	1.84581e+06	1.21672e+06	1.2541e+06	1.26019e+06	1.74652e+06	1.58511e+06	1.18081e+06	951809	1.0898e+06	-	-
Lmsn000363	C16H22O7	[M-H]-	Raspberryketone glucoside	Phenolic acids	Phenolic acids	38963-94-9	542969	3.0367e+06	4.02724e+06	244616	349362	241704	476219	534157	191258	718658	672153	827469	-	-
Lmyn000503	C13H12O11	[M-H]-	Mucic acid-1,4-lactone-2-O-gallate	Phenolic acids	Phenolic acids	-	1.59741e+06	1.27649e+06	1.39387e+06	2.26053e+06	1.55569e+06	1.51569e+06	2.24252e+06	2.53867e+06	2.22942e+06	2.14746e+06	1.73341e+06	1.90378e+06	-	-
Lmtn003598	C18H24O8	[M-H]-	3-Prenyl-4-O-glucosyloxy-4-hydroxybenzoic acid	Phenolic acids	Phenolic acids	-	596570	740832	612990	524300	614260	348726	424646	378334	560444	506347	617730	612736	-	-
Hmsn002948	C18H26O11	[M-H]-	2-Hydroxyphenol-1-O-glucosyl(6→1)rhamnoside	Phenolic acids	Phenolic acids	-	48721.1	84195.4	110356	138117	103386	123489	86310.7	85796.6	80589.3	98370.8	99498.4	118880	-	-
Hmhn002787	C21H32O10	[M-H]-	(1'R,3R,5R,8'S)-Dihydrophaseic acid-O-β-D-glucoside	Phenolic acids	Phenolic acids	-	27638.7	75483	10089.4	41750.5	65943.6	59270.1	58563.9	65881.2	94617.5	60927.3	58863.1	71901.6	-	-
Lmdp003146	C10H14O2	[M+H]+	Rhododendrol	Phenolic acids	Phenolic acids	501-96-2	759077	451698	712767	603077	602065	659575	915996	584984	912398	655920	760365	616506	-	-
MWSmce621	C22H18O12	[M-H]-	Chicoric Acid	Phenolic acids	Phenolic acids	70831-56-0	80810.2	61982.8	74377.2	103715	75903	99479.6	107176	119369	106585	103671	85737.4	86475.5	C10437	-
Lmfn001062	C27H24O18	[M-H]-	2,4,6-Tri-O-galloyl-D-glucose	Phenolic acids	Phenolic acids	108043-99-8	209165	2.70715e+06	1.8528e+06	190399	146396	167572	303150	281243	230663	991753	817749	826759	-	-
Hmmn002544	C16H20O9	[M-H]-	Ferulic acid-4-O-glucoside	Phenolic acids	Phenolic acids	117405-51-3	9.75556e+06	1.20513e+07	1.06819e+07	1.56938e+07	1.34534e+07	1.19462e+07	1.42359e+07	1.93579e+07	1.90741e+07	1.20577e+07	1.2431e+07	1.47704e+07	-	-
MWS20194	C9H8O2	[M+H]+	Cinnamic acid	Phenolic acids	Phenolic acids	140-10-3	183759	121507	204991	152728	191277	160078	125229	89037.4	73669.9	146428	177666	147346	C00423	ko00130,ko00360,ko00940,ko00996,ko00999,ko01100,ko01110
pmb3064	C22H28O13	[M-H]-	3-O-p-Coumaroylquinic acid-O-glucoside	Phenolic acids	Phenolic acids	-	378840	119342	94605.7	456499	228032	341349	259904	246859	326618	231618	290708	260900	-	-
pmp000087	C13H16O6	[M+H]+	2-Feruloyl-sn-glycerol	Phenolic acids	Phenolic acids	-	141100	249972	251306	247309	121570	247234	193501	251337	311160	202243	249926	212314	-	-
Sazp001763	C16H22O9	[M-H]-	4-Hydroxyphenyl 6-O-(2-Methyl-3-Hydroxypropionyl)-Beta-D-Galactopyranoside	Phenolic acids	Phenolic acids	-	652356	694214	1.33977e+06	496419	1.02629e+06	593140	615855	461318	347795	623057	776760	670037	-	-
pmb3075	C16H16O7	[M-H]-	3-O-p-Coumaroylshikimic acid	Phenolic acids	Phenolic acids	-	42291.1	6963.69	14966.4	36838.3	30891.4	37171.1	26582.7	11670	29922.1	29925.7	25738.5	32416	-	-
Jmwn002172	C14H20O8	[M-H]-	3,4-dihydroxyphenylethanol-β-D-glucopyranoside	Phenolic acids	Phenolic acids	-	2.43641e+06	2.27111e+07	1.77243e+07	4.06399e+06	2.90118e+06	3.38414e+06	2.7616e+06	2.53315e+06	1.95681e+06	7.21723e+06	5.82839e+06	6.10342e+06	-	-
Lmgp002452	C14H18O9	[M+H]+	2-Glucosyloxy-(4-hydroxyphenyl)acetic acid (Dhurrin acid)	Phenolic acids	Phenolic acids	-	13340	20098.8	25115.5	13819.2	25035.4	22056.3	26675	5670.78	23323.9	21941.1	19874.4	25005	-	-
Zblp002839	C9H10O3	[M+H]+	3-(3-Hydroxyphenyl)-propionic acid	Phenolic acids	Phenolic acids	621-54-5	3.74688e+06	4.35228e+06	5.38567e+06	3.63063e+06	5.11347e+06	3.94426e+06	4.85412e+06	3.54366e+06	3.08085e+06	4.32808e+06	3.45506e+06	3.7201e+06	C11457	ko00360,ko01100
mws0639	C7H6O4	[M-H]-	2,3-Dihydroxybenzoic Acid*	Phenolic acids	Phenolic acids	303-38-8	191077	3.03947e+06	959795	2.83208e+06	2.20557e+06	622659	2.9702e+06	1.04168e+06	1.53638e+06	2.65119e+06	2.10251e+06	2.31126e+06	C00196	ko01110
mws0180	C7H6O4	[M-H]-	2,5-Dihydroxybenzoic acid; Gentisic Acid*	Phenolic acids	Phenolic acids	490-79-9	191077	3.03947e+06	959795	2.83208e+06	2.20557e+06	622659	2.9702e+06	1.04168e+06	1.53638e+06	2.65119e+06	2.10251e+06	2.31126e+06	C00628	ko00350,ko01100
HJAP046	C12H14O5	[M+H]+	1-(2,4,5-Trimethoxyphenyl)-1,2-propanedione	Phenolic acids	Phenolic acids	2020-84-0	9385.27	18065.7	27704.2	42979.8	119684	51680	83365	61330.3	61572.9	79538.5	68355	86654.4	-	-
MWSmce712	C10H12O2	[M+H]+	Ethyl phenylacetate	Phenolic acids	Phenolic acids	101-97-3	281311	257193	303303	181869	147434	175411	148237	230607	183855	158361	197395	194792	-	-
mws0183	C7H6O4	[M-H]-	3,4-Dihydroxybenzoic acid (Protocatechuic acid)*	Phenolic acids	Phenolic acids	99-50-3	661099	3.00795e+06	5.78916e+06	3.1944e+06	2.31878e+06	2.78423e+06	2.83722e+06	1.0566e+06	1.32755e+06	2.64266e+06	2.07299e+06	2.31375e+06	C00230	ko00400,ko01100,ko01110
Lmqp001457	C14H18O10	[M+H]+	Methyl gallate-4-O-β-D-glucoside	Phenolic acids	Phenolic acids	-	614106	614650	411365	981268	541442	659914	873743	812729	835234	575432	526644	669361	-	-
Cmzn005999	C21H22O11	[M-H]-	Dunalianoside B	Phenolic acids	Phenolic acids	-	3.93687e+07	5.0091e+06	3.9784e+06	1.21284e+07	6.05548e+06	3.47738e+07	1.32383e+07	2.52765e+07	1.68567e+07	2.10763e+07	1.66005e+07	2.02437e+07	-	-
Lmyn003028	C19H28O11	[M-H]-	Benzyl-β-gentiobioside*	Phenolic acids	Phenolic acids	56775-64-5	1.72583e+06	3.11673e+06	1.53927e+06	2.2544e+06	1.10477e+06	1.54949e+06	1.23153e+06	722041	1.24138e+06	1.30929e+06	1.25506e+06	1.57497e+06	-	-
WaYn005032	C22H22O11	[M-H]-	Gentisic acid 2-O-(6''-O-p-coumaroyl)Glucoside	Phenolic acids	Phenolic acids	-	3.09831e+06	5.09497e+06	5.19753e+06	4.57053e+06	3.04392e+06	4.13316e+06	4.60443e+06	4.20839e+06	4.74361e+06	4.57282e+06	3.6916e+06	4.65879e+06	-	-
Hmhn003067	C15H18O8	[M-H]-	Phenylpropionic acid-O-β-D-glucopyranoside	Phenolic acids	Phenolic acids	-	2.67031e+06	5.26344e+06	5.32892e+06	9.60598e+06	10954365	8.61141e+06	11271070	13534625	6.15066e+06	5.00466e+06	4.23465e+06	5.43511e+06	-	-
Zmhn004909	C21H18O13	[M-H]-	3,4-Digalloylshikimic acid	Phenolic acids	Phenolic acids	-	735161	1.40161e+06	1.12385e+06	702503	765630	779495	615591	621222	820850	691200	888040	788730	-	-
mws0028	C8H8O4	[M-H]-	Vanillic acid	Phenolic acids	Phenolic acids	121-34-6	85396.7	210669	69452.8	55322.2	107743	64188.8	32988.5	81182.8	162677	78343	89766.8	100686	C06672	-
mad2116	C22H18O10	[M-H]-	Bis(p-Coumaroyl)tartaric acid	Phenolic acids	Phenolic acids	-	42070.5	95254.1	45046.5	41153.1	80295.3	34130	44434.4	65336.1	47408.6	56885.3	55122.2	44802.7	-	-
Jmwn004371	C31H40O16	[M-H]-	4-Hydroxyphenethoxy-8-O-β-D-[6-O-(4-O-β-D-glucopyranosyl)-sinapoyl]glucopyranoside	Phenolic acids	Phenolic acids	-	98370	38689.4	98370	178907	53230	90035	65331.2	70778.7	85030	81695	93370	105045	-	-
Lmhn003802	C26H26O14	[M-H]-	Sinapoylsinapoyltartaric acid	Phenolic acids	Phenolic acids	-	117581	15515.6	33204.9	73235.5	107939	82387.4	64016.3	47449.5	36999.3	49397.7	62631.2	52766.3	-	-
MWSmce587	C9H10O4	[M+H]+	2,6-Dimethoxybenzoic acid	Phenolic acids	Phenolic acids	1466-76-8	1309330	303933	532665	1363165	1203400	1405235	938085	909565	1225255	1243745	964930	1100910	-	-
MWSslk110	C13H16O7	[M+H]+	Helecin	Phenolic acids	Phenolic acids	618-65-5	189673	80025	216125	288507	245980	464799	161462	277696	99980.5	246537	192579	235415	-	-
pmn001712	C22H34O12	[M+CH3COOH-H]-	3-Hydroxy-4-isopropylbenzylalcohol-3-O-sophoroside	Phenolic acids	Phenolic acids	-	248191	203184	319901	221126	291453	178848	296318	193784	309339	190473	225112	247333	-	-
pmn001468	C19H26O13	[M-H]-	Sibiricose A3	Phenolic acids	Phenolic acids	139726-39-9	36354.5	60694.5	53877.3	63933.9	36980.6	69910.6	33427.1	65097.9	28356.5	45401.7	44092.2	35445.7	-	-
Wchn003157	C20H20O14	[M-H]-	1,6-Di-O-Galloyl-D-Glucose*	Phenolic acids	Phenolic acids	-	323734	1.40042e+06	970684	600591	277651	305372	605062	562076	701631	807939	638399	807545	-	-
Lmsn002288	C21H28O14	[M-H]-	1-O-Caffeoyl-(6-O-glucosyl)-β-D-glucose	Phenolic acids	Phenolic acids	-	1.07799e+06	580318	691442	1.99796e+06	1.07984e+06	1.70181e+06	1.37224e+06	1.04916e+06	1.19359e+06	997296	1.29886e+06	1.17559e+06	-	-
Zbyn003347	C19H20O11	[M-H]-	4-O-Galloylarbutin	Phenolic acids	Phenolic acids	-	2.21084e+06	2.15785e+06	2.47516e+06	1.84498e+06	2.149e+06	2.3799e+06	2.01029e+06	2.08722e+06	1.99419e+06	1.61505e+06	2.02668e+06	2.06539e+06	-	-
Lmzn001983	C16H24O10	[M-H]-	D-Threo-guaiacylglycerol-7-O-β-D-glucoside	Phenolic acids	Phenolic acids	-	2.28366e+06	2.78806e+06	4.82465e+06	2.78241e+06	2.46907e+06	2.31777e+06	2.20415e+06	2.48106e+06	2.19093e+06	2.60994e+06	1.99819e+06	2.2936e+06	-	-
mws0885	C7H6O4	[M-H]-	2,4-Dihydroxybenzoic acid	Phenolic acids	Phenolic acids	89-86-1	1.84897e+07	1.63697e+07	1.28404e+07	1.69286e+07	1.23225e+07	9.10504e+06	1.61924e+07	1.73444e+07	1.52978e+07	1.18956e+07	1.3565e+07	1.55264e+07	-	-
Lman004552	C21H22O9	[M-H]-	Robustaside A;[6'-p-Coumarylarbutin]	Phenolic acids	Phenolic acids	148810-39-3	49932.1	47460.2	59206.4	45111	81427.7	62080	48617.4	59757.3	38078.6	50383.7	62695.1	49811.7	-	-
Lmdp002901	C15H22O8	[M+H]+	2,6-Dihydroxy-4-isopropylphenyl-1-O-β-D-glucoside	Phenolic acids	Phenolic acids	-	377814	283620	542379	202927	320837	473388	483388	522756	256149	512163	468889	390931	-	-
Zmhn005413	C15H12O9	[M-H]-	p-Dimeric galloyl methyl ester	Phenolic acids	Phenolic acids	-	49423.2	54084.2	48135.7	45763.9	53619.3	51791.1	47546	66311.6	52655.1	46748.3	41949.9	54681.3	-	-
Lmsn003111	C15H18O8	[M-H]-	1-O-p-Coumaroyl-β-D-glucose	Phenolic acids	Phenolic acids	7139-64-2	2.86558e+06	2.64375e+06	2.45769e+06	4.38871e+06	6.50233e+06	3.95791e+06	8.08721e+06	5.80861e+06	1.47116e+07	4.62374e+06	4.54091e+06	5.74258e+06	C16827	-
pmn001521	C20H22O11	[M-H]-	3-Hydroxy-5-Methylphenol-1-O-(6'-Galloyl)Glucoside	Phenolic acids	Phenolic acids	-	57206.4	155135	186196	81820.9	103375	100797	95108.6	68512.9	63425.4	116789	106094	88905.8	-	-
Wbmp011762	C16H22O4	[M+H]+	Dibutylphthalate(ISO-2)	Phenolic acids	Phenolic acids	-	2.36494e+06	4.19153e+06	5.13634e+06	4.01207e+06	6.51867e+06	4.69794e+06	3.64012e+06	3.90275e+06	4.3957e+06	5.41035e+06	4.4778e+06	5.88974e+06	-	-
Cmyp007259	C20H22O9	[M+H]+	Poliothrysoside; Nigracin	Phenolic acids	Phenolic acids	18463-25-7	191713	85100.8	79890.2	210887	333099	248893	273144	131689	65803.8	202105	211421	161634	-	-
Zbfn001230	C19H26O14	[M-H]-	3'-Gallic acyl sucrose	Phenolic acids	Phenolic acids	-	747143	1.25325e+06	891650	782485	725275	890232	666315	715476	768327	770594	599836	773865	-	-
Wmmp000110	C14H18O9	[M+H]+	mudanoside A	Phenolic acids	Phenolic acids	-	159192	235950	168583	207412	148930	190419	204936	180416	246663	178225	135193	152373	-	-
mws0008	C9H10O2	[M-H]-	Hydrocinnamic acid*	Phenolic acids	Phenolic acids	501-52-0	152009	40291.7	118715	96792.3	126960	42377.4	73349.6	92644.7	127659	74879.6	92923.6	99243.1	C05629	ko00360,ko01100
Lmmn003541	C33H28O18	[M-H]-	Iriflophenone-3-C-(2'',6''-Di-O-Galloyl)Glucoside	Phenolic acids	Phenolic acids	-	1.13921e+07	8.16973e+06	7.72432e+06	5.90778e+06	1.02351e+07	7.16118e+06	9.12619e+06	7.15083e+06	6.12099e+06	6.82363e+06	8.86888e+06	7.20902e+06	-	-
mws4193	C9H12O3	[M-H]-	Homovanillic alcohol; 4-Hydroxy-3-methoxyphenethanol	Phenolic acids	Phenolic acids	2380-78-1	42422.5	37523.8	36370.9	35962.9	32123.6	21233.6	26007.3	34546.6	27299.8	29189.6	30302.3	37719.9	-	-
Zmhn002334	C16H20O9	[M-H]-	6-O-Feruloyl-β-D-glucose	Phenolic acids	Phenolic acids	137887-25-3	508844	370289	813990	543081	792118	494129	918654	828271	487175	724079	659852	537871	-	-
Lmrn003000	C9H10O3	[M-H]-	2-Hydroxy-3-phenylpropanoic acid	Phenolic acids	Phenolic acids	7326-19-4	3340	3116.61	3129.17	14441.1	31786.7	15042.5	25973.4	32376.6	40363.3	23144.2	17327.9	18990.8	C05607	ko00360,ko00960,ko01100,ko01110
Lmyn003835	C14H10O7	[M-H]-	4-(3,4,5-Trihydroxybenzoxy)benzoic acid	Phenolic acids	Phenolic acids	-	875210	523375	634967	672277	954649	715792	731431	700333	594207	700280	664420	876006	-	-
Hmgn001278	C20H30O12	[M-H]-	Verbasoside	Phenolic acids	Phenolic acids	61548-34-3	85044.3	220743	223624	68828.2	52672.1	63204.8	49442	59314.4	59498.9	81632.6	62297.3	64484.2	-	-
pma0149	C15H16O9	[M+H]+	Sinapoyl malate	Phenolic acids	Phenolic acids	92344-58-6	203398	1.01107e+06	459315	449553	468583	443076	465960	395025	371953	466110	349330	374490	C02887	ko00940,ko01110
Hmhn000927	C12H16O8	[M-H]-	Phloroglucinol-1-O-β-D-glucopyranoside	Phenolic acids	Phenolic acids	-	1.23415e+07	1.53088e+07	1.10062e+07	1.03941e+07	1.68768e+07	1.40659e+07	1.10745e+07	1.19446e+07	1.36559e+07	9.76142e+06	1.34047e+07	1.23327e+07	-	-
Hmbp001276	C8H8O4	[M+H]+	Gallacetophenone	Phenolic acids	Phenolic acids	528-21-2	82902.3	53226.3	86883.2	76731.9	65719.4	100525	107439	109641	73350.8	103072	126913	93518	-	-
pmb2654	C19H27NO12	[M-H]-	Anthranilate-1-O-Sophoroside	Phenolic acids	Phenolic acids	-	38376.6	150341	325198	94658.1	42313.8	44777.7	96359.3	84146.6	41828	64453.8	77247.4	56091.4	-	-
Lmgn002253	C31H36O18	[M-H]-	Syringoylcaffeoylquinic acid-D-glucose	Phenolic acids	Phenolic acids	-	3357.35	19846.4	19297.7	20297.4	9062.26	9007.44	7948.02	17261.6	31278.5	11670	10077.4	13902.2	-	-
Lmhn002574	C20H16O11	[M-H]-	Caffeoyl(p-Hydroxybenzoyl)tartaric acid	Phenolic acids	Phenolic acids	-	774050	285290	134199	1.07749e+06	615759	830680	580202	741295	475688	507621	694042	675912	-	-
Lakn003294	C15H20O9	[M-H]-	2-β-D-Glucopyranosyloxy-5-hydroxyphenylacetic acidmethylester*	Phenolic acids	Phenolic acids	-	4.90093e+06	5.80252e+06	5.95675e+06	12464790	3.84091e+06	11260260	5.42114e+06	4.27099e+06	4.83098e+06	5.42062e+06	4.77239e+06	3.86406e+06	-	-
Zmln001312	C12H8O6	[M-H]-	Brevifolin[Geranium]	Phenolic acids	Phenolic acids	477-94-1	34719	21217.9	26665	94424.3	43079.6	71635.7	74516.3	55762.8	72756.9	53130.1	52367.4	69974.4	-	-
Lajp003510	C15H10O5	[M+H]+	Furo(2,3-f)-1,3-bewnzodioxole	Phenolic acids	Phenolic acids	-	185506	221180	154393	452390	215919	238090	139607	185421	194634	132186	180077	182462	-	-
mws0467	C9H10O3	[M-H]-	3-(4-Hydroxyphenyl)-propionic acid	Phenolic acids	Phenolic acids	501-97-3	10629.4	12471	21079.5	22507.5	36214.2	32546.1	24345.4	54304.8	66479.4	26271.5	31181.9	21848.1	C01744	ko01100
Cmsn000894	C14H18O11	[M-H]-	7-O-Galloyl-D-sedoheptulose	Phenolic acids	Phenolic acids	-	347088	1.41049e+06	680824	688249	329508	546798	714298	442858	432380	493310	365177	520540	-	-
Cmsn002813	C16H14O7	[M-H]-	Methyl 2-O-(4-hydroxybenzoyl)-2,4,6-trihydroxyphenylacetate	Phenolic acids	Phenolic acids	-	83146.3	39580.9	54995.4	33648.5	61716.2	64150.6	29499.8	16851.6	80623.2	68233.6	50013.4	50770.4	-	-
HJAP044	C12H16O4	[M+H]+	1-(2,4,5-Trimethoxyphenyl)propan-1-one	Phenolic acids	Phenolic acids	3904-18-5	247172	926528	703444	299488	255020	427507	306715	349325	495865	571150	412233	431050	-	-
pmb0752	C17H20O9	[M+H]+	3-O-Feruloylquinic acid	Phenolic acids	Phenolic acids	1899-29-2	76272.8	195140	191797	192494	115430	133008	193821	240422	260452	130925	163216	190411	C02572	-
Lmnn002886	C23H26O11	[M-H]-	1'-O-(3,4-Dihydroxyphenethyl)-O-caffeoyl-glucoside	Phenolic acids	Phenolic acids	-	829686	2.22652e+06	2.11361e+06	1.56693e+06	1.55854e+06	1.80498e+06	1.77291e+06	1.29683e+06	1.08373e+06	1.16094e+06	1.17221e+06	1.58486e+06	-	-
MWSslk155	C9H10O5	[M-H]-	4-Hydroxy-3-methoxymandelate	Phenolic acids	Phenolic acids	55-10-7	186420	67744.2	122163	127286	180081	136408	153186	140930	142423	157536	215922	160142	C05584	ko00350,ko01100
Lmgp003989	C25H22O11	[M+H]+	Dicaffeoylshikimic acid	Phenolic acids	Phenolic acids	-	78931.4	90535.2	88365	66628.3	86700	99090	90035	85287.7	79584.3	126564	87645	119473	-	-
Zmgn001989	C7H8O2	[M-H]-	3-Methylcatechol	Phenolic acids	Phenolic acids	488-17-5	35010	32670	5005	18472.4	18145.4	14893.5	7259.63	22643.5	19662.2	17578.7	19067.3	13111.1	C02923	ko01100
mws2105	C14H12O3	[M+H]+	Benzyl salicylate	Phenolic acids	Phenolic acids	118-58-1	93730.4	398661	153760	259165	115353	195273	85533	99149.4	288517	218590	147438	200703	-	-
mws1509	C13H10O3	[M+H]+	Phenyl salicylate	Phenolic acids	Phenolic acids	118-55-8	149237	71950.6	99639.2	107097	108831	132869	84802.1	77472.8	85333.2	133877	89207.7	113777	C14163	-
pma3724	C17H20O9	[M+H]+	1-O-Feruloylquinic acid	Phenolic acids	Phenolic acids	-	71690	38183.4	29778.7	101710	83365	123390	42137.4	268590	66685	40235.7	48773.9	60748	-	-
pmb2833	C23H30O14	[M-H]-	3-O-Feruloylquinic acid-O-glucoside	Phenolic acids	Phenolic acids	-	9	9	9	24181.6	7531.29	9836.24	16350.5	22340.4	37399.6	14224	10365.8	15909.3	-	-
Hmsn002598	C13H18O8	[M-H]-	Salirepin	Phenolic acids	Phenolic acids	26652-12-0	663978	1.49701e+06	1.97779e+06	600473	638587	576384	492438	344355	748088	796637	1.1373e+06	807818	-	-
MWSHC20168	C7H6O4	[M-H]-	Methyl cumalate	Phenolic acids	Phenolic acids	6018-41-3	100670	411977	849980	329389	297639	395311	383643	199359	251641	367249	255123	263123	-	-
Sazp002185	C17H24O9	[M+H]+	Multifidol Glucoside	Phenolic acids	Phenolic acids	-	638100	160347	230401	286715	180120	191810	242239	237166	419404	249649	166797	189353	-	-
pmn001384	C25H24O12	[M-H]-	Isochlorogenic acid C*	Phenolic acids	Phenolic acids	57378-72-0	561982	576953	537293	548094	527345	501289	472855	792708	436848	721525	605600	467315	-	-
Cmzp002057	C14H18O8	[M+H]+	6-O-Acetylarbutin	Phenolic acids	Phenolic acids	10338-88-2	355874	422154	479370	407820	250938	425291	295111	397814	187695	389869	277202	271896	-	-
mws0853	C11H14O4	[M-H]-	Sinapyl alcohol*	Phenolic acids	Phenolic acids	537-33-7	337620	116158	206139	114884	269722	103534	232806	273255	158891	173385	179709	251124	C02325	ko00940,ko01100,ko01110
mad2394	C24H22O12	[M-H]-	Sinapoyl-p-coumaroyltartaric acid	Phenolic acids	Phenolic acids	-	36749.5	20661.8	50015	51353.1	63645.4	67315.3	28089.6	36029	27038	41815.1	32861.3	50822.8	-	-
Yshj000011	C14H20O9	[M+H]+	2,6-dimethoxy-4-hydroxyphenyl-1-O-beta-D-glucopyranoside*	Phenolic acids	Phenolic acids	-	1.84766e+06	1.0697e+06	1.12284e+06	1.6712e+06	2.14478e+06	2.43092e+06	2.27509e+06	2.08137e+06	1.8861e+06	1.48999e+06	1.28936e+06	1.95717e+06	-	-
MWSmce663	C8H10O3	[M-H]-	Vanillyl alcohol	Phenolic acids	Phenolic acids	498-00-0	14454.6	18501.8	21392.4	11647.6	78360	16188.6	20005	12718.7	6670	51680	50015	33340	-	-
mws1358	C6H6O2	[M-H]-	Pyrocatechol	Phenolic acids	Phenolic acids	120-80-9	104896	72728.9	79682.6	133511	62341.8	110528	108460	67767	103029	94334.9	84822.1	128840	C00090	ko01100
Zbfn004301	C23H24O11	[M-H]-	2-O-(4-carboxylic acid phenethyl)-6-O-caffeoyl glucoside	Phenolic acids	Phenolic acids	-	2.26047e+06	8236630	4.36135e+06	2.71136e+06	2.07269e+06	2.93641e+06	3328460	2.05571e+06	2.59576e+06	3.51543e+06	2.20552e+06	2.99248e+06	-	-
mws1584	C25H24O12	[M-H]-	1,3-O-Dicaffeoylquinic Acid (Cynarin)	Phenolic acids	Phenolic acids	30964-13-7	106710	22831.2	63350	133400	42752.8	141740	105045	125060	75025	98370	140075	93370	C10445	-
Hmqp002567	C17H17NO3	[M+H]+	4-Hydroxycinnamic acid p-hydroxyphenethylamine	Phenolic acids	Phenolic acids	-	141608	216616	200023	189192	119237	168228	155283	138039	176948	154206	140372	214399	-	-
WaYp002866	C15H20O8	[M+H]+	3-(4-hydroxyphenyl)-3-oxopropyl beta-D-glucopyranoside	Phenolic acids	Phenolic acids	53170-92-6	88365	31675	190098	79763.7	68434.5	87391.9	95953.6	21675	105748	102661	141874	92295.2	-	-
MWS0550	C9H8O	[M+H]+	Cinnamaldehyde	Phenolic acids	Phenolic acids	14371-10-9	104836	138852	163430	212790	111715	149485	127512	135055	114048	121903	195140	153512	C00903	ko00940,ko01100,ko01110
Wchn005577	C22H22O11	[M-H]-	1-O-Galloyl-2-O-Cinnamoyl-β-D-glucose	Phenolic acids	Phenolic acids	56994-83-3	2.46474e+07	2.15477e+07	2.4238e+07	2.49427e+07	2.06885e+07	3.39167e+07	1.68796e+07	3.45295e+07	3.9909e+07	2.74957e+07	1.82422e+07	2.914e+07	-	-
Smrp001932	C12H18O5	[M+H]+	(2R)-3-(3',4',5'-trimethoxyphenyl)-1,2-propanediol	Phenolic acids	Phenolic acids	-	191800	298650	211913	133400	60945.1	166770	113385	103506	110045	122773	173445	112341	-	-
MWSmce264	C8H10O3	[M-H]-	Hydroxytyrosol	Phenolic acids	Phenolic acids	10597-60-1	1.0349e+06	5.03109e+06	6.11516e+06	1.97338e+06	1.45264e+06	1.76361e+06	1.5946e+06	1.9716e+06	1.21183e+06	1.92834e+06	3.06909e+06	2.19765e+06	-	-
Lmgn002250	C31H34O17	[M-H]-	Dicaffeoylquinic acid-O-glucoside	Phenolic acids	Phenolic acids	-	6955.28	2164.03	8666.82	70289.4	28481.8	60109	36618	22578.7	34934.2	28359.3	17270.8	27396.7	-	-
pmn001548	C33H34O23	[M-H]-	2-O-Trigalloyl-glucose-glucose	Phenolic acids	Phenolic acids	-	33285	40451.8	46069.6	26405.6	53941.9	39329.6	30338.4	44476.8	39327.9	41600.4	25296.7	42288.5	-	-
mws1686	C9H10O3	[M+H]+	Paeonol	Phenolic acids	Phenolic acids	552-41-0	208986	84854	224399	115575	167992	136215	177482	159411	84024.4	121930	203027	205866	C10712	-
MWS1830	C9H10O3	[M+H]+	Ethylsalicylate	Phenolic acids	Phenolic acids	118-61-6	371891	411906	441012	270117	270207	273232	287240	145654	301081	329584	434510	251703	-	-
Cmrn003434	C31H38O16	[M-H]-	Tubuloside C	Phenolic acids	Phenolic acids	-	487097	349513	319182	301949	361752	689189	329572	395931	338658	419645	294783	251282	-	-
pme3083	C8H7NO3	[M-H]-	2-(Formylamino)benzoic acid	Phenolic acids	Phenolic acids	3342-77-6	97642.9	61589.3	55646.3	94351.4	89485.9	57400.5	83115	60923.6	83074.5	94364.8	86597.5	54090.2	C05653	ko00380,ko01100
Lmlp001436	C9H10O4	[M+H]+	Dihydrocaffeic acid	Phenolic acids	Phenolic acids	1078-61-1	265401	255539	208194	266077	232581	269877	290971	451574	291304	293911	450715	280016	C10447	ko00350,ko01100
pma0675	C8H8O3	[M+H]+	o-Anisic acid	Phenolic acids	Phenolic acids	579-75-9	86941.4	59396	66685	70123	99771.1	93721.7	66713.2	77671.8	52588.2	51874.3	92504	78864.8	-	-
Li512115	C25H24O12	[M-H]-	Isochlorogenic acid B	Phenolic acids	Phenolic acids	14534-61-3	326860	391498	585558	293919	451273	307082	272399	531638	278774	406985	503751	702484	C10468	-
Lmbn004847	C10H12O3	[M-H]-	4-Methoxyphenylpropionic acid	Phenolic acids	Phenolic acids	-	41889.4	49419.5	128033	105068	80124.9	54944.8	44619.9	98496.8	82160.9	84296.2	46825.6	76369.5	-	-
pmn001528	C28H18O17	[M-H]-	Tetragallic Acid(3''-O-galloyl-4''-O-galloyl-4-O-galloyl-galloyl acid)	Phenolic acids	Phenolic acids	-	28340	23517.4	44712.5	65020	28340	31675	30258	38990.8	43288.2	33024.5	24070.4	43326.7	-	-
Lakp003115	C14H16O8	[M+H]+	5-O-β-D-Glucopyranosyl-3-hydrobenzo(b)fu-ran-2-one	Phenolic acids	Phenolic acids	-	333192	623036	399132	335410	765382	415413	336362	419085	271922	584929	818994	464016	-	-
Lmhn003494	C20H16O10	[M-H]-	Caffeoylbenzoyltartaric acid	Phenolic acids	Phenolic acids	-	157381	326548	345408	266698	167573	163762	203164	166079	239616	228916	289765	157991	-	-
MWSmce229	C9H10O4	[M+H]+	3,4-Dimethoxybenzoic acid; Veratric acid	Phenolic acids	Phenolic acids	93-07-2	111222	130702	176780	158425	111222	108991	161765	181790	195140	251895	140075	183455	-	-
MWSmce454	C8H8O3	[M-H]-	3,5-Dihydroxyacetophenone	Phenolic acids	Phenolic acids	51863-60-6	5.06692e+06	3.65646e+06	2.98893e+06	9.95528e+06	8.61512e+06	6.73645e+06	5.11968e+06	5.43629e+06	2.96338e+06	7.06942e+06	4.05156e+06	4.81633e+06	-	-
Zbjn005476	C34H30O15	[M-H]-	1,3,4-Tri-O-Caffeoyl Quinic Acid	Phenolic acids	Phenolic acids	-	107811	124885	109990	97068	107280	106772	107846	93347.7	97929.1	131279	97064.7	71108.1	-	-
Lmcn002982	C9H10O5	[M-H]-	Methyl 3-O-Methyl Gallate	Phenolic acids	Phenolic acids	3934-86-9	41016.3	84295.5	188465	93370	68552.5	85030	61244.7	41038.9	113385	95740.7	100158	54034.6	-	-
[truncated: 306 more rows]

## Sheet: Table S2
Supplementary Table S2. The relative content information of 17 shared DFs detected by UPLC-MS/MS .
[truncated: 18 more rows]

[truncated: 2 more sheets: Table S3, Table S4]
